# Supplementary material for: Transcription Elongation Machinery Is a Druggable Dependency and Potentiates Immunotherapy in Glioblastoma Stem Cells
Source: Oxford University Press journal article supplement (doi:10.1158/2159-8290.cd-20-1848), 2022-01-13
Supplement: 21598290cd201848-sup-257762_2_supp_7373639_qyxwb0.xlsx [file 21598290cd201848-sup-257762_2_supp_7373639_qyxwb0.xlsx]

## Sheet: NSC
Supplementary Table S1. Chromatin regulator analysis in glioblastoma stem cells.
Gene	GSC vs. NSC		GSC vs. DGC
	Coefficient	Pvalue	Coefficient	Pvalue
ARID3A	0.0812262	0.000117	-0.0380227	0.0103
ATF1	0.09649	2.13e-11	0.0193518	0.13
ATF2	0.0658208	8.27e-06	0.0596461	0.00637
ATF3	0.110349	2.2e-10	-0.120241	0.00464
BACH1	0.142095	0.000714	0.0594189	0.0121
BATF	0.0115648	0.475	-0.0891212	3.5e-09
BCL11A	-0.2075	1.45e-06	-0.0619198	0.000379
BCL3	0.108468	0.000826	-0.213171	4.86e-10
BDP1	0.146026	0.00168	0.116532	0.118
BHLHE40	0.117174	3.99e-11	0.0719231	5.44e-06
BRCA1	0.103545	9.58e-09	0.0446645	0.0188
BRF1	0.112658	0.0193	0.0644874	0.166
BRF2	0.0987236	0.101	-0.0767781	0.208
CBX3	0.0879261	5.6e-12	0.0317836	0.00632
CCNT2	0.0807122	4.02e-06	0.113644	0.00663
CEBPB	0.103617	4.98e-08	-0.35367	7.51e-103
CEBPD	0.0657402	0.000359	0.0372093	0.0292
CHD1	0.130483	7.18e-11	-0.0829122	3.06e-12
CHD2	0.0662398	2.02e-07	0.0513901	4.22e-06
CREB1	0.070027	4.23e-09	0.0204472	0.0564
CREM	0.0746057	1.21e-14	0.0318004	0.000277
CTBP2	0.207581	4.54e-16	-0.0230174	0.332
CTCFL	0.0627647	0.000333	0.0795576	3.01e-07
CUX1	0.274865	0.0301	-0.0193631	0.68
E2F4	0.426722	1.45e-22	0.104798	2.03e-13
E2F6	0.183344	4.32e-23	0.0993752	1.76e-18
EBF1	0.047755	0.321	0.0392604	0.338
EGR1	0.0670425	0.000116	0.060192	0.000211
ELF1	0.0997221	2.68e-17	-0.0907593	4.42e-09
ELK1	0.139616	1.8e-07	0.0914951	0.001
ELK4	0.129041	1.3e-17	0.0688639	1.37e-05
EP300	-0.270467	6.3e-11	0.0383839	5.55e-05
ESR1	-0.194148	1.2e-09	0.0745596	0.00361
ESRRA	0.205922	3.71e-06	0.208343	0.0188
ETS1	0.122266	1.16e-11	-0.457665	1.38e-77
EZH2	0.426356	5.85e-58	-0.124504	1.64e-05
FOS	-0.113375	1.03e-15	0.192081	5.76e-07
FOSL1	-0.0567585	0.00489	0.0888955	6.33e-08
FOSL2	-0.15676	8.98e-18	0.291827	8.74e-35
FOXA1	-0.108296	1.5e-05	-0.323514	1.53e-139
FOXA2	-0.011304	0.435	-0.0773832	1.98e-05
FOXM1	0.0599853	8.28e-05	-0.316502	4.23e-81
FOXP2	0.09927	7.84e-10	-0.0971196	2.68e-10
GABPA	0.0839999	7.71e-15	-0.0323809	0.0162
GATA1	0.0604913	8.42e-06	-0.0104254	0.468
GATA2	-0.136084	4.76e-10	0.013552	0.426
GATA3	0.524448	0.00872	0.0830629	7.77e-09
GTF2B	0.3221	4.52e-17	-0.0344549	0.00596
GTF2F1	0.177488	1.62e-12	-1.31255	1.42e-76
GTF3C2	0.192781	0.000145	-0.120673	6.49e-12
HA.E2F1	0.12058	9.03e-33	0.0969	0.00762
HCFC1	0.0778923	1.32e-12	-0.103455	4.4e-06
HDAC1	0.203863	6.42e-27	-0.0697823	0.112
HDAC2	0.111569	0.000394	0.0453507	8.62e-07
HDAC6	0.169329	0.0106	0.0599392	6.66e-10
HDAC8	0.105653	0.0461	0.117844	4.88e-12
HMGN3	0.0718929	1.09e-05	0.123398	7.19e-06
HNF4A	-0.0202569	0.289	0.144069	0.0152
HNF4G	-0.0287416	0.119	0.161272	0.00102
HSF1	0.178988	6.96e-06	0.0406778	0.0252
IKZF1	-0.0205225	0.362	0.0209668	0.223
IRF1	0.194636	4.7e-17	0.0859183	0.0161
IRF3	0.369483	0.00148	-0.09119	1.07e-05
IRF4	0.0216375	0.21	-0.251433	5.4e-09
JUN	-0.118311	4.42e-11	0.334379	0.00115
JUNB	0.00803951	0.56	-0.048181	0.00274
JUND	-0.091895	2.85e-10	-0.234078	6.21e-89
KAT2A	0.126793	1.72e-05	-0.271376	3.11e-67
KDM5A	0.111474	9.78e-12	0.0214475	0.409
KDM5B	0.133229	4.74e-23	0.0617853	8.33e-06
MAFF	0.0615315	3.95e-05	0.0500161	9.1e-05
MAFK	0.0621914	0.00225	-0.0582023	0.00116
MAX	0.189103	2.32e-41	-0.222701	4.28e-37
MBD4	0.131047	0.00303	0.0726674	2.66e-14
MEF2A	0.0525829	0.00273	-0.0517592	0.211
MEF2C	0.0775955	0.00261	-0.0232921	0.143
MTA3	0.0978363	0.000235	0.00422294	0.855
MXI1	0.146724	3.51e-37	0.0271867	0.306
MYBL2	0.124469	7.54e-10	0.122584	3.23e-32
MYC	0.305752	5.04e-65	0.0342052	0.0778
NANOG	-0.161978	1.68e-06	0.147308	1.26e-24
NFATC1	0.126496	0.0016	0.0515353	0.111
NFE2	0.0717755	0.00385	0.0171286	0.667
NFIC	0.0655128	0.00213	-0.100507	0.0219
NFYA	0.0268735	0.0639	-0.0682314	1.89e-05
NFYB	0.0498282	0.00786	0.0486712	0.000151
NR2C2	0.0667479	8.61e-05	0.0478564	4.16e-05
NR2F2	0.031927	0.103	0.0467474	0.0067
NR3C1	-0.227868	3.55e-10	0.00889894	0.618
NR4A1	-0.00915149	0.765	-0.279581	1.52e-26
NRF1	0.124494	5.91e-22	0.0592337	1.45e-08
PAX5	0.111475	2.87e-09	0.0666179	6.59e-05
PBX3	0.00578989	0.675	0.0240471	0.044
PHF8	0.102194	1.28e-31	0.0498983	9.46e-10
PML	0.161023	1.27e-19	0.0601166	0.000556
POLR3A	0.123541	0.00791	-0.145605	0.0935
POLR3G	0.148353	0.0066	0.0621172	0.222
POU2F2	0.08707	7.4e-07	0.0425403	0.0565
POU5F1	-0.168153	2.73e-05	0.0239196	0.531
PRDM1	0.272311	0.0457	-0.229765	2.05e-16
RAD21	0.046533	0.00138	-0.101557	3.23e-23
RBBP5	0.192176	1.67e-40	0.0615877	2.35e-06
RCOR1	0.0957943	1.43e-06	-0.118304	4.5e-12
RELA	0.10313	2.21e-05	-0.0924748	0.000507
REST	0.173086	1.72e-15	0.243204	9.27e-32
RFX5	-0.283267	6.97e-11	0.154335	0.00306
RUNX3	0.0350176	0.0021	-0.0202123	0.0628
RXRA	-0.240631	6.66e-06	0.0340685	0.0834
SAP30	0.204471	2.15e-32	0.114198	1.75e-13
SETDB1	0.161776	7.37e-12	0.0775066	0.000162
SIN3A	0.120109	6.79e-23	0.080513	1.15e-12
SIRT6	0.112378	0.000135	-0.0617958	0.572
SIX5	0.0504546	0.00403	0.054722	0.000369
SMAD5	0.215474	4.32e-22	0.0763579	0.000195
SMARCA4	0.0385725	0.0974	-0.104897	2.98e-07
SMARCB1	0.136121	8.59e-15	-0.0412936	0.00793
SMARCC1	-0.0383893	0.0994	-0.1878	8.4e-19
SMARCC2	0.0174176	0.473	-0.0713147	0.000765
SMC3	0.0143111	0.159	-0.0891471	5.23e-15
SP1	0.0383105	0.0132	0.0674385	1.2e-06
SP2	0.0602295	0.00559	0.16452	2.11e-15
SP4	0.0259258	0.0807	0.058685	9e-06
SPI1	0.00379267	0.756	-0.0435677	0.000101
SREBF1	0.0362276	0.12	0.160915	4.83e-07
SREBF2	0.0752736	0.0289	0.129103	0.00217
SRF	0.0675561	0.0201	-0.0407541	0.178
STAT1	-0.460354	0.000108	-0.280247	2.93e-13
STAT2	-0.0989246	0.0209	-0.242085	1.75e-10
STAT3	-0.11675	4.61e-05	-0.403787	2.32e-62
STAT5A	0.132272	4.12e-05	0.0595299	0.0546
SUPT20H	-0.0501176	0.399	-0.210505	2.67e-05
SUZ12	0.561924	1.79e-61	-0.0522324	0.0735
TAF1	0.181367	8.86e-24	0.064674	1.4e-10
TAF7	0.168633	1.92e-07	0.154333	8.84e-08
TAL1	0.0120963	0.448	-0.0264482	0.0712
TBL1XR1	0.0769013	1.49e-05	0.073288	0.011
TBP	0.248098	4.95e-15	0.211075	8.01e-06
TCF12	-0.128012	0.000171	-0.383077	2.9e-36
TCF3	0.0780171	1.17e-05	0.0489831	0.00578
TCF7L2	0.29261	1.75e-06	-0.0961153	3.31e-11
TEAD4	-0.246189	1.47e-27	-0.083879	4.26e-05
THAP1	0.108803	1.13e-06	0.0563963	0.00322
TRIM28	0.239695	0.000351	-0.214061	0.0107
UBTF	0.108571	9.21e-06	0.0743661	0.0721
USF1	0.101843	1e-16	0.0438425	0.000407
USF2	0.0940292	3.71e-08	-0.0547427	0.00142
WRNIP1	0.080603	0.000382	0.00185374	0.929
XRCC4	0.0026986	0.969	0.0340273	0.578
YY1	0.0796552	1.16e-13	0.0760102	7.64e-12
ZBTB33	0.103946	6.34e-07	0.0529476	0.00391
ZBTB7A	-0.0557549	0.00485	0.0497052	0.00177
ZEB1	0.0289372	0.169	0.0300461	0.112
ZKSCAN1	0.125287	8.72e-06	-0.0480487	0.102
ZMIZ1	0.0064596	0.928	0.0553828	0.37
ZNF143	0.0418802	0.00118	0.0710976	9.02e-06
ZNF217	-0.0603108	0.048	-0.293658	1.18e-10
ZNF263	0.176094	3.51e-05	0.233101	1.68e-09
ZNF274	-0.207044	9.65e-08	0.0601768	0.0391
ZNF384	0.157778	0.00989	0.182697	0.00621
ZZZ3	0.0378791	0.444	-0.15125	0.00226
