# Supplementary material for: Transcription Elongation Machinery Is a Druggable Dependency and Potentiates Immunotherapy in Glioblastoma Stem Cells
Source: Oxford University Press journal article supplement (doi:10.1158/2159-8290.cd-20-1848), 2022-01-13
Supplement: 21598290cd201848-sup-257762_2_supp_7373640_qyxwb0.xlsx [file 21598290cd201848-sup-257762_2_supp_7373640_qyxwb0.xlsx]

## Sheet: Sheet1
Supplementary Table S2. Annotation of ChIP-seq peaks for YY1.
Chr	start	end	width	score	signalValue	pValue	qValue	annotation	geneChr	geneStart	geneEnd	geneId	distanceToTSS	ENSEMBL	SYMBOL	GENENAME
chr1	231185	231565	381	79	6.31282	11.3568	7.92535	Distal Intergenic	1	322037	326938	100133331	-90472	NA	LOC100133331	uncharacterized LOC100133331
chr1	566069	566537	469	787	14.8125	82.9439	78.7998	Exon (uc021oej.1/uc021oej.1, exon 1 of 1)	1	621096	622034	729759	55497	ENSG00000284733	OR4F29	olfactory receptor family 4 subfamily F member 29
chr1	894360	894796	437	892	11.0366	93.4584	89.2537	Promoter (<=1kb)	1	879583	894679	26155	0	ENSG00000188976	NOC2L	NOC2 like nucleolar associated transcriptional repressor
chr1	1167023	1167810	788	5828	50.0262	588.532	582.819	Promoter (<=1kb)	1	1167629	1170420	126792	0	ENSG00000176022	B3GALT6	beta-1,3-galactosyltransferase 6
chr1	1184492	1184865	374	71	3.14483	10.5101	7.10441	Promoter (2-3kb)	1	1177826	1182102	388581	-2390	ENSG00000184163	C1QTNF12	C1q and TNF related 12
chr1	1208821	1209448	628	2182	27.7498	223.082	218.222	Promoter (<=1kb)	1	1189292	1209234	118424	0	ENSG00000160087	UBE2J2	ubiquitin conjugating enzyme E2 J2
chr1	1334205	1334977	773	1983	21.9651	203.122	198.347	Promoter (<=1kb)	1	1334910	1337426	148413	0	ENSG00000224870	LOC148413	uncharacterized LOC148413
chr1	1342170	1342905	736	1319	18.0705	136.4	131.942	Promoter (<=1kb)	1	1337276	1342693	55052	0	ENSG00000242485	MRPL20	mitochondrial ribosomal protein L20
chr1	1509705	1510329	625	2614	25.1579	266.431	261.417	Promoter (<=1kb)	1	1477053	1510262	29101	0	ENSG00000160075	SSU72	SSU72 homolog, RNA polymerase II CTD phosphatase
chr1	1709599	1709992	394	229	7.3032	26.6785	22.9769	Promoter (<=1kb)	1	1682671	1709909	65220	0	ENSG00000008130	NADK	NAD kinase
chr1	1821333	1821714	382	962	16.1255	100.535	96.2891	Promoter (<=1kb)	1	1716725	1822526	2782	812	ENSG00000078369	GNB1	G protein subunit beta 1
chr1	2222273	2222672	400	1227	16.1844	127.112	122.708	Intron (uc001aja.4/6497, intron 1 of 6)	1	2281853	2284100	100129534	61428	ENSG00000269896	LOC100129534	small nuclear ribonucleoprotein polypeptide N pseudogene
chr1	2322592	2323460	869	1684	22.8651	173.127	168.48	Promoter (<=1kb)	1	2323214	2336885	11079	0	ENSG00000157916	RER1	retention in endoplasmic reticulum sorting receptor 1
chr1	2343751	2344137	387	177	4.77107	21.3572	17.7302	Promoter (<=1kb)	1	2336241	2344010	5192	0	ENSG00000157911	PEX10	peroxisomal biogenesis factor 10
chr1	2457753	2458276	524	538	9.53943	57.8571	53.8778	Promoter (<=1kb)	1	2439975	2458035	55229	0	ENSG00000157881	PANK4	pantothenate kinase 4
chr1	2517720	2518463	744	2751	31.5872	280.18	275.123	Promoter (<=1kb)	1	2517899	2522908	127281	0	ENSG00000157870	FAM213B	family with sequence similarity 213 member B
chr1	3566430	3566689	260	153	4.4557	18.9781	15.388	Promoter (<=1kb)	1	3547331	3566671	49856	0	ENSG00000116213	WRAP73	WD repeat containing, antisense to TP73
chr1	3712762	3713250	489	464	8.70115	50.3964	46.4719	Promoter (<=1kb)	1	3696784	3713068	57470	0	ENSG00000130764	LRRC47	leucine rich repeat containing 47
chr1	3816829	3818141	1313	10121	59.9245	1018.5	1012.19	Promoter (<=1kb)	1	3816968	3832011	100133612	0	ENSG00000236423	LINC01134	long intergenic non-protein coding RNA 1134
chr1	4712696	4712944	249	140	4.85194	17.6017	14.0355	Promoter (2-3kb)	1	4715105	4837854	55966	-2161	ENSG00000196581	AJAP1	adherens junctions associated protein 1
chr1	6259474	6259735	262	97	6.46868	13.2561	9.77802	Promoter (<=1kb)	1	6245080	6259679	6146	0	ENSG00000116251	RPL22	ribosomal protein L22
chr1	6295763	6296149	387	71	5.25208	10.5758	7.16794	Promoter (<=1kb)	1	6281253	6296044	23463	0	ENSG00000116237	ICMT	isoprenylcysteine carboxyl methyltransferase
chr1	6614372	6614732	361	285	11.7052	32.3118	28.5466	Promoter (<=1kb)	1	6581407	6614658	79707	0	ENSG00000162408	NOL9	nucleolar protein 9
chr1	6684999	6685546	548	875	24.6426	91.699	87.5039	Promoter (<=1kb)	1	6685210	6693642	90326	0	ENSG00000041988	THAP3	THAP domain containing 3
chr1	6761675	6762041	367	173	7.55215	20.9468	17.3253	Promoter (<=1kb)	1	6694228	6761966	55735	0	ENSG00000007923	DNAJC11	DnaJ heat shock protein family (Hsp40) member C11
chr1	8938070	8938339	270	134	7.5442	17.047	13.4901	Promoter (<=1kb)	1	8938894	8939943	100505975	-555	ENSG00000230679	ENO1-AS1	ENO1 antisense RNA 1
chr1	9599650	9599862	213	60	5.57014	9.37392	6.00505	Promoter (<=1kb)	1	9599528	9642831	84275	122	ENSG00000171612	SLC25A33	solute carrier family 25 member 33
chr1	9883796	9884251	456	708	21.2542	74.942	70.8474	Promoter (<=1kb)	1	9789079	9884550	22883	299	ENSG00000171603	CLSTN1	calsyntenin 1
chr1	9970404	9970830	427	80	4.73345	11.5129	8.07759	Promoter (<=1kb)	1	9908334	9970316	56998	-88	ENSG00000178585	CTNNBIP1	catenin beta interacting protein 1
chr1	10092809	10093268	460	957	12.6099	99.9627	95.7203	Promoter (<=1kb)	1	10093041	10241296	10277	0	ENSG00000130939	UBE4B	ubiquitination factor E4B
chr1	10534865	10535287	423	1253	15.5223	129.757	125.337	Promoter (<=1kb)	1	10535003	10580067	5195	0	ENSG00000142655	PEX14	peroxisomal biogenesis factor 14
chr1	11072514	11073134	621	990	9.96085	103.315	99.0529	Promoter (<=1kb)	1	11072679	11085549	23435	0	ENSG00000120948	TARDBP	TAR DNA binding protein
chr1	11159654	11160093	440	1157	13.3671	120.08	115.719	Promoter (<=1kb)	1	11126676	11159938	5394	0	ENSG00000171824	EXOSC10	exosome component 10
chr1	11333162	11333558	397	965	13.5823	100.749	96.5019	Promoter (<=1kb)	1	11333255	11348491	29914	0	ENSG00000120942	UBIAD1	UbiA prenyltransferase domain containing 1
chr1	11865865	11866363	499	736	8.90978	77.7792	73.6673	Promoter (<=1kb)	1	11866153	11876844	1185	0	ENSG00000011021	CLCN6	chloride voltage-gated channel 6
chr1	12040289	12040820	532	1960	24.6623	200.794	196.029	Promoter (<=1kb)	1	12040238	12073572	9927	51	ENSG00000116688	MFN2	mitofusin 2
chr1	12289937	12290392	456	666	13.5147	70.6783	66.6116	Promoter (<=1kb)	1	12290113	12572098	55187	0	ENSG00000048707	VPS13D	vacuolar protein sorting 13 homolog D
chr1	14026481	14027010	530	2065	28.8412	211.388	206.578	Promoter (<=1kb)	1	14026735	14151574	7799	0	ENSG00000116731	PRDM2	PR/SET domain 2
chr1	16161224	16161781	558	8452	58.309	851.375	845.279	Exon (uc001axj.2/729614, exon 2 of 2)	1	16174359	16266950	23013	-12578	ENSG00000065526	SPEN	spen family transcriptional repressor
chr1	16302315	16302792	478	3254	28.8227	330.658	325.46	Promoter (<=1kb)	1	16268364	16302627	7709	0	ENSG00000116809	ZBTB17	zinc finger and BTB domain containing 17
chr1	16678621	16679170	550	1077	15.8051	112.063	107.748	Promoter (<=1kb)	1	16576559	16678948	54455	0	ENSG00000037637	FBXO42	F-box protein 42
chr1	16693362	16694184	823	5759	58.7238	581.65	575.951	Promoter (<=1kb)	1	16693525	16722607	26099	0	ENSG00000055070	SZRD1	SUZ RNA binding domain containing 1
chr1	16886741	16887194	454	50	5.1988	8.42311	5.09023	Downstream (1-2kb)	1	16875409	16875482	100500876	11332	ENSG00000263811	MIR3675	microRNA 3675
chr1	16888780	16889088	309	25	4.08477	5.75617	2.55965	3' UTR	1	16875409	16875482	100500876	13371	ENSG00000263811	MIR3675	microRNA 3675
chr1	16891063	16892188	1126	83	5.4891	11.7747	8.33297	Exon (uc001ayw.4/55672, exon 27 of 29)	1	16875409	16875482	100500876	15654	ENSG00000263811	MIR3675	microRNA 3675
chr1	16892419	16893853	1435	102	6.98662	13.7524	10.2624	3' UTR	1	16875409	16875482	100500876	17010	ENSG00000263811	MIR3675	microRNA 3675
chr1	16922390	16922783	394	57	5.43775	9.15291	5.79512	Intron (uc001ayw.4/55672, intron 2 of 28)	1	16893674	16918808	55672	-3582	ENSG00000219481	NBPF1	NBPF member 1
chr1	17380298	17380737	440	1696	16.1799	174.329	169.677	Promoter (<=1kb)	1	17345225	17380665	6390	0	ENSG00000117118	SDHB	succinate dehydrogenase complex iron sulfur subunit B
chr1	19536526	19536937	412	518	8.01173	55.8551	51.8903	Promoter (<=1kb)	1	19401000	19536746	23352	0	ENSG00000127481	UBR4	ubiquitin protein ligase E3 component n-recognin 4
chr1	19577809	19578211	403	973	18.0034	101.634	97.3819	Promoter (<=1kb)	1	19542158	19578053	23065	0	ENSG00000127463	EMC1	ER membrane protein complex subunit 1
chr1	20208636	20209446	811	754	15.1955	79.5278	75.4046	Promoter (<=1kb)	1	20208888	20239437	23252	0	ENSG00000169914	OTUD3	OTU deubiquitinase 3
chr1	20959944	20960245	302	37	3.46854	7.01457	3.74827	Promoter (<=1kb)	1	20959948	20978004	65018	0	ENSG00000158828	PINK1	PTEN induced putative kinase 1
chr1	21112954	21113413	460	1227	13.8812	127.129	122.725	Promoter (<=1kb)	1	21069171	21113124	50809	0	ENSG00000127483	HP1BP3	heterochromatin protein 1 binding protein 3
chr1	21503090	21503568	479	534	6.99116	57.4423	53.4663	Promoter (<=1kb)	1	21132785	21503381	8672	0	ENSG00000075151	EIF4G3	eukaryotic translation initiation factor 4 gamma 3
chr1	22379506	22379954	449	431	9.30324	47.0118	43.114	Promoter (<=1kb)	1	22379120	22419436	998	386	ENSG00000070831	CDC42	cell division cycle 42
chr1	22778134	22778599	466	1940	19.8731	198.85	194.095	Promoter (<=1kb)	1	22778344	22857650	9923	0	ENSG00000184677	ZBTB40	zinc finger and BTB domain containing 40
chr1	23494299	23494547	249	77	3.7139	11.1648	7.74052	Promoter (<=1kb)	1	23410516	23495517	7798	970	ENSG00000169641	LUZP1	leucine zipper protein 1
chr1	23670613	23671415	803	330	6.42648	36.8494	33.0396	Promoter (<=1kb)	1	23636276	23670853	10236	0	ENSG00000125944	HNRNPR	heterogeneous nuclear ribonucleoprotein R
chr1	23857225	23857555	331	192	5.04102	22.8943	19.2437	Promoter (<=1kb)	1	23832920	23857712	1870	157	ENSG00000007968	E2F2	E2F transcription factor 2
chr1	23885901	23886242	342	593	8.04779	63.4029	59.3851	Promoter (<=1kb)	1	23884421	23886285	3399	43	ENSG00000117318	ID3	inhibitor of DNA binding 3, HLH protein
chr1	24069774	24070412	639	796	15.3438	83.8428	79.6942	Promoter (<=1kb)	1	24069856	24088549	6924	0	ENSG00000011007	ELOA	elongin A
chr1	24117370	24117734	365	655	12.5389	69.6503	65.5898	Promoter (<=1kb)	1	24117646	24122029	11313	0	ENSG00000011009	LYPLA2	lysophospholipase II
chr1	24151695	24152105	411	935	11.3636	97.8108	93.5805	Promoter (<=1kb)	1	24128367	24151949	3155	0	ENSG00000117305	HMGCL	3-hydroxymethyl-3-methylglutaryl-CoA lyase
chr1	24286316	24286778	463	1260	32.0354	130.424	126.001	Promoter (<=1kb)	1	24286301	24289949	55629	15	ENSG00000189266	PNRC2	proline rich nuclear receptor coactivator 2
chr1	24306377	24306785	409	358	9.57977	39.7145	35.879	Promoter (<=1kb)	1	24292937	24306953	10772	168	ENSG00000188529	SRSF10	serine and arginine rich splicing factor 10
chr1	24969585	24970215	631	377	7.72864	41.6223	37.7707	Promoter (<=1kb)	1	24969594	24999772	10250	0	ENSG00000133226	SRRM1	serine and arginine repetitive matrix 1
chr1	25558722	25558971	250	32	2.74953	6.51286	3.28039	Promoter (<=1kb)	1	25548767	25559013	25949	42	ENSG00000117614	SYF2	SYF2 pre-mRNA splicing factor
chr1	25870023	25870256	234	55	4.0372	8.90686	5.5569	Promoter (<=1kb)	1	25870076	25895377	26119	0	ENSG00000157978	LDLRAP1	low density lipoprotein receptor adaptor protein 1
chr1	26185723	26186134	412	172	5.68532	20.8224	17.2028	Promoter (<=1kb)	1	26160497	26185848	79000	0	ENSG00000127423	AUNIP	aurora kinase A and ninein interacting protein
chr1	26324671	26324918	248	29	3.06508	6.20203	2.98177	Promoter (<=1kb)	1	26286258	26324648	5051	-23	ENSG00000158006	PAFAH2	platelet activating factor acetylhydrolase 2
chr1	26438119	26438611	493	1276	13.4442	132.097	127.663	Promoter (<=1kb)	1	26438268	26452039	149420	0	ENSG00000175087	PDIK1L	PDLIM1 interacting kinase 1 like
chr1	26632887	26633237	351	197	5.5178	23.3632	19.7054	Promoter (<=1kb)	1	26608773	26633195	91544	0	ENSG00000158062	UBXN11	UBX domain protein 11
chr1	26799080	26799535	456	1231	14.8761	127.537	123.131	Promoter (<=1kb)	1	26798902	26803133	3151	178	ENSG00000198830	HMGN2	high mobility group nucleosomal binding domain 2
chr1	27022003	27022434	432	857	14.2133	89.9534	85.7683	Promoter (<=1kb)	1	27022522	27102198	8289	-88	ENSG00000117713	ARID1A	AT-rich interaction domain 1A
chr1	27022695	27024244	1550	534	9.44393	57.4622	53.4859	Promoter (<=1kb)	1	27022522	27108601	8289	173	ENSG00000117713	ARID1A	AT-rich interaction domain 1A
chr1	27114086	27114761	676	3057	32.5268	310.872	305.724	Promoter (<=1kb)	1	27114454	27124894	55650	0	ENSG00000060642	PIGV	phosphatidylinositol glycan anchor biosynthesis class V
chr1	27226685	27227066	382	322	7.58959	36.023	32.2209	Promoter (<=1kb)	1	27216979	27226956	63906	0	ENSG00000198746	GPATCH3	G-patch domain containing 3
chr1	27648508	27649019	512	315	8.13284	35.3073	31.5115	Promoter (<=1kb)	1	27648636	27662891	84065	0	ENSG00000186501	TMEM222	transmembrane protein 222
chr1	27816390	27816868	479	1461	16.592	150.694	146.159	Promoter (<=1kb)	1	27730734	27816678	10163	0	ENSG00000158195	WASF2	WAS protein family member 2
chr1	28052465	28052689	225	80	3.88516	11.4901	8.05585	Promoter (<=1kb)	1	28052490	28086275	199870	0	ENSG00000009780	FAM76A	family with sequence similarity 76 member A
chr1	28157113	28157650	538	2039	22.3895	208.705	203.906	Promoter (<=1kb)	1	28157252	28178183	5511	0	ENSG00000117751	PPP1R8	protein phosphatase 1 regulatory subunit 8
chr1	28180870	28181172	303	49	3.79887	8.32163	4.99726	Distal Intergenic	1	28167525	28178179	5511	13345	ENSG00000117751	PPP1R8	protein phosphatase 1 regulatory subunit 8
chr1	28240986	28241423	438	835	9.60046	87.7726	83.5998	Promoter (<=1kb)	1	28218049	28241236	6118	0	ENSG00000117748	RPA2	replication protein A2
chr1	28559292	28559674	383	489	9.63758	52.9146	48.9717	Promoter (<=1kb)	1	28526790	28559542	22826	0	ENSG00000126698	DNAJC8	DnaJ heat shock protein family (Hsp40) member C8
chr1	28695941	28696299	359	689	9.99203	73.0735	68.991	Promoter (<=1kb)	1	28696093	28793725	65979	0	ENSG00000204138	PHACTR4	phosphatase and actin regulator 4
chr1	28879461	28879814	354	371	8.09872	40.9914	37.1438	Promoter (<=1kb)	1	28879529	28905057	54952	0	ENSG00000180098	TRNAU1AP	tRNA selenocysteine 1 associated protein 1
chr1	29063496	29063825	330	94	3.5971	12.9587	9.48713	Promoter (<=1kb)	1	29063462	29096287	51441	34	ENSG00000198492	YTHDF2	YTH N6-methyladenosine RNA binding protein 2
chr1	29507837	29508357	521	271	5.54962	30.887	27.1363	Promoter (<=1kb)	1	29474250	29508637	6429	280	ENSG00000116350	SRSF4	serine and arginine rich splicing factor 4
chr1	31538454	31538770	317	707	9.85394	74.8173	70.7234	Promoter (<=1kb)	1	31404353	31538564	9698	0	ENSG00000134644	PUM1	pumilio RNA binding family member 1
chr1	31769390	31769705	316	208	5.50791	24.4852	20.8126	Promoter (<=1kb)	1	31732415	31769644	9410	0	ENSG00000060688	SNRNP40	small nuclear ribonucleoprotein U5 subunit 40
chr1	32403310	32403801	492	337	10.3423	37.543	33.726	Promoter (<=1kb)	1	32372022	32403988	8073	187	ENSG00000184007	PTP4A2	protein tyrosine phosphatase type IVA, member 2
chr1	32573580	32573823	244	112	4.34122	14.8003	11.2869	Promoter (<=1kb)	1	32573644	32642168	23633	0	ENSG00000025800	KPNA6	karyopherin subunit alpha 6
chr1	32757531	32757990	460	370	7.20567	40.8936	37.0469	Promoter (<=1kb)	1	32757708	32793590	3065	0	ENSG00000116478	HDAC1	histone deacetylase 1
chr1	32859766	32860235	470	539	7.45935	57.9173	53.9371	Promoter (<=1kb)	1	32830705	32860062	55108	0	ENSG00000160058	BSDC1	BSD domain containing 1
chr1	32930352	32930715	364	434	8.11164	47.3778	43.4773	Promoter (<=1kb)	1	32930658	33071542	653121	0	ENSG00000160062	ZBTB8A	zinc finger and BTB domain containing 8A
chr1	32965977	32966565	589	715	12.4663	75.65	71.5512	Intron (uc001bvk.3/653121, intron 4 of 9)	1	32930658	32953459	728116	35319	ENSG00000273274	ZBTB8B	zinc finger and BTB domain containing 8B
chr1	33116334	33117104	771	920	12.7182	96.249	92.0276	Promoter (<=1kb)	1	33116749	33151812	5928	0	ENSG00000162521	RBBP4	RB binding protein 4, chromatin remodeling factor
chr1	33283000	33283436	437	1157	13.3671	120.08	115.719	Promoter (<=1kb)	1	33283043	33324480	64766	0	ENSG00000116497	S100PBP	S100P binding protein
chr1	33430261	33430751	491	750	13.0504	79.1818	75.0611	Promoter (<=1kb)	1	33402050	33430286	127544	0	ENSG00000116514	RNF19B	ring finger protein 19B
chr1	33646746	33647162	417	104	4.88316	13.9271	10.4325	Promoter (<=1kb)	1	33611003	33647671	55223	509	ENSG00000116525	TRIM62	tripartite motif containing 62
chr1	35450735	35451068	334	232	6.3849	26.98	23.2746	Promoter (<=1kb)	1	35447127	35450948	100506144	0	ENSG00000243749	TMEM35B	transmembrane protein 35B
chr1	35657457	35658846	1390	4339	42.044	439.392	433.948	Promoter (<=1kb)	1	35649201	35658743	6421	0	ENSG00000116560	SFPQ	splicing factor proline and glutamine rich
chr1	35734108	35734798	691	352	8.30087	39.0599	35.2296	Promoter (<=1kb)	1	35734568	35887545	9202	0	ENSG00000146463	ZMYM4	zinc finger MYM-type containing 4
chr1	36022969	36023601	633	2753	17.9851	280.403	275.345	Promoter (<=1kb)	1	36023393	36032380	23154	0	ENSG00000020129	NCDN	neurochondrin
chr1	36273847	36274220	374	214	7.08984	25.1059	21.4247	Promoter (<=1kb)	1	36273828	36323490	192670	19	ENSG00000134698	AGO4	argonaute 4, RISC catalytic component
chr1	36554294	36554739	446	1132	15.9932	117.556	113.209	Promoter (<=1kb)	1	36554453	36559533	54936	0	ENSG00000116863	ADPRHL2	ADP-ribosylhydrolase like 2
chr1	36626561	36626808	248	111	4.07689	14.6872	11.1761	Intron (uc001bzz.3/55700, intron 1 of 16)	1	36621803	36646441	55700	4758	ENSG00000116871	MAP7D1	MAP7 domain containing 1
chr1	36689643	36689958	316	296	5.25585	33.4536	29.6769	Promoter (<=1kb)	1	36690017	36770957	9967	-59	ENSG00000054118	THRAP3	thyroid hormone receptor associated protein 3
chr1	36851028	36851934	907	3137	34.8896	318.906	313.739	Promoter (<=1kb)	1	36805225	36851485	83931	0	ENSG00000196182	STK40	serine/threonine kinase 40
chr1	36929708	36930193	486	3435	27.9338	348.817	343.572	Promoter (<=1kb)	1	36921362	36930040	64960	0	ENSG00000116898	MRPS15	mitochondrial ribosomal protein S15
chr1	37980112	37980498	387	566	9.36927	60.6522	56.653	Promoter (<=1kb)	1	37955561	37980420	64769	0	ENSG00000163875	MEAF6	MYST/Esa1 associated factor 6
chr1	38022366	38022701	336	226	6.09313	26.351	22.6539	Promoter (<=1kb)	1	38022520	38032458	7802	0	ENSG00000163879	DNALI1	dynein axonemal light intermediate chain 1
chr1	38259576	38260003	428	476	9.13969	51.5939	47.6604	Promoter (<=1kb)	1	38259774	38267278	149175	0	ENSG00000185090	MANEAL	mannosidase endo-alpha like
chr1	38397265	38397569	305	122	5.04797	15.8026	12.2693	Promoter (<=1kb)	1	38326369	38397421	3633	0	ENSG00000204084	INPP5B	inositol polyphosphate-5-phosphatase B
chr1	39269687	39270059	373	196	7.9293	23.2998	19.6436	Distal Intergenic	1	39303869	39325495	64121	55436	ENSG00000116954	RRAGC	Ras related GTP binding C
chr1	39456760	39457206	447	860	12.6273	90.2362	86.0491	Promoter (<=1kb)	1	39456916	39471737	79647	0	ENSG00000174574	AKIRIN1	akirin 1
chr1	39571156	39571416	261	157	5.14213	19.3426	15.7459	Intron (uc001cdc.2/23499, intron 1 of 61)	1	39587985	39901433	23499	-16569	ENSG00000127603	MACF1	microtubule-actin crosslinking factor 1
chr1	40204384	40204789	406	1215	17.1067	125.98	121.583	Promoter (<=1kb)	1	40204517	40222441	10450	0	ENSG00000084072	PPIE	peptidylprolyl isomerase E
chr1	40348908	40349328	421	1049	16.1008	109.213	104.916	Promoter (<=1kb)	1	40306706	40349177	54802	0	ENSG00000043514	TRIT1	tRNA isopentenyltransferase 1
chr1	40562668	40563156	489	1507	16.3833	155.33	150.772	Promoter (<=1kb)	1	40538382	40563142	5538	0	ENSG00000131238	PPT1	palmitoyl-protein thioesterase 1
chr1	40626850	40627432	583	783	9.92679	82.4595	78.319	Promoter (<=1kb)	1	40627041	40706593	6018	0	ENSG00000117000	RLF	rearranged L-myc fusion
chr1	41157225	41157919	695	808	9.6286	84.9705	80.8149	Promoter (<=1kb)	1	41157242	41232915	4802	0	ENSG00000066136	NFYC	nuclear transcription factor Y subunit gamma
chr1	41327651	41327945	295	215	6.51912	25.2214	21.539	Promoter (<=1kb)	1	41326728	41328018	163732	73	ENSG00000179862	CITED4	Cbp/p300 interacting transactivator with Glu/Asp rich carboxy-terminal domain 4
chr1	41707559	41707897	339	215	6.14396	25.2639	21.5805	Promoter (<=1kb)	1	41492871	41707815	22955	0	ENSG00000010803	SCMH1	Scm polycomb group protein homolog 1
chr1	41827268	41827519	252	28	2.93903	6.04867	2.83734	Distal Intergenic	1	41492871	41707815	22955	-119453	ENSG00000010803	SCMH1	Scm polycomb group protein homolog 1
chr1	43232475	43233174	700	122	4.14084	15.81	12.2762	Promoter (<=1kb)	1	43212006	43232755	64175	0	ENSG00000117385	P3H1	prolyl 3-hydroxylase 1
chr1	43282616	43283118	503	678	11.6609	71.9475	67.8721	Promoter (<=1kb)	1	43282776	43305384	114625	0	ENSG00000164010	ERMAP	erythroblast membrane associated protein (Scianna blood group)
chr1	44172995	44173547	553	2788	24.9351	283.959	278.891	Promoter (<=1kb)	1	44165356	44173012	100132774	0	NA	KDM4A-AS1	KDM4A antisense RNA 1
chr1	44440583	44440896	314	88	3.95678	12.279	8.82536	Promoter (<=1kb)	1	44440602	44443972	533	0	ENSG00000117410	ATP6V0B	ATPase H+ transporting V0 subunit b
chr1	44820907	44821223	317	334	8.76659	37.2999	33.4849	Promoter (<=1kb)	1	44686742	44820939	79033	0	ENSG00000117419	ERI3	ERI1 exoribonuclease family member 3
chr1	45097382	45097984	603	2623	24.7458	267.382	262.366	Promoter (<=1kb)	1	45097704	45117395	55182	0	ENSG00000187147	RNF220	ring finger protein 220
chr1	45190184	45190389	206	41	3.54492	7.43854	4.15552	Exon (uc001cmf.2/339541, exon 9 of 12)	1	45205490	45233438	11004	-15101	ENSG00000142945	KIF2C	kinesin family member 2C
chr1	45241282	45241721	440	566	7.66655	60.6541	56.6549	Promoter (<=1kb)	1	45241537	45241610	26811	0	ENSG00000264294	SNORD55	small nucleolar RNA, C/D box 55
chr1	45671747	45672333	587	787	14.8125	82.9439	78.7998	Promoter (<=1kb)	1	45482076	45672250	57643	0	ENSG00000162415	ZSWIM5	zinc finger SWIM-type containing 5
chr1	45805697	45806120	424	428	6.44944	46.7188	42.8235	Promoter (<=1kb)	1	45805884	45808674	114034	0	ENSG00000132773	TOE1	target of EGR1, exonuclease
chr1	46049825	46050400	576	1563	15.7782	160.949	156.363	Promoter (<=1kb)	1	46049660	46084578	4678	165	ENSG00000132780	NASP	nuclear autoantigenic sperm protein
chr1	46151770	46152402	633	1296	12.5704	134.046	129.602	Promoter (<=1kb)	1	46092976	46152302	60313	0	ENSG00000159592	GPBP1L1	GC-rich promoter binding protein 1 like 1
chr1	46598266	46598513	248	170	4.77097	20.6823	17.0645	Promoter (<=1kb)	1	46505812	46598380	8503	0	ENSG00000117461	PIK3R3	phosphoinositide-3-kinase regulatory subunit 3
chr1	46663910	46664171	262	58	3.30474	9.24221	5.88165	Promoter (<=1kb)	1	46654353	46664121	55624	0	ENSG00000085998	POMGNT1	protein O-linked mannose N-acetylglucosaminyltransferase 1 (beta 1,2-)
chr1	46768643	46769277	635	9663	72.8072	972.625	966.395	Promoter (<=1kb)	1	46744072	46769038	10489	0	ENSG00000132128	LRRC41	leucine rich repeat containing 41
chr1	47133777	47134176	400	384	8.44265	42.259	38.4009	Promoter (<=1kb)	1	47100711	47134099	64756	0	ENSG00000123472	ATPAF1	ATP synthase mitochondrial F1 complex assembly factor 1
chr1	48462660	48463010	351	25	3.05198	5.77606	2.57887	Promoter (<=1kb)	1	48226200	48462562	388630	-98	ENSG00000269113	TRABD2B	TraB domain containing 2B
chr1	50886812	50887056	245	74	3.9613	10.9175	7.49975	Promoter (<=1kb)	1	50883223	50887304	63950	248	ENSG00000142700	DMRTA2	DMRT like family A2
chr1	51425365	51425871	507	181	6.91812	21.821	18.186	Promoter (<=1kb)	1	50906935	51425525	11124	0	ENSG00000185104	FAF1	Fas associated factor 1
chr1	52082565	52082984	420	655	13.8741	69.5804	65.5208	Promoter (<=1kb)	1	52082546	52254891	114883	19	ENSG00000117859	OSBPL9	oxysterol binding protein like 9
chr1	52521812	52522216	405	772	8.59974	81.3882	77.2544	Promoter (<=1kb)	1	52485804	52521843	51060	0	ENSG00000117862	TXNDC12	thioredoxin domain containing 12
chr1	52870107	52870357	251	76	3.2197	11.0556	7.63463	Promoter (<=1kb)	1	52838501	52870143	4998	0	ENSG00000085840	ORC1	origin recognition complex subunit 1
chr1	53018549	53018895	347	175	5.6665	21.1565	17.5317	Promoter (<=1kb)	1	52888948	53018762	23318	0	ENSG00000134744	ZCCHC11	zinc finger CCHC-type containing 11
chr1	53163793	53164151	359	151	4.88113	18.7398	15.1538	Promoter (<=1kb)	1	53152014	53164038	65260	0	ENSG00000162377	COA7	cytochrome c oxidase assembly factor 7 (putative)
chr1	53793011	53793405	395	218	5.98029	25.5129	21.827	Promoter (<=1kb)	1	53708041	53793071	7804	0	ENSG00000157193	LRP8	LDL receptor related protein 8
chr1	54303771	54304010	240	59	3.39557	9.33546	5.97119	Promoter (<=1kb)	1	54231134	54304225	55706	215	ENSG00000058804	NDC1	NDC1 transmembrane nucleoporin
chr1	54518636	54519148	513	1365	16.4236	141.013	136.528	Promoter (<=1kb)	1	54497349	54519111	9528	0	ENSG00000116209	TMEM59	transmembrane protein 59
chr1	54665736	54666120	385	388	8.12417	42.6721	38.8104	Promoter (<=1kb)	1	54665840	54684056	51253	0	ENSG00000116221	MRPL37	mitochondrial ribosomal protein L37
chr1	54872025	54872283	259	69	4.95362	10.327	6.93006	Promoter (<=1kb)	1	54691104	54872068	23648	0	ENSG00000157216	SSBP3	single stranded DNA binding protein 3
chr1	55680617	55681295	679	1902	22.2286	194.972	190.232	Promoter (<=1kb)	1	55681081	55683128	100507634	0	NA	LOC100507634	uncharacterized LOC100507634
chr1	59012349	59012573	225	131	4.36133	16.7144	13.1641	Promoter (<=1kb)	1	58946391	59012446	115209	0	ENSG00000162600	OMA1	OMA1 zinc metallopeptidase
chr1	59165516	59165887	372	427	7.19421	46.6474	42.7525	Promoter (<=1kb)	1	59120411	59165747	114803	0	ENSG00000162601	MYSM1	Myb like, SWIRM and MPN domains 1
chr1	59369326	59369665	340	84	4.62471	11.8939	8.44923	Distal Intergenic	1	59250823	59365384	100131060	118503	ENSG00000234807	LINC01135	long intergenic non-protein coding RNA 1135
chr1	61649757	61650101	345	248	8.19251	28.6211	24.8958	Intron (uc001czy.3/4774, intron 2 of 10)	1	61547980	61928460	4774	101777	ENSG00000162599	NFIA	nuclear factor I A
chr1	62190556	62190976	421	1121	10.5232	116.486	112.145	Promoter (<=1kb)	1	62146719	62191095	83941	119	ENSG00000162604	TM2D1	TM2 domain containing 1
chr1	62901753	62902131	379	696	8.26834	73.7785	69.6915	Promoter (<=1kb)	1	62901975	62917475	7398	0	ENSG00000162607	USP1	ubiquitin specific peptidase 1
chr1	65210523	65211018	496	353	7.50292	39.1978	35.366	Promoter (<=1kb)	1	65210778	65298914	55225	0	ENSG00000162437	RAVER2	ribonucleoprotein, PTB binding 2
chr1	65886260	65886617	358	304	7.10865	34.2349	30.4496	Promoter (<=1kb)	1	65886131	65901690	54741	129	ENSG00000213625	LEPROT	leptin receptor overlapping transcript
chr1	67395809	67396309	501	360	8.07147	39.8374	36.0001	Promoter (<=1kb)	1	67395926	67454302	57708	0	ENSG00000198160	MIER1	MIER1 transcriptional regulator
chr1	67519456	67519864	409	324	6.90992	36.2813	32.476	Promoter (<=1kb)	1	67465015	67520080	23169	216	ENSG00000116704	SLC35D1	solute carrier family 35 member D1
chr1	67895808	67896300	493	1465	15.1242	151.131	146.594	Promoter (<=1kb)	1	67873493	67896123	26135	0	ENSG00000142864	SERBP1	SERPINE1 mRNA binding protein 1
chr1	68962643	68962898	256	112	4.92739	14.7434	11.2306	Promoter (<=1kb)	1	68939835	68962799	55635	0	ENSG00000024526	DEPDC1	DEP domain containing 1
chr1	70820188	70820601	414	148	4.62833	18.4264	14.8447	Promoter (<=1kb)	1	70820493	70833705	11147	0	ENSG00000197568	HHLA3	HERV-H LTR-associating 3
chr1	74663744	74664021	278	45	3.3595	7.86547	4.55767	Promoter (<=1kb)	1	74663896	74837776	100526835	0	ENSG00000259030	FPGT-TNNI3K	FPGT-TNNI3K readthrough
chr1	77684932	77685245	314	239	6.71901	27.6868	23.9726	Promoter (<=1kb)	1	77554667	77685132	10026	0	ENSG00000142892	PIGK	phosphatidylinositol glycan anchor biosynthesis class K
chr1	78148404	78148708	305	45	3.44957	7.89372	4.5853	Promoter (<=1kb)	1	78050202	78148343	26009	-61	ENSG00000036549	ZZZ3	zinc finger ZZ-type containing 3
chr1	78245153	78245529	377	362	8.77727	40.1143	36.2745	Promoter (<=1kb)	1	78245309	78345225	374986	0	ENSG00000180488	MIGA1	mitoguardin 1
chr1	84764080	84764298	219	45	3.96106	7.90541	4.5964	Promoter (<=1kb)	1	84764049	84816481	148418	31	ENSG00000203943	SAMD13	sterile alpha motif domain containing 13
chr1	85725111	85725477	367	177	5.10733	21.38	17.7521	Promoter (<=1kb)	1	85715637	85725355	148423	0	ENSG00000162642	C1orf52	chromosome 1 open reading frame 52
chr1	85991999	85992261	263	42	4.82745	7.50176	4.20799	Intron (uc001dlc.3/23576, intron 1 of 6)	1	85784168	86044046	23576	51785	ENSG00000153904	DDAH1	dimethylarginine dimethylaminohydrolase 1
chr1	87170224	87170475	252	52	3.62236	8.61563	5.27452	Promoter (<=1kb)	1	87170253	87213867	51100	0	ENSG00000097033	SH3GLB1	SH3 domain containing GRB2 like, endophilin B1
chr1	89149640	89150616	977	324	6.21318	36.2502	32.4453	Promoter (<=1kb)	1	89149922	89301938	5586	0	ENSG00000065243	PKN2	protein kinase N2
chr1	89357007	89357278	272	172	5.68532	20.8224	17.2028	Promoter (<=1kb)	1	89318321	89357301	2959	23	ENSG00000137947	GTF2B	general transcription factor IIB
chr1	89458461	89458788	328	207	4.52125	24.3725	20.702	Promoter (<=1kb)	1	89445139	89458643	494115	0	ENSG00000213516	RBMXL1	RNA binding motif protein, X-linked like 1
chr1	89990083	89990517	435	113	4.20604	14.8999	11.385	Promoter (<=1kb)	1	89990397	90063420	23507	0	ENSG00000197147	LRRC8B	leucine rich repeat containing 8 VRAC subunit B
chr1	90286407	90286686	280	85	3.94925	11.9782	8.53143	Promoter (<=1kb)	1	90286573	90401989	55144	0	ENSG00000171492	LRRC8D	leucine rich repeat containing 8 VRAC subunit D
chr1	90308814	90309028	215	32	2.80402	6.52884	3.29413	Intron (uc001dnm.3/55144, intron 1 of 2)	1	90287480	90401989	55144	21334	ENSG00000171492	LRRC8D	leucine rich repeat containing 8 VRAC subunit D
chr1	90460269	90461242	974	1521	19.0692	156.675	152.11	Promoter (<=1kb)	1	90460678	90472000	284695	0	ENSG00000162664	ZNF326	zinc finger protein 326
chr1	91486929	91487632	704	901	14.1934	94.3584	90.1481	Promoter (<=1kb)	1	91380857	91487065	84146	0	ENSG00000122482	ZNF644	zinc finger protein 644
chr1	92351661	92351967	307	54	3.70587	8.84823	5.49996	Promoter (<=1kb)	1	92145900	92351836	7049	0	ENSG00000069702	TGFBR3	transforming growth factor beta receptor 3
chr1	92764159	92764759	601	227	5.59387	26.4005	22.7027	Promoter (<=1kb)	1	92711955	92764566	11146	0	ENSG00000174842	GLMN	glomulin, FKBP associated protein
chr1	93297619	93298004	386	241	5.02987	27.8202	24.1044	Promoter (<=1kb)	1	93297917	93307481	6125	0	ENSG00000122406	RPL5	ribosomal protein L5
chr1	93544647	93545016	370	846	12.9761	88.8612	84.6822	Promoter (<=1kb)	1	93544792	93604638	22823	0	ENSG00000143033	MTF2	metal response element binding transcription factor 2
chr1	93645976	93646259	284	81	3.84687	11.6278	8.18965	Promoter (<=1kb)	1	93615299	93646246	50999	0	ENSG00000117500	TMED5	transmembrane p24 trafficking protein 5
chr1	93811425	93811787	363	146	4.82331	18.1807	14.6032	Promoter (<=1kb)	1	93811478	93828148	1810	0	ENSG00000117505	DR1	down-regulator of transcription 1
chr1	94313458	94313706	249	23	2.65279	5.5445	2.37814	Promoter (<=1kb)	1	94027343	94312706	8412	-752	ENSG00000137936	BCAR3	BCAR3, NSP family adaptor protein
chr1	94344520	94344794	275	105	3.98208	14.0308	10.5345	Promoter (<=1kb)	1	94335014	94344762	30836	0	ENSG00000067334	DNTTIP2	deoxynucleotidyltransferase terminal interacting protein 2
chr1	94883849	94884235	387	324	6.90992	36.2813	32.476	Promoter (<=1kb)	1	94883933	94944260	5825	0	ENSG00000117528	ABCD3	ATP binding cassette subfamily D member 3
chr1	95006833	95007139	307	122	5.74475	15.8249	12.2909	Promoter (<=1kb)	1	94994732	95006622	2152	-211	ENSG00000117525	F3	coagulation factor III, tissue factor
chr1	95699591	95700039	449	234	6.20596	27.1971	23.4893	Promoter (<=1kb)	1	95699711	95710509	100527978	0	ENSG00000271092	TMEM56-RWDD3	TMEM56-RWDD3 readthrough
chr1	97187101	97187985	885	1499	18.1451	154.466	149.913	Promoter (<=1kb)	1	97187175	97239518	58155	0	ENSG00000117569	PTBP2	polypyrimidine tract binding protein 2
chr1	99645930	99646231	302	142	8.54088	17.8574	14.2859	Distal Intergenic	1	99729848	99775138	9890	-83617	ENSG00000117600	PLPPR4	phospholipid phosphatase related 4
chr1	100503384	100504170	787	2775	27.8012	282.576	277.512	Promoter (<=1kb)	1	100503789	100548929	64645	0	ENSG00000156875	MFSD14A	major facilitator superfamily domain containing 14A
chr1	100598515	100598781	267	178	5.41611	21.4461	17.8163	Promoter (<=1kb)	1	100598706	100616054	54482	0	ENSG00000122435	TRMT13	tRNA methyltransferase 13 homolog
chr1	100817778	100818372	595	79	3.51071	11.3911	7.95897	Promoter (<=1kb)	1	100818023	100856616	8556	0	ENSG00000079335	CDC14A	cell division cycle 14A
chr1	104136837	104137217	381	25	4.08477	5.75617	2.55965	Intron (uc001dus.1/280, intron 3 of 4)	1	104118063	104153092	280	18774	ENSG00000240038	AMY2B	amylase, alpha 2B (pancreatic)
chr1	104149945	104150302	358	50	5.1988	8.42311	5.09023	Intron (uc001dus.1/280, intron 4 of 4)	1	104159999	104162543	279	-9697	ENSG00000243480	AMY2A	amylase, alpha 2A (pancreatic)
chr1	104250653	104250894	242	50	5.1988	8.42311	5.09023	Distal Intergenic	1	104230040	104239073	276	-11580	ENSG00000237763	AMY1A	amylase, alpha 1A (salivary)
chr1	107599238	107599516	279	70	3.50503	10.419	7.01464	Promoter (<=1kb)	1	107599267	107601916	55170	0	ENSG00000198890	PRMT6	protein arginine methyltransferase 6
chr1	109234693	109235303	611	1060	13.4632	110.404	106.1	Promoter (<=1kb)	1	109234932	109244422	55119	0	ENSG00000134186	PRPF38B	pre-mRNA processing factor 38B
chr1	109289141	109289720	580	237	5.3139	27.4337	23.7238	Promoter (<=1kb)	1	109289285	109319053	6814	0	ENSG00000116266	STXBP3	syntaxin binding protein 3
chr1	109359059	109359365	307	120	7.79819	15.6075	12.0775	Intron (uc001dwa.4/254268, intron 15 of 15)	1	109358520	109399726	254268	40361	ENSG00000162641	AKNAD1	AKNA domain containing 1
chr1	109419499	109419707	209	45	3.14738	7.85468	4.54845	Promoter (<=1kb)	1	109419603	109473044	29899	0	ENSG00000121957	GPSM2	G protein signaling modulator 2
chr1	110026381	110026886	506	4051	41.9938	410.491	405.105	Promoter (<=1kb)	1	110026561	110035420	127002	0	ENSG00000162650	ATXN7L2	ataxin 7 like 2
chr1	110162246	110162519	274	232	6.3849	26.98	23.2746	Promoter (<=1kb)	1	110162435	110174677	271	0	ENSG00000116337	AMPD2	adenosine monophosphate deaminase 2
chr1	110576976	110577560	585	1317	19.9114	136.239	131.782	Promoter (<=1kb)	1	110577223	110597424	85369	0	ENSG00000143093	STRIP1	striatin interacting protein 1
chr1	110881005	110881323	319	189	5.41169	22.5711	18.9253	Promoter (<=1kb)	1	110828999	110881793	440600	470	ENSG00000227963	RBM15-AS1	RBM15 antisense RNA 1
chr1	110881875	110882331	457	1582	18.126	162.849	158.253	Promoter (<=1kb)	1	110881945	110889303	64783	0	ENSG00000162775	RBM15	RNA binding motif protein 15
chr1	113161457	113161874	418	720	9.20985	76.1069	72.005	Promoter (<=1kb)	1	113066141	113161550	54879	0	ENSG00000007341	ST7L	suppression of tumorigenicity 7 like
chr1	113162250	113162635	386	1157	13.3671	120.08	115.719	Promoter (<=1kb)	1	113066141	113162405	54879	0	ENSG00000007341	ST7L	suppression of tumorigenicity 7 like
chr1	113612613	113613230	618	41	2.62459	7.46449	4.18048	Promoter (2-3kb)	1	113615831	113667342	9860	-2601	ENSG00000198799	LRIG2	leucine rich repeats and immunoglobulin like domains 2
chr1	113615849	113616238	390	218	5.22687	25.5387	21.8526	Promoter (<=1kb)	1	113615831	113667342	9860	18	ENSG00000198799	LRIG2	leucine rich repeats and immunoglobulin like domains 2
chr1	114193989	114194194	206	25	4.08477	5.75617	2.55965	Intron (uc001edh.3/260425, intron 15 of 21)	1	114223533	114228545	260425	-29339	ENSG00000081026	MAGI3	membrane associated guanylate kinase, WW and PDZ domain containing 3
chr1	114354787	114355293	507	180	5.83655	21.7211	18.0883	Promoter (<=1kb)	1	114304454	114355070	54665	0	ENSG00000081019	RSBN1	round spermatid basic protein 1
chr1	114471916	114472386	471	1958	22.68	200.59	195.826	Promoter (<=1kb)	1	114471996	114514698	204851	0	ENSG00000163349	HIPK1	homeodomain interacting protein kinase 1
chr1	115052939	115053928	990	390	9.10688	42.891	39.0274	Promoter (<=1kb)	1	114935399	115053781	51592	0	ENSG00000197323	TRIM33	tripartite motif containing 33
chr1	115259363	115259614	252	99	5.72132	13.4046	9.92326	Promoter (<=1kb)	1	115247085	115259515	4893	0	ENSG00000213281	NRAS	NRAS proto-oncogene, GTPase
chr1	115300025	115300818	794	878	11.9462	92.0229	87.8257	Promoter (<=1kb)	1	115259534	115300671	7812	0	ENSG00000009307	CSDE1	cold shock domain containing E1
chr1	117113646	117113932	287	56	3.57794	8.97711	5.62469	Promoter (<=1kb)	1	117057156	117113715	965	0	ENSG00000116815	CD58	CD58 molecule
chr1	119683087	119683476	390	913	16.324	95.5998	91.3827	Promoter (<=1kb)	1	119573839	119683295	10352	0	ENSG00000116874	WARS2	tryptophanyl tRNA synthetase 2, mitochondrial
chr1	120591950	120592173	224	42	4.82745	7.50176	4.20799	Promoter (2-3kb)	1	120492743	120594328	4853	2155	ENSG00000134250	NOTCH2	notch 2
chr1	121133474	121133775	302	117	7.08916	15.2695	11.7473	Distal Intergenic	1	121107152	121129827	100996712	26322	NA	SRGAP2D	SLIT-ROBO Rho GTPase activating protein 2D (pseudogene)
chr1	121351813	121352360	548	209	4.20213	24.6119	20.9384	Distal Intergenic	1	121306424	121313686	647121	45389	ENSG00000231752	EMBP1	embigin pseudogene 1
chr1	121352846	121353179	334	25	2.57354	5.74448	2.55965	Distal Intergenic	1	121306424	121313686	647121	46422	ENSG00000231752	EMBP1	embigin pseudogene 1
chr1	121354068	121354511	444	563	4.21597	60.3967	56.3995	Distal Intergenic	1	121306424	121313686	647121	47644	ENSG00000231752	EMBP1	embigin pseudogene 1
chr1	121354957	121355285	329	421	4.55439	46.0713	42.181	Distal Intergenic	1	121306424	121313686	647121	48533	ENSG00000231752	EMBP1	embigin pseudogene 1
chr1	121357777	121358184	408	1307	5.54905	135.171	130.72	Distal Intergenic	1	121306424	121313686	647121	51353	ENSG00000231752	EMBP1	embigin pseudogene 1
chr1	121358928	121359150	223	287	5.79774	32.5242	28.7564	Distal Intergenic	1	121306424	121313686	647121	52504	ENSG00000231752	EMBP1	embigin pseudogene 1
chr1	121359860	121360462	603	607	6.3822	64.7868	60.7591	Distal Intergenic	1	121306424	121313686	647121	53436	ENSG00000231752	EMBP1	embigin pseudogene 1
chr1	121362540	121362980	441	323	5.58508	36.1606	32.3563	Distal Intergenic	1	121306424	121313686	647121	56116	ENSG00000231752	EMBP1	embigin pseudogene 1
chr1	121364125	121364398	274	276	8.25842	31.4493	27.6923	Distal Intergenic	1	121306424	121313686	647121	57701	ENSG00000231752	EMBP1	embigin pseudogene 1
chr1	121365779	121366154	376	203	5.30944	24.0457	20.3785	Distal Intergenic	1	121306424	121313686	647121	59355	ENSG00000231752	EMBP1	embigin pseudogene 1
chr1	121366701	121366946	246	206	4.30496	24.357	20.6867	Distal Intergenic	1	121306424	121313686	647121	60277	ENSG00000231752	EMBP1	embigin pseudogene 1
chr1	121367315	121367620	306	95	5.39668	13.0708	9.59723	Distal Intergenic	1	121306424	121313686	647121	60891	ENSG00000231752	EMBP1	embigin pseudogene 1
chr1	121368753	121369063	311	85	5.80977	12.0237	8.57531	Distal Intergenic	1	121306424	121313686	647121	62329	ENSG00000231752	EMBP1	embigin pseudogene 1
chr1	121384762	121385012	251	71	5.25208	10.5758	7.16794	Distal Intergenic	1	121306424	121313686	647121	78338	ENSG00000231752	EMBP1	embigin pseudogene 1
chr1	121385631	121386023	393	87	5.92353	12.2405	8.78814	Distal Intergenic	1	121306424	121313686	647121	79207	ENSG00000231752	EMBP1	embigin pseudogene 1
chr1	121386263	121386597	335	239	8.01045	27.6194	23.9061	Distal Intergenic	1	121306424	121313686	647121	79839	ENSG00000231752	EMBP1	embigin pseudogene 1
chr1	121387509	121387731	223	43	3.6337	7.65869	4.35847	Distal Intergenic	1	121306424	121313686	647121	81085	ENSG00000231752	EMBP1	embigin pseudogene 1
chr1	121389755	121390024	270	48	4.88463	8.21396	4.89272	Distal Intergenic	1	121306424	121313686	647121	83331	ENSG00000231752	EMBP1	embigin pseudogene 1
chr1	121393006	121393418	413	135	6.63674	17.0586	13.5013	Distal Intergenic	1	121306424	121313686	647121	86582	ENSG00000231752	EMBP1	embigin pseudogene 1
chr1	121395424	121395935	512	44	4.62049	7.75471	4.45106	Distal Intergenic	1	121306424	121313686	647121	89000	ENSG00000231752	EMBP1	embigin pseudogene 1
chr1	121397921	121398441	521	118	5.8809	15.3519	11.8278	Distal Intergenic	1	121306424	121313686	647121	91497	ENSG00000231752	EMBP1	embigin pseudogene 1
chr1	121398753	121399548	796	110	5.88697	14.5595	11.0514	Distal Intergenic	1	121306424	121313686	647121	92329	ENSG00000231752	EMBP1	embigin pseudogene 1
chr1	121401773	121402173	401	177	8.75127	21.3512	17.7242	Distal Intergenic	1	121306424	121313686	647121	95349	ENSG00000231752	EMBP1	embigin pseudogene 1
chr1	121403883	121404132	250	125	4.91005	16.0762	12.5377	Distal Intergenic	1	121306424	121313686	647121	97459	ENSG00000231752	EMBP1	embigin pseudogene 1
chr1	121405088	121405474	387	465	13.5023	50.4531	46.5282	Distal Intergenic	1	121306424	121313686	647121	98664	ENSG00000231752	EMBP1	embigin pseudogene 1
chr1	121410536	121410937	402	33	4.45611	6.61197	3.36306	Distal Intergenic	1	121306424	121313686	647121	104112	ENSG00000231752	EMBP1	embigin pseudogene 1
chr1	121415067	121415874	808	88	5.77729	12.3493	8.89319	Distal Intergenic	1	121306424	121313686	647121	108643	ENSG00000231752	EMBP1	embigin pseudogene 1
chr1	121424426	121425387	962	131	8.16954	16.7228	13.1715	Distal Intergenic	1	121306424	121313686	647121	118002	ENSG00000231752	EMBP1	embigin pseudogene 1
chr1	121426724	121427004	281	286	6.12124	32.3963	28.63	Distal Intergenic	1	121306424	121313686	647121	120300	ENSG00000231752	EMBP1	embigin pseudogene 1
chr1	121430256	121430571	316	69	5.94148	10.3523	6.9518	Distal Intergenic	1	121306424	121313686	647121	123832	ENSG00000231752	EMBP1	embigin pseudogene 1
chr1	121445597	121445806	210	60	5.57014	9.37392	6.00505	Distal Intergenic	1	121306424	121313686	647121	139173	ENSG00000231752	EMBP1	embigin pseudogene 1
chr1	121456783	121457006	224	44	4.62049	7.75471	4.45106	Distal Intergenic	1	121306424	121313686	647121	150359	ENSG00000231752	EMBP1	embigin pseudogene 1
chr1	121458692	121458915	224	213	10.7689	25.0261	21.346	Distal Intergenic	1	121306424	121313686	647121	152268	ENSG00000231752	EMBP1	embigin pseudogene 1
chr1	121462378	121462622	245	99	7.05551	13.4379	9.95372	Distal Intergenic	1	121306424	121313686	647121	155954	ENSG00000231752	EMBP1	embigin pseudogene 1
chr1	121472979	121473230	252	33	4.45611	6.61197	3.36306	Distal Intergenic	1	121306424	121313686	647121	166555	ENSG00000231752	EMBP1	embigin pseudogene 1
chr1	121478398	121479147	750	573	4.20053	61.3247	57.3211	Distal Intergenic	1	121306424	121313686	647121	171974	ENSG00000231752	EMBP1	embigin pseudogene 1
chr1	142535789	142536043	255	24	3.13409	5.57439	2.40315	Distal Intergenic	1	142697421	142713605	100874392	177562	NA	ANKRD20A12P	ankyrin repeat domain 20 family member A12, pseudogene
chr1	142537402	142537772	371	56	3.49883	8.97591	5.62358	Distal Intergenic	1	142697421	142713605	100874392	175833	NA	ANKRD20A12P	ankyrin repeat domain 20 family member A12, pseudogene
chr1	142538268	142538836	569	59	2.82021	9.36402	5.99918	Distal Intergenic	1	142697421	142713605	100874392	174769	NA	ANKRD20A12P	ankyrin repeat domain 20 family member A12, pseudogene
chr1	142543221	142543476	256	99	5.9367	13.46	9.97532	Distal Intergenic	1	142697421	142713605	100874392	170129	NA	ANKRD20A12P	ankyrin repeat domain 20 family member A12, pseudogene
chr1	142553749	142554193	445	110	7.42685	14.5122	11.0046	Distal Intergenic	1	142697421	142713605	100874392	159412	NA	ANKRD20A12P	ankyrin repeat domain 20 family member A12, pseudogene
chr1	142554916	142555509	594	25	4.08477	5.75617	2.55965	Distal Intergenic	1	142697421	142713605	100874392	158096	NA	ANKRD20A12P	ankyrin repeat domain 20 family member A12, pseudogene
chr1	142556657	142557406	750	58	5.48375	9.22984	5.8702	Distal Intergenic	1	142697421	142713605	100874392	156199	NA	ANKRD20A12P	ankyrin repeat domain 20 family member A12, pseudogene
chr1	142570815	142571077	263	60	5.57014	9.37392	6.00505	Distal Intergenic	1	142697421	142713605	100874392	142528	NA	ANKRD20A12P	ankyrin repeat domain 20 family member A12, pseudogene
chr1	142571702	142572513	812	50	5.1988	8.42311	5.09023	Distal Intergenic	1	142697421	142713605	100874392	141092	NA	ANKRD20A12P	ankyrin repeat domain 20 family member A12, pseudogene
chr1	142573403	142573792	390	50	5.1988	8.42311	5.09023	Distal Intergenic	1	142697421	142713605	100874392	139813	NA	ANKRD20A12P	ankyrin repeat domain 20 family member A12, pseudogene
chr1	142584810	142585245	436	79	5.85261	11.331	7.90217	Distal Intergenic	1	142697421	142713605	100874392	128360	NA	ANKRD20A12P	ankyrin repeat domain 20 family member A12, pseudogene
chr1	142585851	142586306	456	42	4.82745	7.50176	4.20799	Distal Intergenic	1	142697421	142713605	100874392	127299	NA	ANKRD20A12P	ankyrin repeat domain 20 family member A12, pseudogene
chr1	142653950	142654177	228	20	3.3481	5.18361	2.03477	Intron (uc001eiw.1/uc001eiw.1, intron 1 of 7)	1	142697421	142713605	100874392	59428	NA	ANKRD20A12P	ankyrin repeat domain 20 family member A12, pseudogene
chr1	142781232	142781641	410	60	5.57014	9.37392	6.00505	Intron (uc001eiw.1/uc001eiw.1, intron 1 of 7)	1	142697421	142713605	100874392	-67627	NA	ANKRD20A12P	ankyrin repeat domain 20 family member A12, pseudogene
chr1	142782255	142782729	475	50	5.1988	8.42311	5.09023	Intron (uc001eiw.1/uc001eiw.1, intron 1 of 7)	1	142697421	142713605	100874392	-68650	NA	ANKRD20A12P	ankyrin repeat domain 20 family member A12, pseudogene
chr1	142782974	142783274	301	18	3.71343	4.93715	1.80582	Intron (uc001eiw.1/uc001eiw.1, intron 1 of 7)	1	142697421	142713605	100874392	-69369	NA	ANKRD20A12P	ankyrin repeat domain 20 family member A12, pseudogene
chr1	142785568	142785918	351	16	3.1315	4.76986	1.6752	Intron (uc001eiw.1/uc001eiw.1, intron 1 of 7)	1	142697421	142713605	100874392	-71963	NA	ANKRD20A12P	ankyrin repeat domain 20 family member A12, pseudogene
chr1	142786876	142787286	411	25	4.08477	5.75617	2.55965	Intron (uc001eiw.1/uc001eiw.1, intron 1 of 7)	1	142697421	142713605	100874392	-73271	NA	ANKRD20A12P	ankyrin repeat domain 20 family member A12, pseudogene
chr1	142788739	142789248	510	72	5.71095	10.6984	7.28734	Intron (uc001eiw.1/uc001eiw.1, intron 1 of 7)	1	142697421	142713605	100874392	-75134	NA	ANKRD20A12P	ankyrin repeat domain 20 family member A12, pseudogene
chr1	142790050	142790459	410	47	5.01218	8.11358	4.79657	Intron (uc001eiw.1/uc001eiw.1, intron 1 of 7)	1	142697421	142713605	100874392	-76445	NA	ANKRD20A12P	ankyrin repeat domain 20 family member A12, pseudogene
chr1	142790938	142791213	276	23	3.8073	5.54372	2.37814	Intron (uc001eiw.1/uc001eiw.1, intron 1 of 7)	1	142697421	142713605	100874392	-77333	NA	ANKRD20A12P	ankyrin repeat domain 20 family member A12, pseudogene
chr1	142791556	142791839	284	46	4.26926	7.99129	4.67827	Intron (uc001eiw.1/uc001eiw.1, intron 1 of 7)	1	142697421	142713605	100874392	-77951	NA	ANKRD20A12P	ankyrin repeat domain 20 family member A12, pseudogene
chr1	142802366	142802693	328	60	5.57014	9.37392	6.00505	Intron (uc001eiw.1/uc001eiw.1, intron 1 of 7)	1	142697421	142713605	100874392	-88761	NA	ANKRD20A12P	ankyrin repeat domain 20 family member A12, pseudogene
chr1	142805216	142805578	363	50	5.1988	8.42311	5.09023	Exon (uc001ejb.3/uc001ejb.3, exon 3 of 4)	1	142697421	142713605	100874392	-91611	NA	ANKRD20A12P	ankyrin repeat domain 20 family member A12, pseudogene
chr1	142811500	142811754	255	40	4.38863	7.34457	4.06506	Intron (uc001eiw.1/uc001eiw.1, intron 1 of 7)	1	142697421	142713605	100874392	-97895	NA	ANKRD20A12P	ankyrin repeat domain 20 family member A12, pseudogene
chr1	142813982	142814380	399	32	4.21746	6.48817	3.25823	Intron (uc001eiw.1/uc001eiw.1, intron 1 of 7)	1	142697421	142713605	100874392	-100377	NA	ANKRD20A12P	ankyrin repeat domain 20 family member A12, pseudogene
chr1	142904966	142905333	368	42	4.82745	7.50176	4.20799	Intron (uc001eiw.1/uc001eiw.1, intron 1 of 7)	1	142697421	142713605	100874392	-191361	NA	ANKRD20A12P	ankyrin repeat domain 20 family member A12, pseudogene
chr1	142933700	142933935	236	69	5.94148	10.3523	6.9518	Intron (uc001eiw.1/uc001eiw.1, intron 1 of 7)	1	142697421	142713605	100874392	-220095	NA	ANKRD20A12P	ankyrin repeat domain 20 family member A12, pseudogene
chr1	142940572	142941086	515	99	7.05551	13.4379	9.95372	Intron (uc001eiw.1/uc001eiw.1, intron 1 of 7)	1	142697421	142713605	100874392	-226967	NA	ANKRD20A12P	ankyrin repeat domain 20 family member A12, pseudogene
chr1	142955579	142955821	243	50	5.1988	8.42311	5.09023	Intron (uc001eiw.1/uc001eiw.1, intron 1 of 7)	1	142697421	142713605	100874392	-241974	NA	ANKRD20A12P	ankyrin repeat domain 20 family member A12, pseudogene
chr1	142957927	142958853	927	83	6.36513	11.8413	8.39807	Intron (uc001eiw.1/uc001eiw.1, intron 1 of 7)	1	142697421	142713605	100874392	-244322	NA	ANKRD20A12P	ankyrin repeat domain 20 family member A12, pseudogene
chr1	142962923	142963303	381	22	3.84264	5.36654	2.20802	Intron (uc001eiw.1/uc001eiw.1, intron 1 of 7)	1	142697421	142713605	100874392	-249318	NA	ANKRD20A12P	ankyrin repeat domain 20 family member A12, pseudogene
chr1	142963728	142964024	297	31	4.31402	6.38102	3.15441	Intron (uc001eiw.1/uc001eiw.1, intron 1 of 7)	1	142697421	142713605	100874392	-250123	NA	ANKRD20A12P	ankyrin repeat domain 20 family member A12, pseudogene
chr1	142964477	142965301	825	85	6.47103	12.0229	8.57444	Intron (uc001eiw.1/uc001eiw.1, intron 1 of 7)	1	142697421	142713605	100874392	-250872	NA	ANKRD20A12P	ankyrin repeat domain 20 family member A12, pseudogene
chr1	142965645	142965856	212	50	5.1988	8.42311	5.09023	Intron (uc001eiw.1/uc001eiw.1, intron 1 of 7)	1	142697421	142713605	100874392	-252040	NA	ANKRD20A12P	ankyrin repeat domain 20 family member A12, pseudogene
chr1	143258085	143258378	294	50	5.1988	8.42311	5.09023	Distal Intergenic	1	143687130	143705973	100130000	-428752	NA	NA	NA
chr1	143260656	143260861	206	36	4.31245	6.92551	3.66431	Distal Intergenic	1	143687130	143705973	100130000	-426269	NA	NA	NA
chr1	143267372	143267633	262	68	5.89924	10.2815	6.88566	Distal Intergenic	1	143687130	143705973	100130000	-419497	NA	NA	NA
chr1	143535476	143535975	500	69	5.94148	10.3523	6.9518	Distal Intergenic	1	143687130	143705973	100130000	-151155	NA	NA	NA
chr1	143540059	143540377	319	42	4.82745	7.50176	4.20799	Distal Intergenic	1	143687130	143705973	100130000	-146753	NA	NA	NA
chr1	143543662	143543907	246	60	5.57014	9.37392	6.00505	Distal Intergenic	1	143687130	143705973	100130000	-143223	NA	NA	NA
chr1	143743418	143743830	413	203	3.57868	24.0655	20.3982	Promoter (<=1kb)	1	143647639	143744587	100286793	757	NA	NA	NA
chr1	143744712	143744940	229	42	3.11713	7.55302	4.25736	Promoter (<=1kb)	1	143719239	143744587	100286793	-125	NA	NA	NA
chr1	143763364	143763649	286	42	4.82745	7.50176	4.20799	Distal Intergenic	1	143767144	143767881	644591	4232	ENSG00000236334	PPIAL4G	peptidylprolyl isomerase A like 4G
chr1	144221041	144221395	355	99	7.05551	13.4379	9.95372	Promoter (2-3kb)	1	144218499	144830407	728841	2542	ENSG00000270231	NBPF8	NBPF member 8
chr1	144341041	144341288	248	77	4.86695	11.1576	7.73396	Promoter (<=1kb)	1	144339563	144340773	728855	-268	NA	LINC00623	long intergenic non-protein coding RNA 623
chr1	144518031	144518333	303	33	4.45611	6.61197	3.36306	Promoter (2-3kb)	1	144480745	144521009	728875	2676	NA	NA	NA
chr1	144519981	144520254	274	123	3.90818	15.9091	12.3733	Promoter (<=1kb)	1	144480745	144521009	728875	755	NA	NA	NA
chr1	144593621	144593829	209	63	2.70721	9.77621	6.39455	Promoter (<=1kb)	1	144593696	144615303	400818	0	ENSG00000269713	NBPF9	NBPF member 9
chr1	144825673	144825935	263	79	6.31282	11.3568	7.92535	Intron (uc010oxn.2/728841, intron 15 of 18)	1	144811947	144827928	400818	13726	ENSG00000269713	NBPF9	NBPF member 9
chr1	144826356	144826596	241	89	6.68417	12.3857	8.92713	Intron (uc010oxn.2/728841, intron 16 of 18)	1	144811947	144827928	400818	14409	ENSG00000269713	NBPF9	NBPF member 9
chr1	144931848	144932412	565	6311	24.1114	636.988	631.178	Promoter (<=1kb)	1	144890591	144932032	9659	0	ENSG00000178104	PDE4DIP	phosphodiesterase 4D interacting protein
chr1	144946806	144947106	301	60	5.57014	9.37392	6.00505	Intron (uc021ott.2/100288142, intron 53 of 131)	1	144890591	144932032	9659	-14774	ENSG00000178104	PDE4DIP	phosphodiesterase 4D interacting protein
chr1	145099154	145099598	445	42	4.82745	7.50176	4.20799	Promoter (2-3kb)	1	145096407	145116997	9554	2747	ENSG00000265808	SEC22B	SEC22 homolog B, vesicle trafficking protein (gene/pseudogene)
chr1	145100148	145100381	234	25	4.08477	5.75617	2.55965	Intron (uc021ott.2/100288142, intron 53 of 131)	1	145096407	145116997	9554	3741	ENSG00000265808	SEC22B	SEC22 homolog B, vesicle trafficking protein (gene/pseudogene)
chr1	145189102	145189368	267	42	4.82745	7.50176	4.20799	Intron (uc021ott.2/100288142, intron 53 of 131)	1	145209111	145304652	100132406	-19743	ENSG00000271425	NBPF10	NBPF member 10
chr1	145228593	145229059	467	33	4.45611	6.61197	3.36306	Intron (uc021ott.2/100288142, intron 53 of 131)	1	145224597	145285912	388677	3996	ENSG00000264343	NOTCH2NL	notch 2 N-terminal like
chr1	145246276	145246481	206	33	4.45611	6.61197	3.36306	Intron (uc021ott.2/100288142, intron 53 of 131)	1	145224597	145285912	388677	21679	ENSG00000264343	NOTCH2NL	notch 2 N-terminal like
chr1	145247313	145247587	275	28	4.12529	6.0719	2.85886	Intron (uc021ott.2/100288142, intron 53 of 131)	1	145224597	145285912	388677	22716	ENSG00000264343	NOTCH2NL	notch 2 N-terminal like
chr1	145258878	145259084	207	33	4.45611	6.61197	3.36306	Intron (uc021ott.2/100288142, intron 53 of 131)	1	145293233	145311154	100132406	-34149	ENSG00000271425	NBPF10	NBPF member 10
chr1	145290588	145291133	546	42	4.82745	7.50176	4.20799	Promoter (2-3kb)	1	145293233	145311154	100132406	-2100	ENSG00000271425	NBPF10	NBPF member 10
chr1	145293179	145293406	228	33	4.45611	6.61197	3.36306	Promoter (<=1kb)	1	145293233	145311154	100132406	0	ENSG00000271425	NBPF10	NBPF member 10
chr1	145313936	145314291	356	329	14.111	36.7462	32.9371	Promoter (<=1kb)	1	145313334	145358412	100132406	602	ENSG00000271425	NBPF10	NBPF member 10
chr1	145317531	145317772	242	120	7.79819	15.6075	12.0775	Promoter (<=1kb)	1	145318054	145344236	100288142	-282	ENSG00000162825	NBPF20	NBPF member 20
chr1	145318681	145318965	285	131	8.16954	16.7228	13.1715	Promoter (<=1kb)	1	145318054	145344236	100288142	627	ENSG00000162825	NBPF20	NBPF member 20
chr1	145324592	145325483	892	69	5.94148	10.3523	6.9518	Promoter (<=1kb)	1	145324348	145353680	100132406	244	ENSG00000271425	NBPF10	NBPF member 10
chr1	145330310	145330534	225	69	5.94148	10.3523	6.9518	Intron (uc021ott.2/100288142, intron 63 of 131)	1	145324348	145353680	100132406	5962	ENSG00000271425	NBPF10	NBPF member 10
chr1	145331138	145331414	277	69	5.94148	10.3523	6.9518	Intron (uc021ott.2/100288142, intron 64 of 131)	1	145324348	145353680	100132406	6790	ENSG00000271425	NBPF10	NBPF member 10
chr1	145334509	145334983	475	60	5.57014	9.37392	6.00505	3' UTR	1	145324348	145353680	100132406	10161	ENSG00000271425	NBPF10	NBPF member 10
chr1	145335435	145335759	325	44	4.62049	7.75471	4.45106	Exon (uc021ott.2/100288142, exon 70 of 132)	1	145324348	145353680	100132406	11087	ENSG00000271425	NBPF10	NBPF member 10
chr1	145339462	145339680	219	60	5.57014	9.37392	6.00505	3' UTR	1	145324348	145353680	100132406	15114	ENSG00000271425	NBPF10	NBPF member 10
chr1	145340294	145340525	232	40	4.20166	7.28823	4.01023	Intron (uc021ott.2/100288142, intron 76 of 131)	1	145324348	145353680	100132406	15946	ENSG00000271425	NBPF10	NBPF member 10
chr1	145341787	145342031	245	79	6.31282	11.3568	7.92535	Exon (uc021ott.2/100288142, exon 78 of 132)	1	145324348	145353680	100132406	17439	ENSG00000271425	NBPF10	NBPF member 10
chr1	145343892	145344316	425	50	5.1988	8.42311	5.09023	3' UTR	1	145360555	145364674	100132406	-16239	ENSG00000271425	NBPF10	NBPF member 10
chr1	145348545	145348833	289	60	5.57014	9.37392	6.00505	Intron (uc021ott.2/100288142, intron 86 of 131)	1	145360555	145364674	100132406	-11722	ENSG00000271425	NBPF10	NBPF member 10
chr1	145349731	145350594	864	99	7.05551	13.4379	9.95372	Exon (uc021ott.2/100288142, exon 88 of 132)	1	145360555	145364674	100132406	-9961	ENSG00000271425	NBPF10	NBPF member 10
chr1	145351963	145352234	272	98	6.74142	13.3229	9.84328	Exon (uc021ott.2/100288142, exon 91 of 132)	1	145360555	145364674	100132406	-8321	ENSG00000271425	NBPF10	NBPF member 10
chr1	145355758	145356054	297	42	4.52652	7.58934	4.29233	Exon (uc021ott.2/100288142, exon 96 of 132)	1	145360555	145364674	100132406	-4501	ENSG00000271425	NBPF10	NBPF member 10
chr1	145356766	145357057	292	69	5.94148	10.3523	6.9518	Exon (uc021oul.2/100132406, exon 69 of 84)	1	145360555	145364674	100132406	-3498	ENSG00000271425	NBPF10	NBPF member 10
chr1	145361538	145361875	338	131	8.16954	16.7228	13.1715	Promoter (<=1kb)	1	145360555	145364674	100132406	983	ENSG00000271425	NBPF10	NBPF member 10
chr1	145366093	145366354	262	25	4.08477	5.75617	2.55965	Exon (uc021oul.2/100132406, exon 81 of 84)	1	145360555	145364674	100132406	5538	ENSG00000271425	NBPF10	NBPF member 10
chr1	145507336	145507599	264	62	4.35562	9.66252	6.2844	Promoter (<=1kb)	1	145507557	145513535	9939	0	ENSG00000265241	RBM8A	RNA binding motif protein 8A
chr1	145516256	145516483	228	106	3.39707	14.1231	10.6256	Promoter (<=1kb)	1	145516560	145523732	8799	-77	ENSG00000131779	PEX11B	peroxisomal biogenesis factor 11 beta
chr1	145575840	145576312	473	990	14.9383	103.264	99.0022	Promoter (<=1kb)	1	145575988	145586546	10401	0	ENSG00000131788	PIAS3	protein inhibitor of activated STAT 3
chr1	145589218	145589529	312	82	4.13478	11.7331	8.29211	Promoter (<=1kb)	1	145586493	145589435	200035	0	ENSG00000186364	NUDT17	nudix hydrolase 17
chr1	145611005	145611375	371	521	8.87353	56.1633	52.1957	Promoter (<=1kb)	1	145611036	145688776	27246	0	ENSG00000265491	RNF115	ring finger protein 115
chr1	146373555	146374042	488	67	4.55522	10.1221	6.73037	Promoter (<=1kb)	1	146373857	146467744	149013	0	ENSG00000268043	NBPF12	NBPF member 12
chr1	146643542	146644291	750	244	5.39566	28.2041	24.4845	Promoter (<=1kb)	1	146626685	146644129	5565	0	ENSG00000131791	PRKAB2	protein kinase AMP-activated non-catalytic subunit beta 2
chr1	147931104	147931464	361	308	3.86254	34.6545	30.8654	Promoter (<=1kb)	1	147905097	147931904	388685	440	ENSG00000274020	LINC01138	long intergenic non-protein coding RNA 1138
chr1	147932230	147932525	296	139	5.78089	17.5154	13.9504	Promoter (<=1kb)	1	147907098	147931980	388685	-250	ENSG00000274020	LINC01138	long intergenic non-protein coding RNA 1138
chr1	148006901	148007832	932	110	7.42685	14.5122	11.0046	Exon (uc001eqe.3/728841, exon 10 of 14)	1	148005403	148011788	728841	3956	ENSG00000270231	NBPF8	NBPF member 8
chr1	148010151	148011095	945	177	9.65491	21.3682	17.7406	Promoter (<=1kb)	1	148005403	148011788	728841	693	ENSG00000270231	NBPF8	NBPF member 8
chr1	148013753	148014162	410	58	4.57706	9.22266	5.86316	Promoter (1-2kb)	1	148005403	148011788	728841	-1965	ENSG00000270231	NBPF8	NBPF member 8
chr1	148592259	148592474	216	50	5.1988	8.42311	5.09023	Intron (uc001esb.2/284565, intron 19 of 21)	1	148560847	148596267	284565	31412	ENSG00000266338	NBPF15	NBPF member 15
chr1	148676757	148677104	348	50	5.1988	8.42311	5.09023	Distal Intergenic	1	148644011	148644795	730262	32746	ENSG00000271567	PPIAL4E	peptidylprolyl isomerase A like 4E
chr1	148680296	148680549	254	69	5.94148	10.3523	6.9518	Distal Intergenic	1	148644011	148644795	730262	36285	ENSG00000271567	PPIAL4E	peptidylprolyl isomerase A like 4E
chr1	148754344	148754562	219	60	5.57014	9.37392	6.00505	Intron (uc010pba.1/728936, intron 13 of 15)	1	148739562	148758311	728936	14782	NA	NA	NA
chr1	148842022	148842539	518	79	6.31282	11.3568	7.92535	Distal Intergenic	1	148806015	148806799	728945	36007	ENSG00000279782	PPIAL4F	peptidylprolyl isomerase A like 4F
chr1	148845786	148846247	462	89	6.68417	12.3857	8.92713	Distal Intergenic	1	148806015	148806799	728945	39771	ENSG00000279782	PPIAL4F	peptidylprolyl isomerase A like 4F
chr1	148846831	148847121	291	120	7.79819	15.6075	12.0775	Distal Intergenic	1	148806015	148806799	728945	40816	ENSG00000279782	PPIAL4F	peptidylprolyl isomerase A like 4F
chr1	148847851	148848133	283	42	4.82745	7.50176	4.20799	Distal Intergenic	1	148806015	148806799	728945	41836	ENSG00000279782	PPIAL4F	peptidylprolyl isomerase A like 4F
chr1	148872938	148873448	511	65	5.09344	9.91964	6.53457	Distal Intergenic	1	148928286	148951595	645166	-54838	NA	LOC645166	lymphocyte-specific protein 1 pseudogene
chr1	148911622	148911943	322	19	3.44228	5.14018	1.99428	Distal Intergenic	1	148928286	148951595	645166	-16343	NA	LOC645166	lymphocyte-specific protein 1 pseudogene
chr1	149016232	149016732	501	50	5.1988	8.42311	5.09023	Distal Intergenic	1	148930405	148953054	645166	85827	NA	LOC645166	lymphocyte-specific protein 1 pseudogene
chr1	149027571	149027814	244	103	7.01498	13.8018	10.3102	Distal Intergenic	1	148930405	148953054	645166	97166	NA	LOC645166	lymphocyte-specific protein 1 pseudogene
chr1	149032059	149032999	941	131	8.16954	16.7228	13.1715	Distal Intergenic	1	148930405	148953054	645166	101654	NA	LOC645166	lymphocyte-specific protein 1 pseudogene
chr1	149033585	149033961	377	46	4.91048	7.94379	4.63353	Distal Intergenic	1	148930405	148953054	645166	103180	NA	LOC645166	lymphocyte-specific protein 1 pseudogene
chr1	149034726	149035025	300	53	4.62457	8.68913	5.34614	Distal Intergenic	1	148930405	148953054	645166	104321	NA	LOC645166	lymphocyte-specific protein 1 pseudogene
chr1	149858521	149858741	221	62	4.46137	9.59781	6.22117	Promoter (<=1kb)	1	149858525	149858961	8338	0	ENSG00000184260	HIST2H2AC	histone cluster 2 H2A family member c
chr1	149889187	149889420	234	60	3.92985	9.45922	6.08689	Promoter (<=1kb)	1	149874872	149889434	9900	14	ENSG00000159164	SV2A	synaptic vesicle glycoprotein 2A
chr1	149899424	149899969	546	777	9.41304	81.9314	77.7935	Promoter (<=1kb)	1	149897438	149899962	10262	0	ENSG00000143368	SF3B4	splicing factor 3b subunit 4
chr1	150336038	150336468	431	96	5.09756	13.0922	9.6176	Promoter (<=1kb)	1	150336990	150446032	23248	-522	ENSG00000163125	RPRD2	regulation of nuclear pre-mRNA domain containing 2
chr1	150336937	150337411	475	1383	21.6142	142.839	138.344	Promoter (<=1kb)	1	150336990	150446032	23248	0	ENSG00000163125	RPRD2	regulation of nuclear pre-mRNA domain containing 2
chr1	150551621	150551880	260	44	3.25268	7.76719	4.46254	Promoter (<=1kb)	1	150547027	150552086	4170	206	ENSG00000143384	MCL1	MCL1, BCL2 family apoptosis regulator
chr1	150601781	150602195	415	234	5.68869	27.2001	23.492	Promoter (<=1kb)	1	150594599	150602098	2029	0	ENSG00000143420	ENSA	endosulfine alpha
chr1	150848814	150849415	602	2231	18.3949	228.064	223.183	Promoter (<=1kb)	1	150782181	150849244	405	0	ENSG00000143437	ARNT	aryl hydrocarbon receptor nuclear translocator
chr1	150946596	150947344	749	219	7.11828	25.6633	21.9748	Promoter (<=1kb)	1	150937649	150947479	29956	135	ENSG00000143418	CERS2	ceramide synthase 2
chr1	151020399	151020700	302	278	6.43352	31.5728	27.8144	Promoter (<=1kb)	1	151020259	151023871	54964	140	ENSG00000143443	C1orf56	chromosome 1 open reading frame 56
chr1	151171291	151171511	221	63	3.3184	9.73244	6.35237	Promoter (<=1kb)	1	151171021	151222007	8394	270	ENSG00000143398	PIP5K1A	phosphatidylinositol-4-phosphate 5-kinase type 1 alpha
chr1	151255044	151255365	322	193	5.06098	22.9813	19.3289	Promoter (<=1kb)	1	151254791	151264381	57592	253	ENSG00000143373	ZNF687	zinc finger protein 687
chr1	151483434	151483942	509	1231	15.9167	127.562	123.156	Promoter (<=1kb)	1	151483862	151511167	57530	0	ENSG00000143375	CGN	cingulin
chr1	151584402	151585003	602	1203	16.9862	124.69	120.301	Promoter (<=1kb)	1	151584541	151671559	81609	0	ENSG00000143376	SNX27	sorting nexin family member 27
chr1	151735689	151736234	546	1581	28.7961	162.703	158.108	Promoter (<=1kb)	1	151732123	151736040	65005	0	ENSG00000143436	MRPL9	mitochondrial ribosomal protein L9
chr1	153606285	153606859	575	1753	13.9313	179.98	175.303	Promoter (<=1kb)	1	153606458	153611374	26097	0	ENSG00000160679	CHTOP	chromatin target of PRMT1
chr1	153631070	153631291	222	156	5.70134	19.2837	15.6874	Promoter (<=1kb)	1	153631130	153634328	23557	0	ENSG00000143553	SNAPIN	SNAP associated protein
chr1	153700342	153700607	266	199	5.13104	23.6471	19.9865	Promoter (<=1kb)	1	153700549	153746555	65123	0	ENSG00000143624	INTS3	integrator complex subunit 3
chr1	153756198	153756413	216	77	3.7139	11.1648	7.74052	Distal Intergenic	1	153747768	153752633	11000	8430	ENSG00000143554	SLC27A3	solute carrier family 27 member 3
chr1	153930831	153931134	304	19	2.4651	5.08984	1.94746	Promoter (<=1kb)	1	153920148	153931132	200186	0	ENSG00000160741	CRTC2	CREB regulated transcription coactivator 2
chr1	153939637	153939888	252	183	5.79242	21.9794	18.3418	Promoter (<=1kb)	1	153931575	153940208	27173	320	ENSG00000143570	SLC39A1	solute carrier family 39 member 1
chr1	153950061	153950301	241	187	4.56749	22.3722	18.7293	Promoter (<=1kb)	1	153946745	153950451	10899	150	ENSG00000143543	JTB	jumping translocation breakpoint
chr1	153958653	153958866	214	98	4.17492	13.3178	9.83827	Promoter (<=1kb)	1	153954093	153958853	5872	0	ENSG00000143545	RAB13	RAB13, member RAS oncogene family
chr1	153963005	153963616	612	510	9.87852	55.0112	51.0523	Promoter (<=1kb)	1	153963239	153964631	6232	0	ENSG00000177954	RPS27	ribosomal protein S27
chr1	154192760	154193419	660	1604	22.7094	165.064	160.457	Promoter (<=1kb)	1	154179183	154193273	25912	0	ENSG00000143612	C1orf43	chromosome 1 open reading frame 43
chr1	154297711	154298232	522	3709	35.7508	376.25	370.94	Promoter (<=1kb)	1	154298036	154310322	57198	0	ENSG00000143515	ATP8B2	ATPase phospholipid transporting 8B2
chr1	154530964	154531388	425	631	9.76558	67.1728	63.1291	Promoter (<=1kb)	1	154521051	154531120	55585	0	ENSG00000160714	UBE2Q1	ubiquitin conjugating enzyme E2 Q1
chr1	154580429	154580813	385	509	11.5474	54.9272	50.9691	Promoter (<=1kb)	1	154554534	154580724	103	0	ENSG00000160710	ADAR	adenosine deaminase, RNA specific
chr1	154933875	154934194	320	245	7.86672	28.2651	24.545	Promoter (<=1kb)	1	154929502	154934258	90780	64	ENSG00000163348	PYGO2	pygopus family PHD finger 2
chr1	155178807	155179291	485	2438	17.6944	248.795	243.836	Promoter (<=1kb)	1	155170242	155178969	7059	0	ENSG00000169231	THBS3	thrombospondin 3
chr1	155220387	155220700	314	149	4.50091	18.5428	14.9595	Promoter (<=1kb)	1	155216996	155221696	10712	996	ENSG00000160767	FAM189B	family with sequence similarity 189 member B
chr1	155225175	155225426	252	221	5.29155	25.8345	22.1438	Promoter (<=1kb)	1	155216996	155225274	10712	0	ENSG00000160767	FAM189B	family with sequence similarity 189 member B
chr1	155242775	155243265	491	1048	13.8198	109.124	104.827	Promoter (<=1kb)	1	155232659	155243281	1196	16	ENSG00000176444	CLK2	CDC like kinase 2
chr1	155247210	155247446	237	48	3.22845	8.11851	4.80057	Promoter (<=1kb)	1	155247218	155258498	57657	0	ENSG00000143630	HCN3	hyperpolarization activated cyclic nucleotide gated potassium channel 3
chr1	155531922	155532468	547	1809	19.1519	185.695	180.992	Promoter (<=1kb)	1	155305052	155532324	55870	0	ENSG00000116539	ASH1L	ASH1 like histone lysine methyltransferase
chr1	155532792	155533022	231	53	3.40381	8.67846	5.33574	Promoter (<=1kb)	1	155447677	155532585	55870	-207	ENSG00000116539	ASH1L	ASH1 like histone lysine methyltransferase
chr1	155579915	155580210	296	238	5.58113	27.5209	23.809	Promoter (<=1kb)	1	155579961	155584758	55154	0	ENSG00000125459	MSTO1	misato 1, mitochondrial distribution and morphology regulator
chr1	155657869	155658455	587	1394	17.2571	143.908	139.408	Promoter (<=1kb)	1	155629233	155658447	55249	0	ENSG00000163374	YY1AP1	YY1 associated protein 1
chr1	155715493	155715743	251	103	3.87079	13.8567	10.3637	Promoter (<=1kb)	1	155715559	155717687	100129405	0	NA	MSTO2P	misato family member 2, pseudogene
chr1	155826884	155827196	313	397	8.23701	43.6405	39.7705	Promoter (<=1kb)	1	155719510	155826972	54856	0	ENSG00000116580	GON4L	gon-4 like
chr1	155829933	155830429	497	301	5.60471	33.9161	30.1345	Promoter (<=1kb)	1	155829260	155854990	23208	673	ENSG00000132718	SYT11	synaptotagmin 11
chr1	155880997	155881364	368	434	7.86935	47.3602	43.4605	Promoter (<=1kb)	1	155867599	155881193	6016	0	ENSG00000143622	RIT1	Ras like without CAAX 1
chr1	155904035	155904533	499	196	4.96981	23.2844	19.6283	Promoter (<=1kb)	1	155882836	155904188	22889	0	ENSG00000132680	KHDC4	KH domain containing 4, pre-mRNA splicing factor
chr1	156023397	156023738	342	158	4.98724	19.4883	15.8893	Promoter (<=1kb)	1	156005092	156023516	56893	0	ENSG00000160803	UBQLN4	ubiquilin 4
chr1	156163591	156163877	287	228	5.92882	26.5595	22.8604	Promoter (<=1kb)	1	156163730	156182587	9673	0	ENSG00000160785	SLC25A44	solute carrier family 25 member 44
chr1	156182626	156182985	360	120	4.30618	15.5823	12.0536	Promoter (<=1kb)	1	156182779	156207082	100527963	0	ENSG00000260238	PMF1-BGLAP	PMF1-BGLAP readthrough
chr1	156252311	156252866	556	2372	23.9343	242.217	237.281	Promoter (<=1kb)	1	156219015	156252620	23381	0	ENSG00000198952	SMG5	SMG5, nonsense mediated mRNA decay factor
chr1	156382393	156382624	232	81	4.38329	11.5628	8.12582	Exon (uc001foy.1/10485, exon 4 of 4)	1	156390133	156390221	407046	7597	ENSG00000207933	MIR9-1	microRNA 9-1
chr1	156737222	156737645	424	100	3.33297	13.5603	10.0748	Promoter (<=1kb)	1	156737274	156770609	5546	0	ENSG00000143294	PRCC	papillary renal cell carcinoma (translocation-associated)
chr1	158083272	158083513	242	58	3.76169	9.26059	5.8988	Distal Intergenic	1	158056386	158065844	55243	26886	ENSG00000183853	KIRREL1	kirre like nephrin family adhesion molecule 1
chr1	160175020	160175228	209	69	3.87635	10.3867	6.9842	Promoter (<=1kb)	1	160175125	160185162	8682	0	ENSG00000162734	PEA15	proliferation and apoptosis adaptor protein 15
chr1	160232010	160232464	455	1477	14.3764	152.252	147.71	Promoter (<=1kb)	1	160185505	160232277	50717	0	ENSG00000132716	DCAF8	DDB1 and CUL4 associated factor 8
chr1	160254731	160255170	440	1177	16.7453	122.122	117.748	Promoter (<=1kb)	1	160185505	160254941	50717	0	ENSG00000132716	DCAF8	DDB1 and CUL4 associated factor 8
chr1	160313015	160313395	381	305	5.76552	34.3804	30.5934	Promoter (<=1kb)	1	160258377	160313354	1314	0	ENSG00000122218	COPA	coatomer protein complex subunit alpha
chr1	160370107	160370349	243	114	4.87626	14.9371	11.4213	Promoter (<=1kb)	1	160370231	160398468	57216	0	ENSG00000162738	VANGL2	VANGL planar cell polarity protein 2
chr1	161015604	161016233	630	224	6.26443	26.1178	22.4233	Promoter (<=1kb)	1	161009041	161015769	7391	0	ENSG00000158773	USF1	upstream transcription factor 1
chr1	161087613	161088023	411	475	7.11367	51.5152	47.5825	Promoter (<=1kb)	1	161087862	161090984	4817	0	ENSG00000158793	NIT1	nitrilase 1
chr1	161102112	161102836	725	4527	41.4107	458.263	452.782	Promoter (<=1kb)	1	161090769	161102256	9191	0	ENSG00000158796	DEDD	death effector domain containing
chr1	161123679	161123888	210	99	4.59762	13.438	9.95372	Promoter (<=1kb)	1	161123534	161128646	51506	145	ENSG00000143222	UFC1	ubiquitin-fold modifier conjugating enzyme 1
chr1	161129076	161129707	632	3739	39.6885	379.305	373.989	Promoter (<=1kb)	1	161129254	161135516	27005	0	ENSG00000143258	USP21	ubiquitin specific peptidase 21
chr1	161147011	161147497	487	3134	29.1418	318.65	313.484	Promoter (<=1kb)	1	161141100	161147758	8703	261	ENSG00000158850	B4GALT3	beta-1,4-galactosyltransferase 3
chr1	161171870	161172396	527	3070	24.2308	312.23	307.078	Promoter (<=1kb)	1	161171937	161180839	4720	0	ENSG00000158864	NDUFS2	NADH:ubiquinone oxidoreductase core subunit S2
chr1	161190454	161190801	348	50	5.13991	8.3257	5.00118	Promoter (2-3kb)	1	161192083	161193215	336	2414	ENSG00000158874	APOA2	apolipoprotein A2
chr1	161195582	161196023	442	772	15.5657	81.401	77.2671	Promoter (<=1kb)	1	161195833	161197779	84134	0	ENSG00000158882	TOMM40L	translocase of outer mitochondrial membrane 40 like
chr1	161283980	161284377	398	1085	13.2327	112.906	108.586	Promoter (<=1kb)	1	161284166	161334535	6391	0	ENSG00000143252	SDHC	succinate dehydrogenase complex subunit C
chr1	161719362	161720019	658	1560	14.5148	160.633	156.048	Promoter (<=1kb)	1	161719581	161726952	11266	0	ENSG00000081721	DUSP12	dual specificity phosphatase 12
chr1	162467490	162467971	482	500	8.28168	54.0025	50.0508	Promoter (<=1kb)	1	162467595	162499419	127933	0	ENSG00000152332	UHMK1	U2AF homology motif kinase 1
chr1	165797031	165797280	250	42	3.34285	7.59439	4.29719	Promoter (<=1kb)	1	165693528	165796992	54499	-39	ENSG00000143183	TMCO1	transmembrane and coiled-coil domains 1
chr1	166845221	166845716	496	321	6.3408	36.0016	32.2	Promoter (<=1kb)	1	166825749	166845654	117143	0	ENSG00000152382	TADA1	transcriptional adaptor 1
chr1	167189920	167190686	767	548	9.78203	58.8467	54.8602	Promoter (<=1kb)	1	167190066	167365664	5451	0	ENSG00000143190	POU2F1	POU class 2 homeobox 1
chr1	167522816	167523126	311	88	4.41854	12.2796	8.82583	Promoter (<=1kb)	1	167510251	167523056	8804	0	ENSG00000143162	CREG1	cellular repressor of E1A stimulated genes 1
chr1	167905221	167905755	535	3791	34.8046	384.492	379.163	Promoter (<=1kb)	1	167885913	167905439	25874	0	ENSG00000143158	MPC2	mitochondrial pyruvate carrier 2
chr1	169862942	169863543	602	558	10.8538	59.8081	55.815	Promoter (<=1kb)	1	169822215	169863100	57147	0	ENSG00000000457	SCYL3	SCY1 like pseudokinase 3
chr1	172502196	172502570	375	259	5.97312	29.6412	25.9044	Promoter (<=1kb)	1	172502260	172572423	51430	0	ENSG00000094975	SUCO	SUN domain containing ossification factor
chr1	173991224	173991585	362	219	6.24022	25.6014	21.9147	Distal Intergenic	1	173907795	173962210	149041	-29014	ENSG00000135870	RC3H1	ring finger and CCCH-type domains 1
chr1	174992370	174992709	340	196	4.96981	23.2844	19.6283	Promoter (<=1kb)	1	174982094	174992591	63931	0	ENSG00000120333	MRPS14	mitochondrial ribosomal protein S14
chr1	177953440	177953659	220	79	6.31282	11.3568	7.92535	Promoter (<=1kb)	1	177897489	177953553	89866	0	ENSG00000120341	SEC16B	SEC16 homolog B, endoplasmic reticulum export factor
chr1	178694487	178695221	735	232	7.41211	26.9913	23.2858	Promoter (<=1kb)	1	178694300	178889237	55103	187	ENSG00000116191	RALGPS2	Ral GEF with PH domain and SH3 binding motif 2
chr1	178994979	178995413	435	62	4.46137	9.59781	6.22117	Promoter (<=1kb)	1	178995074	179045702	9917	0	ENSG00000116199	FAM20B	FAM20B, glycosaminoglycan xylosylkinase
chr1	179198380	179199044	665	2311	26.6238	236.054	231.141	Promoter (<=1kb)	1	179068462	179198819	27	0	ENSG00000143322	ABL2	ABL proto-oncogene 2, non-receptor tyrosine kinase
chr1	179851434	179851930	497	2175	20.4722	222.38	217.523	Promoter (<=1kb)	1	179851177	179889212	26092	257	ENSG00000143337	TOR1AIP1	torsin 1A interacting protein 1
chr1	179923590	179924256	667	3453	35.5386	350.58	345.331	Promoter (<=1kb)	1	179923908	179966310	9857	0	ENSG00000135837	CEP350	centrosomal protein 350
chr1	180601001	180601371	371	231	5.80834	26.8962	23.1916	Promoter (<=1kb)	1	180601146	180805872	9213	0	ENSG00000143324	XPR1	xenotropic and polytropic retrovirus receptor 1
chr1	182083406	182083699	294	83	6.31348	11.7525	8.31121	Distal Intergenic	1	182023705	182030847	127665	-52559	ENSG00000179930	ZNF648	zinc finger protein 648
chr1	182360906	182361190	285	207	5.90582	24.4131	20.7419	Promoter (<=1kb)	1	182350839	182360924	2752	0	ENSG00000135821	GLUL	glutamate-ammonia ligase
chr1	182808374	182808635	262	58	3.22359	9.16391	5.80546	Promoter (<=1kb)	1	182808439	182857117	1660	0	ENSG00000135829	DHX9	DExH-box helicase 9
chr1	183441410	183441928	519	949	12.5875	99.1578	94.9201	Promoter (<=1kb)	1	183441506	183515472	9887	0	ENSG00000116698	SMG7	SMG7, nonsense mediated mRNA decay factor
chr1	184006370	184006690	321	107	4.45738	14.2726	10.7705	Promoter (<=1kb)	1	183898796	184006863	23127	173	ENSG00000198756	COLGALT2	collagen beta(1-O)galactosyltransferase 2
chr1	184020705	184021224	520	117	4.78083	15.3227	11.7991	Promoter (<=1kb)	1	184020811	184043344	116461	0	ENSG00000198860	TSEN15	tRNA splicing endonuclease subunit 15
chr1	185014520	185015133	614	304	7.10865	34.2349	30.4496	Promoter (<=1kb)	1	185014551	185071740	6045	0	ENSG00000121481	RNF2	ring finger protein 2
chr1	185125547	185125868	322	80	3.72025	11.4429	8.00985	Promoter (<=1kb)	1	185087218	185126116	81627	248	ENSG00000121486	TRMT1L	tRNA methyltransferase 1 like
chr1	186343996	186344303	308	130	5.74583	16.6231	13.0742	Promoter (<=1kb)	1	186280786	186344457	7175	154	ENSG00000047410	TPR	translocated promoter region, nuclear basket protein
chr1	186344702	186344961	260	109	4.24446	14.4501	10.9451	Promoter (<=1kb)	1	186344890	186390503	54953	0	ENSG00000157181	ODR4	odr-4 GPCR localization factor homolog
chr1	192777691	192777995	305	33	2.93373	6.58871	3.35022	Promoter (<=1kb)	1	192778169	192781407	5997	-174	ENSG00000116741	RGS2	regulator of G protein signaling 2
chr1	193090968	193091458	491	275	7.52337	31.2902	27.536	Promoter (<=1kb)	1	193091088	193223942	79577	0	ENSG00000134371	CDC73	cell division cycle 73
chr1	197743947	197744154	208	38	3.04656	7.13054	3.85857	Promoter (<=1kb)	1	197473879	197744623	163486	469	ENSG00000213047	DENND1B	DENN domain containing 1B
chr1	197871551	197872047	497	550	9.00709	59.0265	55.0384	Promoter (<=1kb)	1	197871682	197876497	388722	0	ENSG00000203724	C1orf53	chromosome 1 open reading frame 53
chr1	200638449	200638854	406	15	2.52987	4.57733	1.50107	Promoter (<=1kb)	1	200610119	200639126	83479	272	ENSG00000118197	DDX59	DEAD-box helicase 59
chr1	200708361	200708885	525	42	3.00431	7.57307	4.27658	Promoter (<=1kb)	1	200708686	200829831	23271	0	ENSG00000118200	CAMSAP2	calmodulin regulated spectrin associated protein family member 2
chr1	201798084	201798584	501	1805	24.6599	185.236	180.536	Promoter (<=1kb)	1	201798288	201853422	55705	0	ENSG00000198700	IPO9	importin 9
chr1	201951672	201951975	304	186	6.13015	22.2474	18.6056	Promoter (<=1kb)	1	201951766	201975275	6051	0	ENSG00000176393	RNPEP	arginyl aminopeptidase
chr1	202102299	202102515	217	120	4.02726	15.6137	12.0832	Downstream (<1kb)	1	202092029	202098634	9283	10270	ENSG00000170075	GPR37L1	G protein-coupled receptor 37 like 1
chr1	202317640	202318199	560	1548	14.8256	159.448	154.869	Promoter (<=1kb)	1	202317830	202407370	4660	0	ENSG00000077157	PPP1R12B	protein phosphatase 1 regulatory subunit 12B
chr1	202776396	202777017	622	888	14.4396	93.0273	88.8246	Promoter (<=1kb)	1	202698835	202776427	10765	0	ENSG00000117139	KDM5B	lysine demethylase 5B
chr1	202995260	202995713	454	1460	17.8267	150.551	146.017	Distal Intergenic	1	203003612	203047864	8497	-7899	ENSG00000143847	PPFIA4	PTPRF interacting protein alpha 4
chr1	203764542	203765048	507	1489	14.0836	153.499	148.951	Promoter (<=1kb)	1	203764751	203823256	9877	0	ENSG00000058673	ZC3H11A	zinc finger CCCH-type containing 11A
chr1	204320044	204320455	412	1180	13.5385	122.419	118.043	Intron (uc001hau.4/22874, intron 1 of 22)	1	204187979	204329057	22874	8602	ENSG00000143850	PLEKHA6	pleckstrin homology domain containing A6
chr1	204380692	204381188	497	2923	29.3032	297.448	292.338	Promoter (<=1kb)	1	204372492	204380944	84919	0	ENSG00000158615	PPP1R15B	protein phosphatase 1 regulatory subunit 15B
chr1	204485438	204485698	261	122	4.14084	15.81	12.2762	Promoter (<=1kb)	1	204485507	204518786	4194	0	ENSG00000198625	MDM4	MDM4, p53 regulator
chr1	205329479	205329747	269	23	3.43279	5.5652	2.39543	Distal Intergenic	1	205305193	205326218	55220	-3261	ENSG00000162873	KLHDC8A	kelch domain containing 8A
chr1	205498183	205498625	443	474	7.26305	51.3809	47.449	Exon (uc001hcp.3/5129, exon 11 of 16)	1	205492611	205499477	5129	5572	ENSG00000117266	CDK18	cyclin dependent kinase 18
chr1	206785564	206786041	478	2314	19.9317	236.356	231.442	Promoter (<=1kb)	1	206764974	206785904	1939	0	ENSG00000143486	EIF2D	eukaryotic translation initiation factor 2D
chr1	207224107	207224468	362	521	9.99899	56.0674	52.1004	Promoter (<=1kb)	1	207217194	207224422	55432	0	ENSG00000180667	YOD1	YOD1 deubiquitinase
chr1	207925410	207925748	339	136	4.06451	17.1942	13.6346	Promoter (<=1kb)	1	207925383	207968861	4179	27	ENSG00000117335	CD46	CD46 molecule
chr1	208136731	208137063	333	192	5.30762	22.9165	19.2653	Distal Intergenic	1	208059883	208084683	947	-52048	ENSG00000174059	CD34	CD34 molecule
chr1	210111528	210111779	252	47	3.89161	8.01723	4.70377	Promoter (<=1kb)	1	210111519	210337633	255928	9	ENSG00000143469	SYT14	synaptotagmin 14
chr1	211432572	211433000	429	256	7.08684	29.3805	25.6476	Promoter (<=1kb)	1	211432708	211486303	55758	0	ENSG00000117625	RCOR3	REST corepressor 3
chr1	211556121	211556372	252	72	3.72358	10.6868	7.27575	Promoter (<=1kb)	1	211556097	211605877	84791	24	NA	LINC00467	long intergenic non-protein coding RNA 467
chr1	211751589	211751849	261	91	3.69075	12.6033	9.13992	Promoter (<=1kb)	1	211748381	211752099	7779	250	ENSG00000170385	SLC30A1	solute carrier family 30 member 1
chr1	212003383	212003593	211	24	2.7708	5.57119	2.40024	Promoter (<=1kb)	1	211916799	212003577	9926	0	ENSG00000123684	LPGAT1	lysophosphatidylglycerol acyltransferase 1
chr1	212208733	212209031	299	233	5.96167	27.1025	23.3959	Promoter (<=1kb)	1	212113741	212209002	25896	0	ENSG00000143493	INTS7	integrator complex subunit 7
chr1	212459271	212459543	273	48	3.18335	8.18063	4.86043	Promoter (<=1kb)	1	212458879	212535205	5525	392	ENSG00000066027	PPP2R5A	protein phosphatase 2 regulatory subunit B'alpha
chr1	212606203	212606498	296	45	3.3595	7.86547	4.55767	Promoter (<=1kb)	1	212606229	212619721	29937	0	ENSG00000117691	NENF	neudesin neurotrophic factor
chr1	212964869	212965294	426	275	5.72267	31.3497	27.594	Promoter (<=1kb)	1	212965170	212990167	128387	0	ENSG00000203705	TATDN3	TatD DNase domain containing 3
chr1	213031318	213031623	306	182	4.35129	21.8813	18.2456	Promoter (<=1kb)	1	213031597	213072705	28982	0	ENSG00000162769	FLVCR1	feline leukemia virus subgroup C cellular receptor 1
chr1	213189052	213189364	313	189	6.11167	22.6121	18.9655	Promoter (<=1kb)	1	213165524	213189168	90806	0	ENSG00000174606	ANGEL2	angel homolog 2
chr1	213562769	213563010	242	69	3.41321	10.313	6.91621	Distal Intergenic	1	213246212	213446808	26750	316557	ENSG00000136643	RPS6KC1	ribosomal protein S6 kinase C1
chr1	214078797	214079041	245	39	3.13221	7.19373	3.91909	Intron (uc031psa.1/uc031psa.1, intron 1 of 4)	1	214098092	214099996	100861504	-19051	NA	LINC00538	long intergenic non-protein coding RNA 538
chr1	219347024	219347480	457	679	12.8176	71.9922	67.9164	Promoter (<=1kb)	1	219347192	219386207	127018	0	ENSG00000143353	LYPLAL1	lysophospholipase like 1
chr1	220701384	220702410	1027	917	13.6531	95.9314	91.7125	Promoter (<=1kb)	1	220701568	220756240	4139	0	ENSG00000116141	MARK1	microtubule affinity regulating kinase 1
chr1	220863551	220863933	383	78	4.27444	11.2607	7.83482	Promoter (<=1kb)	1	220863628	220872499	79762	0	ENSG00000162817	C1orf115	chromosome 1 open reading frame 115
chr1	222791389	222791743	355	558	10.5227	59.8729	55.8792	Promoter (<=1kb)	1	222791444	222841351	375056	0	ENSG00000154305	MIA3	MIA family member 3, ER export factor
chr1	222885689	222886325	637	3979	42.005	403.36	397.989	Promoter (<=1kb)	1	222885906	222887245	148362	0	ENSG00000162819	BROX	BRO1 domain and CAAX motif containing
chr1	223900171	223900444	274	59	3.39557	9.33546	5.97119	Promoter (<=1kb)	1	223900119	223963720	824	52	ENSG00000162909	CAPN2	calpain 2
chr1	224033843	224034280	438	180	5.81453	21.6486	18.0168	Promoter (<=1kb)	1	223967595	224033674	7159	-169	ENSG00000143514	TP53BP2	tumor protein p53 binding protein 2
chr1	224301655	224302188	534	1396	13.5088	144.112	139.611	Promoter (<=1kb)	1	224301789	224349749	23219	0	ENSG00000143756	FBXO28	F-box protein 28
chr1	225616260	225616478	219	103	4.52241	13.8503	10.3576	Promoter (<=1kb)	1	225589204	225616557	3930	79	ENSG00000143815	LBR	lamin B receptor
chr1	225965283	225965710	428	1405	14.7154	145.07	140.565	Promoter (<=1kb)	1	225965515	225978162	6726	0	ENSG00000143742	SRP9	signal recognition particle 9
chr1	226111805	226112153	349	223	6.13742	26.0904	22.3966	Promoter (<=1kb)	1	226073982	226112040	10637	0	ENSG00000243709	LEFTY1	left-right determination factor 1
chr1	226186851	226187191	341	272	5.82668	31.0394	27.2875	Promoter (<=1kb)	1	226170403	226187066	163859	0	ENSG00000143751	SDE2	SDE2 telomere maintenance homolog
chr1	226249454	226249925	472	123	3.90818	15.9091	12.3733	Promoter (<=1kb)	1	226250408	226254301	3020	-483	ENSG00000163041	H3F3A	H3 histone family member 3A
chr1	226250210	226250969	760	610	9.57596	65.1103	61.0804	Promoter (<=1kb)	1	226250408	226254301	3020	0	ENSG00000163041	H3F3A	H3 histone family member 3A
chr1	226374186	226374520	335	208	6.17019	24.5031	20.8303	Promoter (<=1kb)	1	226332380	226374423	64746	0	ENSG00000182827	ACBD3	acyl-CoA binding domain containing 3
chr1	226496388	226497036	649	1213	17.2524	125.719	121.324	Promoter (<=1kb)	1	226418850	226497204	286826	168	ENSG00000183814	LIN9	lin-9 DREAM MuvB core complex component
chr1	226595642	226595997	356	38	3.04656	7.13054	3.85857	Promoter (<=1kb)	1	226548392	226595801	142	0	ENSG00000143799	PARP1	poly(ADP-ribose) polymerase 1
chr1	227505895	227506503	609	2416	27.508	246.638	241.687	Promoter (<=1kb)	1	227177566	227505826	8476	-69	ENSG00000143776	CDC42BPA	CDC42 binding protein kinase alpha
chr1	227751308	227751740	433	943	15.1178	98.5526	94.3182	Promoter (<=1kb)	1	227751220	227910352	339500	88	ENSG00000181450	ZNF678	zinc finger protein 678
chr1	228270201	228270814	614	1494	17.6667	154.032	149.481	Promoter (<=1kb)	1	228270361	228286913	375	0	ENSG00000143761	ARF1	ADP ribosylation factor 1
chr1	228290609	228290998	390	56	3.17224	8.97349	5.62126	Promoter (<=1kb)	1	228288428	228291022	79169	24	ENSG00000143793	C1orf35	chromosome 1 open reading frame 35
chr1	228353304	228353757	454	1566	17.9572	161.229	156.641	Promoter (<=1kb)	1	228353429	228369958	200205	0	ENSG00000181873	IBA57	IBA57, iron-sulfur cluster assembly
chr1	228593902	228594338	437	124	4.77193	15.9675	12.4313	Promoter (<=1kb)	1	228581377	228594517	81559	179	ENSG00000154370	TRIM11	tripartite motif containing 11
chr1	229406924	229407316	393	137	4.66891	17.2707	13.7097	Promoter (<=1kb)	1	229406809	229441640	5867	115	ENSG00000168118	RAB4A	RAB4A, member RAS oncogene family
chr1	229478658	229478886	229	93	4.21644	12.8692	9.39932	Promoter (<=1kb)	1	229456752	229478688	126731	0	ENSG00000154429	CCSAP	centriole, cilia and spindle associated protein
chr1	229643986	229644324	339	382	9.05591	42.1532	38.2957	Promoter (<=1kb)	1	229577044	229644088	55746	0	ENSG00000069248	NUP133	nucleoporin 133
chr1	230778030	230778485	456	710	11.6162	75.1102	71.0148	Promoter (<=1kb)	1	230778202	230829731	22796	0	ENSG00000135775	COG2	component of oligomeric golgi complex 2
chr1	231003940	231004455	516	1016	18.033	105.926	101.648	Promoter (<=1kb)	1	230972865	231004302	84886	0	ENSG00000119280	C1orf198	chromosome 1 open reading frame 198
chr1	231376870	231377136	267	299	5.96792	33.7735	29.993	Promoter (<=1kb)	1	231359509	231376924	128061	0	ENSG00000143633	C1orf131	chromosome 1 open reading frame 131
chr1	231558072	231558576	505	369	7.64003	40.7549	36.91	Promoter (2-3kb)	1	231499497	231556057	54583	-2015	ENSG00000135766	EGLN1	egl-9 family hypoxia inducible factor 1
chr1	232940993	232941381	389	520	10.8671	56.0175	52.0513	Promoter (<=1kb)	1	232940638	232946092	54627	355	ENSG00000212916	MAP10	microtubule associated protein 10
chr1	233431312	233431582	271	109	4.24446	14.4501	10.9451	Promoter (<=1kb)	1	233119882	233431459	80003	0	ENSG00000135749	PCNX2	pecanex homolog 2
chr1	234614363	234615029	667	82	5.10412	11.6887	8.24902	Promoter (<=1kb)	1	234527059	234614849	6894	0	ENSG00000059588	TARBP1	TAR (HIV-1) RNA binding protein 1
chr1	234742992	234743213	222	35	3.2044	6.77922	3.52302	Promoter (<=1kb)	1	234740015	234743860	359948	647	ENSG00000168264	IRF2BP2	interferon regulatory factor 2 binding protein 2
chr1	234745140	234745424	285	118	5.8809	15.3519	11.8278	Promoter (<=1kb)	1	234740015	234745271	359948	0	ENSG00000168264	IRF2BP2	interferon regulatory factor 2 binding protein 2
chr1	235491612	235491885	274	90	4.49262	12.4927	9.03145	Promoter (<=1kb)	1	235491753	235507844	9453	0	ENSG00000152904	GGPS1	geranylgeranyl diphosphate synthase 1
chr1	236228377	236228776	400	518	11.202	55.8214	51.8569	Promoter (<=1kb)	1	236139132	236228481	4811	0	ENSG00000116962	NID1	nidogen 1
chr1	236876965	236878322	1358	201	10.3976	23.7914	20.1281	Intron (uc001hyf.2/88, intron 1 of 20)	1	236894533	236927558	88	-16211	ENSG00000077522	ACTN2	actinin alpha 2
chr1	243417757	243417973	217	15	2.40345	4.62127	1.53712	Promoter (<=1kb)	1	243287730	243418708	9859	735	ENSG00000143702	CEP170	centrosomal protein 170
chr1	244815979	244816482	504	2100	27.4464	214.877	210.052	Promoter (<=1kb)	1	244816352	244872334	51029	0	ENSG00000121644	DESI2	desumoylating isopeptidase 2
chr1	244998188	244999273	1086	1747	24.1027	179.422	174.748	Promoter (<=1kb)	1	244998639	245008359	116228	0	ENSG00000203667	COX20	COX20, cytochrome c oxidase assembly factor
chr1	245026496	245026799	304	168	5.94186	20.4158	16.8017	Promoter (1-2kb)	1	245013602	245027827	3192	1028	ENSG00000153187	HNRNPU	heterogeneous nuclear ribonucleoprotein U
chr1	245027854	245028156	303	114	4.87626	14.9371	11.4213	Promoter (<=1kb)	1	245013602	245027827	3192	-27	ENSG00000153187	HNRNPU	heterogeneous nuclear ribonucleoprotein U
chr1	245133499	245134715	1217	992	15.6346	103.548	99.2845	Promoter (<=1kb)	1	245133631	245251148	84288	0	ENSG00000203666	EFCAB2	EF-hand calcium binding domain 2
chr1	245836531	245836765	235	45	3.3595	7.86547	4.55767	Intron (uc001ibf.1/55083, intron 10 of 14)	1	245809394	245852109	55083	27137	ENSG00000162849	KIF26B	kinesin family member 26B
chr1	246887568	246887940	373	107	4.45738	14.2726	10.7705	Promoter (<=1kb)	1	246887378	246931440	51097	190	ENSG00000143653	SCCPDH	saccharopine dehydrogenase (putative)
chr1	247094452	247094704	253	60	3.92985	9.45922	6.08689	Promoter (<=1kb)	1	247002402	247094726	25909	22	ENSG00000153207	AHCTF1	AT-hook containing transcription factor 1
chr1	247494833	247495229	397	36	3.10285	6.90442	3.64414	Promoter (<=1kb)	1	247463622	247495045	84838	0	ENSG00000162714	ZNF496	zinc finger protein 496
chr1	247611277	247611689	413	787	14.8125	82.9439	78.7998	Intron (uc001icr.3/114548, intron 10 of 10)	1	247614331	247615284	127623	3595	ENSG00000177535	OR2B11	olfactory receptor family 2 subfamily B member 11
chr1	249120150	249120633	484	1050	11.8809	109.314	105.016	Promoter (<=1kb)	1	249120576	249120642	100422879	0	ENSG00000264500	MIR3124	microRNA 3124
chr10	180916	181645	730	364	10.6949	40.291	36.4498	Promoter (<=1kb)	10	181424	300577	10771	0	ENSG00000015171	ZMYND11	zinc finger MYND-type containing 11
chr10	735416	735627	212	34	3.65021	6.71288	3.45884	Promoter (<=1kb)	10	320130	735608	22982	0	ENSG00000151240	DIP2C	disco interacting protein 2 homolog C
chr10	976985	977602	618	142	5.59248	17.7797	14.2102	Promoter (<=1kb)	10	852854	977645	23185	43	ENSG00000107929	LARP4B	La ribonucleoprotein domain family member 4B
chr10	1102744	1102987	244	69	3.79307	10.3946	6.99185	Promoter (<=1kb)	10	1102776	1178237	22884	0	ENSG00000047056	WDR37	WD repeat domain 37
chr10	5454348	5454761	414	772	16.385	81.3744	77.2406	Promoter (<=1kb)	10	5454514	5501019	10276	0	ENSG00000173848	NET1	neuroepithelial cell transforming 1
chr10	5855163	5855826	664	830	16.1865	87.1869	83.0176	Promoter (<=1kb)	10	5807186	5855512	2665	0	ENSG00000057608	GDI2	GDP dissociation inhibitor 2
chr10	6019361	6019593	233	84	4.62471	11.8939	8.44923	Promoter (<=1kb)	10	5994334	6019574	3601	0	ENSG00000134470	IL15RA	interleukin 15 receptor subunit alpha
chr10	7452798	7453019	222	54	4.00467	8.82801	5.48128	Promoter (<=1kb)	10	7200586	7453448	57713	429	ENSG00000198879	SFMBT2	Scm like with four mbt domains 2
chr10	7860254	7860802	549	1668	21.2027	171.495	166.857	Promoter (<=1kb)	10	7860467	8057016	83860	0	ENSG00000165632	TAF3	TATA-box binding protein associated factor 3
chr10	11653197	11654046	850	2143	37.7202	219.16	214.317	Promoter (<=1kb)	10	11502509	11653679	9712	0	ENSG00000148429	USP6NL	USP6 N-terminal like
chr10	12110820	12111060	241	40	3.58424	7.29416	4.01576	Promoter (<=1kb)	10	12110916	12165227	55526	0	ENSG00000181192	DHTKD1	dehydrogenase E1 and transketolase domain containing 1
chr10	12390937	12391307	371	34	3.64855	6.70933	3.45587	Promoter (<=1kb)	10	12391583	12868137	57118	-276	ENSG00000183049	CAMK1D	calcium/calmodulin dependent protein kinase ID
chr10	13203371	13203589	219	50	3.37315	8.35602	5.03035	Promoter (<=1kb)	10	13203554	13253104	55388	0	ENSG00000065328	MCM10	minichromosome maintenance 10 replication initiation factor
chr10	13341940	13342167	228	52	3.92559	8.635	5.2935	Promoter (<=1kb)	10	13319796	13342130	5264	0	ENSG00000107537	PHYH	phytanoyl-CoA 2-hydroxylase
chr10	14880253	14880805	553	71	4.12705	10.5571	7.15005	Promoter (<=1kb)	10	14861251	14880574	441549	0	ENSG00000185267	CDNF	cerebral dopamine neurotrophic factor
chr10	14920647	14921210	564	1029	17.3926	107.214	102.928	Promoter (<=1kb)	10	14920782	14946304	79723	0	ENSG00000152455	SUV39H2	suppressor of variegation 3-9 homolog 2
chr10	15209824	15210790	967	381	13.8813	41.9645	38.1085	Promoter (<=1kb)	10	15147771	15210695	9397	0	ENSG00000152465	NMT2	N-myristoyltransferase 2
chr10	21814855	21815126	272	90	4.87525	12.5368	9.07453	Promoter (<=1kb)	10	21802409	21814611	387640	-244	ENSG00000180592	SKIDA1	SKI/DACH domain containing 1
chr10	22517910	22518152	243	79	6.31282	11.3568	7.92535	Distal Intergenic	10	22497743	22498912	340900	-18998	ENSG00000223601	EBLN1	endogenous Bornavirus like nucleoprotein 1
chr10	22609823	22610746	924	1411	32.2327	145.664	141.155	Promoter (<=1kb)	10	22610139	22620414	648	0	ENSG00000168283	BMI1	BMI1 proto-oncogene, polycomb ring finger
chr10	25241373	25241775	403	68	4.12017	10.251	6.85566	Promoter (<=1kb)	10	25137554	25241533	56952	0	ENSG00000099256	PRTFDC1	phosphoribosyl transferase domain containing 1
chr10	27443069	27443326	258	58	3.76169	9.26059	5.8988	Promoter (<=1kb)	10	27399040	27443349	10730	23	ENSG00000136758	YME1L1	YME1 like 1 ATPase
chr10	28821592	28821836	245	43	3.07723	7.62382	4.32509	Promoter (<=1kb)	10	28808846	28821460	220906	-132	NA	WAC-AS1	WAC antisense RNA 1 (head to head)
chr10	28822291	28822860	570	862	15.4764	90.4838	86.2956	Promoter (<=1kb)	10	28822421	28897360	51322	0	ENSG00000095787	WAC	WW domain containing adaptor with coiled-coil
chr10	28966476	28966689	214	32	3.56495	6.52972	3.29413	Promoter (<=1kb)	10	28966424	28971868	25805	52	ENSG00000095739	BAMBI	BMP and activin membrane bound inhibitor
chr10	29698452	29698921	470	222	6.46059	25.918	22.2261	Promoter (<=1kb)	10	29698483	29711299	387647	0	NA	PTCHD3P1	patched domain containing 3 pseudogene 1
chr10	31070556	31070794	239	57	3.61793	9.09627	5.73998	Distal Intergenic	10	30900708	30918647	119180	-151909	ENSG00000151033	LYZL2	lysozyme like 2
chr10	31608124	31608630	507	219	8.98216	25.6224	21.9349	Promoter (<=1kb)	10	31608101	31818742	6935	23	ENSG00000148516	ZEB1	zinc finger E-box binding homeobox 1
chr10	32344492	32345366	875	896	15.3254	93.8685	89.6607	Promoter (<=1kb)	10	32297938	32345371	3799	5	ENSG00000170759	KIF5B	kinesin family member 5B
chr10	32635189	32636373	1185	2242	24.9367	229.184	224.297	Promoter (<=1kb)	10	32556644	32636146	80314	0	ENSG00000120616	EPC1	enhancer of polycomb homolog 1
chr10	35103576	35103991	416	212	6.86695	24.9296	21.2508	Promoter (<=1kb)	10	34398488	35104253	56288	262	ENSG00000148498	PARD3	par-3 family cell polarity regulator
chr10	35379043	35379384	342	248	6.84822	28.5836	24.8587	Promoter (<=1kb)	10	35297479	35379311	8453	0	ENSG00000108094	CUL2	cullin 2
chr10	35625493	35625733	241	97	5.82011	13.2198	9.7427	Promoter (<=1kb)	10	35625802	35860847	219771	-69	ENSG00000108100	CCNY	cyclin Y
chr10	35930721	35931283	563	85	5.06743	11.9588	8.51339	Promoter (<=1kb)	10	35927177	35930362	8325	-359	ENSG00000177283	FZD8	frizzled class receptor 8
chr10	38265099	38265856	758	787	14.8125	82.9439	78.7998	Promoter (<=1kb)	10	38238795	38265453	219749	0	ENSG00000175395	ZNF25	zinc finger protein 25
chr10	39107195	39107411	217	309	5.67656	34.7037	30.9143	Distal Intergenic	10	38989727	38991371	399746	117468	NA	ACTR3BP5	ACTR3B pseudogene 5
chr10	42378267	42378478	212	50	2.69202	8.40648	5.07954	Distal Intergenic	10	42827314	42863493	441666	485015	ENSG00000215146	LOC441666	zinc finger protein 91 pseudogene
chr10	42396774	42396981	208	1323	2.02163	136.84	132.38	Distal Intergenic	10	42827314	42863493	441666	466512	ENSG00000215146	LOC441666	zinc finger protein 91 pseudogene
chr10	42398549	42398791	243	673	1.56369	71.4224	67.3501	Distal Intergenic	10	42827314	42863493	441666	464702	ENSG00000215146	LOC441666	zinc finger protein 91 pseudogene
chr10	42399253	42399481	229	1363	2.40349	140.863	136.379	Distal Intergenic	10	42827314	42863493	441666	464012	ENSG00000215146	LOC441666	zinc finger protein 91 pseudogene
chr10	42408181	42408403	223	881	5.87398	92.3015	88.1036	Distal Intergenic	10	42827314	42863493	441666	455090	ENSG00000215146	LOC441666	zinc finger protein 91 pseudogene
chr10	42534529	42534776	248	1225	2.87222	126.973	122.57	Distal Intergenic	10	42827314	42863493	441666	328717	ENSG00000215146	LOC441666	zinc finger protein 91 pseudogene
chr10	42611088	42611334	247	45	4.65657	7.81794	4.51231	Distal Intergenic	10	42827314	42863493	441666	252159	ENSG00000215146	LOC441666	zinc finger protein 91 pseudogene
chr10	42623550	42623829	280	99	7.05551	13.4379	9.95372	Distal Intergenic	10	42827314	42863493	441666	239664	ENSG00000215146	LOC441666	zinc finger protein 91 pseudogene
chr10	42625312	42626208	897	189	10.0262	22.5719	18.9256	Distal Intergenic	10	42827314	42863493	441666	237285	ENSG00000215146	LOC441666	zinc finger protein 91 pseudogene
chr10	42627585	42627823	239	69	5.94148	10.3523	6.9518	Distal Intergenic	10	42827314	42863493	441666	235670	ENSG00000215146	LOC441666	zinc finger protein 91 pseudogene
chr10	42647702	42647949	248	88	5.39621	12.3256	8.87008	Distal Intergenic	10	42827314	42863493	441666	215544	ENSG00000215146	LOC441666	zinc finger protein 91 pseudogene
chr10	42649027	42649278	252	83	5.29533	11.7433	8.30227	Distal Intergenic	10	42827314	42863493	441666	214215	ENSG00000215146	LOC441666	zinc finger protein 91 pseudogene
chr10	42651814	42652039	226	89	6.68417	12.3857	8.92713	Distal Intergenic	10	42827314	42863493	441666	211454	ENSG00000215146	LOC441666	zinc finger protein 91 pseudogene
chr10	42653335	42653985	651	79	6.31282	11.3568	7.92535	Distal Intergenic	10	42827314	42863493	441666	209508	ENSG00000215146	LOC441666	zinc finger protein 91 pseudogene
chr10	42660635	42660874	240	69	5.94148	10.3523	6.9518	Distal Intergenic	10	42827314	42863493	441666	202619	ENSG00000215146	LOC441666	zinc finger protein 91 pseudogene
chr10	42817848	42818230	383	68	3.33068	10.2221	6.82713	Distal Intergenic	10	42827314	42863493	441666	45263	ENSG00000215146	LOC441666	zinc finger protein 91 pseudogene
chr10	43932111	43932509	399	275	7.52337	31.2902	27.536	Promoter (<=1kb)	10	43932574	43978007	642819	-65	ENSG00000243660	ZNF487	zinc finger protein 487
chr10	47395836	47396046	211	32	3.45906	6.52958	3.29413	Promoter (<=1kb)	10	47396659	47421238	439965	-613	NA	FAM35DP	family with sequence similarity 35, member A pseudogene
chr10	52384538	52384912	375	474	8.80726	51.3906	47.4584	Promoter (<=1kb)	10	52065345	52384923	259230	11	ENSG00000198964	SGMS1	sphingomyelin synthase 1
chr10	53459493	53459781	289	161	8.76385	19.7896	16.1866	Promoter (<=1kb)	10	53455246	53459355	23283	-138	ENSG00000177613	CSTF2T	cleavage stimulation factor subunit 2 tau variant
chr10	57390921	57391168	248	60	3.92985	9.45922	6.08689	Distal Intergenic	10	55580939	57387702	65217	-3219	ENSG00000150275	PCDH15	protocadherin related 15
chr10	60094720	60094975	256	15	2.64711	4.5857	1.50734	Promoter (<=1kb)	10	60094739	60130513	7321	0	ENSG00000072401	UBE2D1	ubiquitin conjugating enzyme E2 D1
chr10	60272811	60273019	209	83	3.82002	11.7991	8.35629	Promoter (<=1kb)	10	60272904	60588845	80114	0	ENSG00000122870	BICC1	BicC family RNA binding protein 1
chr10	61666038	61666385	348	334	7.9331	37.2509	33.4364	Promoter (<=1kb)	10	61548506	61666414	8030	29	ENSG00000108091	CCDC6	coiled-coil domain containing 6
chr10	64564668	64565100	433	214	6.78015	25.1316	21.4503	Promoter (<=1kb)	10	64564516	64568239	84890	152	ENSG00000181915	ADO	2-aminoethanethiol dioxygenase
chr10	69644200	69644748	549	631	13.5438	67.1437	63.1006	Promoter (<=1kb)	10	69644427	69678147	23411	0	ENSG00000096717	SIRT1	sirtuin 1
chr10	70091198	70091528	331	72	3.72358	10.6868	7.27575	Promoter (<=1kb)	10	70091768	70102953	3189	-240	ENSG00000096746	HNRNPH3	heterogeneous nuclear ribonucleoprotein H3
chr10	70092026	70092661	636	286	5.70595	32.4667	28.699	Promoter (<=1kb)	10	70042417	70092684	64081	23	ENSG00000108187	PBLD	phenazine biosynthesis like protein domain containing
chr10	70287107	70287352	246	43	3.07723	7.62382	4.32509	Promoter (<=1kb)	10	70242090	70287280	8034	0	ENSG00000122912	SLC25A16	solute carrier family 25 member 16
chr10	70480639	70480909	271	29	2.97187	6.14058	2.92302	Promoter (<=1kb)	10	70480971	70531202	55749	-62	ENSG00000060339	CCAR1	cell division cycle and apoptosis regulator 1
chr10	70660436	70660705	270	104	6.16609	13.926	10.4314	Promoter (<=1kb)	10	70661034	70674778	79009	-329	ENSG00000107625	DDX50	DExD-box helicase 50
chr10	71267600	71267911	312	294	7.22819	33.2333	29.4582	Distal Intergenic	10	71211226	71267423	23555	56374	ENSG00000099282	TSPAN15	tetraspanin 15
chr10	71993164	71993388	225	74	4.23215	10.8465	7.43116	Promoter (<=1kb)	10	71962586	71993190	5464	0	ENSG00000180817	PPA1	pyrophosphatase (inorganic) 1
chr10	73137146	73137376	231	47	3.03397	8.06407	4.74876	Distal Intergenic	10	73156691	73326693	64072	-19315	ENSG00000107736	CDH23	cadherin related 23
chr10	74114579	74114789	211	74	3.85503	10.8554	7.43931	Promoter (<=1kb)	10	74092588	74114907	54788	118	ENSG00000148719	DNAJB12	DnaJ heat shock protein family (Hsp40) member B12
chr10	74451728	74452054	327	80	4.73345	11.5129	8.07759	Promoter (<=1kb)	10	74451889	74631338	90550	0	ENSG00000156026	MCU	mitochondrial calcium uniporter
chr10	75173622	75173962	341	290	8.37891	32.8643	29.0931	Promoter (<=1kb)	10	75135189	75173841	310	0	ENSG00000138279	ANXA7	annexin A7
chr10	75255420	75255947	528	642	12.9987	68.3434	64.2917	Promoter (<=1kb)	10	75196563	75255782	5532	0	ENSG00000107758	PPP3CB	protein phosphatase 3 catalytic subunit beta
chr10	75385830	75386035	206	26	3.277	5.89698	2.69373	Distal Intergenic	10	75391370	75401515	58529	15480	ENSG00000177791	MYOZ1	myozenin 1
chr10	75503883	75504199	317	487	10.4491	52.7291	48.7873	Promoter (<=1kb)	10	75504131	75526611	9632	0	ENSG00000176986	SEC24C	SEC24 homolog C, COPII coat complex component
chr10	75531977	75532272	296	165	5.99806	20.1695	16.5598	Promoter (<=1kb)	10	75532049	75534881	170384	0	ENSG00000196968	FUT11	fucosyltransferase 11
chr10	75541679	75541971	293	173	4.93019	21.0134	17.3903	Promoter (<=1kb)	10	75541808	75543129	118487	0	ENSG00000172586	CHCHD1	coiled-coil-helix-coiled-coil-helix domain containing 1
chr10	75936075	75936612	538	2042	36.412	209.097	204.296	Promoter (<=1kb)	10	75936247	76469061	132	0	ENSG00000156110	ADK	adenosine kinase
chr10	76586251	76586674	424	916	13.6462	95.9033	91.6848	Promoter (<=1kb)	10	76586171	76792380	23522	80	ENSG00000156650	KAT6B	lysine acetyltransferase 6B
chr10	76970498	76971000	503	1123	18.7424	116.668	112.325	Promoter (<=1kb)	10	76970300	76991207	7417	198	ENSG00000165637	VDAC2	voltage dependent anion channel 2
chr10	79397297	79397543	247	80	4.73345	11.5129	8.07759	Promoter (<=1kb)	10	78629359	79397577	3778	34	ENSG00000156113	KCNMA1	potassium calcium-activated channel subfamily M alpha 1
chr10	79686209	79686677	469	228	7.10396	26.5746	22.875	Promoter (<=1kb)	10	79686570	79689583	100128292	0	NA	DLG5-AS1	DLG5 antisense RNA 1
chr10	80062780	80063254	475	1106	21.1259	114.987	110.655	Intron (uc010qlp.2/100132987, intron 1 of 3)	10	80027085	80159502	414243	35695	ENSG00000230417	LINC00595	long intergenic non-protein coding RNA 595
chr10	81205124	81205559	436	82	5.10412	11.6887	8.24902	Promoter (<=1kb)	10	81142083	81205383	219654	0	ENSG00000165424	ZCCHC24	zinc finger CCHC-type containing 24
chr10	82224952	82225191	240	42	3.00431	7.57307	4.27658	Intron (uc001kci.4/81619, intron 1 of 7)	10	82214038	82282391	81619	10914	ENSG00000108219	TSPAN14	tetraspanin 14
chr10	85898948	85899331	384	334	8.76659	37.2999	33.4849	Promoter (<=1kb)	10	85899185	85913311	27069	0	ENSG00000165678	GHITM	growth hormone inducible transmembrane protein
chr10	88281480	88281927	448	294	7.80201	33.199	29.4248	Promoter (<=1kb)	10	88195013	88281496	23063	0	ENSG00000062650	WAPL	WAPL cohesin release factor
chr10	89623259	89623581	323	310	8.87077	34.821	31.0307	Promoter (<=1kb)	10	89623195	89728532	5728	64	ENSG00000171862	PTEN	phosphatase and tensin homolog
chr10	89623910	89624165	256	57	3.61793	9.09627	5.73998	Promoter (<=1kb)	10	89623195	89728532	5728	715	ENSG00000171862	PTEN	phosphatase and tensin homolog
chr10	91404603	91404808	206	24	2.92576	5.64351	2.46768	Promoter (<=1kb)	10	91339254	91405329	53354	521	ENSG00000152782	PANK1	pantothenate kinase 1
chr10	91461143	91461534	392	576	16.8067	61.6062	57.6005	Promoter (<=1kb)	10	91461367	91534700	9585	0	ENSG00000138182	KIF20B	kinesin family member 20B
chr10	92631587	92631924	338	123	4.45668	15.8402	12.3056	Promoter (<=1kb)	10	92631474	92668312	10556	113	ENSG00000148688	RPP30	ribonuclease P/MRP subunit p30
chr10	93169592	93170111	520	730	14.6631	77.1643	73.0558	Promoter (<=1kb)	10	93170096	93222967	143279	0	ENSG00000165338	HECTD2	HECT domain E3 ubiquitin protein ligase 2
chr10	93557845	93558295	451	322	7.58959	36.023	32.2209	Promoter (<=1kb)	10	93558151	93625232	80351	0	ENSG00000107854	TNKS2	tankyrase 2
chr10	94607997	94608566	570	919	19.4092	96.193	91.9723	Promoter (<=1kb)	10	94608225	94661595	54536	0	ENSG00000138190	EXOC6	exocyst complex component 6
chr10	96162537	96162970	434	128	5.82578	16.4275	12.8827	Promoter (<=1kb)	10	96162186	96296089	23232	351	ENSG00000108239	TBC1D12	TBC1 domain family member 12
chr10	97416178	97416554	377	37	3.46854	7.01457	3.74827	Promoter (<=1kb)	10	97365686	97416567	5832	13	ENSG00000059573	ALDH18A1	aldehyde dehydrogenase 18 family member A1
chr10	97849897	97850163	267	144	4.77502	18.0005	14.4268	Promoter (<=1kb)	10	97512963	97849992	728558	0	ENSG00000226688	ENTPD1-AS1	ENTPD1 antisense RNA 1
chr10	97889655	97889876	222	88	3.80546	12.2733	8.81974	Promoter (<=1kb)	10	97889813	97923517	9849	0	ENSG00000177853	ZNF518A	zinc finger protein 518A
chr10	98592027	98592291	265	45	3.96106	7.90541	4.5964	Promoter (<=1kb)	10	98592017	98742626	84458	10	ENSG00000196233	LCOR	ligand dependent nuclear receptor corepressor
chr10	98592562	98593002	441	428	10.1269	46.7518	42.8559	Promoter (<=1kb)	10	98592712	98724198	84458	0	ENSG00000196233	LCOR	ligand dependent nuclear receptor corepressor
chr10	99052113	99052441	329	33	3.01174	6.63619	3.38603	Promoter (<=1kb)	10	98912799	99052430	100533184	0	ENSG00000269891	ARHGAP19-SLIT1	ARHGAP19-SLIT1 readthrough (NMD candidate)
chr10	99185897	99186234	338	235	7.68051	27.2451	23.5367	Promoter (<=1kb)	10	99186027	99193198	5223	0	ENSG00000171314	PGAM1	phosphoglycerate mutase 1
chr10	99257961	99258360	400	490	7.96884	53.0241	49.0802	Promoter (<=1kb)	10	99218081	99258149	64210	0	ENSG00000155229	MMS19	MMS19 homolog, cytosolic iron-sulfur assembly component
chr10	99393059	99393563	505	1518	19.8775	156.429	151.865	Promoter (<=1kb)	10	99374310	99393344	118812	0	ENSG00000171160	MORN4	MORN repeat containing 4
chr10	99894181	99894466	286	196	6.07295	23.3293	19.6722	Promoter (<=1kb)	10	99894381	100004654	27291	0	ENSG00000166024	R3HCC1L	R3H domain and coiled-coil containing 1 like
chr10	102046227	102046600	374	612	10.6066	65.2311	61.2004	Promoter (<=1kb)	10	102033035	102046469	282991	0	ENSG00000196072	BLOC1S2	biogenesis of lysosomal organelles complex 1 subunit 2
chr10	102289461	102289746	286	113	4.20604	14.8999	11.385	Promoter (<=1kb)	10	102265118	102289636	25956	0	ENSG00000075826	SEC31B	SEC31 homolog B, COPII coat complex component
chr10	102295574	102295876	303	100	4.33691	13.565	10.0785	Promoter (<=1kb)	10	102295641	102313681	55662	0	ENSG00000166135	HIF1AN	hypoxia inducible factor 1 alpha subunit inhibitor
chr10	103113319	103113606	288	95	5.90917	13.0047	9.53263	Promoter (<=1kb)	10	103113790	103239214	8945	-184	ENSG00000166167	BTRC	beta-transducin repeat containing E3 ubiquitin protein ligase
chr10	103113830	103114320	491	148	4.70676	18.4087	14.8272	Promoter (<=1kb)	10	103113790	103317078	8945	40	ENSG00000166167	BTRC	beta-transducin repeat containing E3 ubiquitin protein ligase
chr10	103347969	103348293	325	237	5.09162	27.4289	23.7193	Promoter (<=1kb)	10	103348089	103369410	25911	0	ENSG00000166171	DPCD	deleted in primary ciliary dyskinesia homolog (mouse)
chr10	103454302	103455052	751	165	6.2764	20.114	16.5051	Promoter (<=1kb)	10	103370421	103454743	6468	0	ENSG00000107829	FBXW4	F-box and WD repeat domain containing 4
chr10	103542907	103543339	433	620	14.2004	66.0833	62.0469	Promoter (<=1kb)	10	103541082	103543170	10360	0	ENSG00000107833	NPM3	nucleophosmin/nucleoplasmin 3
chr10	103825111	103825358	248	77	4.34956	11.1651	7.74074	Promoter (<=1kb)	10	103825124	103827795	79803	0	ENSG00000166189	HPS6	HPS6, biogenesis of lysosomal organelles complex 2 subunit 3
chr10	103874255	103874587	333	216	7.33915	25.3192	21.6353	Promoter (<=1kb)	10	103867325	103874723	8861	136	ENSG00000198728	LDB1	LIM domain binding 1
chr10	103892602	103893135	534	1641	20.0848	168.781	164.156	Promoter (<=1kb)	10	103892787	103910090	23082	0	ENSG00000148840	PPRC1	peroxisome proliferator-activated receptor gamma, coactivator-related 1
chr10	103911754	103912271	518	507	9.4782	54.666	50.7095	Promoter (<=1kb)	10	103911933	103923627	9221	0	ENSG00000166197	NOLC1	nucleolar and coiled-body phosphoprotein 1
chr10	104005328	104005647	320	351	8.26955	38.9517	35.1223	Promoter (<=1kb)	10	104005255	104142656	8729	73	ENSG00000107862	GBF1	golgi brefeldin A resistant guanine nucleotide exchange factor 1
chr10	104159002	104159299	298	124	4.77193	15.9675	12.4313	Exon (uc001kva.4/4791, exon 13 of 23)	10	104155432	104162286	4791	3570	ENSG00000077150	NFKB2	nuclear factor kappa B subunit 2
chr10	104192118	104192620	503	2833	26.0321	288.465	283.382	Promoter (<=1kb)	10	104183002	104192423	79004	0	ENSG00000107874	CUEDC2	CUE domain containing 2
chr10	104220789	104221303	515	4755	62.3043	481.023	475.502	Promoter (<=1kb)	10	104221170	104232006	79847	0	ENSG00000138111	MFSD13A	major facilitator superfamily domain containing 13A
chr10	104261718	104261988	271	96	3.68452	13.0837	9.60971	Promoter (<=1kb)	10	104238986	104262512	10121	524	ENSG00000138107	ACTR1A	ARP1 actin related protein 1 homolog A
chr10	104402711	104403405	695	87	5.03403	12.2325	8.78037	Promoter (<=1kb)	10	104404252	104418076	81603	-847	ENSG00000171206	TRIM8	tripartite motif containing 8
chr10	104503302	104503537	236	102	6.28265	13.7418	10.2518	Promoter (<=1kb)	10	104503727	104576021	54838	-190	ENSG00000166272	WBP1L	WW domain binding protein 1 like
chr10	104678005	104678814	810	6378	56.1389	643.652	637.83	Promoter (<=1kb)	10	104678075	104687375	54805	0	ENSG00000148842	CNNM2	cyclin and CBS domain divalent metal cation transport mediator 2
chr10	104952583	104952857	275	68	3.83351	10.2566	6.86108	Promoter (<=1kb)	10	104847774	104953063	22978	206	ENSG00000076685	NT5C2	5'-nucleotidase, cytosolic II
chr10	105127536	105128093	558	2263	37.9843	231.261	226.367	Promoter (<=1kb)	10	105127724	105148822	6877	0	ENSG00000148835	TAF5	TATA-box binding protein associated factor 5
chr10	106097882	106098113	232	39	3.13221	7.19373	3.91909	Promoter (<=1kb)	10	106069454	106098251	85450	138	ENSG00000148841	ITPRIP	inositol 1,4,5-trisphosphate receptor interacting protein
chr10	111682943	111683353	411	177	5.99083	21.3933	17.7647	Promoter (<=1kb)	10	111624524	111683311	7511	0	ENSG00000108039	XPNPEP1	X-prolyl aminopeptidase 1
chr10	112327085	112327689	605	1257	21.3452	130.127	125.705	Promoter (<=1kb)	10	112327449	112364392	9126	0	ENSG00000108055	SMC3	structural maintenance of chromosomes 3
chr10	112678339	112678545	207	30	3.17411	6.28341	3.05937	Promoter (<=1kb)	10	112658488	112678694	92482	149	ENSG00000214413	BBIP1	BBSome interacting protein 1
chr10	114711143	114711499	357	261	8.92274	29.9331	26.1933	Promoter (<=1kb)	10	114710882	114927436	6934	261	ENSG00000148737	TCF7L2	transcription factor 7 like 2
chr10	115614447	115614910	464	1124	21.1185	116.773	112.43	Promoter (<=1kb)	10	115614391	115672265	374354	56	ENSG00000196865	NHLRC2	NHL repeat containing 2
chr10	115933784	115934219	436	443	9.17679	48.2901	44.3831	Promoter (<=1kb)	10	115933864	115933938	100302224	0	ENSG00000284442	MIR2110	microRNA 2110
chr10	116697911	116698226	316	175	6.19707	21.1747	17.5495	Promoter (<=1kb)	10	116697915	116737439	142940	0	ENSG00000165832	TRUB1	TruB pseudouridine synthase family member 1
chr10	116852703	116853176	474	31	3.30337	6.39008	3.16234	Promoter (<=1kb)	10	116853124	116931125	26033	0	ENSG00000107518	ATRNL1	attractin like 1
chr10	118764371	118764852	482	81	4.51172	11.5976	8.15999	Promoter (<=1kb)	10	118615739	118765088	57698	236	ENSG00000187164	SHTN1	shootin 1
chr10	119134447	119134917	471	56	3.667	8.99086	5.63812	Promoter (<=1kb)	10	119042606	119134937	118987	20	ENSG00000165650	PDZD8	PDZ domain containing 8
chr10	119135346	119135653	308	218	7.22452	25.4864	21.8013	Promoter (<=1kb)	10	119042606	119134937	118987	-409	ENSG00000165650	PDZD8	PDZ domain containing 8
chr10	119806291	119806717	427	710	11.6221	75.1338	71.0381	Promoter (<=1kb)	10	119806332	119815736	255082	0	ENSG00000177640	CASC2	cancer susceptibility 2 (non-protein coding)
chr10	120101535	120101982	448	644	12.3996	68.4866	64.4337	Promoter (<=1kb)	10	120068572	120101839	63877	0	ENSG00000165669	FAM204A	family with sequence similarity 204 member A
chr10	120839617	120839946	330	117	4.78083	15.3227	11.7991	Promoter (<=1kb)	10	120794541	120840031	8661	85	ENSG00000107581	EIF3A	eukaryotic translation initiation factor 3 subunit A
chr10	120863496	120863856	361	204	5.62391	24.1635	20.4948	Promoter (<=1kb)	10	120863611	120897376	55855	0	NA	FAM45BP	family with sequence similarity 45, member A pseudogene
chr10	120938127	120938490	364	606	10.9627	64.6989	60.672	Promoter (<=1kb)	10	120927215	120938345	10935	0	ENSG00000165672	PRDX3	peroxiredoxin 3
chr10	121355618	121356437	820	1805	21.4388	185.226	180.526	Promoter (<=1kb)	10	121332978	121356541	7073	104	ENSG00000151923	TIAL1	TIA1 cytotoxic granule associated RNA binding protein like 1
chr10	121632118	121632747	630	5838	66.0674	589.527	583.813	Promoter (<=1kb)	10	121588916	121632395	79892	0	ENSG00000197771	MCMBP	minichromosome maintenance complex binding protein
chr10	121651918	121652337	420	464	8.70115	50.3964	46.4719	Promoter (<=1kb)	10	121652085	121704170	11196	0	ENSG00000107651	SEC23IP	SEC23 interacting protein
chr10	123686980	123688117	1138	4673	50.7232	472.844	467.338	Promoter (<=1kb)	10	123502625	123687546	11101	0	ENSG00000107669	ATE1	arginyltransferase 1
chr10	123734254	123734588	335	228	7.80128	26.5563	22.8574	Promoter (<=1kb)	10	123719534	123734273	54780	0	ENSG00000107672	NSMCE4A	NSE4 homolog A, SMC5-SMC6 complex component
chr10	124768034	124768489	456	449	8.47185	48.8986	44.9861	Promoter (<=1kb)	10	124768429	124817806	36	0	ENSG00000196177	ACADSB	acyl-CoA dehydrogenase short/branched chain
chr10	126150278	126150629	352	328	8.54888	36.6272	32.8188	Promoter (<=1kb)	10	126150341	126302710	64077	0	ENSG00000107902	LHPP	phospholysine phosphohistidine inorganic pyrophosphate phosphatase
chr10	126480341	126480598	258	96	4.03224	13.1024	9.62724	Promoter (<=1kb)	10	126447406	126480439	399818	0	ENSG00000203791	EEF1AKMT2	EEF1A lysine methyltransferase 2
chr10	126490224	126490724	501	694	9.48328	73.5115	69.4259	Promoter (<=1kb)	10	126490354	126525239	23172	0	ENSG00000165660	ABRAXAS2	abraxas 2, BRISC complex subunit
chr10	126605184	126606040	857	466	10.1705	50.5654	46.6396	Distal Intergenic	10	126628972	126676005	54764	-22932	ENSG00000019995	ZRANB1	zinc finger RANBP2-type containing 1
chr10	127512024	127512254	231	96	4.03224	13.1024	9.62724	Promoter (<=1kb)	10	127512104	127523219	56647	0	ENSG00000107949	BCCIP	BRCA2 and CDKN1A interacting protein
chr10	127578243	127578596	354	89	6.68417	12.3857	8.92713	Intron (uc001ljg.1/55760, intron 1 of 11)	10	127524909	127585027	55760	6431	ENSG00000089876	DHX32	DEAH-box helicase 32 (putative)
chr10	127593857	127594099	243	77	6.21492	11.1914	7.76649	Intron (uc010quk.1/92565, intron 1 of 3)	10	127585108	127698161	92565	8749	ENSG00000203780	FANK1	fibronectin type III and ankyrin repeat domains 1
chr10	127779717	127779948	232	33	4.45611	6.61197	3.36306	Intron (uc001ljk.2/8038, intron 11 of 22)	10	127668730	127698078	92565	110987	ENSG00000203780	FANK1	fibronectin type III and ankyrin repeat domains 1
chr10	128593858	128594291	434	573	12.5684	61.3977	57.3938	Promoter (<=1kb)	10	128594023	129250780	1793	0	ENSG00000150760	DOCK1	dedicator of cytokinesis 1
chr10	131265314	131265560	247	66	3.9262	9.99286	6.60499	Promoter (<=1kb)	10	131265454	131565783	4255	0	ENSG00000170430	MGMT	O-6-methylguanine-DNA methyltransferase
chr10	131934497	131934906	410	571	12.718	61.1452	57.1427	Promoter (<=1kb)	10	131934639	131977932	10539	0	ENSG00000108010	GLRX3	glutaredoxin 3
chr10	134145569	134145932	364	373	10.3412	41.2335	37.3842	Promoter (<=1kb)	10	134145614	134166901	80313	0	ENSG00000148814	LRRC27	leucine rich repeat containing 27
chr10	134351152	134351402	251	110	4.98789	14.5686	11.0597	Promoter (<=1kb)	10	134351353	134591381	3632	0	ENSG00000068383	INPP5A	inositol polyphosphate-5-phosphatase A
chr10	134901210	134901475	266	95	4.68559	13.0385	9.56549	Promoter (<=1kb)	10	134901409	134945179	84435	0	ENSG00000197177	ADGRA1	adhesion G protein-coupled receptor A1
chr10	135186656	135186997	342	322	7.88192	36.0372	32.2347	Promoter (<=1kb)	10	135175987	135186908	1892	0	ENSG00000127884	ECHS1	enoyl-CoA hydratase, short chain 1
chr10	135207581	135207959	379	134	5.44133	16.959	13.4032	Promoter (<=1kb)	10	135207621	135234174	92170	0	ENSG00000148824	MTG1	mitochondrial ribosome associated GTPase 1
chr10	135500249	135501190	942	772	8.43055	81.3377	77.2041	Distal Intergenic	10	135493786	135498458	653548	6463	NA	DUX4L3	double homeobox 4 like 3
chr11	207213	207538	326	223	6.11285	26.0008	22.308	Promoter (<=1kb)	11	202924	207422	51272	0	ENSG00000177951	BET1L	Bet1 golgi vesicular membrane trafficking protein like
chr11	236073	236468	396	354	10.2939	39.2624	35.4302	Promoter (<=1kb)	11	215030	236362	23410	0	ENSG00000142082	SIRT3	sirtuin 3
chr11	694663	695168	506	350	7.951	38.874	35.0455	Promoter (<=1kb)	11	695591	704131	283232	-423	ENSG00000177042	TMEM80	transmembrane protein 80
chr11	695584	696106	523	1605	18.8263	165.145	160.538	Promoter (<=1kb)	11	644225	695740	10522	0	ENSG00000177030	DEAF1	DEAF1, transcription factor
chr11	734858	735454	597	88	3.39286	12.283	8.829	Distal Intergenic	11	724562	727727	64787	10296	ENSG00000177106	EPS8L2	EPS8 like 2
chr11	735885	736324	440	41	2.69081	7.43593	4.15304	Distal Intergenic	11	747432	760965	6888	-11108	ENSG00000177156	TALDO1	transaldolase 1
chr11	777269	777629	361	374	7.40524	41.2753	37.4258	Promoter (<=1kb)	11	767223	777487	347862	0	ENSG00000177225	GATD1	glutamine amidotransferase like class 1 domain containing 1
chr11	809444	809777	334	180	5.83655	21.7211	18.0883	Promoter (<=1kb)	11	809936	812876	6181	-159	ENSG00000177600	RPLP2	ribosomal protein lateral stalk subunit P2
chr11	833317	833587	271	88	3.67649	12.2935	8.83874	Promoter (<=1kb)	11	832952	838835	977	365	ENSG00000177697	CD151	CD151 molecule (Raph blood group)
chr11	842275	842660	386	273	6.41477	31.0548	27.3028	Promoter (<=1kb)	11	839721	842529	5441	0	ENSG00000177700	POLR2L	RNA polymerase II subunit L
chr11	1330809	1331173	365	223	6.92754	26.0427	22.3496	Promoter (<=1kb)	11	1330938	1331937	255512	0	ENSG00000255153	TOLLIP-AS1	TOLLIP antisense RNA 1 (head to head)
chr11	1410603	1410845	243	43	3.07723	7.62382	4.32509	Promoter (<=1kb)	11	1411129	1478279	9024	-284	ENSG00000174672	BRSK2	BR serine/threonine kinase 2
chr11	1968467	1968834	368	497	9.84431	53.6796	49.7306	Promoter (<=1kb)	11	1968502	1977839	6150	0	ENSG00000214026	MRPL23	mitochondrial ribosomal protein L23
chr11	2421856	2422232	377	223	5.68645	25.9962	22.3036	Promoter (<=1kb)	11	2421718	2425106	10078	138	ENSG00000184281	TSSC4	tumor suppressing subtransferable candidate 4
chr11	3013198	3013696	499	519	8.58435	55.9635	51.9977	Promoter (<=1kb)	11	2965660	3013607	4676	0	ENSG00000205531	NAP1L4	nucleosome assembly protein 1 like 4
chr11	3078565	3078925	361	169	4.45533	20.5474	16.9322	Promoter (<=1kb)	11	3022152	3078681	833	0	ENSG00000110619	CARS	cysteinyl-tRNA synthetase
chr11	3399968	3400245	278	120	4.02726	15.6137	12.0832	Promoter (<=1kb)	11	3379157	3400452	7748	207	ENSG00000005801	ZNF195	zinc finger protein 195
chr11	3675423	3675990	568	392	6.28519	43.1186	39.2531	Intron (uc009yeb.1/417, intron 1 of 3)	11	3666361	3685646	417	9062	ENSG00000129744	ART1	ADP-ribosyltransferase 1
chr11	4115671	4116179	509	2330	23.6339	237.947	233.027	Promoter (<=1kb)	11	4115924	4139691	6240	0	ENSG00000167325	RRM1	ribonucleotide reductase catalytic subunit M1
chr11	6255701	6256069	369	474	8.68059	51.4199	47.4876	Promoter (<=1kb)	11	6255995	6265709	1262	0	ENSG00000132259	CNGA4	cyclic nucleotide gated channel alpha 4
chr11	6440180	6440750	571	328	6.57133	36.6336	32.8251	Promoter (<=1kb)	11	6416355	6440332	322	0	ENSG00000166313	APBB1	amyloid beta precursor protein binding family B member 1
chr11	8008725	8009180	456	733	15.8389	77.4831	73.3729	Promoter (<=1kb)	11	8008445	8017719	8665	280	ENSG00000175390	EIF3F	eukaryotic translation initiation factor 3 subunit F
chr11	9482035	9482549	515	738	10.111	77.9384	73.8255	Promoter (<=1kb)	11	9481103	9482245	644656	0	ENSG00000268403	LOC644656	uncharacterized LOC644656
chr11	10315284	10315922	639	647	14.3933	68.8538	64.7986	Promoter (<=1kb)	11	9800214	10315754	81846	0	ENSG00000133812	SBF2	SET binding factor 2
chr11	10512608	10512832	225	76	5.13347	11.0457	7.62573	Intron (uc010rbz.1/272, intron 5 of 13)	11	10529434	10530723	100463486	17891	ENSG00000255823	MTRNR2L8	MT-RNR2 like 8
chr11	10829574	10830617	1044	3052	34.1119	310.422	305.276	Promoter (<=1kb)	11	10818593	10830043	1982	0	ENSG00000110321	EIF4G2	eukaryotic translation initiation factor 4 gamma 2
chr11	10879036	10879562	527	2151	23.2384	219.969	215.122	Promoter (<=1kb)	11	10874251	10879366	58486	0	ENSG00000236287	ZBED5	zinc finger BED-type containing 5
chr11	11863302	11863793	492	946	11.4453	98.9067	94.6705	Promoter (<=1kb)	11	11862970	11980872	55031	332	ENSG00000170242	USP47	ubiquitin specific peptidase 47
chr11	13689548	13689965	418	174	5.54161	21.1231	17.4986	Promoter (<=1kb)	11	13690206	13734631	84188	-241	ENSG00000197601	FAR1	fatty acyl-CoA reductase 1
chr11	14380233	14380905	673	248	6.00862	28.5406	24.8165	Promoter (<=1kb)	11	14299466	14380729	22800	0	ENSG00000133818	RRAS2	RAS related 2
chr11	14402799	14403106	308	174	5.54161	21.1231	17.4986	Distal Intergenic	11	14299466	14386052	22800	-16747	ENSG00000133818	RRAS2	RAS related 2
chr11	16759875	16760363	489	75	3.16163	10.9979	7.57886	Promoter (<=1kb)	11	16760148	16779901	10944	0	ENSG00000110696	C11orf58	chromosome 11 open reading frame 58
chr11	17035675	17036118	444	77	3.7139	11.1648	7.74052	Promoter (<=1kb)	11	16800548	17035963	144100	0	ENSG00000166689	PLEKHA7	pleckstrin homology domain containing A7
chr11	17098989	17099330	342	140	4.28432	17.6067	14.0401	Promoter (<=1kb)	11	17095939	17099220	6207	0	ENSG00000110700	RPS13	ribosomal protein S13
chr11	17756660	17757100	441	39	3.13688	7.20776	3.93265	Promoter (<=1kb)	11	17757495	17799377	3746	-395	ENSG00000129159	KCNC1	potassium voltage-gated channel subfamily C member 1
chr11	18343823	18344268	446	701	14.449	74.2595	70.1699	Promoter (<=1kb)	11	18343816	18388590	2965	7	ENSG00000110768	GTF2H1	general transcription factor IIH subunit 1
chr11	18548211	18548484	274	177	5.99083	21.3933	17.7647	Promoter (<=1kb)	11	18501858	18548503	7251	19	ENSG00000074319	TSG101	tumor susceptibility 101
chr11	22454085	22454357	273	43	4.11935	7.68948	4.38766	Distal Intergenic	11	22359667	22401046	57084	94418	ENSG00000091664	SLC17A6	solute carrier family 17 member 6
chr11	27528089	27528558	470	398	8.55335	43.7545	39.8833	Promoter (<=1kb)	11	27528399	27699350	497258	0	ENSG00000245573	BDNF-AS	BDNF antisense RNA
chr11	31531204	31531612	409	276	8.25842	31.4493	27.6923	Promoter (<=1kb)	11	31531297	31805329	26610	0	ENSG00000109911	ELP4	elongator acetyltransferase complex subunit 4
chr11	32008834	32009175	342	62	4.46137	9.59781	6.22117	Intron (uc021qfp.1/5954, intron 1 of 5)	11	32112477	32127272	5954	-103302	ENSG00000049449	RCN1	reticulocalbin 1
chr11	32914235	32914584	350	188	5.94374	22.4843	18.8404	Promoter (<=1kb)	11	32914792	33001814	79832	-208	ENSG00000060749	QSER1	glutamine and serine rich 1
chr11	33037474	33037698	225	35	2.74423	6.82757	3.56995	Promoter (<=1kb)	11	33037728	33055128	91614	-30	ENSG00000121690	DEPDC7	DEP domain containing 7
chr11	33060595	33061396	802	8556	46.6209	861.783	855.674	Promoter (<=1kb)	11	33060963	33095109	55346	0	ENSG00000176148	TCP11L1	t-complex 11 like 1
chr11	33182887	33183257	371	378	6.0505	41.7461	37.8928	Promoter (<=1kb)	11	33106130	33183037	1479	0	ENSG00000176102	CSTF3	cleavage stimulation factor subunit 3
chr11	33278948	33280137	1190	742	9.61413	78.3502	74.234	Promoter (<=1kb)	11	33279877	33378568	10114	0	ENSG00000110422	HIPK3	homeodomain interacting protein kinase 3
chr11	33795593	33796264	672	2040	20.2752	208.84	204.04	Promoter (<=1kb)	11	33762490	33795893	26273	0	ENSG00000110429	FBXO3	F-box protein 3
chr11	34074934	34075207	274	147	5.94606	18.3699	14.7895	Promoter (<=1kb)	11	34074528	34124157	4076	406	ENSG00000135387	CAPRIN1	cell cycle associated protein 1
chr11	34937951	34938469	519	1332	18.1909	137.716	133.25	Promoter (<=1kb)	11	34903843	34937939	51074	-12	ENSG00000149089	APIP	APAF1 interacting protein
chr11	36310793	36311190	398	715	12.6628	75.6667	71.5674	Promoter (<=1kb)	11	36293842	36310999	29099	0	ENSG00000110442	COMMD9	COMM domain containing 9
chr11	43380219	43380783	565	3376	27.591	342.884	337.654	Promoter (<=1kb)	11	43380435	43468067	55761	0	ENSG00000052841	TTC17	tetratricopeptide repeat domain 17
chr11	43665589	43665964	376	655	10.3148	69.6434	65.5831	Distal Intergenic	11	43702143	43777080	51144	-36179	ENSG00000149084	HSD17B12	hydroxysteroid 17-beta dehydrogenase 12
chr11	43702052	43702268	217	68	3.51357	10.2118	6.81724	Promoter (<=1kb)	11	43702143	43777080	51144	0	ENSG00000149084	HSD17B12	hydroxysteroid 17-beta dehydrogenase 12
chr11	45168077	45168868	792	28	2.82089	6.06274	2.84981	Promoter (<=1kb)	11	45168894	45246639	56981	-26	ENSG00000019485	PRDM11	PR/SET domain 11
chr11	45868774	45869282	509	1191	13.4738	123.538	119.156	Promoter (<=1kb)	11	45868957	45904799	1408	0	ENSG00000121671	CRY2	cryptochrome circadian regulator 2
chr11	46260664	46260903	240	28	2.65472	6.02368	2.81634	Distal Intergenic	11	46299228	46342296	90993	-38325	ENSG00000157613	CREB3L1	cAMP responsive element binding protein 3 like 1
chr11	46999082	46999331	250	42	4.82745	7.50176	4.20799	Intron (uc001ndp.4/79096, intron 1 of 8)	11	46958240	47185931	79096	40842	ENSG00000149179	C11orf49	chromosome 11 open reading frame 49
chr11	47198036	47198610	575	797	10.5449	83.8708	79.7219	Promoter (<=1kb)	11	47185849	47198676	84364	66	ENSG00000149182	ARFGAP2	ADP ribosylation factor GTPase activating protein 2
chr11	47236276	47236527	252	145	4.47515	18.1172	14.5406	Promoter (<=1kb)	11	47236493	47260769	1643	0	ENSG00000134574	DDB2	damage specific DNA binding protein 2
chr11	47270169	47270718	550	2693	21.4897	274.383	269.345	Promoter (<=1kb)	11	47270449	47290584	10062	0	ENSG00000025434	NR1H3	nuclear receptor subfamily 1 group H member 3
chr11	47447555	47448107	553	584	8.16157	62.4618	58.4507	Promoter (<=1kb)	11	47440320	47448024	5702	0	ENSG00000165916	PSMC3	proteasome 26S subunit, ATPase 3
chr11	47574316	47574920	605	2196	25.2351	224.532	219.665	Promoter (<=1kb)	11	47487489	47574792	10658	0	ENSG00000149187	CELF1	CUGBP Elav-like family member 1
chr11	47586993	47587423	431	427	7.19421	46.6474	42.7525	Promoter (<=1kb)	11	47586982	47606115	4722	11	ENSG00000213619	NDUFS3	NADH:ubiquinone oxidoreductase core subunit S3
chr11	47600504	47600887	384	539	7.45935	57.9173	53.9371	Promoter (<=1kb)	11	47600562	47603400	4722	0	ENSG00000213619	NDUFS3	NADH:ubiquinone oxidoreductase core subunit S3
chr11	47663819	47664273	455	729	13.4612	77.024	72.9163	Promoter (<=1kb)	11	47638858	47664206	23788	0	ENSG00000109919	MTCH2	mitochondrial carrier 2
chr11	47869657	47870145	489	1125	12.7534	116.847	112.504	Promoter (<=1kb)	11	47799670	47870057	23279	0	ENSG00000030066	NUP160	nucleoporin 160
chr11	48817834	48818053	220	184	4.45503	22.1166	18.4776	Distal Intergenic	11	49053152	49059529	283116	-235099	ENSG00000182053	TRIM49B	tripartite motif containing 49B
chr11	48882593	48882812	220	155	8.14773	19.1677	15.5739	Distal Intergenic	11	49053152	49059529	283116	-170340	ENSG00000182053	TRIM49B	tripartite motif containing 49B
chr11	50725060	50725324	265	147	5.94606	18.3699	14.7895	Distal Intergenic	11	50375235	50379802	646813	349825	NA	LOC646813	DExH-box helicase 9 pseudogene
chr11	50758234	50758463	230	50	5.1988	8.42311	5.09023	Distal Intergenic	11	50375235	50379802	646813	382999	NA	LOC646813	DExH-box helicase 9 pseudogene
chr11	51569682	51570223	542	162	3.40574	19.8674	16.2635	Distal Intergenic	11	51515282	51516211	119749	54400	ENSG00000185926	OR4C46	olfactory receptor family 4 subfamily C member 46
chr11	51572528	51572734	207	165	4.49638	20.1097	16.5011	Distal Intergenic	11	51515282	51516211	119749	57246	ENSG00000185926	OR4C46	olfactory receptor family 4 subfamily C member 46
chr11	51579460	51579674	215	3342	2.39909	339.46	334.239	Distal Intergenic	11	51515282	51516211	119749	64178	ENSG00000185926	OR4C46	olfactory receptor family 4 subfamily C member 46
chr11	51582598	51583078	481	1421	1.99856	146.664	142.15	Distal Intergenic	11	51515282	51516211	119749	67316	ENSG00000185926	OR4C46	olfactory receptor family 4 subfamily C member 46
chr11	51586774	51587045	272	4060	2.77397	411.466	406.079	Distal Intergenic	11	51515282	51516211	119749	71492	ENSG00000185926	OR4C46	olfactory receptor family 4 subfamily C member 46
chr11	51588258	51588484	227	1950	3.40887	199.82	195.06	Distal Intergenic	11	51515282	51516211	119749	72976	ENSG00000185926	OR4C46	olfactory receptor family 4 subfamily C member 46
chr11	51588818	51589098	281	4728	2.97236	478.392	472.875	Distal Intergenic	11	51515282	51516211	119749	73536	ENSG00000185926	OR4C46	olfactory receptor family 4 subfamily C member 46
chr11	51590365	51590613	249	4283	2.54833	433.737	428.306	Distal Intergenic	11	51515282	51516211	119749	75083	ENSG00000185926	OR4C46	olfactory receptor family 4 subfamily C member 46
chr11	51591005	51591248	244	2309	2.39662	235.828	230.917	Distal Intergenic	11	51515282	51516211	119749	75723	ENSG00000185926	OR4C46	olfactory receptor family 4 subfamily C member 46
chr11	55012306	55012688	383	51	4.34821	8.44516	5.11121	Distal Intergenic	11	55029658	55038595	79097	-16970	ENSG00000150244	TRIM48	tripartite motif containing 48
chr11	57092475	57092852	378	308	6.04968	34.5933	30.8046	Promoter (<=1kb)	11	57075869	57092413	85456	-62	ENSG00000149115	TNKS1BP1	tankyrase 1 binding protein 1
chr11	57405734	57406108	375	585	10.7378	62.5717	58.5591	Promoter (2-3kb)	11	57408671	57408759	406919	-2563	ENSG00000208009	MIR130A	microRNA 130a
chr11	57479966	57480258	293	118	4.51343	15.4121	11.8862	Promoter (<=1kb)	11	57479995	57586652	100528016	0	NA	TMX2-CTNND1	TMX2-CTNND1 readthrough (NMD candidate)
chr11	57508878	57509203	326	241	5.48393	27.8562	24.1395	Promoter (<=1kb)	11	57508722	57510883	280636	156	ENSG00000211450	SELENOH	selenoprotein H
chr11	59382904	59383287	384	218	5.22687	25.5387	21.8526	Promoter (<=1kb)	11	59341871	59383617	5007	330	ENSG00000110048	OSBP	oxysterol binding protein
chr11	60609290	60609689	400	1155	14.7211	119.941	115.58	Promoter (<=1kb)	11	60609429	60618561	79080	0	ENSG00000110104	CCDC86	coiled-coil domain containing 86
chr11	61129471	61129930	460	1262	14.583	130.69	126.265	Promoter (<=1kb)	11	61116220	61129755	220002	0	ENSG00000162144	CYB561A3	cytochrome b561 family member A3
chr11	61197179	61197751	573	680	8.91034	72.1345	68.0577	Promoter (<=1kb)	11	61197597	61214239	54949	0	ENSG00000167985	SDHAF2	succinate dehydrogenase complex assembly factor 2
chr11	61584340	61584567	228	15	2.52987	4.57733	1.50107	Promoter (<=1kb)	11	61567097	61584529	3992	0	ENSG00000149485	FADS1	fatty acid desaturase 1
chr11	61596242	61596639	398	686	11.04	72.7523	68.6719	Promoter (<=1kb)	11	61595713	61634825	9415	529	ENSG00000134824	FADS2	fatty acid desaturase 2
chr11	61734588	61735065	478	172	5.37066	20.9024	17.2814	Promoter (<=1kb)	11	61731757	61735132	2495	67	ENSG00000167996	FTH1	ferritin heavy chain 1
chr11	61735701	61736000	300	89	3.1553	12.4071	8.94826	Promoter (<=1kb)	11	61731757	61735132	2495	-569	ENSG00000167996	FTH1	ferritin heavy chain 1
chr11	62368708	62369045	338	91	3.69075	12.6033	9.13992	Promoter (<=1kb)	11	62360675	62368747	9219	0	ENSG00000149480	MTA2	metastasis associated 1 family member 2
chr11	62389274	62389556	283	189	5.41169	22.5711	18.9253	Promoter (<=1kb)	11	62382768	62389449	26229	0	ENSG00000149541	B3GAT3	beta-1,3-glucuronyltransferase 3
chr11	62413748	62414296	549	1180	14.9214	122.377	118.002	Promoter (<=1kb)	11	62392298	62414198	23193	0	ENSG00000089597	GANAB	glucosidase II alpha subunit
chr11	62439062	62439329	268	125	4.62392	16.1234	12.5838	Promoter (<=1kb)	11	62430289	62439241	79081	0	ENSG00000162194	LBHD1	LBH domain containing 1
chr11	62476894	62477387	494	1352	12.0644	139.709	135.232	Promoter (<=1kb)	11	62457734	62477091	26580	0	ENSG00000168000	BSCL2	BSCL2, seipin lipid droplet biogenesis associated
chr11	62554680	62555070	391	251	6.43164	28.9125	25.1838	Promoter (<=1kb)	11	62554874	62557872	374395	0	ENSG00000185475	TMEM179B	transmembrane protein 179B
chr11	62559216	62559637	422	638	10.334	67.8635	63.8151	Promoter (<=1kb)	11	62557787	62559486	79064	0	ENSG00000168569	TMEM223	transmembrane protein 223
chr11	62572624	62573052	429	163	6.5313	19.9168	16.3112	Promoter (<=1kb)	11	62559598	62572964	10482	0	ENSG00000162231	NXF1	nuclear RNA export factor 1
chr11	62606700	62607221	522	1028	11.7246	107.096	102.812	Promoter (<=1kb)	11	62600383	62607131	54663	0	ENSG00000133316	WDR74	WD repeat domain 74
chr11	62648407	62648778	372	131	4.29249	16.737	13.1852	Promoter (<=1kb)	11	62648344	62656355	6520	63	ENSG00000168003	SLC3A2	solute carrier family 3 member 2
chr11	63580886	63581315	430	27	3.10682	5.9118	2.70804	Promoter (<=1kb)	11	63580923	63595190	144097	0	ENSG00000168005	SPINDOC	spindlin interactor and repressor of chromatin binding
chr11	63606171	63607012	842	1901	20.5295	194.84	190.1	Promoter (<=1kb)	11	63606400	63678492	2011	0	ENSG00000072518	MARK2	microtubule affinity regulating kinase 2
chr11	63741974	63742390	417	547	8.48296	58.7651	54.7795	Promoter (<=1kb)	11	63742079	63744015	1351	0	ENSG00000176340	COX8A	cytochrome c oxidase subunit 8A
chr11	63753720	63754322	603	1357	14.3884	140.265	135.785	Promoter (<=1kb)	11	63753833	63765892	55611	0	ENSG00000167770	OTUB1	OTU deubiquitinase, ubiquitin aldehyde binding 1
chr11	63997784	63998143	360	100	4.00575	13.5654	10.0785	Promoter (<=1kb)	11	63997904	64001753	3338	0	ENSG00000110011	DNAJC4	DnaJ heat shock protein family (Hsp40) member C4
chr11	64008964	64009291	328	181	4.79844	21.8181	18.1835	Promoter (<=1kb)	11	64009588	64011607	2286	-297	ENSG00000173486	FKBP2	FK506 binding protein 2
chr11	64013952	64014306	355	564	9.74021	60.4723	56.4747	Promoter (<=1kb)	11	64011951	64014413	26472	107	ENSG00000173457	PPP1R14B	protein phosphatase 1 regulatory inhibitor subunit 14B
chr11	64014747	64015277	531	2290	24.2446	233.984	229.079	Promoter (<=1kb)	11	64011951	64014413	26472	-334	ENSG00000173457	PPP1R14B	protein phosphatase 1 regulatory inhibitor subunit 14B
chr11	64037398	64037860	463	788	9.81177	83.0311	78.8867	3' UTR	11	64051811	64056972	56834	-13951	ENSG00000173264	GPR137	G protein-coupled receptor 137
chr11	64052663	64053224	562	4117	39.2145	417.193	411.796	Promoter (<=1kb)	11	64053582	64055485	56834	-358	ENSG00000173264	GPR137	G protein-coupled receptor 137
chr11	64126481	64126782	302	124	4.26651	16.0292	12.4919	Promoter (<=1kb)	11	64126625	64139687	8986	0	ENSG00000162302	RPS6KA4	ribosomal protein S6 kinase A4
chr11	64510294	64510502	209	43	3.21712	7.65871	4.35849	Promoter (1-2kb)	11	64494383	64511630	10235	1128	ENSG00000068831	RASGRP2	RAS guanyl releasing protein 2
chr11	64545636	64546288	653	311	6.3913	34.9205	31.1291	Promoter (<=1kb)	11	64532076	64545938	7536	0	ENSG00000168066	SF1	splicing factor 1
chr11	64808487	64808851	365	82	4.11953	11.6861	8.24672	Promoter (<=1kb)	11	64808376	64812300	29901	111	ENSG00000168061	SAC3D1	SAC3 domain containing 1
chr11	64851281	64851624	344	86	3.69765	12.1232	8.67297	Promoter (<=1kb)	11	64844927	64851615	113130	0	ENSG00000146670	CDCA5	cell division cycle associated 5
chr11	64863630	64863871	242	110	3.97648	14.5627	11.0545	Promoter (<=1kb)	11	64863587	64879332	738	43	ENSG00000149823	VPS51	VPS51, GARP complex subunit
chr11	64889571	64889959	389	387	7.85225	42.6379	38.777	Promoter (<=1kb)	11	64888099	64889672	2197	0	ENSG00000149806	FAU	FAU, ubiquitin like and ribosomal protein S30 fusion
chr11	65082387	65082774	388	177	5.10733	21.38	17.7521	Promoter (<=1kb)	11	65082289	65089900	10435	98	ENSG00000149798	CDC42EP2	CDC42 effector protein 2
chr11	65101166	65101554	389	538	8.86601	57.8171	53.838	Promoter (<=1kb)	11	65101225	65120451	5977	0	ENSG00000133884	DPF2	double PHD fingers 2
chr11	65149667	65149955	289	207	4.9869	24.419	20.7472	Promoter (<=1kb)	11	65142663	65149857	283130	0	ENSG00000162241	SLC25A45	solute carrier family 25 member 45
chr11	65264919	65265475	557	392	5.93939	43.1519	39.2862	Promoter (<=1kb)	11	65265233	65273939	378938	0	ENSG00000251562	MALAT1	metastasis associated lung adenocarcinoma transcript 1 (non-protein coding)
chr11	65265770	65266099	330	50	3.37315	8.35602	5.03035	Promoter (<=1kb)	11	65265233	65273939	378938	537	ENSG00000251562	MALAT1	metastasis associated lung adenocarcinoma transcript 1 (non-protein coding)
chr11	65337842	65338059	218	85	3.19147	11.9724	8.52631	Promoter (<=1kb)	11	65337943	65339239	10534	0	ENSG00000173465	SSSCA1	Sjogren syndrome/scleroderma autoantigen 1
chr11	65430151	65430670	520	58	4.15533	9.19059	5.83188	Promoter (<=1kb)	11	65421067	65430443	5970	0	ENSG00000173039	RELA	RELA proto-oncogene, NF-kB subunit
chr11	65479613	65479880	268	219	4.8143	25.633	21.9453	Promoter (<=1kb)	11	65479473	65487077	10524	140	ENSG00000172977	KAT5	lysine acetyltransferase 5
chr11	65487980	65488309	330	74	3.48981	10.8358	7.42162	Promoter (<=1kb)	11	65485144	65487971	84153	-9	ENSG00000172922	RNASEH2C	ribonuclease H2 subunit C
chr11	65655756	65656011	256	116	4.35057	15.14	11.6199	Promoter (<=1kb)	11	65651211	65656010	9158	0	ENSG00000172500	FIBP	FGF1 intracellular binding protein
chr11	65658174	65658442	269	35	2.93032	6.76291	3.50819	Promoter (<=1kb)	11	65657875	65659106	11007	299	ENSG00000175602	CCDC85B	coiled-coil domain containing 85B
chr11	65686095	65686758	664	1620	20.0056	166.679	162.064	Promoter (<=1kb)	11	65686728	65689048	10589	0	ENSG00000175550	DRAP1	DR1 associated protein 1
chr11	65819622	65820186	565	1079	12.4264	112.293	107.977	Promoter (<=1kb)	11	65819816	65821319	10992	0	ENSG00000087365	SF3B2	splicing factor 3b subunit 2
chr11	65837899	65838240	342	51	3.58756	8.51788	5.18114	Promoter (<=1kb)	11	65837824	66012218	55690	75	ENSG00000175115	PACS1	phosphofurin acidic cluster sorting protein 1
chr11	66035842	66036306	465	1323	13.7568	136.778	132.318	Promoter (<=1kb)	11	66036056	66044963	81876	0	ENSG00000174903	RAB1B	RAB1B, member RAS oncogene family
chr11	66056357	66056705	349	127	4.11295	16.2692	12.7269	Promoter (<=1kb)	11	66052051	66056638	10897	0	ENSG00000174851	YIF1A	Yip1 interacting factor homolog A, membrane trafficking protein
chr11	66138873	66139116	244	69	3.62705	10.3617	6.96086	Promoter (<=1kb)	11	66129992	66139117	3177	1	ENSG00000174669	SLC29A2	solute carrier family 29 member 2
chr11	66206062	66206383	322	309	6.54199	34.7045	30.9149	Promoter (<=1kb)	11	66202550	66206310	65003	0	ENSG00000174547	MRPL11	mitochondrial ribosomal protein L11
chr11	66277959	66278359	401	905	14.095	94.7272	90.5147	Promoter (<=1kb)	11	66278119	66291047	582	0	ENSG00000174483	BBS1	Bardet-Biedl syndrome 1
chr11	66405778	66406185	408	180	4.48469	21.6374	18.006	Promoter (<=1kb)	11	66406088	66408663	5936	0	ENSG00000173933	RBM4	RNA binding motif protein 4
chr11	66444988	66445523	536	1517	23.195	156.343	151.781	Promoter (<=1kb)	11	66432470	66445219	83759	0	ENSG00000173914	RBM4B	RNA binding motif protein 4B
chr11	66610684	66611132	449	1910	21.5441	195.753	191.01	Promoter (<=1kb)	11	66610883	66614003	9986	0	ENSG00000173653	RCE1	Ras converting CAAX endopeptidase 1
chr11	66886533	66887306	774	2265	27.5221	231.422	226.527	Promoter (<=1kb)	11	66886740	67025550	22992	0	ENSG00000173120	KDM2A	lysine demethylase 2A
chr11	67034064	67034508	445	570	11.9961	61.0058	57.0042	Promoter (<=1kb)	11	67033905	67054029	156	159	ENSG00000173020	GRK2	G protein-coupled receptor kinase 2
chr11	67120726	67120945	220	85	3.33468	12.0153	8.56705	Promoter (<=1kb)	11	67118236	67121067	57804	122	ENSG00000175482	POLD4	DNA polymerase delta 4, accessory subunit
chr11	67169055	67169468	414	244	6.01084	28.1319	24.413	Promoter (<=1kb)	11	67165652	67169376	5499	0	ENSG00000172531	PPP1CA	protein phosphatase 1 catalytic subunit alpha
chr11	67195718	67196188	471	822	14.2606	86.3863	82.222	Promoter (<=1kb)	11	67195935	67202879	6199	0	ENSG00000175634	RPS6KB2	ribosomal protein S6 kinase B2
chr11	67236585	67237005	421	244	4.9729	28.2181	24.4984	Promoter (<=1kb)	11	67231819	67236748	80194	0	ENSG00000172663	TMEM134	transmembrane protein 134
chr11	67250297	67250720	424	1135	11.3031	117.868	113.52	Promoter (<=1kb)	11	67250505	67258579	9049	0	ENSG00000110711	AIP	aryl hydrocarbon receptor interacting protein
chr11	67572590	67572970	381	491	7.76648	53.0445	49.1003	Promoter (<=1kb)	11	67559238	67572807	645332	0	ENSG00000160172	FAM86C2P	family with sequence similarity 86, member A pseudogene
chr11	67797801	67798148	348	185	4.95101	22.1492	18.5091	Promoter (<=1kb)	11	67798084	67801197	4728	0	ENSG00000110717	NDUFS8	NADH:ubiquinone oxidoreductase core subunit S8
chr11	67980540	67981124	585	2231	29.7737	228.027	223.146	Promoter (<=1kb)	11	67923507	67980784	51111	0	ENSG00000110066	KMT5B	lysine methyltransferase 5B
chr11	68080087	68080345	259	137	5.19075	17.3231	13.761	Promoter (<=1kb)	11	68080108	68216743	4041	0	ENSG00000162337	LRP5	LDL receptor related protein 5
chr11	68227662	68228581	920	1389	17.9409	143.468	138.971	Promoter (<=1kb)	11	68228186	68321725	55291	0	ENSG00000110075	PPP6R3	protein phosphatase 6 regulatory subunit 3
chr11	68671045	68671496	452	1274	14.224	131.881	127.45	Promoter (<=1kb)	11	68658746	68671303	219927	0	ENSG00000197345	MRPL21	mitochondrial ribosomal protein L21
chr11	69258107	69258419	313	263	5.47146	30.1062	26.3649	Distal Intergenic	11	69061622	69156450	26579	196485	ENSG00000172927	MYEOV	myeloma overexpressed
chr11	71498433	71498933	501	598	9.43193	63.8594	59.8381	Promoter (<=1kb)	11	71498557	71512280	55199	0	ENSG00000158483	FAM86C1	family with sequence similarity 86 member C1
chr11	71639951	71640236	286	283	5.80442	32.1516	28.3882	Promoter (<=1kb)	11	71639768	71708643	55298	183	ENSG00000137522	RNF121	ring finger protein 121
chr11	71752870	71753139	270	123	4.94742	15.8467	12.3116	Promoter (<=1kb)	11	71728045	71752132	4926	-738	ENSG00000137497	NUMA1	nuclear mitotic apparatus protein 1
chr11	71934724	71935146	423	226	6.09313	26.351	22.6539	Promoter (<=1kb)	11	71935882	71950188	3636	-736	ENSG00000165458	INPPL1	inositol polyphosphate phosphatase like 1
chr11	72145326	72145769	444	987	20.6751	103.007	98.747	Promoter (<=1kb)	11	72003470	72145684	81570	0	ENSG00000162129	CLPB	ClpB homolog, mitochondrial AAA ATPase chaperonin
chr11	72525307	72525698	392	538	9.67212	57.8052	53.8262	Promoter (<=1kb)	11	72525451	72530043	89849	0	ENSG00000168010	ATG16L2	autophagy related 16 like 2
chr11	73019491	73019787	297	56	3.02484	8.99946	5.64643	Promoter (<=1kb)	11	73019663	73080425	9828	0	ENSG00000110237	ARHGEF17	Rho guanine nucleotide exchange factor 17
chr11	73472123	73472658	536	1657	19.4184	170.351	165.718	Promoter (<=1kb)	11	73386683	73472201	5870	0	ENSG00000175582	RAB6A	RAB6A, member RAS oncogene family
chr11	73490359	73490776	418	1608	14.0957	165.501	160.891	Distal Intergenic	11	73498917	73575656	51642	-8141	ENSG00000175581	MRPL48	mitochondrial ribosomal protein L48
chr11	73498922	73499265	344	341	5.26667	37.9731	34.1528	Promoter (<=1kb)	11	73498917	73575656	51642	5	ENSG00000175581	MRPL48	mitochondrial ribosomal protein L48
chr11	74109221	74109543	323	43	3.07723	7.62382	4.32509	Promoter (<=1kb)	11	74041361	74109502	283209	0	ENSG00000165434	PGM2L1	phosphoglucomutase 2 like 1
chr11	74303539	74303776	238	56	3.49362	8.95971	5.60798	Promoter (<=1kb)	11	74303575	74354105	10714	0	ENSG00000077514	POLD3	DNA polymerase delta 3, accessory subunit
chr11	74459741	74460338	598	1290	15.8227	133.484	129.043	Promoter (<=1kb)	11	74459913	74553458	254225	0	ENSG00000166439	RNF169	ring finger protein 169
chr11	74660105	74660537	433	1238	10.1879	128.282	123.871	Promoter (<=1kb)	11	74518784	74660232	143570	0	ENSG00000166435	XRRA1	X-ray radiation resistance associated 1
chr11	75110471	75110838	368	106	3.76061	14.1797	10.6811	Promoter (<=1kb)	11	75110535	75114989	6188	0	ENSG00000149273	RPS3	ribosomal protein S3
chr11	75947400	75947622	223	100	4.00575	13.5654	10.0785	Distal Intergenic	11	75902608	75921803	7481	-25597	ENSG00000085741	WNT11	Wnt family member 11
chr11	76155572	76156264	693	681	12.2751	72.1913	68.114	Promoter (<=1kb)	11	76156069	76164970	56946	0	ENSG00000158636	EMSY	EMSY, BRCA2 interacting transcriptional repressor
chr11	77531358	77532095	738	2297	23.3443	234.696	229.788	Promoter (<=1kb)	11	77377274	77531880	51773	0	ENSG00000048649	RSF1	remodeling and spacing factor 1
chr11	77850420	77850861	442	1135	11.3031	117.868	113.52	Promoter (<=1kb)	11	77850839	77885023	100289388	0	ENSG00000246174	KCTD21-AS1	KCTD21 antisense RNA 1
chr11	82444679	82444909	231	49	3.27224	8.25967	4.93681	Promoter (<=1kb)	11	82443046	82444906	220382	0	ENSG00000182103	FAM181B	family with sequence similarity 181 member B
chr11	82783166	82783394	229	39	3.13221	7.19373	3.91909	Promoter (<=1kb)	11	82783108	82784754	100506233	58	ENSG00000246067	RAB30-AS1	RAB30 antisense RNA 1 (head to head)
chr11	82868007	82868559	553	548	8.73177	58.87	54.8833	Promoter (<=1kb)	11	82868137	82881037	51585	0	ENSG00000165494	PCF11	PCF11 cleavage and polyadenylation factor subunit
chr11	82869040	82869337	298	123	7.19221	15.9176	12.3817	Promoter (<=1kb)	11	82868137	82896835	51585	903	ENSG00000165494	PCF11	PCF11 cleavage and polyadenylation factor subunit
chr11	82997150	82997515	366	190	4.68982	22.6502	19.0033	Promoter (<=1kb)	11	82972502	82997377	60492	0	ENSG00000137500	CCDC90B	coiled-coil domain containing 90B
chr11	85339492	85339771	280	100	4.00575	13.5654	10.0785	Promoter (<=1kb)	11	85339617	85346128	55863	0	ENSG00000171204	TMEM126B	transmembrane protein 126B
chr11	85358804	85359286	483	1567	23.5791	161.385	156.797	Promoter (<=1kb)	11	85358963	85367597	84233	0	ENSG00000171202	TMEM126A	transmembrane protein 126A
chr11	85779763	85780444	682	1310	14.943	135.537	131.084	Promoter (<=1kb)	11	85668214	85780139	8301	0	ENSG00000073921	PICALM	phosphatidylinositol binding clathrin assembly protein
chr11	86013388	86013632	245	188	5.94374	22.4843	18.8404	Promoter (<=1kb)	11	86013253	86056985	51501	135	ENSG00000149196	HIKESHI	Hikeshi, heat shock protein nuclear import factor
chr11	86748928	86749154	227	77	3.35185	11.1998	7.77463	Promoter (<=1kb)	11	86748886	87039876	65084	42	ENSG00000166575	TMEM135	transmembrane protein 135
chr11	94706479	94706878	400	111	3.75186	14.658	11.1477	Promoter (<=1kb)	11	94695787	94706776	51503	0	ENSG00000150316	CWC15	CWC15 spliceosome associated protein homolog
chr11	94800252	94800873	622	719	12.9703	76.0531	71.9516	5' UTR	11	94822974	94865815	23052	-22101	ENSG00000149218	ENDOD1	endonuclease domain containing 1
chr11	94822643	94823207	565	754	13.3714	79.6064	75.483	Promoter (<=1kb)	11	94822974	94865815	23052	0	ENSG00000149218	ENDOD1	endonuclease domain containing 1
chr11	95522489	95522798	310	129	4.23086	16.4798	12.9337	Promoter (<=1kb)	11	95502106	95522954	143684	156	ENSG00000077458	FAM76B	family with sequence similarity 76 member B
chr11	95523666	95524054	389	441	9.43246	48.0471	44.1415	Promoter (<=1kb)	11	95523625	95565857	9702	41	ENSG00000166037	CEP57	centrosomal protein 57
chr11	95656970	95657442	473	362	8.77727	40.1143	36.2745	Promoter (<=1kb)	11	95566044	95657371	8898	0	ENSG00000087053	MTMR2	myotubularin related protein 2
chr11	101785561	101786000	440	822	10.7965	86.4201	82.2556	Promoter (<=1kb)	11	101785746	101871793	57562	0	ENSG00000110318	CEP126	centrosomal protein 126
chr11	101918094	101918466	373	53	3.2046	8.67267	5.33013	Promoter (<=1kb)	11	101918169	101946842	85016	0	ENSG00000137691	CFAP300	cilia and flagella associated protein 300
chr11	102322476	102322781	306	191	9.24097	22.822	19.1722	Promoter (<=1kb)	11	102267056	102323775	114908	994	ENSG00000152558	TMEM123	transmembrane protein 123
chr11	102323083	102323336	254	114	5.12626	14.9569	11.4407	Promoter (<=1kb)	11	102267056	102323775	114908	439	ENSG00000152558	TMEM123	transmembrane protein 123
chr11	105948379	105948760	382	86	3.67845	12.049	8.60033	Promoter (<=1kb)	11	105921825	105948465	143879	0	ENSG00000182359	KBTBD3	kelch repeat and BTB domain containing 3
chr11	107436290	107436572	283	286	8.42359	32.4542	28.6867	Promoter (<=1kb)	11	107373453	107436424	91801	0	ENSG00000137760	ALKBH8	alkB homolog 8, tRNA methyltransferase
chr11	109963696	109964136	441	118	4.79894	15.3802	11.855	Promoter (<=1kb)	11	109963926	110042566	85463	0	ENSG00000149289	ZC3H12C	zinc finger CCCH-type containing 12C
chr11	109964383	109964618	236	95	4.68559	13.0385	9.56549	Promoter (<=1kb)	11	109964087	110042566	85463	296	ENSG00000149289	ZC3H12C	zinc finger CCCH-type containing 12C
chr11	110166882	110167607	726	1633	24.4158	167.944	163.323	Promoter (<=1kb)	11	110045605	110167437	5962	0	ENSG00000137710	RDX	radixin
chr11	110300725	110300966	242	141	4.60661	17.6881	14.1195	Promoter (<=1kb)	11	110300661	110335608	2230	64	ENSG00000137714	FDX1	ferredoxin 1
chr11	111636581	111637164	584	203	6.4088	23.9847	20.3186	Promoter (<=1kb)	11	111597632	111637169	5519	5	ENSG00000137713	PPP2R1B	protein phosphatase 2 scaffold subunit Abeta
chr11	111957302	111957620	319	285	5.25263	32.3234	28.5576	Promoter (<=1kb)	11	111955539	111957522	26521	0	ENSG00000150779	TIMM8B	translocase of inner mitochondrial membrane 8 homolog B
chr11	113018005	113018216	212	50	5.1988	8.42311	5.09023	Intron (uc001pno.3/4684, intron 1 of 8)	11	113126599	113149158	4684	-108383	ENSG00000149294	NCAM1	neural cell adhesion molecule 1
chr11	113746063	113746371	309	295	8.16199	33.2865	29.5107	Promoter (<=1kb)	11	113668597	113746256	57646	0	ENSG00000048028	USP28	ubiquitin specific peptidase 28
chr11	113930189	113930538	350	210	6.9601	24.7349	21.0594	Promoter (<=1kb)	11	113930431	114060486	7704	0	ENSG00000109906	ZBTB16	zinc finger and BTB domain containing 16
chr11	116643509	116643826	318	248	6.00862	28.5406	24.8165	Promoter (<=1kb)	11	116618886	116643714	84811	0	ENSG00000137656	BUD13	BUD13 homolog
chr11	116658491	116658871	381	411	6.31646	45.043	41.161	Promoter (<=1kb)	11	116649276	116658739	8882	0	ENSG00000109917	ZPR1	ZPR1 zinc finger
chr11	116968749	116969363	615	1215	17.1067	125.98	121.583	Promoter (<=1kb)	11	116714118	116968993	23387	0	ENSG00000160584	SIK3	SIK family kinase 3
chr11	118442896	118443554	659	628	10.3989	66.8933	62.8515	Promoter (<=1kb)	11	118443102	118473747	372	0	ENSG00000095139	ARCN1	archain 1
chr11	118661391	118662414	1024	2265	27.5221	231.422	226.527	Promoter (<=1kb)	11	118618473	118661657	1656	0	ENSG00000110367	DDX6	DEAD-box helicase 6
chr11	118938305	118938745	441	1973	16.5073	202.073	197.303	Promoter (<=1kb)	11	118938493	118952688	55823	0	ENSG00000160695	VPS11	VPS11, CORVET/HOPS core subunit
chr11	118972399	118973020	622	651	12.4185	69.2421	65.1844	Promoter (<=1kb)	11	118967213	118972785	1798	0	ENSG00000172269	DPAGT1	dolichyl-phosphate N-acetylglucosaminephosphotransferase 1
chr11	119205087	119205546	460	1518	19.8775	156.429	151.865	Promoter (<=1kb)	11	119205210	119208024	79102	0	ENSG00000173456	RNF26	ring finger protein 26
chr11	119599476	119599953	478	28	2.7589	6.04115	2.83125	Promoter (<=1kb)	11	119545099	119599435	5818	-41	ENSG00000110400	NECTIN1	nectin cell adhesion molecule 1
chr11	120039985	120040211	227	78	3.42746	11.2888	7.86138	Distal Intergenic	11	119981994	120008863	23650	-31122	ENSG00000137699	TRIM29	tripartite motif containing 29
chr11	121260270	121260476	207	21	3.69639	5.35696	2.19874	Distal Intergenic	11	121322912	121504471	6653	-62436	ENSG00000137642	SORL1	sortilin related receptor 1
chr11	121322913	121323149	237	62	3.54235	9.59166	6.21566	Promoter (<=1kb)	11	121322912	121504471	6653	1	ENSG00000137642	SORL1	sortilin related receptor 1
chr11	122932841	122933640	800	481	8.34341	52.1361	48.1988	Promoter (<=1kb)	11	122928200	122932901	3312	0	ENSG00000109971	HSPA8	heat shock protein family A (Hsp70) member 8
chr11	123065520	123065771	252	42	3.00431	7.57307	4.27658	Promoter (<=1kb)	11	122943033	123066007	79827	236	ENSG00000166250	CLMP	CXADR like membrane protein
chr11	124669701	124670485	785	1621	18.8079	166.787	162.171	Promoter (<=1kb)	11	124636394	124670299	79684	0	ENSG00000120458	MSANTD2	Myb/SANT DNA binding domain containing 2
chr11	125439171	125439419	249	65	4.11279	9.94497	6.55804	Promoter (<=1kb)	11	125439298	125454575	9538	0	ENSG00000149547	EI24	EI24, autophagy associated transmembrane protein
chr11	125952643	125952899	257	156	5.42689	19.1991	15.6045	Distal Intergenic	11	125826713	125933187	50937	-19456	ENSG00000064309	CDON	cell adhesion associated, oncogene regulated
chr11	126081352	126081748	397	1839	17.5768	188.672	183.957	Promoter (<=1kb)	11	126081619	126132879	79607	0	ENSG00000197798	FAM118B	family with sequence similarity 118 member B
chr11	126138595	126138868	274	138	4.45614	17.4089	13.8452	Promoter (<=1kb)	11	126132814	126138877	6734	9	ENSG00000182934	SRPRA	SRP receptor alpha subunit
chr11	126173679	126174156	478	558	10.0424	59.888	55.894	Promoter (<=1kb)	11	126173647	126215644	28960	32	ENSG00000110063	DCPS	decapping enzyme, scavenger
chr11	129872195	129872674	480	1310	14.943	135.537	131.084	Promoter (<=1kb)	11	129872519	129875381	440072	0	NA	LINC00167	long intergenic non-protein coding RNA 167
chr11	129939742	129940054	313	89	3.92613	12.445	8.98466	Promoter (<=1kb)	11	129939716	130014706	334	26	ENSG00000084234	APLP2	amyloid beta precursor like protein 2
chr11	133938815	133939149	335	350	7.67283	38.8587	35.0306	Promoter (<=1kb)	11	133938820	134021652	83700	0	ENSG00000166086	JAM3	junctional adhesion molecule 3
chr11	134093533	134093935	403	19	2.78643	5.10445	1.96049	Promoter (<=1kb)	11	134022337	134094426	23310	491	ENSG00000151503	NCAPD3	non-SMC condensin II complex subunit D3
chr12	498112	498386	275	151	4.33288	18.7339	15.1485	Promoter (<=1kb)	12	498516	551806	84318	-130	ENSG00000120647	CCDC77	coiled-coil domain containing 77
chr12	861580	861832	253	106	4.73694	14.1813	10.6821	Promoter (<=1kb)	12	862089	936665	65125	-257	ENSG00000060237	WNK1	WNK lysine deficient protein kinase 1
chr12	1194413	1194821	409	79	6.31282	11.3568	7.92535	Promoter (2-3kb)	12	1192307	1553916	23085	2106	ENSG00000082805	ERC1	ELKS/RAB6-interacting/CAST family member 1
chr12	2113327	2113798	472	490	11.5618	52.9844	49.0408	Promoter (<=1kb)	12	2050757	2113677	196513	0	ENSG00000151065	DCP1B	decapping mRNA 1B
chr12	2364991	2365241	251	542	19.6812	58.2345	54.2524	Intron (uc001qjz.2/775, intron 3 of 46)	12	2378942	2397911	100874370	-13701	NA	CACNA1C-IT3	CACNA1C intronic transcript 3
chr12	2986218	2986670	453	76	4.81952	11.0498	7.62978	Promoter (<=1kb)	12	2966847	2986321	2305	0	ENSG00000111206	FOXM1	forkhead box M1
chr12	4430152	4430480	329	233	5.39825	27.0769	23.3706	Promoter (<=1kb)	12	4430359	4469190	57103	0	ENSG00000078237	TIGAR	TP53 induced glycolysis regulatory phosphatase
chr12	6579493	6579750	258	73	4.01142	10.7919	7.37855	Promoter (<=1kb)	12	6571404	6579843	6843	93	ENSG00000139190	VAMP1	vesicle associated membrane protein 1
chr12	6602220	6602598	379	763	10.6222	80.4675	76.3385	Promoter (<=1kb)	12	6601316	6602471	51258	0	ENSG00000111639	MRPL51	mitochondrial ribosomal protein L51
chr12	6644261	6644898	638	211	5.40425	24.8232	21.1456	Promoter (<=1kb)	12	6644409	6647537	2597	0	ENSG00000111640	GAPDH	glyceraldehyde-3-phosphate dehydrogenase
chr12	6716352	6716636	285	110	4.65162	14.5806	11.0711	Promoter (<=1kb)	12	6679248	6716551	1108	0	ENSG00000111642	CHD4	chromodomain helicase DNA binding protein 4
chr12	6772257	6772626	370	81	4.38329	11.5628	8.12582	Promoter (<=1kb)	12	6759704	6772308	51147	0	ENSG00000111653	ING4	inhibitor of growth family member 4
chr12	6961133	6961640	508	278	5.38914	31.5869	27.8283	Promoter (<=1kb)	12	6961285	6975795	8078	0	ENSG00000111667	USP5	ubiquitin specific peptidase 5
chr12	6976549	6976764	216	104	3.96141	13.9492	10.4544	Promoter (<=1kb)	12	6976584	6980110	7167	0	ENSG00000111669	TPI1	triosephosphate isomerase 1
chr12	7000292	7000498	207	35	3.2044	6.77922	3.52302	Distal Intergenic	12	6993846	6994950	171220	6446	ENSG00000248593	DSTNP2	destrin, actin depolymerizing factor pseudogene 2
chr12	7079825	7080236	412	129	4.81879	16.4628	12.9171	Promoter (<=1kb)	12	7079944	7085136	10436	0	ENSG00000126749	EMG1	EMG1, N1-specific pseudouridine methyltransferase
chr12	7125624	7125853	230	104	3.59409	13.9256	10.4311	Promoter (<=1kb)	12	7085347	7125792	10162	0	ENSG00000111684	LPCAT3	lysophosphatidylcholine acyltransferase 3
chr12	8234630	8235117	488	710	11.6221	75.1338	71.0381	Promoter (<=1kb)	12	8234807	8250373	25977	0	ENSG00000089818	NECAP1	NECAP endocytosis associated 1
chr12	8332832	8333066	235	71	3.60779	10.5426	7.13577	Promoter (<=1kb)	12	8332805	8368747	440078	27	ENSG00000226711	FAM66C	family with sequence similarity 66 member C
chr12	8395345	8396086	742	233	5.48846	27.1058	23.3991	Promoter (<=1kb)	12	8383645	8395542	653113	0	NA	FAM86FP	family with sequence similarity 86, member A pseudogene
chr12	10766055	10766341	287	28	2.44308	6.10435	2.88934	Promoter (<=1kb)	12	10756364	10766208	55110	0	ENSG00000111196	MAGOHB	mago homolog B, exon junction complex core component
chr12	10875784	10876113	330	100	4.00575	13.5654	10.0785	Promoter (<=1kb)	12	10851676	10875953	8531	0	ENSG00000060138	YBX3	Y-box binding protein 3
chr12	11323834	11324413	580	768	10.9981	80.9741	76.842	Promoter (<=1kb)	12	10998448	11324224	100533464	0	ENSG00000275778	PRH1-PRR4	PRH1-PRR4 readthrough
chr12	12714746	12715016	271	44	4.04076	7.80453	4.49908	Promoter (<=1kb)	12	12626216	12715448	80824	432	ENSG00000111266	DUSP16	dual specificity phosphatase 16
chr12	12764427	12764910	484	115	4.90775	15.0315	11.5128	Promoter (<=1kb)	12	12764831	12798041	1389	0	ENSG00000111269	CREBL2	cAMP responsive element binding protein like 2
chr12	12870123	12870595	473	249	5.56962	28.6422	24.9165	Promoter (<=1kb)	12	12870302	12875305	1027	0	ENSG00000111276	CDKN1B	cyclin dependent kinase inhibitor 1B
chr12	12877925	12878354	430	677	11.2836	71.7937	67.7192	Promoter (<=1kb)	12	12878851	12982915	51202	-497	ENSG00000213782	DDX47	DEAD-box helicase 47
chr12	12939907	12940151	245	154	4.85699	18.9919	15.4017	Promoter (1-2kb)	12	12938541	12944399	81575	1366	ENSG00000178878	APOLD1	apolipoprotein L domain containing 1
chr12	12966076	12966454	379	618	13.3786	65.9333	61.8977	Promoter (<=1kb)	12	12966141	12974982	51202	0	ENSG00000213782	DDX47	DEAD-box helicase 47
chr12	13197154	13197650	497	296	6.79114	33.4685	29.6908	Promoter (<=1kb)	12	13197315	13236383	57613	0	ENSG00000084444	FAM234B	family with sequence similarity 234 member B
chr12	13254060	13254414	355	118	5.13903	15.353	11.8284	Promoter (2-3kb)	12	13236471	13256630	83445	2216	ENSG00000111305	GSG1	germ cell associated 1
chr12	14518648	14519088	441	273	6.30905	31.0605	27.3082	Promoter (<=1kb)	12	14518611	14651697	55729	37	ENSG00000171681	ATF7IP	activating transcription factor 7 interacting protein
chr12	14956062	14956617	556	91	4.78988	12.6556	9.19056	Promoter (<=1kb)	12	14956506	14976791	144608	0	ENSG00000182993	C12orf60	chromosome 12 open reading frame 60
chr12	16064183	16064463	281	57	3.61793	9.09627	5.73998	Promoter (<=1kb)	12	16064186	16185982	51071	0	ENSG00000023697	DERA	deoxyribose-phosphate aldolase
chr12	19282601	19282964	364	250	7.86653	28.7778	25.051	Promoter (<=1kb)	12	19282626	19354937	54477	0	ENSG00000052126	PLEKHA5	pleckstrin homology domain containing A5
chr12	19592385	19592884	500	940	13.8788	98.317	94.0844	Promoter (<=1kb)	12	19592608	19675173	121536	0	ENSG00000139154	AEBP2	AE binding protein 2
chr12	21810339	21810547	209	71	4.04033	10.5964	7.18764	Promoter (<=1kb)	12	21788275	21810728	3945	181	ENSG00000111716	LDHB	lactate dehydrogenase B
chr12	22199178	22199410	233	32	3.45906	6.52958	3.29413	Promoter (<=1kb)	12	22199110	22218606	55907	68	ENSG00000111726	CMAS	cytidine monophosphate N-acetylneuraminic acid synthetase
chr12	22697045	22697683	639	357	6.54019	39.6313	35.7962	Promoter (<=1kb)	12	22601518	22697187	9847	0	ENSG00000111731	C2CD5	C2 calcium dependent domain containing 5
chr12	25403441	25404014	574	78	4.17965	11.2862	7.85917	Promoter (<=1kb)	12	25358180	25403854	3845	0	ENSG00000133703	KRAS	KRAS proto-oncogene, GTPase
chr12	27175312	27175841	530	310	5.94044	34.88	31.0892	Promoter (<=1kb)	12	27175455	27183606	9412	0	ENSG00000152944	MED21	mediator complex subunit 21
chr12	27485848	27486120	273	72	3.95031	10.6095	7.20048	Promoter (<=1kb)	12	27485787	27578746	56938	61	ENSG00000029153	ARNTL2	aryl hydrocarbon receptor nuclear translocator like 2
chr12	27863562	27864043	482	2066	22.6018	211.509	206.698	Promoter (<=1kb)	12	27863706	27909237	60488	0	ENSG00000061794	MRPS35	mitochondrial ribosomal protein S35
chr12	27932914	27933450	537	271	7.55428	30.8895	27.1387	Promoter (<=1kb)	12	27933187	27955973	57542	0	ENSG00000087448	KLHL42	kelch like family member 42
chr12	30848661	30849110	450	1322	14.5667	136.676	132.216	Promoter (<=1kb)	12	30781915	30848929	10526	0	ENSG00000133704	IPO8	importin 8
chr12	31477048	31477496	449	58	3.3469	9.16836	5.80983	Promoter (<=1kb)	12	31433520	31477096	58516	0	ENSG00000139146	SINHCAF	SIN3-HDAC complex associated factor
chr12	32259608	32260087	480	342	7.1102	38.0723	34.2505	Promoter (<=1kb)	12	32260185	32531141	636	-98	ENSG00000151746	BICD1	BICD cargo adaptor 1
chr12	32832041	32832310	270	136	4.93926	17.2144	13.6542	Promoter (<=1kb)	12	32832137	32884068	10059	0	ENSG00000087470	DNM1L	dynamin 1 like
chr12	32908259	32908947	689	96	4.03224	13.1024	9.62724	Promoter (<=1kb)	12	32899478	32908887	51067	0	ENSG00000139131	YARS2	tyrosyl-tRNA synthetase 2
chr12	34833607	34834272	666	104	5.27962	13.9047	10.4105	Distal Intergenic	12	34175216	34181236	84920	658391	ENSG00000139133	ALG10	ALG10, alpha-1,2-glucosyltransferase
chr12	34835459	34835673	215	120	7.79819	15.6075	12.0775	Distal Intergenic	12	34175216	34181236	84920	660243	ENSG00000139133	ALG10	ALG10, alpha-1,2-glucosyltransferase
chr12	39836762	39837112	351	144	4.97941	18.0527	14.478	Promoter (<=1kb)	12	39687030	39837192	55605	80	ENSG00000139116	KIF21A	kinesin family member 21A
chr12	42631622	42632019	398	197	6.99779	23.4331	19.7748	Promoter (<=1kb)	12	42550907	42632154	10138	135	ENSG00000015153	YAF2	YY1 associated factor 2
chr12	44199778	44200475	698	224	6.26443	26.1178	22.4233	Promoter (<=1kb)	12	44187526	44200178	5756	0	ENSG00000151239	TWF1	twinfilin actin binding protein 1
chr12	46121049	46121601	553	3802	41.0502	385.544	380.213	Promoter (<=1kb)	12	46119503	46121704	400027	103	NA	LINC00938	long intergenic non-protein coding RNA 938
chr12	48499652	48499902	251	49	3.79887	8.32163	4.99726	Promoter (<=1kb)	12	48436681	48499775	29843	0	ENSG00000079387	SENP1	SUMO specific peptidase 1
chr12	49075558	49076130	573	860	11.4323	90.2363	86.0491	Promoter (<=1kb)	12	49046995	49076008	54934	0	ENSG00000139620	KANSL2	KAT8 regulatory NSL complex subunit 2
chr12	49245673	49246155	483	1185	16.1355	122.911	118.532	Promoter (<=1kb)	12	49223539	49245957	9416	0	ENSG00000174243	DDX23	DEAD-box helicase 23
chr12	49412498	49412747	250	32	2.74953	6.51286	3.28039	Promoter (<=1kb)	12	49396055	49412531	5571	0	ENSG00000181929	PRKAG1	protein kinase AMP-activated non-catalytic subunit gamma 1
chr12	49453915	49454545	631	693	10.3345	73.4597	69.3744	Distal Intergenic	12	49412758	49449107	8085	-4808	ENSG00000167548	KMT2D	lysine methyltransferase 2D
chr12	49525174	49525529	356	321	8.69911	35.9878	32.1865	Promoter (<=1kb)	12	49521567	49525178	10376	0	ENSG00000123416	TUBA1B	tubulin alpha 1b
chr12	49716640	49716903	264	131	3.52877	16.7257	13.1742	Promoter (<=1kb)	12	49716971	49718171	10024	-68	ENSG00000135451	TROAP	trophinin associated protein
chr12	50236729	50237044	316	703	11.1417	74.4769	70.3854	Promoter (<=1kb)	12	50229826	50236912	144233	0	ENSG00000186666	BCDIN3D	BCDIN3 domain containing RNA methyltransferase
chr12	50419139	50419553	415	580	12.8071	62.1094	58.0999	Promoter (<=1kb)	12	50382945	50419307	29127	0	ENSG00000161800	RACGAP1	Rac GTPase activating protein 1
chr12	50478897	50479373	477	953	11.8247	99.5501	95.3103	Promoter (<=1kb)	12	50478983	50483205	6602	0	ENSG00000066117	SMARCD1	SWI/SNF related, matrix associated, actin dependent regulator of chromatin, subfamily d, member 1
chr12	50560867	50561272	406	264	6.43108	30.2364	26.4934	Promoter (<=1kb)	12	50523581	50561097	91012	0	ENSG00000139624	CERS5	ceramide synthase 5
chr12	50898638	50899058	421	331	8.01113	37.0018	33.1898	Promoter (<=1kb)	12	50898768	51074044	57609	0	ENSG00000066084	DIP2B	disco interacting protein 2 homolog B
chr12	51157508	51157929	422	1432	18.7796	147.725	143.205	Promoter (<=1kb)	12	51157789	51214943	466	0	ENSG00000123268	ATF1	activating transcription factor 1
chr12	51663818	51664128	311	19	3.02082	5.12322	1.97826	Promoter (<=1kb)	12	51639133	51663994	57228	0	ENSG00000170545	SMAGP	small cell adhesion glycoprotein
chr12	51984882	51985317	436	1553	23.4279	159.942	155.36	Promoter (<=1kb)	12	51985020	52206648	6334	0	ENSG00000196876	SCN8A	sodium voltage-gated channel alpha subunit 8
chr12	52214828	52215159	332	184	6.34822	22.0501	18.4116	Exon (uc001rzc.3/401720, exon 2 of 2)	12	52211676	52225701	401720	10542	ENSG00000261308	FIGNL2	fidgetin like 2
chr12	52345500	52345808	309	51	3.48872	8.47316	5.13784	Promoter (<=1kb)	12	52345451	52390863	91	49	ENSG00000135503	ACVR1B	activin A receptor type 1B
chr12	53400049	53400449	401	298	6.30174	33.64	29.8611	Promoter (<=1kb)	12	53400062	53421703	1975	0	ENSG00000063046	EIF4B	eukaryotic translation initiation factor 4B
chr12	53548905	53549115	211	49	4.71311	8.22707	4.90572	Downstream (2-3kb)	12	53551447	53558277	51380	9162	ENSG00000139631	CSAD	cysteine sulfinic acid decarboxylase
chr12	53574080	53574509	430	1361	15.8335	140.658	136.175	Promoter (<=1kb)	12	53551447	53574430	51380	0	ENSG00000139631	CSAD	cysteine sulfinic acid decarboxylase
chr12	53645695	53646112	418	2111	21.3606	215.976	211.146	Promoter (<=1kb)	12	53645876	53648190	84975	0	ENSG00000182544	MFSD5	major facilitator superfamily domain containing 5
chr12	53718641	53718854	214	33	2.86501	6.5536	3.31682	Downstream (1-2kb)	12	53701240	53715412	8086	-3229	ENSG00000094914	AAAS	aladin WD repeat nucleoporin
chr12	53846359	53846601	243	28	2.70388	6.02859	2.82005	Promoter (<=1kb)	12	53845886	53874946	5094	473	ENSG00000197111	PCBP2	poly(rC) binding protein 2
chr12	54069477	54069897	421	638	10.636	67.8777	63.8291	Promoter (<=1kb)	12	54058944	54070109	517	212	ENSG00000135390	ATP5MC2	ATP synthase membrane subunit c locus 2
chr12	54426985	54427259	275	137	5.41665	17.2671	13.7066	Promoter (<=1kb)	12	54426832	54429144	3222	153	ENSG00000172789	HOXC5	homeobox C5
chr12	54673852	54674093	242	40	3.34372	7.37432	4.09353	Promoter (<=1kb)	12	54624731	54673915	23468	0	ENSG00000094916	CBX5	chromobox 5
chr12	54718845	54719068	224	58	3.22359	9.16391	5.80546	Promoter (<=1kb)	12	54718874	54745635	22818	0	ENSG00000111481	COPZ1	coatomer protein complex subunit zeta 1
chr12	56320642	56321055	414	1299	17.151	134.385	129.938	Promoter (<=1kb)	12	56295197	56321051	84305	0	ENSG00000170473	PYM1	PYM homolog 1, exon junction complex associated factor
chr12	56546188	56546410	223	119	3.92411	15.4375	11.9113	Promoter (<=1kb)	12	56546204	56550026	140465	0	ENSG00000196465	MYL6B	myosin light chain 6B
chr12	56583099	56583346	248	81	4.27601	11.5644	8.12727	Promoter (<=1kb)	12	56555636	56583351	6601	5	ENSG00000139613	SMARCC2	SWI/SNF related, matrix associated, actin dependent regulator of chromatin subfamily c member 2
chr12	56862162	56862544	383	881	13.854	92.3208	88.1225	Promoter (<=1kb)	12	56862301	56863623	283377	0	ENSG00000176422	SPRYD4	SPRY domain containing 4
chr12	57023783	57024279	497	631	8.33521	67.1953	63.1514	Promoter (<=1kb)	12	56989380	57023995	11176	0	ENSG00000076108	BAZ2A	bromodomain adjacent to zinc finger domain 2A
chr12	57039614	57039825	212	55	2.66104	8.88728	5.53768	Promoter (<=1kb)	12	57031959	57039852	506	27	ENSG00000110955	ATP5F1B	ATP synthase F1 subunit beta
chr12	57118945	57119247	303	125	4.00587	16.0798	12.541	Promoter (<=1kb)	12	57106211	57119066	4666	0	ENSG00000196531	NACA	nascent polypeptide-associated complex alpha subunit
chr12	57146034	57146252	219	53	3.2046	8.67267	5.33013	Promoter (<=1kb)	12	57125364	57146146	5557	0	ENSG00000198056	PRIM1	DNA primase subunit 1
chr12	57998469	57998922	454	654	9.88993	69.5554	65.4961	Promoter (<=1kb)	12	57998604	58001396	196403	0	ENSG00000178498	DTX3	deltex E3 ubiquitin ligase 3
chr12	58148701	58149160	460	198	7.38561	23.4912	19.8325	Promoter (<=1kb)	12	58148881	58154193	92979	0	ENSG00000139266	MARCH9	membrane associated ring-CH-type finger 9
chr12	58165729	58166008	280	202	5.28188	23.9293	20.2641	Promoter (<=1kb)	12	58162351	58165914	4234	0	ENSG00000037897	METTL1	methyltransferase like 1
chr12	62653900	62654407	508	1139	12.5062	118.298	113.947	Promoter (<=1kb)	12	62102029	62653925	338811	0	ENSG00000198673	FAM19A2	family with sequence similarity 19 member A2, C-C motif chemokine like
chr12	62860377	62860842	466	718	14.0391	75.9822	71.881	Promoter (<=1kb)	12	62860597	62902925	23041	0	ENSG00000061987	MON2	MON2 homolog, regulator of endosome-to-Golgi trafficking
chr12	62996171	62996783	613	2064	21.7312	211.301	206.491	Promoter (<=1kb)	12	62995531	62997214	283416	431	ENSG00000221949	LINC01465	long intergenic non-protein coding RNA 1465
chr12	62997045	62997289	245	19	2.50359	5.07427	1.93501	Promoter (<=1kb)	12	62995531	62997214	283416	0	ENSG00000221949	LINC01465	long intergenic non-protein coding RNA 1465
chr12	64062259	64062480	222	109	3.9608	14.4982	10.992	Promoter (<=1kb)	12	63952693	64062354	283417	0	ENSG00000177990	DPY19L2	dpy-19 like 2
chr12	64173646	64173892	247	72	3.72358	10.6868	7.27575	Promoter (<=1kb)	12	64173906	64203338	10329	-14	ENSG00000118600	RXYLT1	ribitol xylosyltransferase 1
chr12	64798052	64798293	242	34	3.17361	6.69585	3.44376	Promoter (<=1kb)	12	64798153	64815251	11260	0	ENSG00000184575	XPOT	exportin for tRNA
chr12	65563162	65563762	601	714	10.5241	75.5874	71.4887	Promoter (<=1kb)	12	65563351	65642141	23592	0	ENSG00000174106	LEMD3	LEM domain containing 3
chr12	66563393	66563918	526	333	7.01006	37.1737	33.3597	Promoter (<=1kb)	12	66530717	66563807	51643	0	ENSG00000155957	TMBIM4	transmembrane BAX inhibitor motif containing 4
chr12	68042667	68043235	569	352	9.97838	39.0369	35.2066	Promoter (<=1kb)	12	68042512	68056444	8445	155	ENSG00000127334	DYRK2	dual specificity tyrosine phosphorylation regulated kinase 2
chr12	68726026	68726494	469	141	4.60661	17.6881	14.1195	Promoter (<=1kb)	12	68688346	68726161	56890	0	ENSG00000111554	MDM1	Mdm1 nuclear protein
chr12	68932923	68933136	214	79	6.31282	11.3568	7.92535	Distal Intergenic	12	69004619	69051493	5908	-71483	ENSG00000127314	RAP1B	RAP1B, member of RAS oncogene family
chr12	69633195	69633968	774	926	16.4751	96.888	92.6636	Promoter (<=1kb)	12	69633317	69668138	11052	0	ENSG00000111605	CPSF6	cleavage and polyadenylation specific factor 6
chr12	70637007	70637658	652	1001	14.109	104.458	100.188	Promoter (<=1kb)	12	70637494	70748773	4848	0	ENSG00000111596	CNOT2	CCR4-NOT transcription complex subunit 2
chr12	72057892	72058177	286	152	5.96191	18.8252	15.2373	Promoter (<=1kb)	12	72050124	72057749	196441	-143	ENSG00000133858	ZFC3H1	zinc finger C3H1-type containing
chr12	72148459	72148965	507	312	5.59451	35.0381	31.246	Promoter (<=1kb)	12	72148658	72181150	23011	0	ENSG00000080371	RAB21	RAB21, member RAS oncogene family
chr12	75905322	75905556	235	61	5.23655	9.49391	6.12061	Promoter (<=1kb)	12	75891419	75905418	11103	0	ENSG00000111615	KRR1	KRR1, small subunit processome component homolog
chr12	76425351	76425557	207	69	3.55609	10.3616	6.96082	Promoter (<=1kb)	12	76419227	76425556	22822	0	ENSG00000139289	PHLDA1	pleckstrin homology like domain family A member 1
chr12	77157802	77158339	538	1319	16.6595	136.397	131.939	Promoter (<=1kb)	12	77157854	77216311	23390	0	ENSG00000186908	ZDHHC17	zinc finger DHHC-type containing 17
chr12	77459587	77459915	329	96	5.09756	13.0922	9.6176	Promoter (<=1kb)	12	77415026	77459360	144455	-227	ENSG00000165891	E2F7	E2F transcription factor 7
chr12	80328531	80328820	290	151	4.33288	18.7339	15.1485	Promoter (<=1kb)	12	80167343	80328731	4659	0	ENSG00000058272	PPP1R12A	protein phosphatase 1 regulatory subunit 12A
chr12	82751997	82752549	553	984	16.3006	102.732	98.4734	Promoter (<=1kb)	12	82746083	82752199	29080	0	ENSG00000133773	CCDC59	coiled-coil domain containing 59
chr12	89745563	89745835	273	137	5.29422	17.2757	13.7142	Promoter (<=1kb)	12	89741837	89746296	1848	461	ENSG00000139318	DUSP6	dual specificity phosphatase 6
chr12	89747207	89747477	271	63	3.3184	9.73244	6.35237	Promoter (<=1kb)	12	89741837	89746296	1848	-911	ENSG00000139318	DUSP6	dual specificity phosphatase 6
chr12	93771535	93772142	608	111	3.75186	14.658	11.1477	Promoter (<=1kb)	12	93771701	93797024	11163	0	ENSG00000173598	NUDT4	nudix hydrolase 4
chr12	93835405	93835915	511	586	9.56652	62.7003	58.6866	Promoter (<=1kb)	12	93802088	93836026	7334	111	ENSG00000177889	UBE2N	ubiquitin conjugating enzyme E2 N
chr12	93861122	93861538	417	335	6.82642	37.3213	33.506	Promoter (<=1kb)	12	93861266	93897548	28977	0	ENSG00000198015	MRPL42	mitochondrial ribosomal protein L42
chr12	94070825	94071440	616	1144	24.799	118.791	114.436	Promoter (<=1kb)	12	94071151	94244531	8738	0	ENSG00000169372	CRADD	CASP2 and RIPK1 domain containing adaptor with death domain
chr12	94541814	94542023	210	19	2.78643	5.10445	1.96049	Promoter (<=1kb)	12	94542499	94701451	10154	-476	ENSG00000136040	PLXNC1	plexin C1
chr12	95397373	95397645	273	267	6.86678	30.5079	26.7609	Promoter (<=1kb)	12	95365104	95397489	55967	0	ENSG00000184752	NDUFA12	NADH:ubiquinone oxidoreductase subunit A12
chr12	95867806	95868062	257	90	3.25796	12.5186	9.05685	Promoter (<=1kb)	12	95867822	95909613	10988	0	ENSG00000111142	METAP2	methionyl aminopeptidase 2
chr12	96252569	96252945	377	130	4.5628	16.5505	13.0026	Promoter (<=1kb)	12	96252709	96260238	6636	0	ENSG00000139343	SNRPF	small nuclear ribonucleoprotein polypeptide F
chr12	96341832	96342065	234	52	3.12878	8.60766	5.26785	Intron (uc001tel.2/144193, intron 1 of 8)	12	96337071	96362370	144193	4761	ENSG00000139344	AMDHD1	amidohydrolase domain containing 1
chr12	96793820	96794339	520	163	5.5561	20.0058	16.3985	Promoter (<=1kb)	12	96672039	96794366	5128	27	ENSG00000059758	CDK17	cyclin dependent kinase 17
chr12	96883172	96883641	470	1486	25.6699	153.21	148.663	5' UTR	12	96672039	96794366	5128	-88806	ENSG00000059758	CDK17	cyclin dependent kinase 17
chr12	98897438	98897852	415	775	12.7698	81.6818	77.5456	Promoter (<=1kb)	12	98879322	98897633	643770	0	ENSG00000245017	LINC02453	long intergenic non-protein coding RNA 2453
chr12	98909206	98909481	276	200	4.90514	23.6826	20.0215	Promoter (<=1kb)	12	98909351	98929412	7112	0	ENSG00000120802	TMPO	thymopoietin
chr12	98987341	98987686	346	197	6.09595	23.4056	19.7475	Promoter (<=1kb)	12	98987403	98995778	5250	0	ENSG00000075415	SLC25A3	solute carrier family 25 member 3
chr12	99038549	99038998	450	62	3.61409	9.5778	6.20228	Promoter (<=1kb)	12	99007182	99038829	121457	0	ENSG00000166130	IKBIP	IKBKB interacting protein
chr12	100536083	100536844	762	2066	20.2541	211.412	206.602	Promoter (<=1kb)	12	100430863	100536642	23074	0	ENSG00000111647	UHRF1BP1L	UHRF1 binding protein 1 like
chr12	101673701	101674199	499	1771	16.6489	181.84	177.153	Promoter (<=1kb)	12	101673905	101685205	27340	0	ENSG00000120800	UTP20	UTP20, small subunit processome component
chr12	102091419	102091967	549	475	9.26402	51.5006	47.568	Promoter (<=1kb)	12	102091417	102123424	56994	2	ENSG00000111666	CHPT1	choline phosphotransferase 1
chr12	102224218	102224679	462	170	5.8893	20.666	17.0485	Promoter (<=1kb)	12	102139275	102224645	79158	0	ENSG00000111670	GNPTAB	N-acetylglucosamine-1-phosphate transferase alpha and beta subunits
chr12	104458131	104458677	547	1632	22.9881	167.915	163.294	Promoter (<=1kb)	12	104458236	104500304	29915	0	ENSG00000111727	HCFC2	host cell factor C2
chr12	104531458	104532086	629	223	6.92754	26.0427	22.3496	Promoter (<=1kb)	12	104510858	104532040	4801	0	ENSG00000120837	NFYB	nuclear transcription factor Y subunit beta
chr12	105379939	105380348	410	82	3.36104	11.6879	8.24832	Promoter (<=1kb)	12	105380098	105388505	121053	0	ENSG00000151131	C12orf45	chromosome 12 open reading frame 45
chr12	105501141	105501695	555	2215	21.9962	226.415	221.541	Promoter (<=1kb)	12	105501492	105562906	23325	0	ENSG00000136051	WASHC4	WASH complex subunit 4
chr12	106533176	106533417	242	135	5.1354	17.148	13.5893	Promoter (<=1kb)	12	106457125	106533811	9891	394	ENSG00000074590	NUAK1	NUAK family kinase 1
chr12	106641403	106641642	240	38	3.33324	7.12419	3.85324	Promoter (<=1kb)	12	106631659	106641713	10970	71	ENSG00000136026	CKAP4	cytoskeleton associated protein 4
chr12	108079403	108079646	244	89	3.92613	12.445	8.98466	Promoter (<=1kb)	12	108079590	108091374	11137	0	ENSG00000136045	PWP1	PWP1 homolog, endonuclein
chr12	108954747	108955345	599	822	11.4722	86.4539	82.2887	Promoter (<=1kb)	12	108915991	108955165	9733	0	ENSG00000075856	SART3	squamous cell carcinoma antigen recognized by T cells 3
chr12	108956147	108956689	543	2174	20.9743	222.262	217.405	Promoter (<=1kb)	12	108956294	108961684	23479	0	ENSG00000136003	ISCU	iron-sulfur cluster assembly enzyme
chr12	109535587	109536096	510	354	6.84139	39.2473	35.4151	Promoter (<=1kb)	12	109535923	109548798	7374	0	ENSG00000076248	UNG	uracil DNA glycosylase
chr12	109915243	109915710	468	1357	14.3884	140.265	135.785	Promoter (<=1kb)	12	109915428	109928527	89910	0	ENSG00000151148	UBE3B	ubiquitin protein ligase E3B
chr12	110433957	110434432	476	2045	33.1406	209.387	204.585	Promoter (<=1kb)	12	110367607	110434194	9815	0	ENSG00000139436	GIT2	GIT ArfGAP 2
chr12	110719527	110719918	392	312	7.46912	35.0861	31.293	Promoter (<=1kb)	12	110719032	110788897	488	495	ENSG00000174437	ATP2A2	ATPase sarcoplasmic/endoplasmic reticulum Ca2+ transporting 2
chr12	110841157	110841658	502	872	17.9755	91.4937	87.2994	Promoter (<=1kb)	12	110810705	110841535	51434	0	ENSG00000196510	ANAPC7	anaphase promoting complex subunit 7
chr12	110939977	110940290	314	285	7.10772	32.3175	28.5519	Promoter (<=1kb)	12	110940005	110969891	144715	0	ENSG00000151164	RAD9B	RAD9 checkpoint clamp component B
chr12	111020793	111021300	508	707	9.85394	74.8173	70.7234	Promoter (<=1kb)	12	110972237	111021064	160760	0	ENSG00000196850	PPTC7	PTC7 protein phosphatase homolog
chr12	111180465	111181074	610	1180	13.5385	122.419	118.043	Promoter (<=1kb)	12	111157613	111180783	5501	0	ENSG00000186298	PPP1CC	protein phosphatase 1 catalytic subunit gamma
chr12	111471895	111472325	431	131	6.48667	16.7286	13.1771	Promoter (<=1kb)	12	111471828	111788358	23316	67	ENSG00000111249	CUX2	cut like homeobox 2
chr12	112035941	112036671	731	258	6.74631	29.6143	25.878	Promoter (<=1kb)	12	111950277	112036294	6311	0	ENSG00000204842	ATXN2	ataxin 2
chr12	112451198	112451439	242	81	3.29458	11.6108	8.17291	Promoter (<=1kb)	12	112451152	112461024	10961	46	ENSG00000089248	ERP29	endoplasmic reticulum protein 29
chr12	112546353	112546658	306	95	3.26888	13.0056	9.53341	Promoter (<=1kb)	12	112464493	112546635	80018	0	ENSG00000111300	NAA25	N(alpha)-acetyltransferase 25, NatB auxiliary subunit
chr12	112819832	112820437	606	793	14.0743	83.5085	79.3615	Promoter (<=1kb)	12	112597992	112819896	283450	0	ENSG00000173064	HECTD4	HECT domain E3 ubiquitin protein ligase 4
chr12	112856510	112856754	245	94	3.60008	12.9717	9.49994	Promoter (<=1kb)	12	112856536	112924727	5781	0	ENSG00000179295	PTPN11	protein tyrosine phosphatase, non-receptor type 11
chr12	113154358	113154658	301	110	7.42685	14.5122	11.0046	Intron (uc010syl.2/22895, intron 1 of 21)	12	113229549	113336684	22895	-74891	ENSG00000089169	RPH3A	rabphilin 3A
chr12	113622995	113623477	483	886	12.4178	92.8078	88.6062	Promoter (<=1kb)	12	113594978	113623284	79039	0	ENSG00000123064	DDX54	DEAD-box helicase 54
chr12	113903066	113903340	275	89	4.00774	12.4554	8.99484	Intron (uc001tvj.1/64211, intron 4 of 4)	12	113900694	113909877	64211	6537	ENSG00000089116	LHX5	LIM homeobox 5
chr12	114403989	114404363	375	300	5.38561	33.8425	30.0615	Promoter (<=1kb)	12	114254543	114404176	9904	0	ENSG00000122965	RBM19	RNA binding motif protein 19
chr12	116715230	116715760	531	2043	25.5839	209.144	204.343	Promoter (<=1kb)	12	116396381	116714991	23389	-239	ENSG00000123066	MED13L	mediator complex subunit 13 like
chr12	117175627	117175893	267	63	3.76133	9.77682	6.39509	Promoter (<=1kb)	12	117153596	117175843	79794	0	ENSG00000111412	C12orf49	chromosome 12 open reading frame 49
chr12	117257155	117257622	468	2669	32.6013	271.974	266.945	Intron (uc001twa.4/84900, intron 8 of 11)	12	117197769	117291436	84900	59386	ENSG00000135119	RNFT2	ring finger protein, transmembrane 2
chr12	117627949	117628516	568	2926	36.8801	297.716	292.606	Promoter (<=1kb)	12	117581585	117628300	23014	0	ENSG00000135108	FBXO21	F-box protein 21
chr12	118541367	118541595	229	49	3.27224	8.25967	4.93681	Promoter (<=1kb)	12	118501398	118541810	54621	215	ENSG00000176834	VSIG10	V-set and immunoglobulin domain containing 10
chr12	120356088	120356323	236	49	3.77645	8.26565	4.94255	Distal Intergenic	12	120123595	120315095	11113	-40993	ENSG00000122966	CIT	citron rho-interacting serine/threonine kinase
chr12	120632251	120632669	419	458	9.27617	49.8103	45.8903	Promoter (<=1kb)	12	120565014	120632513	10985	0	ENSG00000089154	GCN1	GCN1, eIF2 alpha kinase activator homolog
chr12	120639269	120639496	228	117	3.83002	15.2792	11.7566	Promoter (<=1kb)	12	120639094	120650631	100506649	175	ENSG00000255857	PXN-AS1	PXN antisense RNA 1
chr12	120799341	120799678	338	284	7.36507	32.2502	28.4856	Intron (uc001tye.2/4440, intron 6 of 14)	12	120779133	120806983	4440	7305	ENSG00000135097	MSI1	musashi RNA binding protein 1
chr12	120806571	120806974	404	402	8.81455	44.147	40.2731	Promoter (<=1kb)	12	120779133	120806983	4440	9	ENSG00000135097	MSI1	musashi RNA binding protein 1
chr12	120875814	120876259	446	309	6.54199	34.7045	30.9149	Promoter (<=1kb)	12	120875893	120878545	1337	0	ENSG00000111775	COX6A1	cytochrome c oxidase subunit 6A1
chr12	120966701	120967174	474	1764	20.2673	181.131	176.449	Promoter (<=1kb)	12	120941082	120966964	84274	0	ENSG00000110871	COQ5	coenzyme Q5, methyltransferase
chr12	120972523	120972789	267	24	2.45257	5.59653	2.42409	Promoter (<=1kb)	12	120972132	121015397	9921	391	ENSG00000022840	RNF10	ring finger protein 10
chr12	121124967	121125315	349	100	4.34338	13.5863	10.0992	Promoter (<=1kb)	12	121124949	121139667	9761	18	ENSG00000110917	MLEC	malectin
chr12	121148021	121149057	1037	2223	25.901	227.197	222.319	Promoter (<=1kb)	12	121148238	121161443	84747	0	ENSG00000175970	UNC119B	unc-119 lipid binding chaperone B
chr12	121341448	121342267	820	1075	18.3119	111.872	107.559	Promoter (<=1kb)	12	121200313	121342155	121665	0	ENSG00000157837	SPPL3	signal peptide peptidase like 3
chr12	121453988	121454486	499	1490	13.7445	153.621	149.071	Promoter (<=1kb)	12	121440848	121454300	64897	0	ENSG00000157895	C12orf43	chromosome 12 open reading frame 43
chr12	121647780	121648148	369	304	7.10505	34.2212	30.4365	Promoter (<=1kb)	12	121647664	121671909	5025	116	ENSG00000135124	P2RX4	purinergic receptor P2X 4
chr12	122238395	122239148	754	458	9.27617	49.8103	45.8903	Promoter (1-2kb)	12	122237078	122240852	338799	1704	ENSG00000212694	LINC01089	long intergenic non-protein coding RNA 1089
chr12	122240756	122241175	420	108	4.79084	14.3418	10.8385	Promoter (<=1kb)	12	122237078	122240852	338799	0	ENSG00000212694	LINC01089	long intergenic non-protein coding RNA 1089
chr12	122460402	122460852	451	66	3.9262	9.99286	6.60499	Promoter (<=1kb)	12	122459861	122499950	605	541	ENSG00000110987	BCL7A	BCL tumor suppressor 7A
chr12	122710347	122710761	415	663	9.34067	70.4299	66.3644	Promoter (1-2kb)	12	122692209	122712068	56616	1307	ENSG00000184047	DIABLO	diablo IAP-binding mitochondrial protein
chr12	122750721	122751117	397	472	8.2486	51.1709	47.2409	Promoter (<=1kb)	12	122692209	122751068	65082	0	ENSG00000139719	VPS33A	VPS33A, CORVET/HOPS core subunit
chr12	122906785	122907046	262	19	2.50359	5.07427	1.93501	Promoter (<=1kb)	12	122755981	122907116	6249	70	ENSG00000130779	CLIP1	CAP-Gly domain containing linker protein 1
chr12	122985006	122985584	579	218	4.55079	25.5004	21.8152	Promoter (<=1kb)	12	122956146	122985543	55596	0	ENSG00000033030	ZCCHC8	zinc finger CCHC-type containing 8
chr12	123011098	123011568	471	496	12.7787	53.6232	49.6748	Promoter (<=1kb)	12	122989190	123011560	65117	0	ENSG00000111011	RSRC2	arginine and serine rich coiled-coil 2
chr12	123380458	123380747	290	125	5.68625	16.0732	12.5353	Promoter (<=1kb)	12	123349875	123380712	79720	0	ENSG00000139722	VPS37B	VPS37B, ESCRT-I subunit
chr12	123752506	123752810	305	149	4.22084	18.512	14.9293	Promoter (<=1kb)	12	123745517	123752801	8099	0	ENSG00000111328	CDK2AP1	cyclin dependent kinase 2 associated protein 1
chr12	123754126	123754529	404	500	7.84823	53.9769	50.0257	Promoter (<=1kb)	12	123745517	123754781	8099	252	ENSG00000111328	CDK2AP1	cyclin dependent kinase 2 associated protein 1
chr12	123755796	123756676	881	226	6.09004	26.3396	22.6428	Promoter (<=1kb)	12	123745517	123756687	8099	11	ENSG00000111328	CDK2AP1	cyclin dependent kinase 2 associated protein 1
chr12	123849014	123849582	569	1933	21.0366	198.061	193.308	Promoter (<=1kb)	12	123805246	123849388	55206	0	ENSG00000139697	SBNO1	strawberry notch homolog 1
chr12	123873255	123873531	277	52	4.00523	8.55318	5.21496	Intron (uc001uew.3/387893, intron 1 of 7)	12	123868704	123893900	387893	4551	ENSG00000183955	KMT5A	lysine methyltransferase 5A
chr12	123873913	123874272	360	42	3.00431	7.57307	4.27658	Exon (uc001uew.3/387893, exon 2 of 8)	12	123868704	123893900	387893	5209	ENSG00000183955	KMT5A	lysine methyltransferase 5A
chr12	123942622	123943067	446	1005	12.6026	104.829	100.557	Promoter (<=1kb)	12	123942651	123943940	11066	0	ENSG00000184209	SNRNP35	small nuclear ribonucleoprotein U11/U12 subunit 35
chr12	124155452	124155932	481	3105	25.1797	315.675	310.516	Promoter (<=1kb)	12	124155660	124192950	79867	0	ENSG00000168778	TCTN2	tectonic family member 2
chr12	124458105	124458596	492	137	4.66891	17.2707	13.7097	Promoter (<=1kb)	12	124457762	124499986	144348	343	ENSG00000179195	ZNF664	zinc finger protein 664
chr12	125348399	125348744	346	638	10.334	67.8635	63.8151	Promoter (<=1kb)	12	125262174	125348519	949	0	ENSG00000073060	SCARB1	scavenger receptor class B member 1
chr12	125398754	125399175	422	494	9.01948	53.3943	49.447	Promoter (<=1kb)	12	125398127	125398665	7316	-89	ENSG00000150991	UBC	ubiquitin C
chr12	131323684	131323911	228	63	4.12921	9.70098	6.32187	Promoter (<=1kb)	12	131274145	131323819	2054	0	ENSG00000111450	STX2	syntaxin 2
chr12	131356449	131357318	870	553	11.2851	59.3555	55.3653	Promoter (<=1kb)	12	131356617	131360826	5901	0	ENSG00000132341	RAN	RAN, member RAS oncogene family
chr12	132195392	132195894	503	1346	14.7381	139.088	134.614	Promoter (<=1kb)	12	132195632	132239044	6433	0	ENSG00000061936	SFSWAP	splicing factor SWAP
chr12	132628679	132629073	395	306	6.79608	34.4128	30.6256	Promoter (<=1kb)	12	132621140	132628880	317781	0	ENSG00000185163	DDX51	DEAD-box helicase 51
chr12	133464074	133464601	528	5177	28.4615	523.359	517.775	Promoter (<=1kb)	12	133416938	133464204	55743	0	ENSG00000072609	CHFR	checkpoint with forkhead and ring finger domains
chr12	133757894	133758220	327	196	5.21463	23.2758	19.62	Promoter (<=1kb)	12	133757995	133780885	10795	0	ENSG00000090612	ZNF268	zinc finger protein 268
chr13	20356647	20357322	676	1102	16.0464	114.583	110.253	Promoter (<=1kb)	13	20277009	20357159	55269	0	ENSG00000121390	PSPC1	paraspeckle component 1
chr13	20437022	20437258	237	122	5.04797	15.8026	12.2693	Promoter (<=1kb)	13	20397624	20437776	9205	518	ENSG00000132950	ZMYM5	zinc finger MYM-type containing 5
chr13	20438475	20438943	469	16	2.54761	4.77321	1.67839	Promoter (<=1kb)	13	20411593	20437776	9205	-699	ENSG00000132950	ZMYM5	zinc finger MYM-type containing 5
chr13	20533379	20533792	414	656	9.42551	69.6911	65.6302	Promoter (<=1kb)	13	20533999	20577275	7750	-207	ENSG00000121741	ZMYM2	zinc finger MYM-type containing 2
chr13	21099826	21100102	277	127	5.10537	16.3338	12.7902	Promoter (<=1kb)	13	20977806	21100012	51084	0	ENSG00000165475	CRYL1	crystallin lambda 1
chr13	21476639	21477177	539	1319	16.6595	136.397	131.939	Promoter (<=1kb)	13	21351468	21476913	64328	0	ENSG00000132953	XPO4	exportin 4
chr13	21714523	21714828	306	163	4.68095	19.9609	16.3546	Promoter (<=1kb)	13	21714653	21723224	10284	0	ENSG00000150459	SAP18	Sin3A associated protein 18
chr13	22033146	22033719	574	72	3.72358	10.6868	7.27575	Promoter (<=1kb)	13	21946710	22033508	253832	0	ENSG00000180776	ZDHHC20	zinc finger DHHC-type containing 20
chr13	22178029	22178528	500	2824	30.7198	287.523	282.443	Promoter (<=1kb)	13	22066828	22178355	221154	0	ENSG00000165487	MICU2	mitochondrial calcium uptake 2
chr13	23489471	23490128	658	747	16.651	78.8862	74.7673	Distal Intergenic	13	23471169	23472320	646201	-17151	NA	BASP1P1	brain abundant, membrane attached signal protein 1 pseudogene 1
chr13	25496794	25497199	406	72	3.72358	10.6868	7.27575	Promoter (<=1kb)	13	25456412	25497027	55835	0	ENSG00000151849	CENPJ	centromere protein J
chr13	25739299	25739518	220	42	4.82745	7.50176	4.20799	Distal Intergenic	13	25742672	25745857	219287	6339	ENSG00000165566	AMER2	APC membrane recruitment protein 2
chr13	26827931	26828137	207	39	3.64111	7.18379	3.91013	Promoter (<=1kb)	13	26828756	26978569	1024	-619	ENSG00000132964	CDK8	cyclin dependent kinase 8
chr13	27745081	27745328	248	47	4.05579	8.11387	4.79657	Promoter (<=1kb)	13	27640287	27746033	219333	705	ENSG00000152484	USP12	ubiquitin specific peptidase 12
chr13	27745641	27746250	610	159	7.1577	19.586	15.9852	Promoter (<=1kb)	13	27640287	27746033	219333	0	ENSG00000152484	USP12	ubiquitin specific peptidase 12
chr13	27825559	27825998	440	256	7.5574	29.4001	25.6666	Promoter (<=1kb)	13	27825692	27830471	6144	0	ENSG00000122026	RPL21	ribosomal protein L21
chr13	30169004	30169596	593	292	6.35237	32.9909	29.2187	Promoter (<=1kb)	13	30083551	30169825	6541	229	ENSG00000139514	SLC7A1	solute carrier family 7 member 1
chr13	30237846	30238067	222	13	3.15125	4.41554	1.34837	Distal Intergenic	13	30083551	30169825	6541	-68021	ENSG00000139514	SLC7A1	solute carrier family 7 member 1
chr13	30424428	30424947	520	768	10.9981	80.9741	76.842	Promoter (<=1kb)	13	30338545	30424820	5412	0	ENSG00000122042	UBL3	ubiquitin like 3
chr13	30688817	30689245	429	203	8.23871	23.9997	20.3334	Distal Intergenic	13	30510668	30524625	440131	178149	NA	LINC00544	long intergenic non-protein coding RNA 544
chr13	31038548	31039350	803	1656	22.0952	170.311	165.678	Promoter (<=1kb)	13	31032879	31038384	3146	-164	ENSG00000189403	HMGB1	high mobility group box 1
chr13	31191720	31191994	275	77	4.45955	11.1472	7.72421	Promoter (<=1kb)	13	31191830	31226094	10208	0	ENSG00000132952	USPL1	ubiquitin specific peptidase like 1
chr13	31248311	31248665	355	352	10.0131	39.1301	35.2987	Distal Intergenic	13	31287615	31338565	241	-38950	ENSG00000132965	ALOX5AP	arachidonate 5-lipoxygenase activating protein
chr13	31773940	31774314	375	91	4.78988	12.6556	9.19056	Promoter (<=1kb)	13	31774112	31906411	145173	0	ENSG00000187676	B3GLCT	beta 3-glucosyltransferase
chr13	32738851	32739068	218	89	6.68417	12.3857	8.92713	Intron (uc001utx.3/10129, intron 17 of 60)	13	32835753	32870776	10129	-96685	ENSG00000073910	FRY	FRY microtubule binding protein
chr13	33112844	33113056	213	90	5.49247	12.5317	9.06953	Promoter (<=1kb)	13	33006930	33112936	10443	0	ENSG00000244754	N4BP2L2	NEDD4 binding protein 2 like 2
chr13	33160303	33160925	623	1109	11.9803	115.308	110.974	Promoter (<=1kb)	13	33160564	33226715	23047	0	ENSG00000083642	PDS5B	PDS5 cohesin associated factor B
chr13	34116552	34116792	241	67	4.081	10.1451	6.75212	Intron (uc001uux.3/90627, intron 3 of 17)	13	33677272	34250932	90627	134140	ENSG00000133121	STARD13	StAR related lipid transfer domain containing 13
chr13	35516280	35516922	643	547	10.7246	58.7119	54.7269	Promoter (<=1kb)	13	35516424	36246874	26960	0	ENSG00000172915	NBEA	neurobeachin
chr13	37573280	37573679	400	332	8.3593	37.1075	33.294	Promoter (<=1kb)	13	37523908	37573504	29880	0	ENSG00000120697	ALG5	ALG5, dolichyl-phosphate beta-glucosyltransferase
chr13	37574727	37575118	392	798	16.7491	83.9927	79.8426	Promoter (<=1kb)	13	37574678	37583751	11340	49	ENSG00000120699	EXOSC8	exosome component 8
chr13	40229734	40229953	220	43	3.1594	7.6877	4.38643	Promoter (<=1kb)	13	40229764	40326765	57511	0	ENSG00000133103	COG6	component of oligomeric golgi complex 6
chr13	41495767	41496110	344	103	4.83674	13.797	10.3054	Promoter (<=1kb)	13	41371121	41495910	100616668	0	NA	TPTE2P5	transmembrane phosphoinositide 3-phosphatase and tensin homolog 2 pseudogene 5
chr13	41885164	41885649	486	500	13.1813	53.9527	50.0022	Promoter (<=1kb)	13	41885341	41932854	79612	0	ENSG00000172766	NAA16	N(alpha)-acetyltransferase 16, NatA auxiliary subunit
chr13	42622652	42623009	358	240	9.71635	27.7342	24.0193	Promoter (<=1kb)	13	42622843	42803891	160851	0	ENSG00000102780	DGKH	diacylglycerol kinase eta
chr13	45151406	45151736	331	125	4.00587	16.0798	12.541	Promoter (<=1kb)	13	45006279	45150701	8848	-705	ENSG00000102804	TSC22D1	TSC22 domain family member 1
chr13	45914788	45915108	321	148	4.70676	18.4087	14.8272	Promoter (<=1kb)	13	45911304	45915297	7178	189	ENSG00000133112	TPT1	tumor protein, translationally-controlled 1
chr13	47127313	47127736	424	173	4.93019	21.0134	17.3903	Promoter (<=1kb)	13	47127296	47327175	23143	17	ENSG00000136141	LRCH1	leucine rich repeats and calponin homology domain containing 1
chr13	47371049	47371539	491	2242	24.9367	229.184	224.297	Promoter (<=1kb)	13	47345391	47371367	2098	0	ENSG00000139684	ESD	esterase D
chr13	48575146	48575607	462	1358	14.8238	140.298	135.818	Promoter (<=1kb)	13	48516791	48575462	8803	0	ENSG00000136143	SUCLA2	succinate-CoA ligase ADP-forming beta subunit
chr13	48669012	48669416	405	403	9.33455	44.2185	40.3437	Promoter (<=1kb)	13	48649864	48669277	29079	0	ENSG00000136146	MED4	mediator complex subunit 4
chr13	49549835	49550290	456	440	17.0818	47.9425	44.0376	Promoter (<=1kb)	13	49550048	49720983	22862	0	ENSG00000102531	FNDC3A	fibronectin type III domain containing 3A
chr13	50017979	50018368	390	148	5.29768	18.4026	14.8216	Promoter (<=1kb)	13	49882786	50018221	81617	0	ENSG00000102547	CAB39L	calcium binding protein 39 like
chr13	50571118	50571446	329	145	8.41797	18.1453	14.5682	Promoter (<=1kb)	13	50571143	50592603	10206	0	ENSG00000204977	TRIM13	tripartite motif containing 13
chr13	51484026	51484339	314	131	5.93007	16.6891	13.1393	Promoter (<=1kb)	13	51483814	51544596	79621	212	ENSG00000136104	RNASEH2B	ribonuclease H2 subunit B
chr13	52025631	52026027	397	664	20.3301	70.4984	66.4326	Promoter (1-2kb)	13	51935701	52027275	26512	1248	ENSG00000102786	INTS6	integrator complex subunit 6
chr13	52158666	52158889	224	56	3.96404	9.00262	5.64892	Promoter (<=1kb)	13	52158484	52336171	115825	182	ENSG00000139668	WDFY2	WD repeat and FYVE domain containing 2
chr13	53024538	53024961	424	288	10.0695	32.6407	28.8718	Promoter (<=1kb)	13	52986737	53024763	51028	0	ENSG00000136100	VPS36	vacuolar protein sorting 36 homolog
chr13	53174085	53174604	520	66	4.36934	9.99819	6.6097	Distal Intergenic	13	53191605	53203917	144983	-17001	ENSG00000139675	HNRNPA1L2	heterogeneous nuclear ribonucleoprotein A1-like 2
chr13	53226577	53226842	266	19	2.87181	5.1447	1.9976	Promoter (<=1kb)	13	53226831	53262433	10910	0	ENSG00000165416	SUGT1	SGT1 homolog, MIS12 kinetochore complex assembly cochaperone
chr13	63621475	63621979	505	50	5.1988	8.42311	5.09023	Distal Intergenic	13	64311568	64316701	283491	-689589	NA	OR7E156P	olfactory receptor family 7 subfamily E member 156 pseudogene
chr13	63630276	63631417	1142	50	5.1988	8.42311	5.09023	Distal Intergenic	13	64311568	64316701	283491	-680151	NA	OR7E156P	olfactory receptor family 7 subfamily E member 156 pseudogene
chr13	63643864	63644122	259	33	4.45611	6.61197	3.36306	Distal Intergenic	13	64311568	64316701	283491	-667446	NA	OR7E156P	olfactory receptor family 7 subfamily E member 156 pseudogene
chr13	63648417	63648797	381	25	4.08477	5.75617	2.55965	Distal Intergenic	13	64311568	64316701	283491	-662771	NA	OR7E156P	olfactory receptor family 7 subfamily E member 156 pseudogene
chr13	73301625	73301934	310	79	3.51071	11.3911	7.95897	Promoter (<=1kb)	13	73282495	73301938	440145	4	ENSG00000204899	MZT1	mitotic spindle organizing protein 1
chr13	74340155	74340384	230	44	4.62049	7.75471	4.45106	Intron (uc001vjf.3/11278, intron 5 of 7)	13	74260149	74708066	11278	367682	ENSG00000118922	KLF12	Kruppel like factor 12
chr13	74708381	74708633	253	62	3.61948	9.59472	6.21851	Promoter (<=1kb)	13	74260149	74708394	11278	0	ENSG00000118922	KLF12	Kruppel like factor 12
chr13	76123798	76124110	313	180	5.81453	21.6486	18.0168	Promoter (<=1kb)	13	76123886	76180156	7347	0	ENSG00000118939	UCHL3	ubiquitin C-terminal hydrolase L3
chr13	77601047	77601519	473	1131	14.0321	117.503	113.157	Promoter (<=1kb)	13	77579389	77601331	26224	0	ENSG00000005812	FBXL3	F-box and leucine rich repeat protein 3
chr13	77731247	77731455	209	42	4.82745	7.50176	4.20799	Intron (uc010aev.3/23077, intron 45 of 82)	13	77671505	77700677	23077	-30570	ENSG00000005810	MYCBP2	MYC binding protein 2, E3 ubiquitin protein ligase
chr13	77903869	77904214	346	226	6.09313	26.351	22.6539	Promoter (2-3kb)	13	77618792	77901177	23077	-2692	ENSG00000005810	MYCBP2	MYC binding protein 2, E3 ubiquitin protein ligase
chr13	78271776	78272168	393	60	3.89874	9.37545	6.0064	Promoter (<=1kb)	13	78271989	78338377	122060	0	ENSG00000139737	SLAIN1	SLAIN motif family member 1
chr13	80915385	80915660	276	18	2.17925	4.99302	1.85939	Promoter (<=1kb)	13	80910112	80915086	10253	-299	ENSG00000136158	SPRY2	sprouty RTK signaling antagonist 2
chr13	92000777	92001473	697	1326	19.923	137.162	132.7	Promoter (<=1kb)	13	92000074	92006829	407975	703	ENSG00000215417	MIR17HG	miR-17-92a-1 cluster host gene
chr13	95202043	95202334	292	162	5.19044	19.8804	16.2755	Distal Intergenic	13	95226308	95248511	23483	46177	ENSG00000088451	TGDS	TDP-glucose 4,6-dehydratase
chr13	95619947	95620164	218	28	2.82089	6.06274	2.84981	Distal Intergenic	13	95672083	95715113	10257	94949	ENSG00000125257	ABCC4	ATP binding cassette subfamily C member 4
chr13	96296109	96296441	333	140	4.85194	17.6017	14.0355	Promoter (<=1kb)	13	96230456	96296960	22873	519	ENSG00000134874	DZIP1	DAZ interacting zinc finger protein 1
chr13	96705637	96705867	231	74	4.75327	10.8984	7.48138	Promoter (<=1kb)	13	96453836	96705736	55757	0	ENSG00000102595	UGGT2	UDP-glucose glycoprotein glucosyltransferase 2
chr13	98628669	98629363	695	883	12.8395	92.5476	88.3473	Promoter (<=1kb)	13	98628886	98664596	3843	0	ENSG00000065150	IPO5	importin 5
chr13	98795294	98795692	399	195	6.15084	23.1617	19.5071	Promoter (<=1kb)	13	98795434	98897558	10160	0	ENSG00000152767	FARP1	FERM, ARH/RhoGEF and pleckstrin domain protein 1
chr13	100258768	100259216	449	797	13.5672	83.9282	79.7787	Promoter (<=1kb)	13	100258919	100518661	171425	0	ENSG00000125246	CLYBL	citrate lyase beta like
chr13	100741223	100741564	342	305	7.27711	34.3836	30.5966	Promoter (<=1kb)	13	100741269	101182691	5095	0	ENSG00000175198	PCCA	propionyl-CoA carboxylase alpha subunit
chr13	101326419	101326640	222	60	3.92985	9.45922	6.08689	Promoter (<=1kb)	13	101256090	101327103	84899	463	ENSG00000125247	TMTC4	transmembrane and tetratricopeptide repeat containing 4
chr13	103249322	103249555	234	46	2.81389	7.94878	4.63813	Promoter (<=1kb)	13	103249286	103331523	7174	36	ENSG00000134900	TPP2	tripeptidyl peptidase 2
chr13	103498148	103498412	265	152	4.64576	18.8248	15.237	Promoter (<=1kb)	13	103498191	103518503	2073	0	ENSG00000134899	ERCC5	ERCC excision repair 5, endonuclease
chr13	107186433	107186652	220	25	3.29148	5.7143	2.53453	Promoter (<=1kb)	13	107142079	107187388	1948	736	ENSG00000125266	EFNB2	ephrin B2
chr13	107219758	107219970	213	38	3.04656	7.13054	3.85857	Promoter (<=1kb)	13	107195662	107220514	55082	544	ENSG00000134884	ARGLU1	arginine and glutamate rich 1
chr13	107220227	107220719	493	770	11.7784	81.138	77.0052	Promoter (<=1kb)	13	107195662	107220514	55082	0	ENSG00000134884	ARGLU1	arginine and glutamate rich 1
chr13	110439189	110439555	367	71	3.60779	10.5426	7.13577	Promoter (<=1kb)	13	110406184	110438914	8660	-275	ENSG00000185950	IRS2	insulin receptor substrate 2
chr13	111358310	111358565	256	76	4.00556	11.0531	7.63236	Promoter (<=1kb)	13	111293757	111358480	79587	0	ENSG00000134905	CARS2	cysteinyl-tRNA synthetase 2, mitochondrial
chr13	111566769	111567234	466	416	9.21739	45.558	41.6719	Promoter (<=1kb)	13	111530887	111567416	55608	182	ENSG00000088448	ANKRD10	ankyrin repeat domain 10
chr13	111767940	111768342	403	95	5.22765	13.0471	9.57396	Promoter (<=1kb)	13	111767624	111947542	8874	316	ENSG00000102606	ARHGEF7	Rho guanine nucleotide exchange factor 7
chr13	111806336	111806551	216	29	3.06508	6.20203	2.98177	Promoter (<=1kb)	13	111806061	111958081	8874	275	ENSG00000102606	ARHGEF7	Rho guanine nucleotide exchange factor 7
chr13	112721054	112721294	241	151	4.88113	18.7398	15.1538	Promoter (<=1kb)	13	112721913	112726020	6656	-619	ENSG00000182968	SOX1	SRY-box 1
chr13	112722451	112722767	317	182	6.60674	21.9029	18.2669	Promoter (<=1kb)	13	112721913	112726020	6656	538	ENSG00000182968	SOX1	SRY-box 1
chr13	113242089	113242700	612	1650	23.7674	169.641	165.012	Promoter (<=1kb)	13	113139328	113242481	10426	0	ENSG00000126216	TUBGCP3	tubulin gamma complex associated protein 3
chr13	113863861	113864111	251	159	5.53043	19.5344	15.9346	Promoter (<=1kb)	13	113863931	113919392	8451	0	ENSG00000139842	CUL4A	cullin 4A
chr13	113951632	113951964	333	204	6.45018	24.1146	20.4469	Promoter (<=1kb)	13	113951469	113977741	3916	163	ENSG00000185896	LAMP1	lysosomal associated membrane protein 1
chr13	114566750	114567093	344	93	5.11312	12.774	9.30648	Promoter (<=1kb)	13	114523522	114567046	2621	0	ENSG00000183087	GAS6	growth arrest specific 6
chr13	114897818	114898089	272	38	2.97112	7.08132	3.81146	Promoter (<=1kb)	13	114747194	114898095	22821	6	ENSG00000185989	RASA3	RAS p21 protein activator 3
chr13	115079844	115080153	310	120	5.64373	15.5728	12.0446	Promoter (<=1kb)	13	115079965	115092803	283489	0	ENSG00000198824	CHAMP1	chromosome alignment maintaining phosphoprotein 1
chr14	19010457	19010675	219	52	4.92852	8.61138	5.27111	Distal Intergenic	14	19377594	19378574	440153	-366919	ENSG00000257115	OR11H12	olfactory receptor family 11 subfamily H member 12
chr14	19023618	19023874	257	60	5.57014	9.37392	6.00505	Distal Intergenic	14	19377594	19378574	440153	-353720	ENSG00000257115	OR11H12	olfactory receptor family 11 subfamily H member 12
chr14	19026225	19026492	268	36	4.31245	6.92551	3.66431	Distal Intergenic	14	19377594	19378574	440153	-351102	ENSG00000257115	OR11H12	olfactory receptor family 11 subfamily H member 12
chr14	19028266	19028908	643	146	7.41414	18.2282	14.6501	Distal Intergenic	14	19377594	19378574	440153	-348686	ENSG00000257115	OR11H12	olfactory receptor family 11 subfamily H member 12
chr14	19036965	19037316	352	32	4.3502	6.43997	3.21106	Distal Intergenic	14	19377594	19378574	440153	-340278	ENSG00000257115	OR11H12	olfactory receptor family 11 subfamily H member 12
chr14	19045216	19045827	612	45	4.69026	7.87682	4.56883	Distal Intergenic	14	19377594	19378574	440153	-331767	ENSG00000257115	OR11H12	olfactory receptor family 11 subfamily H member 12
chr14	20811378	20811988	611	655	10.3148	69.6434	65.5831	Promoter (<=1kb)	14	20811773	20826062	10038	0	ENSG00000129484	PARP2	poly(ADP-ribose) polymerase 2
chr14	21457943	21458219	277	35	3.2044	6.77922	3.52302	Promoter (<=1kb)	14	21457965	21461275	64745	0	ENSG00000165792	METTL17	methyltransferase like 17
chr14	21776971	21777238	268	109	6.90403	14.4825	10.9768	Intron (uc001wag.3/57096, intron 6 of 23)	14	21785713	21819460	57096	-8475	ENSG00000092200	RPGRIP1	RPGR interacting protein 1
chr14	21979455	21979781	327	450	7.56855	49.0067	45.0936	Promoter (<=1kb)	14	21966282	21979457	56339	0	ENSG00000165819	METTL3	methyltransferase like 3
chr14	23067102	23067475	374	15	2.48239	4.58587	1.50734	Promoter (<=1kb)	14	23067147	23073161	63874	0	ENSG00000100439	ABHD4	abhydrolase domain containing 4
chr14	23235706	23236181	476	472	9.82009	51.1881	47.2577	Promoter (<=1kb)	14	23235731	23237831	5018	0	ENSG00000155463	OXA1L	OXA1L, mitochondrial inner membrane protein
chr14	23298881	23299306	426	489	10.1391	52.9113	48.9687	Promoter (<=1kb)	14	23299092	23304246	122704	0	ENSG00000172590	MRPL52	mitochondrial ribosomal protein L52
chr14	23388195	23388451	257	92	4.45829	12.7074	9.2411	Promoter (<=1kb)	14	23369854	23388396	55147	0	ENSG00000100461	RBM23	RNA binding motif protein 23
chr14	23398323	23398752	430	596	8.91139	63.6694	59.6492	Promoter (<=1kb)	14	23389733	23398661	10419	0	ENSG00000100462	PRMT5	protein arginine methyltransferase 5
chr14	23476331	23476628	298	85	4.42184	11.9788	8.53192	Promoter (2-3kb)	14	23456110	23479360	60686	2732	ENSG00000100802	C14orf93	chromosome 14 open reading frame 93
chr14	23503886	23504588	703	420	9.17403	45.9825	42.0926	Promoter (<=1kb)	14	23495060	23504354	5693	0	ENSG00000100804	PSMB5	proteasome subunit beta 5
chr14	23564078	23564453	376	428	7.03473	46.7853	42.8889	Promoter (<=1kb)	14	23564683	23569665	55017	-230	ENSG00000179933	C14orf119	chromosome 14 open reading frame 119
chr14	23790504	23791258	755	1543	24.9386	158.909	154.333	Promoter (1-2kb)	14	23789397	23795394	8106	1107	ENSG00000100836	PABPN1	poly(A) binding protein nuclear 1
chr14	23938328	23938586	259	137	5.29422	17.2757	13.7142	Promoter (<=1kb)	14	23938898	23947402	25983	-312	ENSG00000129460	NGDN	neuroguidin
chr14	24025195	24025600	406	509	7.73821	54.9443	50.986	Promoter (<=1kb)	14	24025198	24028790	79178	0	ENSG00000259431	THTPA	thiamine triphosphatase
chr14	24521050	24521405	356	53	3.55528	8.66796	5.32604	Promoter (<=1kb)	14	24521206	24538937	90668	0	ENSG00000186648	CARMIL3	capping protein regulator and myosin 1 linker 3
chr14	24685100	24685357	258	114	5.39759	14.9472	11.4312	Promoter (<=1kb)	14	24681945	24685276	145553	0	ENSG00000213920	MDP1	magnesium dependent phosphatase 1
chr14	27066140	27066712	573	200	7.28223	23.7118	20.0499	Promoter (<=1kb)	14	26915089	27066960	4857	248	ENSG00000139910	NOVA1	NOVA alternative splicing regulator 1
chr14	30396849	30397082	234	145	4.89834	18.1126	14.536	Promoter (<=1kb)	14	30045687	30396899	5587	0	ENSG00000184304	PRKD1	protein kinase D1
chr14	31091274	31091799	526	2271	25.1624	232.087	227.189	Promoter (<=1kb)	14	31091460	31185183	23256	0	ENSG00000092108	SCFD1	sec1 family domain containing 1
chr14	31494681	31495774	1094	1180	14.9214	122.377	118.002	Promoter (<=1kb)	14	31363005	31495607	29966	0	ENSG00000196792	STRN3	striatin 3
chr14	32545975	32546583	609	389	8.43288	42.766	38.9034	Promoter (<=1kb)	14	32546189	32628934	394	0	ENSG00000100852	ARHGAP5	Rho GTPase activating protein 5
chr14	33408348	33408757	410	67	4.081	10.1451	6.75212	Promoter (<=1kb)	14	33408459	34273382	64067	0	ENSG00000151322	NPAS3	neuronal PAS domain protein 3
chr14	34931308	34931642	335	161	6.31508	19.7876	16.1846	Promoter (<=1kb)	14	34902144	34931468	171546	0	ENSG00000165389	SPTSSA	serine palmitoyltransferase small subunit A
chr14	35008902	35009192	291	69	2.9484	10.3597	6.95894	Promoter (<=1kb)	14	34985135	35008943	55837	0	ENSG00000129518	EAPP	E2F associated phosphoprotein
chr14	35099081	35099526	446	645	11.3039	68.5946	64.5405	Promoter (<=1kb)	14	35030618	35099315	58533	0	ENSG00000129515	SNX6	sorting nexin 6
chr14	35183363	35184040	678	621	12.121	66.1736	62.1364	Promoter (<=1kb)	14	35179588	35183761	1073	0	ENSG00000165410	CFL2	cofilin 2
chr14	35591607	35591844	238	125	4.62626	16.1317	12.5915	Promoter (<=1kb)	14	35554678	35591679	55012	0	ENSG00000092020	PPP2R3C	protein phosphatase 2 regulatory subunit B''gamma
chr14	35873728	35873976	249	111	4.40059	14.703	11.1911	Promoter (<=1kb)	14	35870716	35873960	4792	0	ENSG00000100906	NFKBIA	NFKB inhibitor alpha
chr14	36004317	36004661	345	77	4.13949	11.1692	7.74468	Promoter (1-2kb)	14	36003248	36006260	84684	1069	ENSG00000168348	INSM2	INSM transcriptional repressor 2
chr14	36278120	36278443	324	297	6.08374	33.4933	29.7152	Promoter (<=1kb)	14	36007558	36278432	253959	0	ENSG00000174373	RALGAPA1	Ral GTPase activating protein catalytic alpha subunit 1
chr14	39572276	39572587	312	309	6.54199	34.7045	30.9149	Promoter (<=1kb)	14	39501123	39572437	10484	0	ENSG00000100934	SEC23A	Sec23 homolog A, coat complex II component
chr14	39644293	39644501	209	86	3.30534	12.0988	8.64924	Promoter (<=1kb)	14	39644387	39652422	5411	0	ENSG00000100941	PNN	pinin, desmosome associated protein
chr14	45267578	45267867	290	36	3.8905	6.95674	3.69448	Distal Intergenic	14	45366507	45376460	122525	-98640	ENSG00000179476	C14orf28	chromosome 14 open reading frame 28
chr14	45366504	45367009	506	104	4.78247	13.9803	10.4853	Promoter (<=1kb)	14	45366507	45376460	122525	0	ENSG00000179476	C14orf28	chromosome 14 open reading frame 28
chr14	45431309	45431679	371	343	6.92124	38.2056	34.3824	Promoter (<=1kb)	14	45431416	45466607	23116	0	ENSG00000198718	TOGARAM1	TOG array regulator of axonemal microtubules 1
chr14	45603402	45603903	502	843	16.3517	88.4791	84.3028	Promoter (<=1kb)	14	45584802	45604009	2287	106	ENSG00000100442	FKBP3	FK506 binding protein 3
chr14	50065421	50065847	427	400	8.45084	43.9186	40.0463	Promoter (<=1kb)	14	50065415	50081390	122769	6	ENSG00000165501	LRR1	leucine rich repeat protein 1
chr14	50154692	50155166	475	995	12.9689	103.765	99.5002	Promoter (<=1kb)	14	50110270	50155098	5427	0	ENSG00000100479	POLE2	DNA polymerase epsilon 2, accessory subunit
chr14	50159740	50160111	372	100	4.33691	13.565	10.0785	Promoter (<=1kb)	14	50159823	50219870	122773	0	ENSG00000197776	KLHDC1	kelch domain containing 1
chr14	50234619	50235407	789	144	5.97373	18.0327	14.4585	Promoter (<=1kb)	14	50234787	50249856	23588	0	ENSG00000165516	KLHDC2	kelch domain containing 2
chr14	50328758	50328987	230	113	6.66106	14.9042	11.3893	Distal Intergenic	14	50286814	50319539	9147	-9219	ENSG00000165525	NEMF	nuclear export mediator factor
chr14	50359526	50359917	392	132	5.03926	16.8409	13.2878	Promoter (<=1kb)	14	50359736	50363772	382	0	ENSG00000165527	ARF6	ADP ribosylation factor 6
chr14	50582907	50583517	611	1564	18.6756	161.042	156.455	Promoter (<=1kb)	14	50575350	50582944	79609	0	ENSG00000100483	VCPKMT	valosin containing protein lysine methyltransferase
chr14	50863388	50863762	375	16	2.31353	4.70692	1.61478	Promoter (<=1kb)	14	50796720	50862642	8814	-746	ENSG00000100490	CDKL1	cyclin dependent kinase like 1
chr14	51297658	51298017	360	51	3.58756	8.51788	5.18114	Promoter (<=1kb)	14	51186481	51297839	51199	0	ENSG00000100503	NIN	ninein
chr14	51706828	51707229	402	510	9.87852	55.0112	51.0523	Promoter (<=1kb)	14	51706886	51712569	81542	0	ENSG00000139921	TMX1	thioredoxin related transmembrane protein 1
chr14	53173699	53174099	401	479	9.51711	51.8744	47.9388	Promoter (<=1kb)	14	53173896	53177053	5706	0	ENSG00000100519	PSMC6	proteasome 26S subunit, ATPase 6
chr14	53196828	53197036	209	65	3.49377	9.90532	6.52046	Promoter (<=1kb)	14	53196883	53241705	6815	0	ENSG00000198252	STYX	serine/threonine/tyrosine interacting protein
chr14	53417591	53417945	355	88	3.95678	12.279	8.82536	Promoter (<=1kb)	14	53323989	53417591	10979	0	ENSG00000073712	FERMT2	fermitin family member 2
chr14	54907644	54908074	431	14	2.12765	4.56748	1.49337	Promoter (<=1kb)	14	54893647	54908148	10175	74	ENSG00000100528	CNIH1	cornichon family AMPA receptor auxiliary protein 1
chr14	54955355	54955820	466	66	3.61074	10.06	6.66937	Promoter (<=1kb)	14	54941209	54955744	2764	0	ENSG00000197045	GMFB	glia maturation factor beta
chr14	55878257	55878765	509	2019	17.6709	206.765	201.975	Promoter (<=1kb)	14	55833109	55878576	22863	0	ENSG00000126775	ATG14	autophagy related 14
chr14	56585064	56585498	435	80	4.34859	11.467	8.03323	Promoter (<=1kb)	14	56585093	56768031	57161	0	ENSG00000139946	PELI2	pellino E3 ubiquitin protein ligase family member 2
chr14	57735197	57735731	535	369	7.41064	40.804	36.9583	Promoter (<=1kb)	14	57669194	57735617	10640	0	ENSG00000070367	EXOC5	exocyst complex component 5
chr14	58764462	58765025	564	207	5.22106	24.4074	20.7363	Promoter (<=1kb)	14	58470808	58764855	145407	0	ENSG00000139971	ARMH4	armadillo-like helical domain containing 4
chr14	58765583	58766180	598	188	5.11982	22.5137	18.8691	Promoter (<=1kb)	14	58765222	58840451	5926	361	ENSG00000032219	ARID4A	AT-rich interaction domain 4A
chr14	60043312	60043626	315	137	5.29422	17.2757	13.7142	Promoter (<=1kb)	14	59971785	60043549	729665	0	ENSG00000151838	CCDC175	coiled-coil domain containing 175
chr14	60337171	60337480	310	94	3.65671	12.9665	9.49483	Promoter (<=1kb)	14	60062694	60337557	6252	77	ENSG00000139970	RTN1	reticulon 1
chr14	60558433	60558996	564	208	5.50791	24.4852	20.8126	Promoter (<=1kb)	14	60558629	60601532	64430	0	ENSG00000126773	PCNX4	pecanex homolog 4
chr14	62162438	62162954	517	527	7.69872	56.7708	52.7991	Promoter (<=1kb)	14	62162119	62214977	3091	319	ENSG00000100644	HIF1A	hypoxia inducible factor 1 alpha subunit
chr14	65068316	65068774	459	256	7.5574	29.4001	25.6666	Distal Intergenic	14	65052826	65056096	145376	15490	ENSG00000165807	PPP1R36	protein phosphatase 1 regulatory subunit 36
chr14	66975042	66975579	538	180	5.81453	21.6486	18.0168	Promoter (<=1kb)	14	66974125	67648525	10243	917	ENSG00000171723	GPHN	gephyrin
chr14	68141121	68141341	221	46	2.81389	7.94878	4.63813	Promoter (<=1kb)	14	68117867	68141602	10490	261	ENSG00000100568	VTI1B	vesicle transport through interaction with t-SNAREs 1B
chr14	68162057	68162364	308	158	4.98724	19.4883	15.8893	Promoter (<=1kb)	14	68143519	68162510	51109	146	ENSG00000072042	RDH11	retinol dehydrogenase 11
chr14	68283079	68283402	324	137	5.29422	17.2757	13.7142	Promoter (<=1kb)	14	68213237	68283306	23503	0	ENSG00000072121	ZFYVE26	zinc finger FYVE-type containing 26
chr14	69282929	69283511	583	2438	23.5132	248.835	243.876	Distal Intergenic	14	69254372	69262960	677	-19969	ENSG00000185650	ZFP36L1	ZFP36 ring finger protein like 1
chr14	70233619	70233909	291	149	4.22084	18.512	14.9293	Promoter (<=1kb)	14	70233829	70237257	6430	0	ENSG00000100650	SRSF5	serine and arginine rich splicing factor 5
chr14	70234167	70234731	565	4780	50.1558	483.58	478.055	Promoter (<=1kb)	14	70233000	70234430	100289511	0	NA	LOC100289511	uncharacterized LOC100289511
chr14	71067250	71067559	310	79	5.85261	11.331	7.90217	Promoter (<=1kb)	14	71050957	71067384	10001	0	ENSG00000133997	MED6	mediator complex subunit 6
chr14	71373953	71374594	642	924	11.2818	96.718	92.4943	Promoter (<=1kb)	14	71374122	71479537	22990	0	ENSG00000100731	PCNX1	pecanex homolog 1
chr14	73360749	73360963	215	62	3.1704	9.58856	6.21268	Promoter (<=1kb)	14	73086004	73360809	8110	0	ENSG00000205683	DPF3	double PHD fingers 3
chr14	73524951	73525292	342	51	2.94309	8.47696	5.14125	Promoter (<=1kb)	14	73525221	73567884	58517	0	ENSG00000119707	RBM25	RNA binding motif protein 25
chr14	74035854	74036391	538	258	6.74631	29.6143	25.878	Promoter (<=1kb)	14	74035763	74042362	10965	91	ENSG00000119673	ACOT2	acyl-CoA thioesterase 2
chr14	74180380	74180848	469	894	14.6009	93.6159	89.4094	Promoter (<=1kb)	14	74178486	74181128	9240	280	ENSG00000176903	PNMA1	PNMA family member 1
chr14	74353195	74353556	362	15	2.58423	4.57666	1.50107	Promoter (<=1kb)	14	74353318	74371786	57862	0	ENSG00000119725	ZNF410	zinc finger protein 410
chr14	74416882	74417220	339	189	4.20707	22.5785	18.9322	Promoter (<=1kb)	14	74399695	74417117	145483	0	ENSG00000156050	FAM161B	family with sequence similarity 161 member B
chr14	74550942	74551155	214	109	4.09548	14.4744	10.9691	Promoter (<=1kb)	14	74526872	74551196	4329	41	ENSG00000119711	ALDH6A1	aldehyde dehydrogenase 6 family member A1
chr14	74960124	74960720	597	991	13.7014	103.456	99.1921	Promoter (<=1kb)	14	74960423	74962271	122961	0	ENSG00000165898	ISCA2	iron-sulfur cluster assembly 2
chr14	75643139	75643768	630	576	8.74002	61.6949	57.688	Promoter (<=1kb)	14	75598171	75643349	10972	0	ENSG00000170348	TMED10	transmembrane p24 trafficking protein 10
chr14	76448671	76448985	315	118	4.51114	15.404	11.8787	Promoter (<=1kb)	14	76429404	76448092	7043	-579	ENSG00000119699	TGFB3	transforming growth factor beta 3
chr14	77278808	77279341	534	92	4.45829	12.7074	9.2411	Promoter (<=1kb)	14	77253586	77279283	23357	0	ENSG00000013523	ANGEL1	angel homolog 1
chr14	77564128	77564653	526	1981	18.476	202.906	198.133	Promoter (<=1kb)	14	77564578	77583629	85457	0	ENSG00000198894	CIPC	CLOCK interacting pacemaker
chr14	78174036	78174544	509	576	8.74002	61.6949	57.688	Promoter (<=1kb)	14	78174414	78183941	81892	0	ENSG00000119705	SLIRP	SRA stem-loop interacting RNA binding protein
chr14	78227224	78227535	312	23	2.65279	5.5445	2.37814	Promoter (<=1kb)	14	78183944	78227497	22938	0	ENSG00000100603	SNW1	SNW domain containing 1
chr14	81687182	81687932	751	553	11.2851	59.3555	55.3653	Promoter (<=1kb)	14	81641796	81687296	2957	0	ENSG00000165417	GTF2A1	general transcription factor IIA subunit 1
chr14	89290889	89291272	384	238	5.58113	27.5209	23.809	Promoter (<=1kb)	14	89290918	89344335	123016	0	ENSG00000165533	TTC8	tetratricopeptide repeat domain 8
chr14	89894935	89895185	251	142	5.59248	17.7797	14.2102	Intron (uc001xxo.4/1112, intron 1 of 6)	14	89883698	89886137	400236	11237	ENSG00000258920	FOXN3-AS1	FOXN3 antisense RNA 1
chr14	90798213	90798526	314	118	4.1717	15.3534	11.8284	Promoter (<=1kb)	14	90744398	90798481	55051	0	ENSG00000119720	NRDE2	NRDE-2, necessary for RNA interference, domain containing
chr14	90849358	90849797	440	2336	24.1816	238.532	233.61	Distal Intergenic	14	90863327	90874619	801	-13530	ENSG00000198668	CALM1	calmodulin 1
chr14	91975860	91976931	1072	1806	19.8285	185.376	180.675	Promoter (<=1kb)	14	91923956	91976644	55671	0	ENSG00000100796	PPP4R3A	protein phosphatase 4 regulatory subunit 3A
chr14	92506203	92506585	383	831	10.0335	87.3154	83.1458	Promoter (<=1kb)	14	92434243	92506403	9321	0	ENSG00000100815	TRIP11	thyroid hormone receptor interactor 11
chr14	92572555	92572995	441	166	6.04592	20.3098	16.6973	Promoter (<=1kb)	14	92524896	92572965	4287	0	ENSG00000066427	ATXN3	ataxin 3
chr14	92588110	92588606	497	1406	13.9271	145.136	140.63	Promoter (<=1kb)	14	92582468	92588153	4707	0	ENSG00000183648	NDUFB1	NADH:ubiquinone oxidoreductase subunit B1
chr14	93798815	93799592	778	1251	14.9802	129.566	125.148	Promoter (<=1kb)	14	93703896	93799385	55727	0	ENSG00000011114	BTBD7	BTB domain containing 7
chr14	95623272	95623938	667	218	6.62318	25.5549	21.8684	Promoter (<=1kb)	14	95552565	95623759	23405	0	ENSG00000100697	DICER1	dicer 1, ribonuclease III
chr14	96829878	96830129	252	69	3.87635	10.3867	6.9842	Promoter (<=1kb)	14	96829789	96853627	51527	89	ENSG00000100744	GSKIP	GSK3B interacting protein
chr14	96968556	96968948	393	782	11.1571	82.3605	78.2203	Promoter (<=1kb)	14	96968713	97001935	10914	0	ENSG00000090060	PAPOLA	poly(A) polymerase alpha
chr14	99947529	99948005	477	597	7.29452	63.7807	59.76	Promoter (<=1kb)	14	99947739	99977852	8812	0	ENSG00000090061	CCNK	cyclin K
chr14	100259771	100260202	432	66	4.80591	10.0209	6.63193	Promoter (<=1kb)	14	100259745	100408395	2009	26	ENSG00000066629	EML1	echinoderm microtubule associated protein like 1
chr14	100437914	100438307	394	338	8.69628	37.6365	33.8187	Promoter (<=1kb)	14	100438151	100610573	51466	0	ENSG00000196405	EVL	Enah/Vasp-like
chr14	100625586	100625829	244	18	2.68743	5.00854	1.87456	Promoter (<=1kb)	14	100612753	100626012	123099	183	ENSG00000168350	DEGS2	delta 4-desaturase, sphingolipid 2
chr14	100704316	100704621	306	28	2.7589	6.04115	2.83125	Promoter (<=1kb)	14	100705102	100745371	7528	-481	ENSG00000100811	YY1	YY1 transcription factor
chr14	100705817	100706786	970	5950	59.2117	600.781	595.039	Promoter (<=1kb)	14	100705102	100745371	7528	715	ENSG00000100811	YY1	YY1 transcription factor
chr14	102430748	102431854	1107	787	12.8903	82.8481	78.7047	Promoter (<=1kb)	14	102430865	102517135	1778	0	ENSG00000197102	DYNC1H1	dynein cytoplasmic 1 heavy chain 1
chr14	102605897	102606762	866	1176	18.0634	122.028	117.655	Promoter (<=1kb)	14	102547075	102606086	3320	0	ENSG00000080824	HSP90AA1	heat shock protein 90 alpha family class A member 1
chr14	102729425	102729800	376	173	8.01216	20.9302	17.309	Intron (uc001ylm.4/5891, intron 4 of 11)	14	102695158	102706958	5891	-22467	ENSG00000080823	MOK	MOK protein kinase
chr14	102771113	102771646	534	390	7.02629	42.9405	39.0759	Promoter (<=1kb)	14	102695158	102771537	5891	0	ENSG00000080823	MOK	MOK protein kinase
chr14	102785910	102786334	425	462	7.71178	50.2155	46.2929	Promoter (<=1kb)	14	102786088	102809511	55778	0	ENSG00000022976	ZNF839	zinc finger protein 839
chr14	102904435	102904777	343	328	6.57133	36.6336	32.8251	Exon (uc010awl.3/9895, exon 10 of 17)	14	102973198	102975154	122416	70377	ENSG00000156381	ANKRD9	ankyrin repeat domain 9
chr14	102976106	102976322	217	64	3.46828	9.81699	6.43455	Promoter (<=1kb)	14	102973198	102976128	122416	0	ENSG00000156381	ANKRD9	ankyrin repeat domain 9
chr14	103058836	103059370	535	84	4.27747	11.8682	8.42469	Promoter (<=1kb)	14	103058996	103196913	23186	0	ENSG00000089902	RCOR1	REST corepressor 1
chr14	103142668	103142940	273	36	3.62993	6.91333	3.65296	Intron (uc001ymb.4/23186, intron 2 of 11)	14	103058996	103196913	23186	83672	ENSG00000089902	RCOR1	REST corepressor 1
chr14	103523420	103523767	348	76	4.02074	11.0994	7.67779	Promoter (<=1kb)	14	103398716	103523742	9578	0	ENSG00000198752	CDC42BPB	CDC42 binding protein kinase beta
chr14	103800612	103801332	721	851	13.4457	89.2841	85.1027	Promoter (<=1kb)	14	103801198	103811361	1983	0	ENSG00000100664	EIF5	eukaryotic translation initiation factor 5
chr14	103851460	103852219	760	3825	30.1616	387.884	382.548	Promoter (<=1kb)	14	103851701	103970166	4140	0	ENSG00000075413	MARK3	microtubule affinity regulating kinase 3
chr14	103894030	103894262	233	32	4.08223	6.52253	3.2896	Intron (uc001ymw.4/4140, intron 2 of 15)	14	103931887	103932428	4140	-37625	ENSG00000075413	MARK3	microtubule affinity regulating kinase 3
chr14	104028864	104029443	580	80	4.14513	11.4752	8.04123	Promoter (<=1kb)	14	104029299	104152568	3831	0	ENSG00000126214	KLC1	kinesin light chain 1
chr14	104095369	104095893	525	878	11.9462	92.0229	87.8257	Promoter (<=1kb)	14	104095525	104151653	3831	0	ENSG00000126214	KLC1	kinesin light chain 1
chr14	105190355	105190741	387	204	5.62391	24.1635	20.4948	Promoter (<=1kb)	14	105190534	105213647	122622	0	ENSG00000185100	ADSSL1	adenylosuccinate synthase like 1
chr14	105219445	105219661	217	71	3.14483	10.5101	7.10441	Promoter (<=1kb)	14	105219470	105223822	10572	0	ENSG00000184990	SIVA1	SIVA1 apoptosis inducing factor
chr14	105332025	105332244	220	42	2.88059	7.50343	4.20927	Promoter (<=1kb)	14	105331650	105363107	283638	375	ENSG00000099814	CEP170B	centrosomal protein 170B
chr14	105864526	105864895	370	72	3.80763	10.7032	7.29201	Promoter (<=1kb)	14	105864920	105880196	647310	-25	ENSG00000226174	TEX22	testis expressed 22
chr14	105886234	105886829	596	276	6.86903	31.4476	27.6909	Promoter (<=1kb)	14	105886186	105937057	9112	48	ENSG00000182979	MTA1	metastasis associated 1
chr15	20005787	20006029	243	42	4.82745	7.50176	4.20799	Distal Intergenic	15	20487997	20496811	646096	-481968	ENSG00000259156	CHEK2P2	checkpoint kinase 2 pseudogene 2
chr15	20106488	20106769	282	42	4.82745	7.50176	4.20799	Distal Intergenic	15	20487997	20496811	646096	-381228	ENSG00000259156	CHEK2P2	checkpoint kinase 2 pseudogene 2
chr15	20114420	20114718	299	69	5.94148	10.3523	6.9518	Distal Intergenic	15	20487997	20496811	646096	-373279	ENSG00000259156	CHEK2P2	checkpoint kinase 2 pseudogene 2
chr15	20120419	20121434	1016	63	4.98948	9.71984	6.34025	Distal Intergenic	15	20487997	20496811	646096	-366563	ENSG00000259156	CHEK2P2	checkpoint kinase 2 pseudogene 2
chr15	20145730	20145956	227	131	8.16954	16.7228	13.1715	Distal Intergenic	15	20487997	20496811	646096	-342041	ENSG00000259156	CHEK2P2	checkpoint kinase 2 pseudogene 2
chr15	20590784	20591077	294	15	3.38836	4.62201	1.53712	Intron (uc001ytg.3/283755, intron 26 of 26)	15	20644356	20667792	283755	76715	ENSG00000180229	HERC2P3	hect domain and RLD 2 pseudogene 3
chr15	23208560	23208815	256	52	3.62236	8.61563	5.27452	Promoter (<=1kb)	15	23190858	23208357	339005	-203	NA	WHAMMP3	WAS protein homolog associated with actin, golgi membranes and microtubules pseudogene 3
chr15	23810770	23811431	662	132	6.13964	16.7868	13.2347	Promoter (<=1kb)	15	23810454	23813166	7681	316	ENSG00000179455	MKRN3	makorin ring finger protein 3
chr15	25018108	25018488	381	636	16.3285	67.6863	63.6384	Distal Intergenic	15	25068794	25223729	6638	-50306	ENSG00000128739	SNRPN	small nuclear ribonucleoprotein polypeptide N
chr15	25123488	25123731	244	99	4.95505	13.4318	9.94967	Intron (uc001ywp.1/6638, intron 2 of 12)	15	25101698	25223729	6638	21790	ENSG00000128739	SNRPN	small nuclear ribonucleoprotein polypeptide N
chr15	25200863	25201663	801	420	9.87543	45.9637	42.0743	Promoter (<=1kb)	15	25201570	25223729	6638	0	ENSG00000128739	SNRPN	small nuclear ribonucleoprotein polypeptide N
chr15	25683858	25684562	705	398	8.55335	43.7545	39.8833	Promoter (<=1kb)	15	25582396	25684175	7337	0	ENSG00000114062	UBE3A	ubiquitin protein ligase E3A
chr15	26327579	26328028	450	142	5.59248	17.7797	14.2102	Distal Intergenic	15	26360960	26371518	503519	-32932	ENSG00000259150	LINC00929	long intergenic non-protein coding RNA 929
chr15	28982536	28982936	401	196	8.66593	23.3237	19.6672	Promoter (<=1kb)	15	28982729	28993563	440253	0	NA	WHAMMP2	WAS protein homolog associated with actin, golgi membranes and microtubules pseudogene 2
chr15	29561956	29562161	206	63	4.85009	9.78014	6.39827	Promoter (<=1kb)	15	29560353	29562020	56160	0	ENSG00000185115	NSMCE3	NSE3 homolog, SMC5-SMC6 complex component
chr15	30114070	30114400	331	352	8.99709	39.1302	35.2988	Promoter (<=1kb)	15	29992357	30114706	7082	306	ENSG00000104067	TJP1	tight junction protein 1
chr15	31284005	31284225	221	70	4.54499	10.4149	7.01164	Promoter (<=1kb)	15	31231151	31283807	54893	-198	ENSG00000166912	MTMR10	myotubularin related protein 10
chr15	31618372	31618755	384	23	2.65279	5.5445	2.37814	Promoter (<=1kb)	15	31619083	31670102	51621	-328	ENSG00000169926	KLF13	Kruppel like factor 13
chr15	32828811	32829299	489	412	10.4056	45.1253	41.2428	Promoter (<=1kb)	15	32828960	32872810	100996255	0	NA	LINC02256	long intergenic non-protein coding RNA 2256
chr15	34393855	34394290	436	1039	12.8726	108.272	103.98	Promoter (<=1kb)	15	34394274	34396591	161779	0	ENSG00000182405	PGBD4	piggyBac transposable element derived 4
chr15	34659375	34660049	675	45	3.3595	7.86547	4.55767	Promoter (<=1kb)	15	34651089	34659395	254531	0	ENSG00000176454	LPCAT4	lysophosphatidylcholine acyltransferase 4
chr15	36871639	36872008	370	863	9.57442	90.5763	86.3875	Promoter (<=1kb)	15	36871812	37102449	84529	0	ENSG00000186073	C15orf41	chromosome 15 open reading frame 41
chr15	38746292	38746707	416	15	2.72066	4.60695	1.52537	Promoter (<=1kb)	15	38746328	38773829	283742	0	ENSG00000171262	FAM98B	family with sequence similarity 98 member B
chr15	40213011	40213471	461	1126	17.8332	117.023	112.678	Promoter (<=1kb)	15	40091223	40213093	11245	0	ENSG00000166073	GPR176	G protein-coupled receptor 176
chr15	40616023	40616712	690	250	6.62584	28.7284	25.0019	Exon (uc001zlf.1/uc001zlf.1, exon 1 of 1)	15	40623653	40630334	388115	13622	ENSG00000188549	CCDC9B	coiled-coil domain containing 9B
chr15	40674884	40675274	391	266	9.61182	30.4173	26.6723	Promoter (<=1kb)	15	40674922	40686489	90417	0	ENSG00000128944	KNSTRN	kinetochore localized astrin (SPAG5) binding protein
chr15	40697798	40698171	374	170	4.77097	20.6823	17.0645	Promoter (<=1kb)	15	40697686	40713512	3712	112	ENSG00000128928	IVD	isovaleryl-CoA dehydrogenase
chr15	40886103	40886351	249	235	9.21517	27.2418	23.5335	Promoter (<=1kb)	15	40886447	40917838	57082	-96	ENSG00000137812	KNL1	kinetochore scaffold 1
chr15	41047336	41047606	271	81	4.38329	11.5628	8.12582	Promoter (<=1kb)	15	41028086	41047447	55177	0	ENSG00000137824	RMDN3	regulator of microtubule dynamics 3
chr15	41408142	41408742	601	816	16.541	85.8244	81.6636	Promoter (<=1kb)	15	41271079	41408340	54617	0	ENSG00000128908	INO80	INO80 complex subunit
chr15	41576015	41576539	525	286	6.88298	32.4323	28.6654	Promoter (<=1kb)	15	41576201	41591795	729082	0	ENSG00000247556	OIP5-AS1	OIP5 antisense RNA 1
chr15	41624530	41624982	453	822	14.4895	86.4239	82.2591	Promoter (<=1kb)	15	41601466	41624819	11339	0	ENSG00000104147	OIP5	Opa interacting protein 5
chr15	41836210	41836678	469	2267	26.2624	231.616	226.721	Promoter (<=1kb)	15	41809375	41836464	26015	0	ENSG00000103932	RPAP1	RNA polymerase II associated protein 1
chr15	41913963	41914351	389	382	9.05591	42.1532	38.2957	Promoter (<=1kb)	15	41913764	42005694	23269	199	ENSG00000174197	MGA	MGA, MAX dimerization protein
chr15	42565537	42565747	211	72	3.34177	10.7112	7.29949	Promoter (<=1kb)	15	42502726	42565755	25963	8	ENSG00000103978	TMEM87A	transmembrane protein 87A
chr15	42840968	42841229	262	145	4.55095	18.1124	14.536	Promoter (<=1kb)	15	42834720	42841000	255252	0	ENSG00000180979	LRRC57	leucine rich repeat containing 57
chr15	43029105	43029442	338	196	6.07295	23.3293	19.6722	Promoter (<=1kb)	15	43015760	43029417	146059	0	ENSG00000140326	CDAN1	codanin 1
chr15	43398190	43398411	222	24	2.84266	5.60044	2.42685	Promoter (<=1kb)	15	43235098	43398286	197131	0	ENSG00000159459	UBR1	ubiquitin protein ligase E3 component n-recognin 1
chr15	43785074	43785311	238	58	3.76169	9.26059	5.8988	Promoter (<=1kb)	15	43699412	43785354	7158	43	ENSG00000067369	TP53BP1	tumor protein p53 binding protein 1
chr15	43802831	43803069	239	57	4.25956	9.14245	5.78486	Promoter (<=1kb)	15	43699412	43802707	7158	-124	ENSG00000067369	TP53BP1	tumor protein p53 binding protein 1
chr15	44719702	44719919	218	141	4.60661	17.6881	14.1195	Promoter (<=1kb)	15	44719861	44819429	51496	0	ENSG00000137770	CTDSPL2	CTD small phosphatase like 2
chr15	44828678	44828987	310	223	5.70819	26.085	22.3912	Promoter (<=1kb)	15	44826703	44829098	645212	111	NA	EIF3J-DT	EIF3J divergent transcript
chr15	44955601	44956060	460	1151	15.697	119.517	115.159	Promoter (<=1kb)	15	44854894	44955876	80208	0	ENSG00000104133	SPG11	SPG11, spatacsin vesicle trafficking associated
chr15	48470094	48470731	638	595	10.8423	63.6028	59.5834	Promoter (<=1kb)	15	48431629	48470558	50804	0	ENSG00000104177	MYEF2	myelin expression factor 2
chr15	48623319	48623626	308	87	4.09597	12.1854	8.73401	Promoter (<=1kb)	15	48623621	48635570	1854	0	ENSG00000128951	DUT	deoxyuridine triphosphatase
chr15	49170310	49170727	418	175	6.19707	21.1747	17.5495	Promoter (<=1kb)	15	49170290	49172380	23741	20	ENSG00000255302	EID1	EP300 interacting inhibitor of differentiation 1
chr15	49338519	49338953	435	285	7.10772	32.3175	28.5519	Promoter (<=1kb)	15	49280835	49338760	9728	0	ENSG00000138593	SECISBP2L	SECIS binding protein 2 like
chr15	51057819	51058097	279	35	3.2044	6.77922	3.52302	Promoter (<=1kb)	15	50999737	51057910	84888	0	ENSG00000138600	SPPL2A	signal peptide peptidase like 2A
chr15	52029672	52029992	321	87	4.09597	12.1854	8.73401	Promoter (<=1kb)	15	52015261	52030320	256586	328	ENSG00000140280	LYSMD2	LysM domain containing 2
chr15	52121954	52122269	316	46	3.48304	7.98667	4.67406	Promoter (<=1kb)	15	52121825	52204331	29766	129	ENSG00000138594	TMOD3	tropomodulin 3
chr15	52263623	52264038	416	212	5.73002	24.9718	21.2923	Promoter (<=1kb)	15	52230222	52263958	123169	0	ENSG00000166477	LEO1	LEO1 homolog, Paf1/RNA polymerase II complex component
chr15	52311256	52311682	427	1471	25.4878	151.713	147.174	Promoter (<=1kb)	15	52311411	52358462	5597	0	ENSG00000069956	MAPK6	mitogen-activated protein kinase 6
chr15	52587904	52588201	298	57	3.61793	9.09627	5.73998	Promoter (<=1kb)	15	52484515	52587995	55930	0	ENSG00000128833	MYO5C	myosin VC
chr15	52820903	52821339	437	91	4.76162	12.5813	9.11863	Promoter (<=1kb)	15	52599480	52821247	4644	0	ENSG00000197535	MYO5A	myosin VA
chr15	52860938	52861462	525	1666	26.0966	171.269	166.632	Promoter (<=1kb)	15	52839432	52861213	10776	0	ENSG00000128989	ARPP19	cAMP regulated phosphoprotein 19
chr15	56535605	56535942	338	192	6.49937	22.9356	19.2837	Promoter (<=1kb)	15	56382731	56535483	64864	-122	ENSG00000181827	RFX7	regulatory factor X7
chr15	56657504	56657718	215	74	3.85503	10.8554	7.43931	Promoter (<=1kb)	15	56657644	56738072	374618	0	ENSG00000151575	TEX9	testis expressed 9
chr15	56757138	56757387	250	93	6.00949	12.8027	9.33434	Promoter (<=1kb)	15	56720929	56757335	55329	0	ENSG00000138587	MNS1	meiosis specific nuclear structural 1
chr15	57210764	57211093	330	198	6.24749	23.4727	19.8141	Promoter (<=1kb)	15	57210833	57574796	6938	0	ENSG00000140262	TCF12	transcription factor 12
chr15	57998744	57999273	530	721	11.7349	76.2556	72.1527	Promoter (<=1kb)	15	57998901	58001556	81488	0	ENSG00000255529	POLR2M	RNA polymerase II subunit M
chr15	59063321	59063800	480	705	11.6555	74.5994	70.5068	Promoter (<=1kb)	15	59063393	59149734	54629	0	ENSG00000128923	MINDY2	MINDY lysine 48 deubiquitinase 2
chr15	59225275	59226138	864	1632	30.412	167.894	163.274	Promoter (<=1kb)	15	59171244	59225852	79811	0	ENSG00000137776	SLTM	SAFB like transcription modulator
chr15	60770910	60771312	403	524	12.0573	56.4467	52.4771	Promoter (<=1kb)	15	60745802	60771128	79664	0	ENSG00000128915	ICE2	interactor of little elongation complex ELL subunit 2
chr15	64388026	64388462	437	472	9.82009	51.1881	47.2577	Promoter (<=1kb)	15	64388083	64427153	6642	0	ENSG00000028528	SNX1	sorting nexin 1
chr15	64679879	64680212	334	166	5.09335	20.2459	16.6349	Promoter (<=1kb)	15	64680003	64747502	9325	0	ENSG00000103671	TRIP4	thyroid hormone receptor interactor 4
chr15	65670040	65670517	478	181	6.56775	21.795	18.1607	Promoter (<=1kb)	15	65619465	65670378	9543	0	ENSG00000174498	IGDCC3	immunoglobulin superfamily DCC subclass member 3
chr15	65714905	65715650	746	297	11.0294	33.5051	29.7269	Promoter (<=1kb)	15	65673825	65715410	57722	0	ENSG00000103742	IGDCC4	immunoglobulin superfamily DCC subclass member 4
chr15	66084383	66084834	452	1024	13.6196	106.754	102.471	Promoter (<=1kb)	15	65952957	66084631	10260	0	ENSG00000174485	DENND4A	DENN domain containing 4A
chr15	66585790	66586135	346	193	5.64179	23.0474	19.394	Promoter (<=1kb)	15	66585920	66618899	115752	0	ENSG00000166938	DIS3L	DIS3 like exosome 3'-5' exoribonuclease
chr15	67546797	67547176	380	531	12.5364	57.14	53.1656	Promoter (<=1kb)	15	67547138	67599561	64799	0	ENSG00000103599	IQCH	IQ motif containing H
chr15	67834694	67835211	518	1371	18.5523	141.68	137.192	Promoter (<=1kb)	15	67835021	68099455	5607	0	ENSG00000137764	MAP2K5	mitogen-activated protein kinase kinase 5
chr15	68346414	68346927	514	986	17.8857	102.954	98.6944	Promoter (<=1kb)	15	68346572	68446077	8554	0	ENSG00000033800	PIAS1	protein inhibitor of activated STAT 1
chr15	68570317	68570822	506	157	5.23549	19.3055	15.709	Promoter (<=1kb)	15	68570141	68583640	10116	176	ENSG00000169018	FEM1B	fem-1 homolog B
chr15	69110045	69110857	813	1901	33.4179	194.856	190.117	Promoter (2-3kb)	15	69070875	69113261	8125	2404	ENSG00000140350	ANP32A	acidic nuclear phosphoprotein 32 family member A
chr15	70391431	70392127	697	277	9.84068	31.524	27.7667	Promoter (1-2kb)	15	70340543	70390256	7090	-1175	ENSG00000140332	TLE3	transducin like enhancer of split 3
chr15	71184471	71184704	234	149	5.85281	18.5207	14.9379	Promoter (<=1kb)	15	71173681	71184772	56906	68	ENSG00000129028	THAP10	THAP domain containing 10
chr15	72978470	72978804	335	276	6.98725	31.409	27.6528	Promoter (<=1kb)	15	72968123	72978490	123346	0	ENSG00000175202	HIGD2B	HIG1 hypoxia inducible domain family member 2B
chr15	73344897	73345137	241	54	4.25664	8.84165	5.49462	Promoter (<=1kb)	15	73344825	73597547	4756	72	ENSG00000067141	NEO1	neogenin 1
chr15	75182244	75182610	367	467	7.04181	50.63	46.7037	Promoter (<=1kb)	15	75182410	75189296	4351	0	ENSG00000178802	MPI	mannose phosphate isomerase
chr15	75198894	75199363	470	542	10.0941	58.2568	54.2744	Promoter (<=1kb)	15	75192328	75199462	57184	99	ENSG00000178761	FAM219B	family with sequence similarity 219 member B
chr15	75230184	75230539	356	107	4.86402	14.2156	10.7157	Promoter (<=1kb)	15	75212617	75230495	9377	0	ENSG00000178741	COX5A	cytochrome c oxidase subunit 5A
chr15	75660753	75661105	353	162	5.19044	19.8804	16.2755	Promoter (<=1kb)	15	75648133	75660968	4123	0	ENSG00000140400	MAN2C1	mannosidase alpha class 2C member 1
chr15	75746732	75747197	466	99	4.59762	13.438	9.95372	Promoter (<=1kb)	15	75661720	75748124	25942	927	ENSG00000169375	SIN3A	SIN3 transcription regulator family member A
chr15	75870991	75871221	231	56	3.76801	9.01958	5.66547	Promoter (<=1kb)	15	75759462	75871625	5780	404	ENSG00000169410	PTPN9	protein tyrosine phosphatase, non-receptor type 9
chr15	75871626	75871872	247	42	3.4764	7.50039	4.20799	Promoter (<=1kb)	15	75759462	75871625	5780	-1	ENSG00000169410	PTPN9	protein tyrosine phosphatase, non-receptor type 9
chr15	75932303	75932704	402	354	6.84139	39.2473	35.4151	Promoter (<=1kb)	15	75931426	75932664	55272	0	ENSG00000177971	IMP3	IMP3, U3 small nucleolar ribonucleoprotein
chr15	76135650	76136578	929	265	7.53601	30.3329	26.5894	Promoter (<=1kb)	15	76136385	76193388	92912	0	ENSG00000140367	UBE2Q2	ubiquitin conjugating enzyme E2 Q2
chr15	77197319	77197785	467	908	15.2113	95.0238	90.8097	Promoter (<=1kb)	15	76672050	77197744	49855	0	ENSG00000140386	SCAPER	S-phase cyclin A associated protein in the ER
chr15	77223803	77224287	485	107	5.12022	14.2221	10.7216	Promoter (<=1kb)	15	77223962	77242601	5955	0	ENSG00000117906	RCN2	reticulocalbin 2
chr15	77363203	77363563	361	449	11.0466	48.8764	44.964	Promoter (<=1kb)	15	77336360	77363570	10099	7	ENSG00000140391	TSPAN3	tetraspanin 3
chr15	78591886	78592190	305	272	9.12553	30.9927	27.2413	Promoter (<=1kb)	15	78575578	78591940	80349	0	ENSG00000140395	WDR61	WD repeat domain 61
chr15	78832622	78833098	477	257	6.97743	29.4885	25.7532	Promoter (<=1kb)	15	78832747	78841563	5685	0	ENSG00000041357	PSMA4	proteasome subunit alpha 4
chr15	79165165	79166220	1056	5612	83.0321	566.907	561.244	Promoter (<=1kb)	15	79165331	79190081	10933	0	ENSG00000185787	MORF4L1	mortality factor 4 like 1
chr15	80189062	80189772	711	80	3.9755	11.514	8.07816	Promoter (<=1kb)	15	80135889	80189339	10588	0	ENSG00000136371	MTHFS	methenyltetrahydrofolate synthetase
chr15	80215932	80216332	401	185	5.20747	22.1441	18.5045	Promoter (<=1kb)	15	80191182	80216096	400410	0	ENSG00000180953	ST20	suppressor of tumorigenicity 20
chr15	80696756	80697019	264	78	3.75146	11.2965	7.86906	Promoter (<=1kb)	15	80696692	80890277	9915	64	ENSG00000172379	ARNT2	aryl hydrocarbon receptor nuclear translocator 2
chr15	81281880	81282460	581	1084	14.6434	112.749	108.431	Promoter (<=1kb)	15	81239668	81282205	23184	0	ENSG00000117899	MESD	mesoderm development LRP chaperone
chr15	83679955	83680216	262	28	2.82089	6.06274	2.84981	Promoter (<=1kb)	15	83657715	83680393	123207	177	ENSG00000169609	C15orf40	chromosome 15 open reading frame 40
chr15	83735416	83736103	688	248	8.19251	28.6211	24.8958	Promoter (<=1kb)	15	83736087	83736167	100616404	0	ENSG00000263643	MIR4515	microRNA 4515
chr15	83875646	83876264	619	276	8.25842	31.4493	27.6923	Promoter (<=1kb)	15	83806804	83876770	50810	506	ENSG00000166503	HDGFL3	HDGF like 3
chr15	85113900	85114178	279	162	5.19044	19.8804	16.2755	Promoter (<=1kb)	15	85070427	85114026	388165	0	ENSG00000189136	UBE2Q2P1	ubiquitin conjugating enzyme E2 Q2 pseudogene 1
chr15	85176932	85177240	309	32	3.45906	6.52958	3.29413	Promoter (2-3kb)	15	85174691	85185694	54581	2241	NA	SCAND2P	SCAN domain containing 2 pseudogene
chr15	85291577	85292154	578	531	11.0064	57.1247	53.1507	Promoter (<=1kb)	15	85291818	85349663	9640	0	ENSG00000166716	ZNF592	zinc finger protein 592
chr15	89010332	89010753	422	1369	21.463	141.433	136.947	Promoter (<=1kb)	15	89002709	89010633	26589	0	ENSG00000259494	MRPL46	mitochondrial ribosomal protein L46
chr15	89089868	89090073	206	36	3.73616	6.89568	3.63558	Promoter (<=1kb)	15	89054786	89089912	55070	0	ENSG00000140543	DET1	DET1, COP1 ubiquitin ligase partner
chr15	89877487	89877951	465	132	5.03926	16.8409	13.2878	Promoter (<=1kb)	15	89859536	89878026	5428	75	ENSG00000140521	POLG	DNA polymerase gamma, catalytic subunit
chr15	90808885	90809122	238	74	4.23215	10.8465	7.43116	Promoter (<=1kb)	15	90773477	90808991	10519	0	ENSG00000185043	CIB1	calcium and integrin binding 1
chr15	90931371	90931744	374	148	5.4326	18.4558	14.8738	Promoter (<=1kb)	15	90931473	91045475	8826	0	ENSG00000140575	IQGAP1	IQ motif containing GTPase activating protein 1
chr15	91073116	91073522	407	202	6.52155	23.8918	20.2269	Promoter (<=1kb)	15	91073118	91142767	64784	0	ENSG00000140577	CRTC3	CREB regulated transcription coactivator 3
chr15	93277367	93277608	242	155	7.61552	19.1199	15.5269	Promoter (<=1kb)	15	93160679	93277304	400451	-63	ENSG00000185442	FAM174B	family with sequence similarity 174 member B
chr15	93352256	93352913	658	1865	17.7403	191.243	186.517	Distal Intergenic	15	93338714	93340338	728619	13542	NA	ASB9P1	ankyrin repeat and SOCS box containing 9 pseudogene 1
chr15	93363521	93363942	422	1013	18.4989	105.659	101.383	Distal Intergenic	15	93338714	93340338	728619	24807	NA	ASB9P1	ankyrin repeat and SOCS box containing 9 pseudogene 1
chr15	93425695	93426269	575	1218	23.5683	126.213	121.815	Promoter (<=1kb)	15	93426073	93441977	100507217	0	NA	LINC01578	long intergenic non-protein coding RNA 1578
chr15	93447029	93447762	734	598	11.8423	63.8805	59.8587	Promoter (<=1kb)	15	93447629	93447705	100422995	0	ENSG00000284324	MIR3175	microRNA 3175
chr15	93461078	93461427	350	276	12.6257	31.4102	27.6537	Intron (uc002bsm.2/1106, intron 3 of 9)	15	93447703	93492463	1106	13375	ENSG00000173575	CHD2	chromodomain helicase DNA binding protein 2
chr15	96884203	96884586	384	89	4.26399	12.4261	8.96645	Distal Intergenic	15	96876569	96883492	7026	7634	ENSG00000185551	NR2F2	nuclear receptor subfamily 2 group F member 2
chr15	101791919	101792733	815	118	5.8809	15.3519	11.8278	Promoter (<=1kb)	15	101715928	101792137	22856	0	ENSG00000131873	CHSY1	chondroitin sulfate synthase 1
chr15	101817430	101817653	224	93	4.21644	12.8692	9.39932	Promoter (<=1kb)	15	101811214	101817700	55829	47	ENSG00000131871	SELENOS	selenoprotein S
chr15	102192214	102192760	547	1019	17.8642	106.236	101.957	Promoter (<=1kb)	15	102173180	102192594	80213	0	ENSG00000184277	TM2D3	TM2 domain containing 3
chr15	102264341	102264718	378	131	5.93007	16.6891	13.1393	Promoter (<=1kb)	15	102193955	102264645	123283	0	ENSG00000185418	TARSL2	threonyl-tRNA synthetase like 2
chr16	475904	476223	320	49	3.79887	8.32163	4.99726	Promoter (<=1kb)	16	475668	572481	9727	236	ENSG00000090565	RAB11FIP3	RAB11 family interacting protein 3
chr16	691656	691893	238	40	3.33824	7.3593	4.07952	Promoter (<=1kb)	16	691849	698474	84331	0	ENSG00000172366	MCRIP2	MAPK regulated corepressor interacting protein 2
chr16	699087	699536	450	1512	16.9713	155.772	151.212	Promoter (<=1kb)	16	699363	706537	197335	0	ENSG00000161996	WDR90	WD repeat domain 90
chr16	717775	718145	371	722	12.4651	76.34	72.2367	Promoter (<=1kb)	16	718083	724174	89941	0	ENSG00000140983	RHOT2	ras homolog family member T2
chr16	734143	734538	396	243	6.3188	28.051	24.3324	Promoter (<=1kb)	16	731667	734439	339123	0	ENSG00000161999	JMJD8	jumonji domain containing 8
chr16	790720	791173	454	705	13.8376	74.6083	70.5157	Promoter (<=1kb)	16	779769	790997	64428	0	ENSG00000103245	NARFL	nuclear prelamin A recognition factor like
chr16	857540	858169	630	13361	111.179	1342.69	1336.1	Promoter (2-3kb)	16	855443	863861	388199	2097	ENSG00000167945	PRR25	proline rich 25
chr16	1020775	1021137	363	359	7.78566	39.8028	35.9664	Promoter (<=1kb)	16	903635	1020984	64788	0	ENSG00000103227	LMF1	lipase maturation factor 1
chr16	1040952	1041393	442	230	6.87085	26.7993	23.096	Distal Intergenic	16	1031808	1036979	30812	9144	ENSG00000005513	SOX8	SRY-box 8
chr16	1401716	1402182	467	1367	20.341	141.274	136.789	Promoter (<=1kb)	16	1399241	1401873	115939	0	ENSG00000007520	TSR3	TSR3, acp transferase ribosome maturation factor
chr16	1664019	1664975	957	643	16.6298	68.4001	64.3481	Promoter (<=1kb)	16	1664641	1727909	57585	0	ENSG00000007545	CRAMP1	cramped chromatin regulator homolog 1
chr16	1821336	1821660	325	168	5.47507	20.5075	16.8928	Promoter (<=1kb)	16	1820321	1821710	4832	50	ENSG00000103024	NME3	NME/NM23 nucleoside diphosphate kinase 3
chr16	1822891	1823330	440	461	9.66955	50.0602	46.139	Promoter (<=1kb)	16	1823229	1826340	197342	0	ENSG00000197774	EME2	essential meiotic structure-specific endonuclease subunit 2
chr16	1877198	1877577	380	79	3.51071	11.3911	7.95897	Promoter (<=1kb)	16	1877225	1878908	81889	0	ENSG00000180185	FAHD1	fumarylacetoacetate hydrolase domain containing 1
chr16	2009470	2009783	314	60	3.56965	9.43771	6.06766	Promoter (<=1kb)	16	2009517	2011976	4716	0	ENSG00000140990	NDUFB10	NADH:ubiquinone oxidoreductase subunit B10
chr16	2014441	2014789	349	142	5.73662	17.7937	14.224	Promoter (<=1kb)	16	2012062	2014629	6187	0	ENSG00000140988	RPS2	ribosomal protein S2
chr16	2021768	2022222	455	3441	36.3784	349.363	344.117	Promoter (<=1kb)	16	2022064	2028751	10607	0	ENSG00000183751	TBL3	transducin beta like 3
chr16	2033960	2034493	534	1452	20.2334	149.799	145.269	Promoter (<=1kb)	16	2034150	2037750	2671	0	ENSG00000127554	GFER	growth factor, augmenter of liver regeneration
chr16	2053933	2054303	371	192	5.04102	22.8943	19.2437	Promoter (1-2kb)	16	2047653	2052424	90850	-1509	ENSG00000167962	ZNF598	zinc finger protein 598
chr16	2076946	2077166	221	36	3.2675	6.94894	3.68742	Promoter (<=1kb)	16	2076869	2089027	9351	77	ENSG00000065054	SLC9A3R2	SLC9A3 regulator 2
chr16	2097664	2098092	429	322	7.88192	36.0372	32.2347	Promoter (<=1kb)	16	2089816	2097867	4913	0	ENSG00000065057	NTHL1	nth like DNA glycosylase 1
chr16	2273401	2273797	397	275	7.23586	31.322	27.5669	Promoter (<=1kb)	16	2273567	2285743	1877	0	ENSG00000167967	E4F1	E4F transcription factor 1
chr16	2301232	2301825	594	1275	18.4773	132.001	127.568	Promoter (<=1kb)	16	2289873	2301602	1632	0	ENSG00000167969	ECI1	enoyl-CoA delta isomerase 1
chr16	2563677	2564277	601	2023	27.2612	207.135	202.343	Promoter (<=1kb)	16	2563727	2570224	527	0	ENSG00000185883	ATP6V0C	ATPase H+ transporting V0 subunit c
chr16	2587812	2588373	562	1163	17.2508	120.762	116.396	Promoter (<=1kb)	16	2587965	2612228	5170	0	ENSG00000140992	PDPK1	3-phosphoinositide dependent protein kinase 1
chr16	2653176	2653479	304	88	4.53444	12.2936	8.83874	Promoter (<=1kb)	16	2653385	2667132	652276	0	ENSG00000215154	LOC652276	potassium channel tetramerization domain containing 5 pseudogene
chr16	2732436	2732783	348	300	8.54004	33.873	30.0915	Promoter (<=1kb)	16	2732495	2759031	54442	0	ENSG00000167977	KCTD5	potassium channel tetramerization domain containing 5
chr16	2802030	2802493	464	1491	19.6366	153.723	149.173	Promoter (<=1kb)	16	2802330	2818262	23524	0	ENSG00000167978	SRRM2	serine/arginine repetitive matrix 2
chr16	2827203	2827865	663	2889	44.8165	294.012	288.913	Promoter (<=1kb)	16	2821415	2827297	6923	0	ENSG00000103363	ELOB	elongin B
chr16	2918122	2918588	467	654	13.1499	69.5338	65.4746	Distal Intergenic	16	2902728	2908171	64063	-9951	ENSG00000005001	PRSS22	serine protease 22
chr16	2954237	2954708	472	140	5.16847	17.6164	14.0494	Distal Intergenic	16	2961980	2990158	84256	-7272	ENSG00000059122	FLYWCH1	FLYWCH-type zinc finger 1
chr16	3355380	3355946	567	854	15.217	89.6305	85.4476	Promoter (<=1kb)	16	3355433	3368576	7627	0	ENSG00000162086	ZNF75A	zinc finger protein 75a
chr16	3507705	3508157	453	1518	20.8031	156.382	151.819	Promoter (<=1kb)	16	3507992	3533597	79903	0	ENSG00000122390	NAA60	N(alpha)-acetyltransferase 60, NatF catalytic subunit
chr16	3551068	3551351	284	101	5.15317	13.5886	10.1014	Promoter (<=1kb)	16	3550945	3589051	23059	123	ENSG00000103351	CLUAP1	clusterin associated protein 1
chr16	3930546	3930956	411	277	9.84068	31.524	27.7667	Promoter (<=1kb)	16	3775056	3930121	1387	-425	ENSG00000005339	CREBBP	CREB binding protein
chr16	4475652	4476124	473	950	15.9852	99.2613	95.0232	Promoter (<=1kb)	16	4475806	4506775	9093	0	ENSG00000103423	DNAJA3	DnaJ heat shock protein family (Hsp40) member A3
chr16	4587950	4588303	354	25	3.11968	5.74226	2.55965	Promoter (<=1kb)	16	4560677	4588471	29965	168	ENSG00000089486	CDIP1	cell death inducing p53 target 1
chr16	4664775	4665028	254	70	3.50503	10.419	7.01464	Promoter (<=1kb)	16	4658884	4664927	124402	0	ENSG00000153443	UBALD1	UBA like domain containing 1
chr16	4743151	4743762	612	28	2.82089	6.06274	2.84981	Promoter (<=1kb)	16	4743694	4745856	84309	0	ENSG00000168101	NUDT16L1	nudix hydrolase 16 like 1
chr16	4896858	4897492	635	671	10.8234	71.2013	67.1304	Promoter (<=1kb)	16	4853204	4897303	84656	0	ENSG00000140632	GLYR1	glyoxylate reductase 1 homolog
chr16	5083512	5084177	666	2461	46.7595	251.125	246.159	Promoter (<=1kb)	16	5083703	5092968	100507589	0	NA	NAGPA-AS1	NAGPA antisense RNA 1
chr16	5121684	5122077	394	762	13.7928	80.3338	76.2063	Promoter (<=1kb)	16	5121810	5137380	56052	0	ENSG00000033011	ALG1	ALG1, chitobiosyldiphosphodolichol beta-mannosyltransferase
chr16	5147534	5147908	375	400	8.91561	43.9421	40.0693	Promoter (<=1kb)	16	5134301	5147789	196483	0	ENSG00000118894	EEF2KMT	eukaryotic elongation factor 2 lysine methyltransferase
chr16	8715373	8715741	369	327	9.08426	36.5558	32.7478	Promoter (<=1kb)	16	8715527	8740079	79091	0	ENSG00000067365	METTL22	methyltransferase like 22
chr16	9056810	9057166	357	198	8.7381	23.4719	19.8134	Promoter (<=1kb)	16	8985951	9057341	7874	175	ENSG00000187555	USP7	ubiquitin specific peptidase 7
chr16	9057566	9057931	366	1142	24.7161	118.593	114.241	Promoter (<=1kb)	16	8985951	9057341	7874	-225	ENSG00000187555	USP7	ubiquitin specific peptidase 7
chr16	9185509	9186754	1246	1082	20.5723	112.548	108.23	Promoter (<=1kb)	16	9185537	9213555	29035	0	ENSG00000182831	C16orf72	chromosome 16 open reading frame 72
chr16	11439149	11439678	530	439	10.2781	47.8354	43.931	Promoter (<=1kb)	16	11439311	11445617	116028	0	ENSG00000175643	RMI2	RecQ mediated genome instability 2
chr16	11891034	11891335	302	210	6.80166	24.7361	21.0602	Promoter (<=1kb)	16	11844442	11891114	29066	0	ENSG00000122299	ZC3H7A	zinc finger CCCH-type containing 7A
chr16	11945107	11945563	457	555	9.65615	59.5254	55.5343	Promoter (<=1kb)	16	11928055	11945442	26156	0	ENSG00000171490	RSL1D1	ribosomal L1 domain containing 1
chr16	12346532	12346757	226	36	3.32526	6.88253	3.62289	Intron (uc002dby.5/92017, intron 14 of 20)	16	12154667	12293540	92017	191865	ENSG00000048471	SNX29	sorting nexin 29
chr16	14013915	14014197	283	97	3.44905	13.2363	9.75847	Promoter (<=1kb)	16	14014014	14027104	2072	0	ENSG00000175595	ERCC4	ERCC excision repair 4, endonuclease catalytic subunit
chr16	14396024	14396414	391	37	3.79078	7.01089	3.74543	Promoter (1-2kb)	16	14397824	14397906	574455	-1410	ENSG00000207639	MIR193B	microRNA 193b
chr16	15005238	15005476	239	35	2.82783	6.78321	3.52677	Promoter (<=1kb)	16	15005077	15005170	100422836	161	ENSG00000266291	MIR3180-3	microRNA 3180-3
chr16	15068983	15069267	285	117	3.7156	15.2572	11.7354	Promoter (<=1kb)	16	15068833	15233196	23042	150	ENSG00000179889	PDXDC1	pyridoxal dependent decarboxylase domain containing 1
chr16	15187927	15188261	335	275	7.23586	31.322	27.5669	Promoter (<=1kb)	16	15153879	15188158	54700	0	ENSG00000085721	RRN3	RRN3 homolog, RNA polymerase I transcription factor
chr16	15982254	15982640	387	635	11.7583	67.6212	63.5738	Promoter (<=1kb)	16	15959577	15982447	123811	0	ENSG00000133393	FOPNL	FGFR1OP N-terminal like
chr16	16317194	16317425	232	57	3.88353	9.06642	5.71113	Promoter (<=1kb)	16	16243422	16317328	368	0	ENSG00000091262	ABCC6	ATP binding cassette subfamily C member 6
chr16	16403894	16404205	312	53	3.28203	8.72614	5.38231	Promoter (<=1kb)	16	16403732	16403825	100422836	162	ENSG00000266291	MIR3180-3	microRNA 3180-3
chr16	18801371	18801676	306	38	3.04656	7.13054	3.85857	Promoter (<=1kb)	16	18794277	18801656	6210	0	ENSG00000134419	RPS15A	ribosomal protein S15a
chr16	19179765	19180081	317	107	4.45738	14.2726	10.7705	Promoter (<=1kb)	16	19179638	19278554	51760	127	ENSG00000103528	SYT17	synaptotagmin 17
chr16	19532989	19533597	609	313	8.08066	35.1385	31.3447	Promoter (<=1kb)	16	19513015	19533450	51573	0	ENSG00000006007	GDE1	glycerophosphodiester phosphodiesterase 1
chr16	19535131	19535385	255	78	3.83641	11.3263	7.89778	Promoter (<=1kb)	16	19535179	19538491	9738	0	ENSG00000103540	CCP110	centriolar coiled-coil protein 110
chr16	19566595	19567236	642	14602	96.8798	1466.93	1460.24	Promoter (<=1kb)	16	19566737	19621737	57020	0	ENSG00000103544	VPS35L	VPS35 endosomal protein sorting factor like
chr16	19729409	19729918	510	726	13.3749	76.7318	72.6263	Promoter (<=1kb)	16	19717674	19729492	400506	0	ENSG00000103550	KNOP1	lysine rich nucleolar protein 1
chr16	20817555	20817902	348	87	4.09597	12.1854	8.73401	Promoter (<=1kb)	16	20791515	20817795	112479	0	ENSG00000196678	ERI2	ERI1 exoribonuclease family member 2
chr16	21531328	21531989	662	1097	11.3272	114.072	109.746	Promoter (<=1kb)	16	21475024	21531765	100271836	0	ENSG00000180747	SMG1P3	SMG1 pseudogene 3
chr16	21610633	21610851	219	85	4.31897	11.99	8.54237	Promoter (<=1kb)	16	21610856	21668792	51108	-5	ENSG00000197006	METTL9	methyltransferase like 9
chr16	21831550	21831868	319	324	6.90992	36.2813	32.476	Promoter (<=1kb)	16	21821750	21831731	730092	0	NA	RRN3P1	RRN3 homolog, RNA polymerase I transcription factor pseudogene 1
chr16	22308510	22309314	805	1655	20.1976	170.138	165.506	Promoter (<=1kb)	16	22308696	22340412	55718	0	ENSG00000058600	POLR3E	RNA polymerase III subunit E
chr16	23160392	23161178	787	23841	314.915	2393.67	2384.18	Promoter (<=1kb)	16	23072728	23160591	57478	0	ENSG00000103404	USP31	ubiquitin specific peptidase 31
chr16	23521671	23521917	247	48	3.97687	8.21297	4.89175	Promoter (<=1kb)	16	23474863	23521815	23062	0	ENSG00000103365	GGA2	golgi associated, gamma adaptin ear containing, ARF binding protein 2
chr16	23568514	23569428	915	767	14.6495	80.9068	76.7755	Promoter (<=1kb)	16	23533334	23568696	124454	0	ENSG00000103356	EARS2	glutamyl-tRNA synthetase 2, mitochondrial
chr16	23607499	23607771	273	118	5.13903	15.353	11.8284	Promoter (<=1kb)	16	23592335	23607639	4706	0	ENSG00000004779	NDUFAB1	NADH:ubiquinone oxidoreductase subunit AB1
chr16	24550728	24551184	457	447	11.6748	48.6615	44.7505	Promoter (<=1kb)	16	24550908	24560722	5930	0	ENSG00000122257	RBBP6	RB binding protein 6, ubiquitin ligase
chr16	24740654	24741318	665	1294	27.0047	133.867	129.423	Promoter (<=1kb)	16	24741049	24837547	27327	0	ENSG00000090905	TNRC6A	trinucleotide repeat containing 6A
chr16	25026352	25026631	280	58	4.17278	9.23214	5.87233	Promoter (<=1kb)	16	24930712	25026675	55114	44	ENSG00000140750	ARHGAP17	Rho GTPase activating protein 17
chr16	27560981	27561410	430	341	8.14034	37.9733	34.1528	Promoter (<=1kb)	16	27471934	27561251	2975	0	ENSG00000077235	GTF3C1	general transcription factor IIIC subunit 1
chr16	28223191	28223777	587	8188	71.5833	824.948	818.883	Promoter (<=1kb)	16	28109298	28223239	23214	0	ENSG00000169180	XPO6	exportin 6
chr16	28376016	28376244	229	44	3.25268	7.76719	4.46254	Distal Intergenic	16	28390900	28405372	728689	29128	ENSG00000205609	EIF3CL	eukaryotic translation initiation factor 3 subunit C like
chr16	28503568	28503784	217	71	4.04033	10.5964	7.18764	Promoter (<=1kb)	16	28488600	28503623	1201	0	ENSG00000188603	CLN3	CLN3, battenin
chr16	28761729	28762043	315	65	3.90101	9.92101	6.53512	Intron (uc010vct.2/uc010vct.2, intron 2 of 7)	16	28732576	28747053	728689	29153	ENSG00000205609	EIF3CL	eukaryotic translation initiation factor 3 subunit C like
chr16	28857391	28857755	365	254	6.37481	29.1374	25.4064	Promoter (<=1kb)	16	28853732	28857729	7284	0	ENSG00000178952	TUFM	Tu translation elongation factor, mitochondrial
chr16	28936191	28936653	463	322	7.3306	36.0505	32.2479	Promoter (<=1kb)	16	28915742	28936532	79874	0	ENSG00000177548	RABEP2	rabaptin, RAB GTPase binding effector protein 2
chr16	28985903	28986574	672	1689	23.5454	173.648	168.999	Promoter (<=1kb)	16	28986096	28992008	83985	0	ENSG00000169682	SPNS1	sphingolipid transporter 1 (putative)
chr16	29093384	29093606	223	67	4.55522	10.1221	6.73037	Intron (uc010vdm.1/653390, intron 3 of 10)	16	29086163	29128038	653390	7221	ENSG00000103472	RRN3P2	RRN3 homolog, RNA polymerase I transcription factor pseudogene 2
chr16	29624686	29624966	281	62	3.61409	9.5778	6.20228	Promoter (<=1kb)	16	29454226	29625038	440354	72	NA	SMG1P2	SMG1 pseudogene 2
chr16	29801818	29802328	511	1056	16.9719	109.905	105.604	Promoter (<=1kb)	16	29802034	29816706	3835	0	ENSG00000079616	KIF22	kinesin family member 22
chr16	29816616	29817028	413	759	14.3954	80.0969	75.9704	Promoter (<=1kb)	16	29817417	29822504	4150	-389	ENSG00000103495	MAZ	MYC associated zinc finger protein
chr16	29827150	29827572	423	727	10.0253	76.8944	72.7874	Promoter (<=1kb)	16	29827528	29833816	79447	0	ENSG00000280789	PAGR1	PAXIP1 associated glutamate rich protein 1
chr16	29984962	29985394	433	420	9.17403	45.9825	42.0926	Promoter (<=1kb)	16	29985188	29999719	9344	0	ENSG00000149930	TAOK2	TAO kinase 2
chr16	30006616	30007625	1010	740	12.4084	78.2075	74.0925	Promoter (<=1kb)	16	30007531	30017112	283899	0	ENSG00000169592	INO80E	INO80 complex subunit E
chr16	30366465	30366713	249	133	4.19864	16.9336	13.3786	Promoter (<=1kb)	16	30362087	30366682	10421	0	ENSG00000169217	CD2BP2	CD2 cytoplasmic tail binding protein 2
chr16	30456834	30457066	233	62	3.80282	9.6386	6.26132	Promoter (<=1kb)	16	30454952	30457224	22928	158	ENSG00000179918	SEPHS2	selenophosphate synthetase 2
chr16	30537662	30537878	217	49	3.79887	8.32163	4.99726	Promoter (<=1kb)	16	30535322	30537910	79724	32	ENSG00000169957	ZNF768	zinc finger protein 768
chr16	30538733	30538943	211	44	3.25268	7.76719	4.46254	Promoter (<=1kb)	16	30535322	30538095	79724	-638	ENSG00000169957	ZNF768	zinc finger protein 768
chr16	30546033	30546527	495	4886	61.6845	494.178	488.638	Promoter (<=1kb)	16	30542779	30546194	65988	0	ENSG00000169955	ZNF747	zinc finger protein 747
chr16	30569395	30570033	639	1203	14.601	124.707	120.318	Promoter (<=1kb)	16	30565085	30569642	92595	0	ENSG00000169951	ZNF764	zinc finger protein 764
chr16	30582973	30583420	448	45	3.19954	7.81482	4.50924	Promoter (<=1kb)	16	30581019	30583728	146542	308	ENSG00000229809	ZNF688	zinc finger protein 688
chr16	30596742	30597211	470	548	9.92954	58.8337	54.8472	Promoter (<=1kb)	16	30590294	30597092	146540	0	ENSG00000197162	ZNF785	zinc finger protein 785
chr16	30621243	30621883	641	228	6.51697	26.5525	22.8538	Promoter (<=1kb)	16	30613879	30621707	115509	0	ENSG00000156853	ZNF689	zinc finger protein 689
chr16	30661749	30662218	470	1263	15.9144	130.726	126.301	Promoter (<=1kb)	16	30662241	30667734	78994	-23	ENSG00000156858	PRR14	proline rich 14
chr16	30709319	30710058	740	1438	19.1547	148.343	143.821	Promoter (<=1kb)	16	30709914	30732797	10847	0	ENSG00000080603	SRCAP	Snf2 related CREBBP activator protein
chr16	30773420	30774025	606	1622	15.7109	166.894	162.278	Promoter (<=1kb)	16	30768744	30773519	90835	0	ENSG00000196118	CCDC189	coiled-coil domain containing 189
chr16	30786562	30786892	331	321	8.86231	35.9143	32.1134	3' UTR	16	30779572	30784104	9810	6990	ENSG00000103549	RNF40	ring finger protein 40
chr16	30886286	30886832	547	40	3.34372	7.37432	4.09353	Promoter (<=1kb)	16	30886587	30886644	100616231	0	ENSG00000265991	MIR4519	microRNA 4519
chr16	30933797	30934796	1000	2242	20.7361	229.169	224.283	Promoter (<=1kb)	16	30930640	30934590	283932	0	ENSG00000260852	FBXL19-AS1	FBXL19 antisense RNA 1
chr16	31084577	31085186	610	36	3.32526	6.88253	3.62289	Promoter (<=1kb)	16	31072164	31084823	79759	0	ENSG00000167394	ZNF668	zinc finger protein 668
chr16	31105992	31106225	234	111	4.66924	14.6362	11.1263	Promoter (<=1kb)	16	31094745	31106276	339105	51	ENSG00000151006	PRSS53	serine protease 53
chr16	31128827	31129235	409	418	8.79429	45.7498	41.8615	Promoter (<=1kb)	16	31128985	31142714	84148	0	ENSG00000103510	KAT8	lysine acetyltransferase 8
chr16	31191476	31191962	487	637	12.6083	67.7907	63.7425	Promoter (<=1kb)	16	31191431	31206192	2521	45	ENSG00000089280	FUS	FUS RNA binding protein
chr16	31470641	31471196	556	1012	14.0067	105.51	101.235	Promoter (<=1kb)	16	31470789	31478487	79798	0	ENSG00000140691	ARMC5	armadillo repeat containing 5
chr16	31724707	31725122	416	905	14.095	94.7272	90.5147	Promoter (<=1kb)	16	31724566	31771207	124411	141	ENSG00000197302	ZNF720	zinc finger protein 720
chr16	31885241	31885670	430	781	17.6427	82.2874	78.1476	Promoter (<=1kb)	16	31885079	31928629	10308	162	ENSG00000185947	ZNF267	zinc finger protein 267
chr16	32102199	32102509	311	60	5.57014	9.37392	6.00505	Distal Intergenic	16	32162609	32163874	440362	61365	NA	NA	NA
chr16	32102947	32103334	388	142	8.54088	17.8574	14.2859	Distal Intergenic	16	32162609	32163874	440362	60540	NA	NA	NA
chr16	32103748	32104181	434	33	4.45611	6.61197	3.36306	Distal Intergenic	16	32162609	32163874	440362	59693	NA	NA	NA
chr16	32104616	32107220	2605	69	5.54458	10.4009	6.99781	Distal Intergenic	16	32162609	32163874	440362	56654	NA	NA	NA
chr16	32107826	32108049	224	25	4.08477	5.75617	2.55965	Distal Intergenic	16	32162609	32163874	440362	55825	NA	NA	NA
chr16	32108762	32109042	281	99	7.05551	13.4379	9.95372	Distal Intergenic	16	32162609	32163874	440362	54832	NA	NA	NA
chr16	32109250	32109516	267	51	5.05607	8.50798	5.17189	Distal Intergenic	16	32162609	32163874	440362	54358	NA	NA	NA
chr16	32111343	32111623	281	50	4.82829	8.43331	5.09987	Distal Intergenic	16	32162609	32163874	440362	52251	NA	NA	NA
chr16	32114771	32115006	236	77	6.21492	11.1914	7.76649	Distal Intergenic	16	32162609	32163874	440362	48868	NA	NA	NA
chr16	32115499	32115755	257	69	5.54458	10.4009	6.99781	Distal Intergenic	16	32162609	32163874	440362	48119	NA	NA	NA
chr16	32118133	32118732	600	177	9.65491	21.3682	17.7406	Distal Intergenic	16	32162609	32163874	440362	45142	NA	NA	NA
chr16	32135184	32135417	234	50	5.1988	8.42311	5.09023	Distal Intergenic	16	32162609	32163874	440362	28457	NA	NA	NA
chr16	32141021	32141406	386	50	5.1988	8.42311	5.09023	Distal Intergenic	16	32162609	32163874	440362	22468	NA	NA	NA
chr16	32147606	32148121	516	79	6.31282	11.3568	7.92535	Distal Intergenic	16	32162609	32163874	440362	15753	NA	NA	NA
chr16	32149738	32149985	248	60	5.57014	9.37392	6.00505	Distal Intergenic	16	32162609	32163874	440362	13889	NA	NA	NA
chr16	32536654	32536865	212	18	3.71343	4.93715	1.80582	Distal Intergenic	16	32684849	32687448	24150	150583	ENSG00000183632	TP53TG3	TP53 target 3
chr16	32554027	32554287	261	33	4.45611	6.61197	3.36306	Distal Intergenic	16	32684849	32687448	24150	133161	ENSG00000183632	TP53TG3	TP53 target 3
chr16	32556332	32556603	272	25	4.08477	5.75617	2.55965	Distal Intergenic	16	32684849	32687448	24150	130845	ENSG00000183632	TP53TG3	TP53 target 3
chr16	32559746	32560071	326	25	4.08477	5.75617	2.55965	Distal Intergenic	16	32684849	32687448	24150	127377	ENSG00000183632	TP53TG3	TP53 target 3
chr16	32790131	32790419	289	79	6.31282	11.3568	7.92535	Distal Intergenic	16	32888797	32891922	386757	101503	ENSG00000214617	SLC6A10P	solute carrier family 6 member 10, pseudogene
chr16	32798031	32798294	264	99	7.05551	13.4379	9.95372	Distal Intergenic	16	32888797	32891922	386757	93628	ENSG00000214617	SLC6A10P	solute carrier family 6 member 10, pseudogene
chr16	32816716	32816927	212	60	5.57014	9.37392	6.00505	Distal Intergenic	16	32888797	32891922	386757	74995	ENSG00000214617	SLC6A10P	solute carrier family 6 member 10, pseudogene
chr16	32817416	32817794	379	34	4.04623	6.72502	3.47084	Distal Intergenic	16	32888797	32891922	386757	74128	ENSG00000214617	SLC6A10P	solute carrier family 6 member 10, pseudogene
chr16	32827371	32827640	270	51	4.8452	8.46344	5.12897	Distal Intergenic	16	32888797	32891922	386757	64282	ENSG00000214617	SLC6A10P	solute carrier family 6 member 10, pseudogene
chr16	32830770	32831004	235	113	7.13724	14.9056	11.3907	Distal Intergenic	16	32888797	32891922	386757	60918	ENSG00000214617	SLC6A10P	solute carrier family 6 member 10, pseudogene
chr16	32831220	32831534	315	50	5.1988	8.42311	5.09023	Distal Intergenic	16	32888797	32891922	386757	60388	ENSG00000214617	SLC6A10P	solute carrier family 6 member 10, pseudogene
chr16	32831941	32832168	228	74	6.01152	10.8455	7.4308	Distal Intergenic	16	32888797	32891922	386757	59754	ENSG00000214617	SLC6A10P	solute carrier family 6 member 10, pseudogene
chr16	32832554	32833307	754	102	6.98662	13.7524	10.2624	Distal Intergenic	16	32888797	32891922	386757	58615	ENSG00000214617	SLC6A10P	solute carrier family 6 member 10, pseudogene
chr16	32843960	32844586	627	128	5.82578	16.4275	12.8827	Distal Intergenic	16	32888797	32891922	386757	47336	ENSG00000214617	SLC6A10P	solute carrier family 6 member 10, pseudogene
chr16	32844928	32845862	935	49	4.26091	8.26539	4.94246	Distal Intergenic	16	32888797	32891922	386757	46060	ENSG00000214617	SLC6A10P	solute carrier family 6 member 10, pseudogene
chr16	32847026	32847245	220	42	3.60541	7.58881	4.29194	Distal Intergenic	16	32888797	32891922	386757	44677	ENSG00000214617	SLC6A10P	solute carrier family 6 member 10, pseudogene
chr16	32848370	32848722	353	76	4.30315	11.0397	7.61984	Distal Intergenic	16	32888797	32891922	386757	43200	ENSG00000214617	SLC6A10P	solute carrier family 6 member 10, pseudogene
chr16	33043481	33043843	363	26	2.88361	5.89262	2.69032	Intron (uc021thc.2/uc021thc.2, intron 6 of 8)	16	32888797	32896463	386757	-147018	ENSG00000214617	SLC6A10P	solute carrier family 6 member 10, pseudogene
chr16	33045137	33045738	602	40	4.71272	7.31344	4.03467	Intron (uc021thc.2/uc021thc.2, intron 6 of 8)	16	32888797	32896463	386757	-148674	ENSG00000214617	SLC6A10P	solute carrier family 6 member 10, pseudogene
chr16	33046657	33047492	836	276	12.6257	31.4102	27.6537	Intron (uc021thc.2/uc021thc.2, intron 6 of 8)	16	32888797	32896463	386757	-150194	ENSG00000214617	SLC6A10P	solute carrier family 6 member 10, pseudogene
chr16	33048783	33050657	1875	177	9.65491	21.3682	17.7406	Intron (uc021thc.2/uc021thc.2, intron 6 of 8)	16	32888797	32896463	386757	-152320	ENSG00000214617	SLC6A10P	solute carrier family 6 member 10, pseudogene
chr16	33051517	33051748	232	79	6.31282	11.3568	7.92535	Intron (uc021thc.2/uc021thc.2, intron 6 of 8)	16	33205585	33208179	24150	-153837	ENSG00000183632	TP53TG3	TP53 target 3
chr16	33082837	33083350	514	131	8.16954	16.7228	13.1715	Intron (uc021thc.2/uc021thc.2, intron 6 of 8)	16	33205585	33208179	24150	-122235	ENSG00000183632	TP53TG3	TP53 target 3
chr16	33091235	33091573	339	42	4.82745	7.50176	4.20799	Intron (uc021thc.2/uc021thc.2, intron 6 of 8)	16	33205585	33208179	24150	-114012	ENSG00000183632	TP53TG3	TP53 target 3
chr16	33521080	33521466	387	142	8.54088	17.8574	14.2859	Distal Intergenic	16	33298268	33298702	390705	-222378	NA	LOC390705	protein phosphatase 2 regulatory subunit B'', beta pseudogene
chr16	33521718	33521931	214	60	5.57014	9.37392	6.00505	Distal Intergenic	16	33298268	33298702	390705	-223016	NA	LOC390705	protein phosphatase 2 regulatory subunit B'', beta pseudogene
chr16	33524608	33525060	453	33	4.45611	6.61197	3.36306	Distal Intergenic	16	33298268	33298702	390705	-225906	NA	LOC390705	protein phosphatase 2 regulatory subunit B'', beta pseudogene
chr16	33535485	33536603	1119	89	6.68417	12.3857	8.92713	Distal Intergenic	16	33298268	33298702	390705	-236783	NA	LOC390705	protein phosphatase 2 regulatory subunit B'', beta pseudogene
chr16	33537163	33537442	280	42	4.82745	7.50176	4.20799	Distal Intergenic	16	33298268	33298702	390705	-238461	NA	LOC390705	protein phosphatase 2 regulatory subunit B'', beta pseudogene
chr16	33537751	33537996	246	50	5.1988	8.42311	5.09023	Distal Intergenic	16	33298268	33298702	390705	-239049	NA	LOC390705	protein phosphatase 2 regulatory subunit B'', beta pseudogene
chr16	33547762	33547999	238	50	5.1988	8.42311	5.09023	Distal Intergenic	16	33298268	33298702	390705	-249060	NA	LOC390705	protein phosphatase 2 regulatory subunit B'', beta pseudogene
chr16	33585057	33585590	534	99	7.05551	13.4379	9.95372	Exon (uc031qwb.1/uc031qwb.1, exon 3 of 3)	16	33298268	33298702	390705	-286355	NA	LOC390705	protein phosphatase 2 regulatory subunit B'', beta pseudogene
chr16	33586472	33586693	222	50	5.1988	8.42311	5.09023	Exon (uc031qwb.1/uc031qwb.1, exon 3 of 3)	16	33298268	33298702	390705	-287770	NA	LOC390705	protein phosphatase 2 regulatory subunit B'', beta pseudogene
chr16	33915746	33915993	248	60	5.57014	9.37392	6.00505	Distal Intergenic	16	33961052	33962503	649159	46510	NA	NA	NA
chr16	33918452	33918731	280	79	5.85261	11.331	7.90217	Distal Intergenic	16	33961052	33962503	649159	43772	NA	NA	NA
chr16	33918953	33919400	448	36	3.8905	6.95674	3.69448	Distal Intergenic	16	33961052	33962503	649159	43103	NA	NA	NA
chr16	33923279	33923586	308	30	4.26085	6.29423	3.06986	Distal Intergenic	16	33961052	33962503	649159	38917	NA	NA	NA
chr16	33969705	33970108	404	66	3.59484	10.0072	6.61864	Distal Intergenic	16	33961052	33962503	649159	-7202	NA	NA	NA
chr16	33971039	33971678	640	74	3.0585	10.9066	7.48906	Distal Intergenic	16	33961052	33962503	649159	-8536	NA	NA	NA
chr16	33972152	33973490	1339	346	11.2814	38.5206	34.6952	Distal Intergenic	16	33961052	33962503	649159	-9649	NA	NA	NA
chr16	33973699	33975882	2184	115	5.28539	15.026	11.5075	Distal Intergenic	16	33961052	33962503	649159	-11196	NA	NA	NA
chr16	33976094	33976690	597	89	6.00187	12.3888	8.93014	Distal Intergenic	16	33961052	33962503	649159	-13591	NA	NA	NA
chr16	33976942	33977238	297	53	4.81094	8.72252	5.37882	Distal Intergenic	16	33961052	33962503	649159	-14439	NA	NA	NA
chr16	33977511	33977824	314	80	5.51468	11.4526	8.01916	Distal Intergenic	16	33961052	33962503	649159	-15008	NA	NA	NA
chr16	33979102	33979561	460	51	4.8452	8.46344	5.12897	Distal Intergenic	16	33961052	33962503	649159	-16599	NA	NA	NA
chr16	33981696	33982138	443	19	2.71345	5.07887	1.93843	Distal Intergenic	16	33961052	33962503	649159	-19193	NA	NA	NA
chr16	33982582	33985197	2616	135	6.63674	17.0586	13.5013	Distal Intergenic	16	33961052	33962503	649159	-20079	NA	NA	NA
chr16	33985559	33986591	1033	97	6.03989	13.2651	9.78669	Distal Intergenic	16	33961052	33962503	649159	-23056	NA	NA	NA
chr16	33986952	33987265	314	154	8.91222	19.0102	15.4191	Distal Intergenic	16	33961052	33962503	649159	-24449	NA	NA	NA
chr16	33987482	33988744	1263	116	6.17903	15.2003	11.6791	Distal Intergenic	16	33961052	33962503	649159	-24979	NA	NA	NA
chr16	33995484	33995723	240	36	3.8905	6.95674	3.69448	Distal Intergenic	16	33961052	33962503	649159	-32981	NA	NA	NA
chr16	33996914	33997247	334	35	4.38192	6.76473	3.50988	Distal Intergenic	16	33961052	33962503	649159	-34411	NA	NA	NA
chr16	33998123	33998396	274	15	2.52987	4.57733	1.50107	Distal Intergenic	16	33961052	33962503	649159	-35620	NA	NA	NA
chr16	34000156	34000379	224	55	5.11395	8.93765	5.58691	Distal Intergenic	16	33961052	33962503	649159	-37653	NA	NA	NA
chr16	34003925	34004245	321	43	3.6337	7.65869	4.35847	Distal Intergenic	16	33961052	33962503	649159	-41422	NA	NA	NA
chr16	34007760	34008006	247	99	7.05551	13.4379	9.95372	Distal Intergenic	16	33961052	33962503	649159	-45257	NA	NA	NA
chr16	34014874	34015096	223	42	4.82745	7.50176	4.20799	Distal Intergenic	16	33961052	33962503	649159	-52371	NA	NA	NA
chr16	34015577	34016645	1069	65	5.68114	9.91357	6.52868	Distal Intergenic	16	33961052	33962503	649159	-53074	NA	NA	NA
chr16	34191442	34191840	399	21	3.69639	5.35696	2.19874	Distal Intergenic	16	34403802	34404762	606551	212922	NA	UBE2MP1	ubiquitin conjugating enzyme E2 M pseudogene 1
chr16	35229146	35229354	209	151	8.774	18.7699	15.1831	Distal Intergenic	16	34980923	34990995	400533	248223	ENSG00000261122	LINC02167	long intergenic non-protein coding RNA 2167
chr16	35234704	35234914	211	33	4.45611	6.61197	3.36306	Distal Intergenic	16	34980923	34990995	400533	253781	ENSG00000261122	LINC02167	long intergenic non-protein coding RNA 2167
chr16	35243756	35244116	361	36	3.8905	6.95674	3.69448	Distal Intergenic	16	34980923	34990995	400533	262833	ENSG00000261122	LINC02167	long intergenic non-protein coding RNA 2167
chr16	35253644	35254006	363	60	5.57014	9.37392	6.00505	Distal Intergenic	16	34980923	34990995	400533	272721	ENSG00000261122	LINC02167	long intergenic non-protein coding RNA 2167
chr16	46385930	46387547	1618	1047	3.07877	109.054	104.759	Distal Intergenic	16	46503249	46552312	124149	164765	NA	ANKRD26P1	ankyrin repeat domain 26 pseudogene 1
chr16	46388227	46388806	580	274	1.9798	31.213	27.4597	Distal Intergenic	16	46503249	46552312	124149	163506	NA	ANKRD26P1	ankyrin repeat domain 26 pseudogene 1
chr16	46389566	46389839	274	1026	2.54138	106.979	102.696	Distal Intergenic	16	46503249	46552312	124149	162473	NA	ANKRD26P1	ankyrin repeat domain 26 pseudogene 1
chr16	46390898	46392305	1408	1344	2.2197	138.944	134.472	Distal Intergenic	16	46503249	46552312	124149	160007	NA	ANKRD26P1	ankyrin repeat domain 26 pseudogene 1
chr16	46392986	46393531	546	725	2.51919	76.627	72.5227	Distal Intergenic	16	46503249	46552312	124149	158781	NA	ANKRD26P1	ankyrin repeat domain 26 pseudogene 1
chr16	46393929	46394270	342	837	2.27641	87.9021	83.7289	Distal Intergenic	16	46503249	46552312	124149	158042	NA	ANKRD26P1	ankyrin repeat domain 26 pseudogene 1
chr16	46394494	46394888	395	544	1.97821	58.4335	54.4504	Distal Intergenic	16	46503249	46552312	124149	157424	NA	ANKRD26P1	ankyrin repeat domain 26 pseudogene 1
chr16	46395109	46395479	371	1568	2.76637	161.477	156.888	Distal Intergenic	16	46503249	46552312	124149	156833	NA	ANKRD26P1	ankyrin repeat domain 26 pseudogene 1
chr16	46395728	46395950	223	184	1.75582	22.0682	18.4295	Distal Intergenic	16	46503249	46552312	124149	156362	NA	ANKRD26P1	ankyrin repeat domain 26 pseudogene 1
chr16	46398090	46398801	712	1376	3.16273	142.115	137.625	Distal Intergenic	16	46503249	46552312	124149	153511	NA	ANKRD26P1	ankyrin repeat domain 26 pseudogene 1
chr16	46399454	46399716	263	1314	2.97057	135.896	131.44	Distal Intergenic	16	46503249	46552312	124149	152596	NA	ANKRD26P1	ankyrin repeat domain 26 pseudogene 1
chr16	46401774	46402224	451	947	2.33087	99.0243	94.7873	Distal Intergenic	16	46503249	46552312	124149	150088	NA	ANKRD26P1	ankyrin repeat domain 26 pseudogene 1
chr16	46403515	46403836	322	1860	2.81491	190.786	186.063	Distal Intergenic	16	46503249	46552312	124149	148476	NA	ANKRD26P1	ankyrin repeat domain 26 pseudogene 1
chr16	46404106	46405588	1483	1055	2.447	109.824	105.523	Distal Intergenic	16	46503249	46552312	124149	146724	NA	ANKRD26P1	ankyrin repeat domain 26 pseudogene 1
chr16	46405796	46407079	1284	805	2.06995	84.6601	80.5062	Distal Intergenic	16	46503249	46552312	124149	145233	NA	ANKRD26P1	ankyrin repeat domain 26 pseudogene 1
chr16	46407354	46407828	475	269	1.81345	30.6571	26.9089	Distal Intergenic	16	46503249	46552312	124149	144484	NA	ANKRD26P1	ankyrin repeat domain 26 pseudogene 1
chr16	46408215	46408684	470	1251	2.62246	129.58	125.162	Distal Intergenic	16	46503249	46552312	124149	143628	NA	ANKRD26P1	ankyrin repeat domain 26 pseudogene 1
chr16	46412968	46413403	436	209	1.88122	24.5778	20.9045	Distal Intergenic	16	46503249	46552312	124149	138909	NA	ANKRD26P1	ankyrin repeat domain 26 pseudogene 1
chr16	46414893	46415254	362	93	2.81465	12.7867	9.31892	Distal Intergenic	16	46503249	46552312	124149	137058	NA	ANKRD26P1	ankyrin repeat domain 26 pseudogene 1
chr16	46416703	46417523	821	560	4.15852	60.0605	56.0654	Distal Intergenic	16	46503249	46552312	124149	134789	NA	ANKRD26P1	ankyrin repeat domain 26 pseudogene 1
chr16	46419503	46419837	335	44	1.86331	7.73381	4.43132	Distal Intergenic	16	46503249	46552312	124149	132475	NA	ANKRD26P1	ankyrin repeat domain 26 pseudogene 1
chr16	46420268	46420526	259	1027	3.33979	107.07	102.786	Distal Intergenic	16	46503249	46552312	124149	131786	NA	ANKRD26P1	ankyrin repeat domain 26 pseudogene 1
chr16	46420806	46421051	246	977	4.34425	101.98	97.7259	Distal Intergenic	16	46503249	46552312	124149	131261	NA	ANKRD26P1	ankyrin repeat domain 26 pseudogene 1
chr16	46423666	46424288	623	344	2.33294	38.2733	34.4498	Distal Intergenic	16	46503249	46552312	124149	128024	NA	ANKRD26P1	ankyrin repeat domain 26 pseudogene 1
chr16	46424640	46425068	429	408	2.26304	44.7796	40.8996	Distal Intergenic	16	46503249	46552312	124149	127244	NA	ANKRD26P1	ankyrin repeat domain 26 pseudogene 1
chr16	46426689	46427764	1076	678	4.11249	71.9104	67.8354	Distal Intergenic	16	46503249	46552312	124149	124548	NA	ANKRD26P1	ankyrin repeat domain 26 pseudogene 1
chr16	46432642	46432901	260	716	2.26848	75.7115	71.612	Distal Intergenic	16	46503249	46552312	124149	119411	NA	ANKRD26P1	ankyrin repeat domain 26 pseudogene 1
chr16	46433999	46434472	474	154	2.08586	19.0706	15.4786	Distal Intergenic	16	46503249	46552312	124149	117840	NA	ANKRD26P1	ankyrin repeat domain 26 pseudogene 1
chr16	46435299	46435509	211	543	2.56459	58.3519	54.369	Distal Intergenic	16	46503249	46552312	124149	116803	NA	ANKRD26P1	ankyrin repeat domain 26 pseudogene 1
chr16	46458049	46458516	468	130	7.8444	16.6369	13.0879	Distal Intergenic	16	46503249	46552312	124149	93796	NA	ANKRD26P1	ankyrin repeat domain 26 pseudogene 1
chr16	46465825	46466055	231	79	6.31282	11.3568	7.92535	Distal Intergenic	16	46503249	46552312	124149	86257	NA	ANKRD26P1	ankyrin repeat domain 26 pseudogene 1
chr16	46472375	46472637	263	107	6.77671	14.2492	10.7479	Distal Intergenic	16	46503249	46552312	124149	79675	NA	ANKRD26P1	ankyrin repeat domain 26 pseudogene 1
chr16	46477181	46477436	256	154	8.91222	19.0102	15.4191	Distal Intergenic	16	46503249	46552312	124149	74876	NA	ANKRD26P1	ankyrin repeat domain 26 pseudogene 1
chr16	46479948	46480387	440	154	8.91222	19.0102	15.4191	Distal Intergenic	16	46503249	46552312	124149	71925	NA	ANKRD26P1	ankyrin repeat domain 26 pseudogene 1
chr16	46491182	46491560	379	33	4.45611	6.61197	3.36306	Distal Intergenic	16	46503249	46552312	124149	60752	NA	ANKRD26P1	ankyrin repeat domain 26 pseudogene 1
chr16	46492218	46492492	275	97	6.46868	13.2561	9.77802	Distal Intergenic	16	46503249	46552312	124149	59820	NA	ANKRD26P1	ankyrin repeat domain 26 pseudogene 1
chr16	46496381	46496733	353	33	4.45611	6.61197	3.36306	Distal Intergenic	16	46503249	46552312	124149	55579	NA	ANKRD26P1	ankyrin repeat domain 26 pseudogene 1
chr16	46655018	46655423	406	397	7.95837	43.5881	39.7189	Promoter (<=1kb)	16	46614468	46655311	79801	0	ENSG00000171241	SHCBP1	SHC binding and spindle associated 1
chr16	46864865	46865170	306	157	5.05588	19.3897	15.7925	Promoter (<=1kb)	16	46835959	46865074	388272	0	ENSG00000155330	C16orf87	chromosome 16 open reading frame 87
chr16	47177381	47177788	408	77	5.01483	11.1431	7.72071	Promoter (<=1kb)	16	47115431	47177936	81831	148	ENSG00000171208	NETO2	neuropilin and tolloid like 2
chr16	47494793	47495487	695	248	6.84822	28.5836	24.8587	Promoter (<=1kb)	16	47495210	47581459	5257	0	ENSG00000102893	PHKB	phosphorylase kinase regulatory subunit beta
chr16	47962990	47963206	217	18	3.71343	4.93715	1.80582	Distal Intergenic	16	48116884	48180385	94160	217179	ENSG00000140798	ABCC12	ATP binding cassette subfamily C member 12
chr16	48418395	48419519	1125	523	12.7439	56.3249	52.3563	Promoter (<=1kb)	16	48394446	48419229	6477	0	ENSG00000196470	SIAH1	siah E3 ubiquitin protein ligase 1
chr16	48643637	48644374	738	657	14.7465	69.8359	65.7744	Promoter (<=1kb)	16	48572637	48644120	9683	0	ENSG00000102921	N4BP1	NEDD4 binding protein 1
chr16	50187132	50187436	305	190	6.73194	22.7025	19.0551	Promoter (<=1kb)	16	50187658	50269217	64282	-222	ENSG00000121274	PAPD5	poly(A) RNA polymerase D5, non-canonical
chr16	50775744	50775950	207	55	2.87421	8.91282	5.56263	Promoter (<=1kb)	16	50775961	50811852	1540	-11	ENSG00000083799	CYLD	CYLD lysine 63 deubiquitinase
chr16	53164422	53164803	382	348	8.84367	38.6531	34.8269	Intron (uc002egy.3/80205, intron 1 of 38)	16	53189838	53361414	80205	-25035	ENSG00000177200	CHD9	chromodomain helicase DNA binding protein 9
chr16	53165325	53165719	395	456	14.7506	49.5461	45.6282	Intron (uc002egy.3/80205, intron 1 of 38)	16	53189838	53361414	80205	-24119	ENSG00000177200	CHD9	chromodomain helicase DNA binding protein 9
chr16	53468245	53468599	355	96	4.3932	13.132	9.65575	Promoter (<=1kb)	16	53468351	53525560	5934	0	ENSG00000103479	RBL2	RB transcriptional corepressor like 2
chr16	53737627	53737959	333	322	7.88192	36.0372	32.2347	Promoter (<=1kb)	16	53633818	53737771	23322	0	ENSG00000103494	RPGRIP1L	RPGRIP1 like
chr16	54667858	54668088	231	131	8.16954	16.7228	13.1715	Distal Intergenic	16	54952777	54962690	643911	294602	NA	CRNDE	colorectal neoplasia differentially expressed
chr16	56352156	56352486	331	441	9.43246	48.0471	44.1415	Intron (uc002eit.4/2775, intron 3 of 7)	16	56279432	56279535	100500891	72724	ENSG00000265281	MIR3935	microRNA 3935
chr16	56485032	56485409	378	316	6.13143	35.4189	31.6215	Promoter (<=1kb)	16	56463048	56485261	11051	0	ENSG00000167005	NUDT21	nudix hydrolase 21
chr16	56553572	56554007	436	192	6.49937	22.9356	19.2837	Promoter (<=1kb)	16	56518259	56554008	583	1	ENSG00000125124	BBS2	Bardet-Biedl syndrome 2
chr16	56965650	56966231	582	523	11.1591	56.3334	52.3649	Promoter (<=1kb)	16	56966002	56971325	9709	0	ENSG00000051108	HERPUD1	homocysteine inducible ER protein with ubiquitin like domain 1
chr16	57220078	57220471	394	587	11.703	62.7415	58.7274	Promoter (<=1kb)	16	57220241	57272947	89970	0	ENSG00000159579	RSPRY1	ring finger and SPRY domain containing 1
chr16	57481186	57481697	512	3651	42.1727	370.476	365.18	Promoter (<=1kb)	16	57481337	57488216	57017	0	ENSG00000088682	COQ9	coenzyme Q9
chr16	57512993	57513340	348	138	5.48164	17.4578	13.8936	Promoter (<=1kb)	16	57505870	57513679	55715	339	ENSG00000125170	DOK4	docking protein 4
chr16	57769065	57769453	389	146	5.60099	18.1952	14.6174	Promoter (<=1kb)	16	57769660	57791162	10300	-207	ENSG00000140854	KATNB1	katanin regulatory subunit B1
chr16	58549363	58549603	241	77	4.45955	11.1472	7.72421	Promoter (<=1kb)	16	58549383	58550983	79918	0	ENSG00000103037	SETD6	SET domain containing 6
chr16	58663541	58663940	400	491	9.24006	53.1415	49.1963	Promoter (<=1kb)	16	58553850	58663790	23019	0	ENSG00000125107	CNOT1	CCR4-NOT transcription complex subunit 1
chr16	66784929	66785865	937	980	15.5054	102.294	98.0374	Promoter (<=1kb)	16	66754799	66785525	1783	0	ENSG00000135720	DYNC1LI2	dynein cytoplasmic 1 light intermediate chain 2
chr16	66864582	66864932	351	315	9.93669	35.3241	31.5279	Promoter (<=1kb)	16	66836781	66864879	8883	0	ENSG00000159593	NAE1	NEDD8 activating enzyme E1 subunit 1
chr16	67063294	67063534	241	52	3.62236	8.61563	5.27452	Promoter (<=1kb)	16	67063050	67134958	865	244	ENSG00000067955	CBFB	core-binding factor beta subunit
chr16	67184684	67184909	226	73	3.90359	10.7395	7.3276	Promoter (<=1kb)	16	67182005	67184902	84752	0	ENSG00000237172	B3GNT9	UDP-GlcNAc:betaGal beta-1,3-N-acetylglucosaminyltransferase 9
chr16	67225940	67226340	401	239	6.71901	27.6868	23.9726	Promoter (<=1kb)	16	67226068	67232821	1874	0	ENSG00000205250	E2F4	E2F transcription factor 4
chr16	67260752	67260990	239	130	4.5628	16.5505	13.0026	Promoter (<=1kb)	16	67241042	67260901	26231	0	ENSG00000125122	LRRC29	leucine rich repeat containing 29
chr16	67465056	67465284	229	68	4.12017	10.251	6.85566	Promoter (<=1kb)	16	67465036	67471454	3291	20	ENSG00000176387	HSD11B2	hydroxysteroid 11-beta dehydrogenase 2
chr16	67596126	67597036	911	1201	20.6884	124.518	120.13	Promoter (<=1kb)	16	67596310	67673088	10664	0	ENSG00000102974	CTCF	CCCTC-binding factor
chr16	67840219	67840648	430	1095	14.2204	113.901	109.575	Promoter (<=1kb)	16	67757005	67840555	57610	0	ENSG00000141084	RANBP10	RAN binding protein 10
chr16	67876372	67876591	220	19	2.59391	5.05682	1.92113	Promoter (<=1kb)	16	67876213	67878098	57215	159	ENSG00000168286	THAP11	THAP domain containing 11
chr16	67880268	67881035	768	135	5.1354	17.148	13.5893	Promoter (<=1kb)	16	67880819	67902788	10204	0	ENSG00000102898	NUTF2	nuclear transport factor 2
chr16	67926974	67927558	585	918	14.8593	96.0767	91.8565	Promoter (<=1kb)	16	67927175	67943991	5681	0	ENSG00000159792	PSKH1	protein serine kinase H1
chr16	67969658	67969878	221	42	3.42081	7.58422	4.28749	Promoter (<=1kb)	16	67964629	67970780	5699	902	ENSG00000205220	PSMB10	proteasome subunit beta 10
chr16	68056937	68057261	325	161	5.71219	19.7148	16.1123	Promoter (<=1kb)	16	68056847	68113226	54920	90	ENSG00000167264	DUS2	dihydrouridine synthase 2
chr16	68344645	68345016	372	441	9.43246	48.0471	44.1415	Promoter (<=1kb)	16	68344877	68391169	54496	0	ENSG00000132600	PRMT7	protein arginine methyltransferase 7
chr16	68563959	68564237	279	70	3.08978	10.4618	7.05674	Promoter (<=1kb)	16	68564048	68601039	146198	0	ENSG00000184939	ZFP90	ZFP90 zinc finger protein
chr16	68573043	68573442	400	655	12.5389	69.6503	65.5898	Promoter (<=1kb)	16	68573116	68601039	146198	0	ENSG00000184939	ZFP90	ZFP90 zinc finger protein
chr16	68877256	68877812	557	3295	47.1543	334.72	329.512	Promoter (<=1kb)	16	68877509	68901883	79613	0	ENSG00000103047	TANGO6	transport and golgi organization 6 homolog
chr16	69166220	69166578	359	330	9.61553	36.8714	33.0614	Promoter (<=1kb)	16	69151912	69166493	54921	0	ENSG00000168802	CHTF8	chromosome transmission fidelity factor 8
chr16	69220972	69221722	751	112	5.46167	14.7317	11.219	Promoter (<=1kb)	16	69221050	69342955	6645	0	ENSG00000168807	SNTB2	syntrophin beta 2
chr16	69364267	69364845	579	337	10.3423	37.543	33.726	Promoter (<=1kb)	16	69362524	69364498	64146	0	ENSG00000258429	PDF	peptide deformylase, mitochondrial
chr16	69373276	69373536	261	136	4.93926	17.2144	13.6542	Promoter (<=1kb)	16	69373415	69377013	51388	0	ENSG00000132603	NIP7	NIP7, nucleolar pre-rRNA processing protein
chr16	69419621	69420051	431	661	11.3852	70.222	66.158	Promoter (<=1kb)	16	69389464	69419891	7014	0	ENSG00000132604	TERF2	telomeric repeat binding factor 2
chr16	69788647	69789001	355	389	7.20146	42.811	38.9479	Promoter (<=1kb)	16	69775757	69788871	28987	0	ENSG00000141101	NOB1	NIN1 (RPN12) binding protein 1 homolog
chr16	69924365	69924588	224	68	5.43182	10.1973	6.80368	Intron (uc031qwu.1/11060, intron 8 of 8)	16	69951486	69975644	11060	-26898	ENSG00000198373	WWP2	WW domain containing E3 ubiquitin protein ligase 2
chr16	70285607	70286005	399	166	5.09335	20.2459	16.6349	Promoter (<=1kb)	16	70284134	70285833	118460	0	ENSG00000223496	EXOSC6	exosome component 6
chr16	70557204	70557746	543	513	11.8921	55.2866	51.3253	Promoter (<=1kb)	16	70557691	70611571	23450	0	ENSG00000189091	SF3B3	splicing factor 3b subunit 3
chr16	70834826	70835212	387	416	7.67973	45.4857	41.6005	Promoter (<=1kb)	16	70721342	70835061	55697	0	ENSG00000103043	VAC14	Vac14, PIKFYVE complex component
chr16	71842477	71842935	459	732	11.8477	77.3816	73.2717	Promoter (<=1kb)	16	71762905	71842976	164	41	ENSG00000166747	AP1G1	adaptor related protein complex 1 gamma 1 subunit
chr16	71879777	71880051	275	99	4.28359	13.3887	9.90778	Promoter (<=1kb)	16	71879894	71891236	342371	0	ENSG00000224470	ATXN1L	ataxin 1 like
chr16	71917735	71918269	535	803	12.0967	84.5216	80.3684	Promoter (<=1kb)	16	71893583	71918093	55565	0	ENSG00000102984	ZNF821	zinc finger protein 821
chr16	71929209	71929747	539	618	11.0997	65.8621	61.8271	Promoter (<=1kb)	16	71929396	71964540	9798	0	ENSG00000182149	IST1	IST1, ESCRT-III associated factor
chr16	72955643	72955937	295	76	4.00556	11.0531	7.63236	Intron (uc002fck.3/463, intron 3 of 9)	16	72816786	73082274	463	126337	ENSG00000140836	ZFHX3	zinc finger homeobox 3
chr16	74640631	74641357	727	1915	30.7674	196.294	191.549	Promoter (<=1kb)	16	74481326	74641042	2734	0	ENSG00000090863	GLG1	golgi glycoprotein 1
chr16	75272792	75273032	241	120	4.02726	15.6137	12.0832	Promoter (<=1kb)	16	75262928	75272980	9564	0	ENSG00000050820	BCAR1	BCAR1, Cas family scaffold protein
chr16	75600064	75600367	304	237	6.04836	27.4436	23.7332	Promoter (<=1kb)	16	75600249	75611779	11345	0	ENSG00000034713	GABARAPL2	GABA type A receptor associated protein like 2
chr16	75681235	75681978	744	774	13.9322	81.5433	77.4084	Promoter (<=1kb)	16	75661622	75681585	3735	0	ENSG00000065427	KARS	lysyl-tRNA synthetase
chr16	75682310	75682650	341	397	8.23701	43.6405	39.7705	Promoter (<=1kb)	16	75675462	75682541	3735	0	ENSG00000065427	KARS	lysyl-tRNA synthetase
chr16	77822370	77822582	213	111	4.40059	14.703	11.1911	Promoter (<=1kb)	16	77822483	78014001	57687	0	ENSG00000171724	VAT1L	vesicle amine transport 1 like
chr16	81069252	81069823	572	540	14.8754	58.0642	54.0834	Promoter (<=1kb)	16	81069458	81080951	23300	0	ENSG00000166454	ATMIN	ATM interactor
chr16	81129717	81130008	292	82	4.13478	11.7331	8.29211	Promoter (<=1kb)	16	81115552	81129980	2653	0	ENSG00000140905	GCSH	glycine cleavage system protein H
chr16	81478648	81478971	324	95	5.22765	13.0471	9.57396	Promoter (<=1kb)	16	81478775	81745367	80790	0	ENSG00000153815	CMIP	c-Maf inducing protein
chr16	82203698	82203949	252	115	5.28539	15.026	11.5075	Promoter (<=1kb)	16	82181767	82203829	10200	0	ENSG00000135698	MPHOSPH6	M-phase phosphoprotein 6
chr16	84150221	84150947	727	50	4.49108	8.42971	5.09664	Promoter (<=1kb)	16	84087369	84150517	8720	0	ENSG00000140943	MBTPS1	membrane bound transcription factor peptidase, site 1
chr16	84681910	84682317	408	487	12.9726	52.719	48.7776	Promoter (<=1kb)	16	84682131	84695916	79786	0	ENSG00000135686	KLHL36	kelch like family member 36
chr16	84733447	84733994	548	852	17.2365	89.4323	85.2499	Promoter (<=1kb)	16	84733555	84813527	9100	0	ENSG00000103194	USP10	ubiquitin specific peptidase 10
chr16	87417194	87417521	328	70	4.29438	10.416	7.01221	Promoter (<=1kb)	16	87362942	87417394	79791	0	ENSG00000103264	FBXO31	F-box protein 31
chr16	87425583	87426088	506	3220	42.1179	327.275	322.087	Promoter (<=1kb)	16	87362942	87425708	79791	0	ENSG00000103264	FBXO31	F-box protein 31
chr16	87984944	87985168	225	56	3.49362	8.95971	5.60798	Promoter (<=1kb)	16	87985038	88110924	54971	0	ENSG00000172530	BANP	BTG3 associated nuclear protein
chr16	88636582	88637084	503	576	9.86837	61.6076	57.6014	Promoter (<=1kb)	16	88636789	88677792	124245	0	ENSG00000158545	ZC3H18	zinc finger CCCH-type containing 18
chr16	88878162	88878551	390	269	7.18749	30.6748	26.9262	Promoter (<=1kb)	16	88875877	88878342	353	0	ENSG00000198931	APRT	adenine phosphoribosyltransferase
chr16	88923333	88923767	435	1177	19.3469	122.079	117.705	Promoter (<=1kb)	16	88880142	88923374	2588	0	ENSG00000141012	GALNS	galactosamine (N-acetyl)-6-sulfatase
chr16	89574654	89575076	423	804	14.6372	84.6533	80.4994	Promoter (<=1kb)	16	89574805	89604129	6687	0	ENSG00000197912	SPG7	SPG7, paraplegin matrix AAA peptidase subunit
chr16	89626789	89627558	770	259	8.19997	29.6967	25.9594	Promoter (<=1kb)	16	89627065	89633237	6137	0	ENSG00000167526	RPL13	ribosomal protein L13
chr16	89642097	89642320	224	42	3.50977	7.58702	4.29017	Promoter (<=1kb)	16	89642176	89663654	27132	0	ENSG00000178773	CPNE7	copine 7
chr16	89752945	89753371	427	337	10.3376	37.5313	33.7144	Promoter (<=1kb)	16	89753076	89758625	8558	0	ENSG00000185324	CDK10	cyclin dependent kinase 10
chr16	89787072	89787357	286	181	5.30558	21.7875	18.1533	Promoter (<=1kb)	16	89787393	89807332	92822	-36	ENSG00000158805	ZNF276	zinc finger protein 276
chr16	89883014	89883323	310	304	7.10865	34.2349	30.4496	Promoter (<=1kb)	16	89803959	89883065	2175	0	ENSG00000187741	FANCA	Fanconi anemia complementation group A
chr16	89988090	89988344	255	85	4.31897	11.99	8.54237	Promoter (<=1kb)	16	89988417	90002505	10381	-73	ENSG00000258947	TUBB3	tubulin beta 3 class III
chr16	90183267	90183755	489	88	5.77729	12.3493	8.89319	Intron (uc002fqr.2/uc002fqr.2, intron 3 of 8)	16	90127860	90142338	11105	-40929	ENSG00000126856	PRDM7	PR/SET domain 7
chr16	90184134	90184478	345	20	2.97303	5.20368	2.05316	Intron (uc002fqr.2/uc002fqr.2, intron 3 of 8)	16	90127860	90142338	11105	-41796	ENSG00000126856	PRDM7	PR/SET domain 7
chr17	656170	656781	612	314	9.24016	35.2782	31.4826	Promoter (<=1kb)	17	655573	658576	100131454	597	ENSG00000231784	DBIL5P	diazepam binding inhibitor-like 5, pseudogene
chr17	685314	685844	531	1451	19.2752	149.684	145.155	Promoter (<=1kb)	17	662549	685571	51031	0	ENSG00000167699	GLOD4	glyoxalase domain containing 4
chr17	900171	900673	503	2061	26.072	210.95	206.142	Promoter (<=1kb)	17	900357	905390	29928	0	ENSG00000177370	TIMM22	translocase of inner mitochondrial membrane 22
chr17	1302757	1303740	984	1654	16.8802	170.058	165.428	Promoter (<=1kb)	17	1247834	1303556	7531	0	ENSG00000108953	YWHAE	tyrosine 3-monooxygenase/tryptophan 5-monooxygenase activation protein epsilon
chr17	1359313	1359837	525	4081	38.3447	413.54	408.149	Promoter (<=1kb)	17	1324647	1359561	1398	0	ENSG00000167193	CRK	CRK proto-oncogene, adaptor protein
chr17	1552069	1552442	374	85	3.94925	11.9782	8.53143	Promoter (<=1kb)	17	1549445	1553392	83547	950	ENSG00000167705	RILP	Rab interacting lysosomal protein
chr17	1587912	1588302	391	777	12.2991	81.9262	77.7884	Promoter (<=1kb)	17	1553923	1588176	10594	0	ENSG00000174231	PRPF8	pre-mRNA processing factor 8
chr17	1933250	1933656	407	444	8.21179	48.3387	44.4309	Promoter (<=1kb)	17	1933431	1946725	1801	0	ENSG00000108963	DPH1	diphthamide biosynthesis 1
chr17	1945151	1945628	478	1941	24.6794	198.913	194.158	Promoter (<=1kb)	17	1945277	1946725	124641	0	ENSG00000262664	OVCA2	OVCA2, serine hydrolase domain containing
chr17	2239536	2239900	365	926	16.4751	96.888	92.6636	Promoter (<=1kb)	17	2225982	2240678	55720	778	ENSG00000167721	TSR1	TSR1, ribosome maturation factor
chr17	2240528	2241299	772	380	10.8425	41.9302	38.0745	Promoter (<=1kb)	17	2225982	2240678	55720	0	ENSG00000167721	TSR1	TSR1, ribosome maturation factor
chr17	2304180	2304540	361	436	8.68835	47.5725	43.6702	Promoter (<=1kb)	17	2287354	2304258	4335	0	ENSG00000070444	MNT	MAX network transcriptional repressor
chr17	2497222	2497844	623	1347	19.0398	139.237	134.762	Promoter (<=1kb)	17	2496923	2588909	5048	299	ENSG00000007168	PAFAH1B1	platelet activating factor acetylhydrolase 1b regulatory subunit 1
chr17	2689599	2689882	284	159	5.30067	19.5304	15.9307	Distal Intergenic	17	2699732	2941035	23108	-9850	ENSG00000132359	RAP1GAP2	RAP1 GTPase activating protein 2
chr17	3539447	3539814	368	89	3.51535	12.3625	8.90602	Promoter (<=1kb)	17	3539762	3566397	1497	0	ENSG00000040531	CTNS	cystinosin, lysosomal cystine transporter
chr17	3571931	3572539	609	1026	15.2997	106.976	102.692	Promoter (<=1kb)	17	3566187	3571973	30851	0	ENSG00000213977	TAX1BP3	Tax1 binding protein 3
chr17	3627107	3627494	388	191	5.78255	22.7529	19.1049	Promoter (<=1kb)	17	3617919	3627131	3682	0	ENSG00000083457	ITGAE	integrin subunit alpha E
chr17	3749328	3749726	399	767	15.1465	80.921	76.7895	Promoter (<=1kb)	17	3710045	3749545	55421	0	ENSG00000074356	NCBP3	nuclear cap binding subunit 3
chr17	4046243	4046611	369	215	5.60805	25.2813	21.5975	Promoter (<=1kb)	17	4046462	4060995	124936	0	ENSG00000167740	CYB5D2	cytochrome b5 domain containing 2
chr17	4046842	4047140	299	378	7.74614	41.6934	37.8411	Promoter (<=1kb)	17	4046915	4060995	124936	0	ENSG00000167740	CYB5D2	cytochrome b5 domain containing 2
chr17	4167003	4167401	399	294	7.49428	33.186	29.4122	Promoter (<=1kb)	17	4066665	4167142	51479	0	ENSG00000185722	ANKFY1	ankyrin repeat and FYVE domain containing 1
chr17	4269747	4270292	546	2637	36.337	268.736	263.716	Promoter (<=1kb)	17	4172512	4269969	7326	0	ENSG00000132388	UBE2G1	ubiquitin conjugating enzyme E2 G1
chr17	4607072	4607697	626	1177	18.84	122.14	117.766	Promoter (<=1kb)	17	4607525	4608824	101559451	0	ENSG00000244184	LOC101559451	uncharacterized LOC101559451
chr17	4692996	4693476	481	165	6.44229	20.1261	16.5169	Promoter (<=1kb)	17	4692254	4693884	388323	742	ENSG00000182327	GLTPD2	glycolipid transfer protein domain containing 2
chr17	4843066	4843429	364	241	7.72909	27.8847	24.1679	Promoter (<=1kb)	17	4840426	4843325	8402	0	ENSG00000108528	SLC25A11	solute carrier family 25 member 11
chr17	4870980	4871376	397	912	14.6951	95.4771	91.2605	Promoter (<=1kb)	17	4862521	4871132	9552	0	ENSG00000091640	SPAG7	sperm associated antigen 7
chr17	4890669	4891067	399	287	7.30349	32.5276	28.7597	Promoter (<=1kb)	17	4871287	4890960	23125	0	ENSG00000108509	CAMTA2	calmodulin binding transcription activator 2
chr17	5094855	5095354	500	331	8.01113	37.0018	33.1898	Promoter (<=1kb)	17	5082831	5095178	84622	0	ENSG00000180626	ZNF594	zinc finger protein 594
chr17	5322742	5323186	445	1290	13.1783	133.465	129.024	Promoter (<=1kb)	17	5289346	5323059	4927	0	ENSG00000108559	NUP88	nucleoporin 88
chr17	7137463	7137767	305	127	5.76927	16.2846	12.7418	Promoter (<=1kb)	17	7128661	7137863	1856	96	ENSG00000004975	DVL2	dishevelled segment polarity protein 2
chr17	7155015	7155563	549	443	7.96416	48.3053	44.398	Promoter (<=1kb)	17	7146906	7155259	23399	0	ENSG00000175826	CTDNEP1	CTD nuclear envelope phosphatase 1
chr17	7382579	7382939	361	135	5.63965	17.1299	13.5716	Promoter (<=1kb)	17	7362685	7382944	57659	5	ENSG00000174282	ZBTB4	zinc finger and BTB domain containing 4
chr17	7387994	7388255	262	181	5.30558	21.7875	18.1533	Promoter (<=1kb)	17	7387698	7417935	5430	296	ENSG00000284832	POLR2A	RNA polymerase II subunit A
chr17	7475693	7476169	477	1072	13.558	111.58	107.268	Promoter (<=1kb)	17	7475602	7482324	100533955	91	NA	SENP3-EIF4A1	SENP3-EIF4A1 readthrough (NMD candidate)
chr17	7486601	7487375	775	1036	13.7197	107.937	103.648	Promoter (<=1kb)	17	7486965	7491527	9526	0	ENSG00000129255	MPDU1	mannose-P-dolichol utilization defect 1
chr17	8057561	8057782	222	70	4.19421	10.4498	7.04498	Promoter (1-2kb)	17	8043788	8055753	5187	-1808	ENSG00000179094	PER1	period circadian regulator 1
chr17	8065780	8066532	753	1113	17.6939	115.706	111.37	Promoter (<=1kb)	17	8062465	8066293	6844	0	ENSG00000220205	VAMP2	vesicle associated membrane protein 2
chr17	8151170	8151562	393	772	16.385	81.3744	77.2406	Promoter (<=1kb)	17	8128139	8151413	80169	0	ENSG00000178971	CTC1	CST telomere replication complex component 1
chr17	8533834	8534101	268	102	4.13835	13.7708	10.2802	Promoter (<=1kb)	17	8377523	8534079	4628	0	ENSG00000133026	MYH10	myosin heavy chain 10
chr17	11923988	11924921	934	559	13.2901	59.9404	55.9461	Promoter (<=1kb)	17	11924135	12047051	6416	0	ENSG00000065559	MAP2K4	mitogen-activated protein kinase kinase 4
chr17	13972625	13973072	448	1173	24.0319	121.708	117.336	Promoter (<=1kb)	17	13932609	13972775	100874058	0	ENSG00000236088	COX10-AS1	COX10 antisense RNA 1
chr17	14212415	14212664	250	25	3.1382	5.78613	2.58768	Intron (uc002goh.1/9953, intron 1 of 1)	17	14207057	14209062	84815	5358	ENSG00000266709	MGC12916	uncharacterized protein MGC12916
chr17	15241754	15241984	231	60	5.57014	9.37392	6.00505	Promoter (2-3kb)	17	15207129	15244958	64518	2974	ENSG00000125409	TEKT3	tektin 3
chr17	15466535	15467072	538	490	11.5618	52.9844	49.0408	Promoter (<=1kb)	17	15339332	15466945	100533496	0	ENSG00000259024	TVP23C-CDRT4	TVP23C-CDRT4 readthrough
chr17	15848398	15848659	262	100	4.33691	13.565	10.0785	Promoter (<=1kb)	17	15848231	15879210	136	167	ENSG00000170425	ADORA2B	adenosine A2b receptor
chr17	15902664	15902980	317	227	6.76116	26.4506	22.7524	Promoter (<=1kb)	17	15902694	15932723	54902	0	ENSG00000011295	TTC19	tetratricopeptide repeat domain 19
chr17	16118234	16119115	882	1438	19.1547	148.343	143.821	Promoter (<=1kb)	17	15933408	16118874	9611	0	ENSG00000141027	NCOR1	nuclear receptor corepressor 1
chr17	16472185	16472444	260	95	4.02313	13.0696	9.59622	Promoter (<=1kb)	17	16453631	16472483	57336	39	ENSG00000141040	ZNF287	zinc finger protein 287
chr17	16556881	16557341	461	1786	25.8463	183.366	178.673	Promoter (<=1kb)	17	16524048	16557167	57547	0	ENSG00000197566	ZNF624	zinc finger protein 624
chr17	17109666	17109887	222	60	4.02832	9.44281	6.07252	Promoter (<=1kb)	17	17104309	17109646	201164	-20	ENSG00000179598	PLD6	phospholipase D family member 6
chr17	17184200	17184709	510	584	10.7218	62.5115	58.4994	Promoter (<=1kb)	17	17149938	17184617	8533	0	ENSG00000141030	COPS3	COP9 signalosome subunit 3
chr17	17586101	17586371	271	116	4.35057	15.14	11.6199	Promoter (1-2kb)	17	17584787	17714765	10743	1314	ENSG00000108557	RAI1	retinoic acid induced 1
chr17	17597772	17598149	378	407	8.94486	44.6085	40.7303	Intron (uc002grm.3/10743, intron 1 of 5)	17	17584787	17714765	10743	12985	ENSG00000108557	RAI1	retinoic acid induced 1
chr17	17739673	17740106	434	68	3.73456	10.2098	6.8154	Promoter (<=1kb)	17	17714663	17740325	6720	219	ENSG00000072310	SREBF1	sterol regulatory element binding transcription factor 1
chr17	17942259	17942672	414	827	11.1623	86.9484	82.7806	Promoter (<=1kb)	17	17942611	17971718	79018	0	ENSG00000141034	GID4	GID complex subunit 4 homolog
chr17	18087412	18087686	275	38	3.6285	7.15476	3.88216	Promoter (<=1kb)	17	18086867	18113267	54890	545	ENSG00000091542	ALKBH5	alkB homolog 5, RNA demethylase
chr17	18218337	18218868	532	775	12.7698	81.6818	77.5456	Promoter (<=1kb)	17	18218594	18231370	140775	0	ENSG00000176994	SMCR8	Smith-Magenis syndrome chromosome region, candidate 8
chr17	18315431	18315656	226	72	3.72358	10.6868	7.27575	Exon (uc002gtt.1/uc002gtt.1, exon 1 of 2)	17	18325495	18328647	339240	-9839	NA	KRT17P5	keratin 17 pseudogene 5
chr17	18684379	18684840	462	821	14.681	86.3147	82.1513	Promoter (<=1kb)	17	18684582	18710026	51030	0	ENSG00000171928	TVP23B	trans-golgi network vesicle protein 23 homolog B
chr17	18761304	18761743	440	288	6.68503	32.5868	28.8183	Promoter (<=1kb)	17	18761381	18834599	5636	0	ENSG00000141127	PRPSAP2	phosphoribosyl pyrophosphate synthetase associated protein 2
chr17	19014351	19014748	398	901	16.1728	94.3155	90.1053	Distal Intergenic	17	19030782	19062148	400581	-16034	ENSG00000189152	GRAPL	GRB2 related adaptor protein like
chr17	19140503	19140977	475	1302	21.3548	134.706	130.258	Promoter (<=1kb)	17	19140690	19187027	22905	0	ENSG00000072134	EPN2	epsin 2
chr17	19551649	19551923	275	96	3.68452	13.0837	9.60971	Promoter (<=1kb)	17	19552064	19580908	224	-141	ENSG00000072210	ALDH3A2	aldehyde dehydrogenase 3 family member A2
chr17	19880819	19881245	427	263	7.0281	30.1336	26.3917	Promoter (<=1kb)	17	19807765	19881169	11216	0	ENSG00000108599	AKAP10	A-kinase anchoring protein 10
chr17	21117016	21117718	703	1533	20.0278	157.903	153.332	Promoter (<=1kb)	17	21101263	21117908	8834	190	ENSG00000178307	TMEM11	transmembrane protein 11
chr17	21666785	21667233	449	42	4.82745	7.50176	4.20799	Distal Intergenic	17	21825370	21826499	284123	-158137	ENSG00000178130	FAM27E5	family with sequence similarity E5
chr17	22020672	22020894	223	296	8.58876	33.4674	29.6901	Promoter (1-2kb)	17	22022437	22023991	100462977	-1543	ENSG00000256618	MTRNR2L1	MT-RNR2 like 1
chr17	22244715	22245113	399	585	5.14297	62.5155	58.5034	Distal Intergenic	17	22022437	22023991	100462977	222278	ENSG00000256618	MTRNR2L1	MT-RNR2 like 1
chr17	22245544	22246365	822	811	4.59662	85.3483	81.1901	Distal Intergenic	17	22022437	22023991	100462977	223107	ENSG00000256618	MTRNR2L1	MT-RNR2 like 1
chr17	22247038	22247275	238	1054	5.72168	109.777	105.476	Distal Intergenic	17	22022437	22023991	100462977	224601	ENSG00000256618	MTRNR2L1	MT-RNR2 like 1
chr17	22247782	22248192	411	832	3.67404	87.3781	83.2083	Distal Intergenic	17	22022437	22023991	100462977	225345	ENSG00000256618	MTRNR2L1	MT-RNR2 like 1
chr17	22249400	22250438	1039	929	4.50519	97.1804	92.9543	Distal Intergenic	17	22022437	22023991	100462977	226963	ENSG00000256618	MTRNR2L1	MT-RNR2 like 1
chr17	22251188	22251800	613	872	4.75959	91.4754	87.2812	Distal Intergenic	17	22022437	22023991	100462977	228751	ENSG00000256618	MTRNR2L1	MT-RNR2 like 1
chr17	22252044	22252359	316	2407	5.46869	245.722	240.774	Distal Intergenic	17	22022437	22023991	100462977	229607	ENSG00000256618	MTRNR2L1	MT-RNR2 like 1
chr17	22252910	22253378	469	2987	3.75064	303.844	298.716	Distal Intergenic	17	22022437	22023991	100462977	230473	ENSG00000256618	MTRNR2L1	MT-RNR2 like 1
chr17	22254599	22255437	839	2329	5.08348	237.884	232.964	Distal Intergenic	17	22022437	22023991	100462977	232162	ENSG00000256618	MTRNR2L1	MT-RNR2 like 1
chr17	22257037	22257800	764	332	2.9114	37.1067	33.2937	Distal Intergenic	17	22022437	22023991	100462977	234600	ENSG00000256618	MTRNR2L1	MT-RNR2 like 1
chr17	22258073	22258773	701	2440	6.64131	248.974	244.015	Distal Intergenic	17	22022437	22023991	100462977	235636	ENSG00000256618	MTRNR2L1	MT-RNR2 like 1
chr17	22259601	22260117	517	760	3.16051	80.1732	76.0464	Distal Intergenic	17	22022437	22023991	100462977	237164	ENSG00000256618	MTRNR2L1	MT-RNR2 like 1
chr17	22260393	22261692	1300	1392	3.49993	143.748	139.249	Distal Intergenic	17	22022437	22023991	100462977	237956	ENSG00000256618	MTRNR2L1	MT-RNR2 like 1
chr17	25264714	25265264	551	88	4.9155	12.2947	8.8394	Distal Intergenic	17	25620936	25621022	100616277	355758	ENSG00000263583	MIR4522	microRNA 4522
chr17	25266251	25266546	296	231	8.1319	26.8892	23.185	Distal Intergenic	17	25620936	25621022	100616277	354476	ENSG00000263583	MIR4522	microRNA 4522
chr17	25267406	25268248	843	43	4.11935	7.68948	4.38766	Distal Intergenic	17	25620936	25621022	100616277	352774	ENSG00000263583	MIR4522	microRNA 4522
chr17	25270671	25270926	256	32	4.3502	6.43997	3.21106	Distal Intergenic	17	25620936	25621022	100616277	350096	ENSG00000263583	MIR4522	microRNA 4522
chr17	25272275	25273046	772	89	6.68417	12.3857	8.92713	Distal Intergenic	17	25620936	25621022	100616277	347976	ENSG00000263583	MIR4522	microRNA 4522
chr17	25277275	25277534	260	42	4.82745	7.50176	4.20799	Distal Intergenic	17	25620936	25621022	100616277	343488	ENSG00000263583	MIR4522	microRNA 4522
chr17	25277745	25277986	242	45	4.85142	7.84479	4.53872	Distal Intergenic	17	25620936	25621022	100616277	343036	ENSG00000263583	MIR4522	microRNA 4522
chr17	25279415	25279639	225	61	5.45698	9.53147	6.15761	Distal Intergenic	17	25620936	25621022	100616277	341383	ENSG00000263583	MIR4522	microRNA 4522
chr17	25279881	25280842	962	120	7.79819	15.6075	12.0775	Distal Intergenic	17	25620936	25621022	100616277	340180	ENSG00000263583	MIR4522	microRNA 4522
chr17	25283361	25283974	614	79	6.31282	11.3568	7.92535	Distal Intergenic	17	25620936	25621022	100616277	337048	ENSG00000263583	MIR4522	microRNA 4522
chr17	25284943	25285440	498	87	6.33029	12.1833	8.73248	Distal Intergenic	17	25620936	25621022	100616277	335582	ENSG00000263583	MIR4522	microRNA 4522
chr17	25288446	25288934	489	43	4.71899	7.62167	4.32359	Distal Intergenic	17	25620936	25621022	100616277	332088	ENSG00000263583	MIR4522	microRNA 4522
chr17	25291144	25291540	397	52	5.11591	8.60995	5.27011	Distal Intergenic	17	25620936	25621022	100616277	329482	ENSG00000263583	MIR4522	microRNA 4522
chr17	25295207	25295702	496	68	5.66395	10.2466	6.85136	Distal Intergenic	17	25620936	25621022	100616277	325320	ENSG00000263583	MIR4522	microRNA 4522
chr17	25296207	25296436	230	50	5.1988	8.42311	5.09023	Distal Intergenic	17	25620936	25621022	100616277	324586	ENSG00000263583	MIR4522	microRNA 4522
chr17	25297369	25297880	512	53	4.48184	8.71728	5.37371	Distal Intergenic	17	25620936	25621022	100616277	323142	ENSG00000263583	MIR4522	microRNA 4522
chr17	25299103	25299361	259	42	4.82745	7.50176	4.20799	Distal Intergenic	17	25620936	25621022	100616277	321661	ENSG00000263583	MIR4522	microRNA 4522
chr17	25300470	25300879	410	69	5.94148	10.3523	6.9518	Distal Intergenic	17	25620936	25621022	100616277	320143	ENSG00000263583	MIR4522	microRNA 4522
chr17	25301114	25302331	1218	412	16.3391	45.0831	41.2008	Distal Intergenic	17	25620936	25621022	100616277	318691	ENSG00000263583	MIR4522	microRNA 4522
chr17	25302855	25303617	763	131	8.16954	16.7228	13.1715	Distal Intergenic	17	25620936	25621022	100616277	317405	ENSG00000263583	MIR4522	microRNA 4522
chr17	25303900	25304182	283	89	6.68417	12.3857	8.92713	Distal Intergenic	17	25620936	25621022	100616277	316840	ENSG00000263583	MIR4522	microRNA 4522
chr17	25620866	25621359	494	1389	18.5622	143.43	138.932	Promoter (<=1kb)	17	25620936	25621022	100616277	0	ENSG00000263583	MIR4522	microRNA 4522
chr17	25680653	25680910	258	76	4.00556	11.0531	7.63236	Distal Intergenic	17	25621106	25640645	26118	59547	ENSG00000109046	WSB1	WD repeat and SOCS box containing 1
chr17	26684462	26684874	413	571	12.718	61.1452	57.1427	Promoter (<=1kb)	17	26684687	26689089	147007	0	ENSG00000244045	TMEM199	transmembrane protein 199
chr17	26898157	26898735	579	695	15.2927	73.6364	69.5499	Promoter (<=1kb)	17	26880406	26898496	94005	0	ENSG00000087111	PIGS	phosphatidylinositol glycan anchor biosynthesis class S
chr17	26971936	26972180	245	35	3.2044	6.77922	3.52302	Promoter (<=1kb)	17	26941458	26972177	9703	0	ENSG00000007202	KIAA0100	KIAA0100
chr17	27046940	27047232	293	92	4.45829	12.7074	9.2411	Promoter (<=1kb)	17	27047000	27051374	6147	0	ENSG00000198242	RPL23A	ribosomal protein L23a
chr17	27181916	27182286	371	673	11.6856	71.3731	67.3009	Promoter (<=1kb)	17	27182043	27184171	26284	0	ENSG00000132591	ERAL1	Era like 12S mitochondrial rRNA chaperone 1
chr17	27229831	27230135	305	56	4.60758	8.97006	5.6179	Promoter (<=1kb)	17	27224799	27229975	147015	0	ENSG00000167536	DHRS13	dehydrogenase/reductase 13
chr17	27276522	27276802	281	87	4.09597	12.1854	8.73401	Promoter (<=1kb)	17	27232271	27277289	57649	487	ENSG00000109118	PHF12	PHD finger protein 12
chr17	27476059	27476322	264	171	6.21365	20.7958	17.177	Intron (uc010csa.1/399687, intron 2 of 39)	17	27421954	27467404	399687	-8655	ENSG00000196535	MYO18A	myosin XVIIIA
chr17	27619734	27620307	574	934	15.7433	97.6443	93.4151	Promoter (<=1kb)	17	27582854	27621166	57532	859	ENSG00000108256	NUFIP2	NUFIP2, FMR1 interacting protein 2
chr17	27717575	27717942	368	181	5.20809	21.7794	18.1458	Promoter (<=1kb)	17	27717680	27717748	100616122	0	ENSG00000284162	MIR4523	microRNA 4523
chr17	28443665	28444030	366	385	10.5592	42.4419	38.5825	Promoter (<=1kb)	17	28443825	28513493	84081	0	ENSG00000126653	NSRP1	nuclear speckle splicing regulatory protein 1
chr17	28618782	28619315	534	61	4.57876	9.54148	6.16707	Promoter (<=1kb)	17	28575213	28619184	642	0	ENSG00000108578	BLMH	bleomycin hydrolase
chr17	28705789	28706195	407	140	4.85194	17.6017	14.0355	Promoter (<=1kb)	17	28705942	28796675	1362	0	ENSG00000108582	CPD	carboxypeptidase D
chr17	28804257	28804689	433	482	10.8827	52.2323	48.2942	Promoter (<=1kb)	17	28804426	28812280	9527	0	ENSG00000108587	GOSR1	golgi SNAP receptor complex member 1
chr17	28994913	28995272	360	560	9.1019	60.0294	56.0344	Distal Intergenic	17	29036626	29097068	440423	-41354	NA	SUZ12P1	SUZ12 polycomb repressive complex 2 subunit pseudogene 1
chr17	29058786	29059072	287	114	4.87626	14.9371	11.4213	Promoter (<=1kb)	17	29058724	29085353	440423	62	NA	SUZ12P1	SUZ12 polycomb repressive complex 2 subunit pseudogene 1
chr17	29421838	29422364	527	491	9.3701	53.0724	49.128	Promoter (<=1kb)	17	29421945	29546377	4763	0	ENSG00000196712	NF1	neurofibromin 1
chr17	29876463	29876776	314	15	2.74678	4.66961	1.58119	Distal Intergenic	17	29887015	29887102	406968	-10239	ENSG00000207614	MIR193A	microRNA 193a
chr17	30264108	30264392	285	90	5.00349	12.5094	9.04789	Promoter (<=1kb)	17	30264044	30328057	23512	64	ENSG00000178691	SUZ12	SUZ12 polycomb repressive complex 2 subunit
chr17	30410896	30411405	510	759	14.3954	80.0969	75.9704	Distal Intergenic	17	30367355	30369851	6458	43541	NA	SH3GL1P1	SH3 domain containing GRB2 like 1, endophilin A2 pseudogene 1
chr17	30676937	30677251	315	580	10.7674	62.0464	58.0374	Promoter (<=1kb)	17	30677128	30677221	693217	0	ENSG00000283774	MIR632	microRNA 632
chr17	30771328	30771963	636	740	12.2068	78.1205	74.0062	Promoter (<=1kb)	17	30771481	30804847	5717	0	ENSG00000108671	PSMD11	proteasome 26S subunit, non-ATPase 11
chr17	33288170	33288664	495	63	3.3184	9.73244	6.35237	Promoter (<=1kb)	17	33254878	33288528	10693	0	ENSG00000132141	CCT6B	chaperonin containing TCP1 subunit 6B
chr17	33469107	33469429	323	125	4.62626	16.1317	12.5915	Promoter (<=1kb)	17	33458368	33469322	54475	0	ENSG00000073536	NLE1	notchless homolog 1
chr17	33914201	33914544	344	338	6.51217	37.703	33.8848	Promoter (<=1kb)	17	33914282	34053436	163	0	ENSG00000006125	AP2B1	adaptor related protein complex 2 beta 1 subunit
chr17	34136443	34136971	529	1812	27.9513	185.965	181.261	Promoter (<=1kb)	17	34136459	34174246	8148	0	ENSG00000270647	TAF15	TATA-box binding protein associated factor 15
chr17	34842500	34842734	235	69	4.66416	10.3686	6.96704	Promoter (<=1kb)	17	34842473	34855154	9326	27	ENSG00000273611	ZNHIT3	zinc finger HIT-type containing 3
chr17	34891095	34891434	340	163	6.05831	19.9275	16.3218	Promoter (<=1kb)	17	34891403	34895150	284098	0	ENSG00000277161	PIGW	phosphatidylinositol glycan anchor biosynthesis class W
chr17	35715916	35716343	428	78	4.62008	11.2351	7.80951	Promoter (<=1kb)	17	35441927	35716059	31	0	ENSG00000278540	ACACA	acetyl-CoA carboxylase alpha
chr17	35767185	35767395	211	104	5.27962	13.9047	10.4105	Promoter (<=1kb)	17	35767312	35825757	6871	0	ENSG00000276234	TADA2A	transcriptional adaptor 2A
chr17	35969162	35969658	497	1119	13.9373	116.312	111.973	Promoter (<=1kb)	17	35874900	35969486	11276	0	ENSG00000275066	SYNRG	synergin gamma
chr17	36003305	36003596	292	47	3.03397	8.06407	4.74876	Promoter (<=1kb)	17	35972363	36003493	11056	0	ENSG00000278053	DDX52	DExD-box helicase 52
chr17	36452940	36453261	322	228	7.43258	26.5573	22.8581	Promoter (<=1kb)	17	36452989	36479101	84311	0	ENSG00000278845	MRPL45	mitochondrial ribosomal protein L45
chr17	36861238	36861491	254	151	6.07246	18.7117	15.1267	Promoter (<=1kb)	17	36861873	36871009	4302	-382	ENSG00000275023	MLLT6	MLLT6, PHD finger containing
chr17	36903891	36904443	553	284	7.66269	32.2407	28.4765	Promoter (<=1kb)	17	36890150	36904561	7703	118	ENSG00000277258	PCGF2	polycomb group ring finger 2
chr17	36955931	36956483	553	1359	22.6281	140.476	135.994	Promoter (<=1kb)	17	36921944	36956158	8396	0	ENSG00000276293	PIP4K2B	phosphatidylinositol-5-phosphate 4-kinase type 2 beta
chr17	37558390	37558657	268	98	5.04936	13.3259	9.84619	Promoter (<=1kb)	17	37408897	37557909	84961	-481	ENSG00000108306	FBXL20	F-box and leucine rich repeat protein 20
chr17	37607390	37607622	233	66	4.80591	10.0209	6.63193	Promoter (<=1kb)	17	37560538	37607527	5469	0	ENSG00000125686	MED1	mediator complex subunit 1
chr17	37729777	37729992	216	51	2.89206	8.45041	5.11609	Distal Intergenic	17	37760021	37764175	4761	34183	ENSG00000171532	NEUROD2	neuronal differentiation 2
chr17	37844147	37844362	216	40	3.34372	7.37432	4.09353	Promoter (<=1kb)	17	37827375	37844310	93210	0	ENSG00000161395	PGAP3	post-GPI attachment to proteins 3
chr17	38296288	38297020	733	576	11.5637	61.6076	57.6014	Promoter (<=1kb)	17	38296507	38323333	22794	0	ENSG00000108349	CASC3	cancer susceptibility 3
chr17	38375343	38375715	373	498	10.5884	53.8196	49.8698	Promoter (<=1kb)	17	38375574	38417249	147179	0	ENSG00000171475	WIPF2	WAS/WASL interacting protein family member 2
chr17	38474362	38474692	331	245	5.67115	28.3168	24.5955	Promoter (<=1kb)	17	38474473	38513895	5914	0	ENSG00000131759	RARA	retinoic acid receptor alpha
chr17	40021290	40021874	585	1826	24.6989	187.317	182.607	Promoter (<=1kb)	17	40009799	40021629	55175	0	ENSG00000178502	KLHL11	kelch like family member 11
chr17	40169134	40169684	551	2565	28.6718	261.525	256.527	Promoter (<=1kb)	17	40169594	40177656	28511	0	ENSG00000168256	NKIRAS2	NFKB inhibitor interacting Ras like 2
chr17	40171853	40172230	378	20	2.97303	5.20368	2.05316	Promoter (<=1kb)	17	40172087	40177656	28511	0	ENSG00000168256	NKIRAS2	NFKB inhibitor interacting Ras like 2
chr17	40202409	40202761	353	172	6.40355	20.8982	17.2773	Distal Intergenic	17	40177594	40190044	201181	-12365	ENSG00000187595	ZNF385C	zinc finger protein 385C
chr17	40273204	40273464	261	132	5.80429	16.7747	13.2227	Promoter (<=1kb)	17	40265129	40273382	2648	0	ENSG00000108773	KAT2A	lysine acetyltransferase 2A
chr17	40427978	40428368	391	363	10.4156	40.1958	36.3551	Promoter (<=1kb)	17	40351195	40428424	6777	56	ENSG00000173757	STAT5B	signal transducer and activator of transcription 5B
chr17	40610581	40610928	348	394	9.99024	43.2979	39.4311	Promoter (<=1kb)	17	40610862	40622984	535	0	ENSG00000033627	ATP6V0A1	ATPase H+ transporting V0 subunit a1
chr17	40718862	40719123	262	50	3.45016	8.35947	5.03352	Promoter (<=1kb)	17	40719078	40725221	6945	0	ENSG00000108788	MLX	MLX, MAX dimerization protein
chr17	40811151	40811463	313	112	5.81181	14.7905	11.2774	Promoter (<=1kb)	17	40811266	40819024	27175	0	ENSG00000037042	TUBG2	tubulin gamma 2
chr17	40950507	40950832	326	270	6.4728	30.844	27.0938	Promoter (<=1kb)	17	40947165	40950743	28958	0	ENSG00000183978	COA3	cytochrome c oxidase assembly factor 3
chr17	41132429	41132925	497	1027	18.664	107.009	102.725	Promoter (<=1kb)	17	41120105	41132545	100885848	0	ENSG00000267060	PTGES3L	prostaglandin E synthase 3 like
chr17	41438781	41439010	230	42	4.82745	7.50176	4.20799	Distal Intergenic	17	41447213	41466266	100130581	27256	ENSG00000188825	LINC00910	long intergenic non-protein coding RNA 910
chr17	41529624	41529888	265	56	3.96404	9.00262	5.64892	Distal Intergenic	17	41522174	41522253	100313779	7450	ENSG00000284344	MIR2117	microRNA 2117
chr17	42092096	42092409	314	226	5.31256	26.3043	22.6079	Promoter (<=1kb)	17	42088556	42092345	84336	0	ENSG00000091947	TMEM101	transmembrane protein 101
chr17	42143633	42144196	564	1817	31.838	186.425	181.719	Promoter (<=1kb)	17	42112003	42144101	124801	0	ENSG00000161654	LSM12	LSM12 homolog
chr17	42148172	42148475	304	120	5.64373	15.5728	12.0446	Promoter (<=1kb)	17	42148098	42153712	92579	74	ENSG00000141349	G6PC3	glucose-6-phosphatase catalytic subunit 3
chr17	42200774	42201186	413	151	4.88113	18.7398	15.1538	Promoter (<=1kb)	17	42154121	42201014	10014	0	ENSG00000108840	HDAC5	histone deacetylase 5
chr17	42276898	42277183	286	123	5.94159	15.9008	12.3653	Promoter (1-2kb)	17	42269173	42275529	56970	-1369	ENSG00000087152	ATXN7L3	ataxin 7 like 3
chr17	42299828	42300082	255	86	3.69765	12.1232	8.67297	Promoter (<=1kb)	17	42282401	42298994	7343	-834	ENSG00000108312	UBTF	upstream binding transcription factor
chr17	42580393	42581033	641	718	12.1675	75.9121	71.8113	Promoter (<=1kb)	17	42472645	42580957	23131	0	ENSG00000186566	GPATCH8	G-patch domain containing 8
chr17	42766853	42767340	488	3504	20.7499	355.696	350.436	Promoter (<=1kb)	17	42754805	42767165	124808	0	ENSG00000180329	CCDC43	coiled-coil domain containing 43
chr17	43047788	43048215	428	316	6.9238	35.4011	31.6039	Promoter (2-3kb)	17	43037061	43045644	10882	-2144	ENSG00000131094	C1QL1	complement C1q like 1
chr17	43096669	43096937	269	39	3.21838	7.23952	3.96404	Distal Intergenic	17	43100706	43112509	79877	15572	ENSG00000172992	DCAKD	dephospho-CoA kinase domain containing
chr17	43138633	43138848	216	55	2.63333	8.89652	5.54676	Promoter (<=1kb)	17	43138680	43164020	4836	0	ENSG00000136448	NMT1	N-myristoyltransferase 1
chr17	43224775	43225072	298	156	4.59093	19.2477	15.6518	Promoter (<=1kb)	17	43224684	43229468	10614	91	ENSG00000186834	HEXIM1	hexamethylene bisacetamide inducible 1
chr17	43238361	43239079	719	2427	19.4728	247.721	242.766	Promoter (<=1kb)	17	43238264	43247406	124790	97	ENSG00000168517	HEXIM2	hexamethylene bisacetamide inducible 2
chr17	43662011	43662765	755	327	5.51223	36.5075	32.7001	Exon (uc031rbq.1/uc031rbq.1, exon 1 of 4)	17	43677491	43679748	644172	16983	NA	MAPK8IP1P2	mitogen-activated protein kinase 8 interacting protein 1 pseudogene 2
chr17	43663376	43663754	379	55	2.55978	8.94109	5.59032	Intron (uc031rbr.1/uc031rbr.1, intron 1 of 5)	17	43677491	43679748	644172	15994	NA	MAPK8IP1P2	mitogen-activated protein kinase 8 interacting protein 1 pseudogene 2
chr17	43972988	43973217	230	107	3.82679	14.2055	10.7058	Promoter (<=1kb)	17	43973149	43976164	100130148	0	ENSG00000279685	MAPT-IT1	MAPT intronic transcript 1
chr17	44269894	44271677	1784	1443	17.2582	148.871	144.345	Promoter (<=1kb)	17	44107282	44270166	284058	0	ENSG00000120071	KANSL1	KAT8 regulatory NSL complex subunit 1
chr17	44449773	44450424	652	1936	36.1588	198.364	193.61	Promoter (<=1kb)	17	44450179	44500463	728806	0	NA	NSFP1	N-ethylmaleimide-sensitive factor pseudogene 1
chr17	44667681	44668276	596	1464	21.3162	150.972	146.435	Promoter (<=1kb)	17	44668035	44834828	4905	0	ENSG00000073969	NSF	N-ethylmaleimide sensitive factor, vesicle fusing ATPase
chr17	45569708	45570033	326	220	4.42454	25.6995	22.0107	Promoter (<=1kb)	17	45527593	45569986	653479	0	NA	MRPL45P2	mitochondrial ribosomal protein L45 pseudogene 2
chr17	45908637	45909045	409	129	4.23086	16.4798	12.9337	Promoter (<=1kb)	17	45900638	45908907	124995	0	ENSG00000159111	MRPL10	mitochondrial ribosomal protein L10
chr17	46124943	46125486	544	962	9.99892	100.525	96.28	Promoter (<=1kb)	17	46125686	46138907	4779	-200	ENSG00000082641	NFE2L1	nuclear factor, erythroid 2 like 1
chr17	46671317	46671643	327	484	9.80764	52.3443	48.4051	Promoter (<=1kb)	17	46668619	46671103	3215	-214	ENSG00000120075	HOXB5	homeobox B5
chr17	46969713	46970002	290	81	3.29458	11.6108	8.17291	Promoter (<=1kb)	17	46970148	46973232	516	-146	ENSG00000159199	ATP5MC1	ATP synthase membrane subunit c locus 1
chr17	46985672	46986024	353	50	2.84532	8.43072	5.09747	Promoter (<=1kb)	17	46985731	47006422	65264	0	ENSG00000159202	UBE2Z	ubiquitin conjugating enzyme E2 Z
chr17	47647264	47647509	246	93	4.1137	12.8182	9.34952	Distal Intergenic	17	47653298	47661171	11248	-5789	ENSG00000182575	NXPH3	neurexophilin 3
chr17	47865737	47866140	404	564	10.6738	60.4306	56.4332	Promoter (<=1kb)	17	47865981	47906458	11143	0	ENSG00000136504	KAT7	lysine acetyltransferase 7
chr17	48423343	48423675	333	196	4.96981	23.2844	19.6283	Promoter (<=1kb)	17	48423393	48438512	64132	0	ENSG00000015532	XYLT2	xylosyltransferase 2
chr17	48556082	48556467	386	440	8.00316	47.9567	44.0518	Promoter (<=1kb)	17	48556190	48557990	55316	0	ENSG00000136444	RSAD1	radical S-adenosyl methionine domain containing 1
chr17	48624436	48624665	230	143	4.76423	17.9601	14.3877	Promoter (<=1kb)	17	48624429	48633213	64847	7	ENSG00000006282	SPATA20	spermatogenesis associated 20
[truncated: 3,166 more rows]
