# Supplementary material for: Transcription Elongation Machinery Is a Druggable Dependency and Potentiates Immunotherapy in Glioblastoma Stem Cells
Source: Oxford University Press journal article supplement (doi:10.1158/2159-8290.cd-20-1848), 2022-01-13
Supplement: 21598290cd201848-sup-257762_2_supp_7373641_qyxwb0.xlsx [file 21598290cd201848-sup-257762_2_supp_7373641_qyxwb0.xlsx]

## Sheet: Sheet1
Supplementary Table S3. Overlapping between chromatin interactions and YY1 binding peaks in glioblastoma stem cells.
Interaction_PeakA_Chr	Interaction_PeakA_Start	Interaction_PeakA_End	Interaction_PeakB_Chr	Interaction_PeakB_Start	Interaction_PeakB_End	YY1_Peak_Chr	YY1_Peak_Start	YY1_Peak_End	Sample
chr1	100312503	100316467	chr1	100502938	100505310	chr1	100503384	100504170	shCONT_rep1
chr1	100420806	100422222	chr1	100502938	100505310	chr1	100503384	100504170	shCONT_rep1
chr1	100434805	100438755	chr1	100595433	100599821	chr1	100598515	100598781	shCONT_rep1
chr1	100501052	100502207	chr1	100502938	100505310	chr1	100503384	100504170	shCONT_rep1
chr1	100502938	100505310	chr1	100507341	100508708	chr1	100503384	100504170	shCONT_rep1
chr1	100502938	100505310	chr1	100531610	100532767	chr1	100503384	100504170	shCONT_rep1
chr1	100502938	100505310	chr1	100549282	100550548	chr1	100503384	100504170	shCONT_rep1
chr1	100502938	100505310	chr1	100595433	100599821	chr1	100503384	100504170	shCONT_rep1
chr1	100502938	100505310	chr1	100595433	100599821	chr1	100598515	100598781	shCONT_rep1
chr1	100502938	100505310	chr1	101436410	101437543	chr1	100503384	100504170	shCONT_rep1
chr1	100531610	100532767	chr1	100595433	100599821	chr1	100598515	100598781	shCONT_rep1
chr1	100551899	100553470	chr1	100595433	100599821	chr1	100598515	100598781	shCONT_rep1
chr1	100555670	100557146	chr1	100595433	100599821	chr1	100598515	100598781	shCONT_rep1
chr1	100584420	100586134	chr1	100595433	100599821	chr1	100598515	100598781	shCONT_rep1
chr1	100593687	100595053	chr1	100595433	100599821	chr1	100598515	100598781	shCONT_rep1
chr1	100595433	100599821	chr1	100613063	100615240	chr1	100598515	100598781	shCONT_rep1
chr1	100595433	100599821	chr1	100731574	100733770	chr1	100598515	100598781	shCONT_rep1
chr1	100595433	100599821	chr1	100929279	100930412	chr1	100598515	100598781	shCONT_rep1
chr1	100595433	100599821	chr1	110830559	110834822	chr1	100598515	100598781	shCONT_rep1
chr1	100595433	100599821	chr1	238327363	238329991	chr1	100598515	100598781	shCONT_rep1
chr1	10071980	10074588	chr1	10091958	10093530	chr1	10092809	10093268	shCONT_rep1
chr1	100731574	100733770	chr1	100815836	100818972	chr1	100817778	100818372	shCONT_rep1
chr1	100750667	100752119	chr1	100815836	100818972	chr1	100817778	100818372	shCONT_rep1
chr1	100815836	100818972	chr1	100823026	100824252	chr1	100817778	100818372	shCONT_rep1
chr1	100815836	100818972	chr1	100837946	100839274	chr1	100817778	100818372	shCONT_rep1
chr1	100815836	100818972	chr1	100913668	100916299	chr1	100817778	100818372	shCONT_rep1
chr1	100815836	100818972	chr1	100924527	100925772	chr1	100817778	100818372	shCONT_rep1
chr1	10085962	10088614	chr1	10091958	10093530	chr1	10092809	10093268	shCONT_rep1
chr1	10091958	10093530	chr1	10094154	10095985	chr1	10092809	10093268	shCONT_rep1
chr1	10091958	10093530	chr1	10205519	10208588	chr1	10092809	10093268	shCONT_rep1
chr1	10229147	10230582	chr1	41705054	41708991	chr1	41707559	41707897	shCONT_rep1
chr1	10498140	10502610	chr1	10533855	10537650	chr1	10534865	10535287	shCONT_rep1
chr1	10507085	10508256	chr1	10533855	10537650	chr1	10534865	10535287	shCONT_rep1
chr1	10509018	10511255	chr1	10533855	10537650	chr1	10534865	10535287	shCONT_rep1
chr1	10513964	10515456	chr1	10533855	10537650	chr1	10534865	10535287	shCONT_rep1
chr1	10524324	10525484	chr1	10533855	10537650	chr1	10534865	10535287	shCONT_rep1
chr1	10527477	10529776	chr1	10533855	10537650	chr1	10534865	10535287	shCONT_rep1
chr1	10531912	10533292	chr1	10533855	10537650	chr1	10534865	10535287	shCONT_rep1
chr1	10533855	10537650	chr1	10538588	10539721	chr1	10534865	10535287	shCONT_rep1
chr1	10533855	10537650	chr1	10545822	10546969	chr1	10534865	10535287	shCONT_rep1
chr1	10533855	10537650	chr1	10547357	10548785	chr1	10534865	10535287	shCONT_rep1
chr1	10533855	10537650	chr1	10549282	10551854	chr1	10534865	10535287	shCONT_rep1
chr1	10533855	10537650	chr1	10555390	10557843	chr1	10534865	10535287	shCONT_rep1
chr1	10533855	10537650	chr1	10568107	10570664	chr1	10534865	10535287	shCONT_rep1
chr1	10533855	10537650	chr1	10710971	10712183	chr1	10534865	10535287	shCONT_rep1
chr1	10533855	10537650	chr1	10883720	10886554	chr1	10534865	10535287	shCONT_rep1
chr1	10533855	10537650	chr1	10926080	10929650	chr1	10534865	10535287	shCONT_rep1
chr1	1056322	1058800	chr1	1207722	1209794	chr1	1208821	1209448	shCONT_rep1
chr1	1062720	1064900	chr1	1166510	1167951	chr1	1167023	1167810	shCONT_rep1
chr1	1069882	1073990	chr1	1166510	1167951	chr1	1167023	1167810	shCONT_rep1
chr1	1069882	1073990	chr1	1207722	1209794	chr1	1208821	1209448	shCONT_rep1
chr1	109212835	109214863	chr1	109234096	109236661	chr1	109234693	109235303	shCONT_rep1
chr1	109212835	109214863	chr1	109415841	109422663	chr1	109419499	109419707	shCONT_rep1
chr1	109227777	109229553	chr1	109234096	109236661	chr1	109234693	109235303	shCONT_rep1
chr1	109234096	109236661	chr1	109237964	109239097	chr1	109234693	109235303	shCONT_rep1
chr1	109234096	109236661	chr1	109241175	109242308	chr1	109234693	109235303	shCONT_rep1
chr1	109234096	109236661	chr1	109243545	109245627	chr1	109234693	109235303	shCONT_rep1
chr1	109234096	109236661	chr1	109247205	109248338	chr1	109234693	109235303	shCONT_rep1
chr1	109234096	109236661	chr1	109262148	109264366	chr1	109234693	109235303	shCONT_rep1
chr1	109234096	109236661	chr1	109288605	109290842	chr1	109234693	109235303	shCONT_rep1
chr1	109234096	109236661	chr1	109288605	109290842	chr1	109289141	109289720	shCONT_rep1
chr1	109234096	109236661	chr1	109662180	109665519	chr1	109234693	109235303	shCONT_rep1
chr1	1092408	1095330	chr1	1166510	1167951	chr1	1167023	1167810	shCONT_rep1
chr1	109243545	109245627	chr1	109288605	109290842	chr1	109289141	109289720	shCONT_rep1
chr1	109249040	109250177	chr1	109288605	109290842	chr1	109289141	109289720	shCONT_rep1
chr1	109262148	109264366	chr1	109288605	109290842	chr1	109289141	109289720	shCONT_rep1
chr1	109281747	109283068	chr1	109288605	109290842	chr1	109289141	109289720	shCONT_rep1
chr1	109288605	109290842	chr1	109358683	109361142	chr1	109289141	109289720	shCONT_rep1
chr1	109288605	109290842	chr1	109358683	109361142	chr1	109359059	109359365	shCONT_rep1
chr1	109288605	109290842	chr1	109415841	109422663	chr1	109289141	109289720	shCONT_rep1
chr1	109288605	109290842	chr1	109415841	109422663	chr1	109419499	109419707	shCONT_rep1
chr1	109288605	109290842	chr1	109441385	109443103	chr1	109289141	109289720	shCONT_rep1
chr1	109353667	109356936	chr1	109358683	109361142	chr1	109359059	109359365	shCONT_rep1
chr1	109353667	109356936	chr1	109415841	109422663	chr1	109419499	109419707	shCONT_rep1
chr1	109358683	109361142	chr1	109364664	109366553	chr1	109359059	109359365	shCONT_rep1
chr1	109358683	109361142	chr1	109373316	109375218	chr1	109359059	109359365	shCONT_rep1
chr1	109358683	109361142	chr1	109438473	109440908	chr1	109359059	109359365	shCONT_rep1
chr1	109358683	109361142	chr1	109441385	109443103	chr1	109359059	109359365	shCONT_rep1
chr1	109364664	109366553	chr1	109415841	109422663	chr1	109419499	109419707	shCONT_rep1
chr1	109370487	109371940	chr1	109415841	109422663	chr1	109419499	109419707	shCONT_rep1
chr1	109373316	109375218	chr1	109415841	109422663	chr1	109419499	109419707	shCONT_rep1
chr1	109376654	109379568	chr1	109415841	109422663	chr1	109419499	109419707	shCONT_rep1
chr1	109379932	109381065	chr1	109415841	109422663	chr1	109419499	109419707	shCONT_rep1
chr1	109388691	109390215	chr1	109415841	109422663	chr1	109419499	109419707	shCONT_rep1
chr1	109392995	109396772	chr1	109415841	109422663	chr1	109419499	109419707	shCONT_rep1
chr1	109401878	109403011	chr1	109415841	109422663	chr1	109419499	109419707	shCONT_rep1
chr1	109405392	109406525	chr1	109415841	109422663	chr1	109419499	109419707	shCONT_rep1
chr1	109408913	109410194	chr1	109415841	109422663	chr1	109419499	109419707	shCONT_rep1
chr1	109415841	109422663	chr1	109424090	109425246	chr1	109419499	109419707	shCONT_rep1
chr1	109415841	109422663	chr1	109429283	109430830	chr1	109419499	109419707	shCONT_rep1
chr1	109415841	109422663	chr1	109438473	109440908	chr1	109419499	109419707	shCONT_rep1
chr1	109415841	109422663	chr1	109441385	109443103	chr1	109419499	109419707	shCONT_rep1
chr1	109415841	109422663	chr1	109477701	109480003	chr1	109419499	109419707	shCONT_rep1
chr1	109415841	109422663	chr1	109654855	109656892	chr1	109419499	109419707	shCONT_rep1
chr1	109415841	109422663	chr1	109804450	109807222	chr1	109419499	109419707	shCONT_rep1
chr1	109788491	109793629	chr1	110026773	110030279	chr1	110026381	110026886	shCONT_rep1
chr1	109859257	109860979	chr1	184001279	184009297	chr1	184006370	184006690	shCONT_rep1
chr1	109959932	109963942	chr1	110026773	110030279	chr1	110026381	110026886	shCONT_rep1
chr1	109976473	109977865	chr1	110026773	110030279	chr1	110026381	110026886	shCONT_rep1
chr1	110022596	110023884	chr1	110026773	110030279	chr1	110026381	110026886	shCONT_rep1
chr1	110026773	110030279	chr1	110033415	110038605	chr1	110026381	110026886	shCONT_rep1
chr1	110026773	110030279	chr1	110041326	110042552	chr1	110026381	110026886	shCONT_rep1
chr1	110026773	110030279	chr1	110060110	110063570	chr1	110026381	110026886	shCONT_rep1
chr1	110026773	110030279	chr1	110072548	110073906	chr1	110026381	110026886	shCONT_rep1
chr1	110026773	110030279	chr1	110077034	110079396	chr1	110026381	110026886	shCONT_rep1
chr1	110026773	110030279	chr1	110165914	110167339	chr1	110026381	110026886	shCONT_rep1
chr1	110026773	110030279	chr1	110657886	110660890	chr1	110026381	110026886	shCONT_rep1
chr1	110084980	110087504	chr1	110162142	110164378	chr1	110162246	110162519	shCONT_rep1
chr1	110090103	110092247	chr1	110162142	110164378	chr1	110162246	110162519	shCONT_rep1
chr1	110118482	110119615	chr1	110162142	110164378	chr1	110162246	110162519	shCONT_rep1
chr1	110151164	110153825	chr1	110162142	110164378	chr1	110162246	110162519	shCONT_rep1
chr1	110154570	110156812	chr1	110162142	110164378	chr1	110162246	110162519	shCONT_rep1
chr1	110159307	110160712	chr1	110162142	110164378	chr1	110162246	110162519	shCONT_rep1
chr1	110162142	110164378	chr1	110165914	110167339	chr1	110162246	110162519	shCONT_rep1
chr1	110162142	110164378	chr1	110171087	110176261	chr1	110162246	110162519	shCONT_rep1
chr1	110162142	110164378	chr1	110182666	110185124	chr1	110162246	110162519	shCONT_rep1
chr1	110162142	110164378	chr1	110203265	110205829	chr1	110162246	110162519	shCONT_rep1
chr1	110162142	110164378	chr1	110208629	110211934	chr1	110162246	110162519	shCONT_rep1
chr1	110162142	110164378	chr1	110306674	110308634	chr1	110162246	110162519	shCONT_rep1
chr1	110162142	110164378	chr1	110312498	110313799	chr1	110162246	110162519	shCONT_rep1
chr1	110162142	110164378	chr1	110357570	110359299	chr1	110162246	110162519	shCONT_rep1
chr1	110162142	110164378	chr1	111910755	111914436	chr1	110162246	110162519	shCONT_rep1
chr1	11028889	11030155	chr1	11071899	11073604	chr1	11072514	11073134	shCONT_rep1
chr1	11035080	11037397	chr1	11071899	11073604	chr1	11072514	11073134	shCONT_rep1
chr1	110569926	110573038	chr1	110576785	110578430	chr1	110576976	110577560	shCONT_rep1
chr1	110576785	110578430	chr1	110646738	110652027	chr1	110576976	110577560	shCONT_rep1
chr1	110590081	110592727	chr1	110880636	110883393	chr1	110881005	110881323	shCONT_rep1
chr1	110590081	110592727	chr1	110880636	110883393	chr1	110881875	110882331	shCONT_rep1
chr1	11067997	11070614	chr1	11071899	11073604	chr1	11072514	11073134	shCONT_rep1
chr1	11071899	11073604	chr1	11076730	11079034	chr1	11072514	11073134	shCONT_rep1
chr1	11071899	11073604	chr1	11112282	11115039	chr1	11072514	11073134	shCONT_rep1
chr1	110769786	110771204	chr1	110880636	110883393	chr1	110881005	110881323	shCONT_rep1
chr1	110769786	110771204	chr1	110880636	110883393	chr1	110881875	110882331	shCONT_rep1
chr1	110776322	110778227	chr1	110880636	110883393	chr1	110881005	110881323	shCONT_rep1
chr1	110776322	110778227	chr1	110880636	110883393	chr1	110881875	110882331	shCONT_rep1
chr1	110830559	110834822	chr1	110880636	110883393	chr1	110881005	110881323	shCONT_rep1
chr1	110830559	110834822	chr1	110880636	110883393	chr1	110881875	110882331	shCONT_rep1
chr1	110845683	110847002	chr1	110880636	110883393	chr1	110881005	110881323	shCONT_rep1
chr1	110845683	110847002	chr1	110880636	110883393	chr1	110881875	110882331	shCONT_rep1
chr1	110848363	110853862	chr1	110880636	110883393	chr1	110881005	110881323	shCONT_rep1
chr1	110848363	110853862	chr1	110880636	110883393	chr1	110881875	110882331	shCONT_rep1
chr1	110874729	110877040	chr1	110880636	110883393	chr1	110881005	110881323	shCONT_rep1
chr1	110874729	110877040	chr1	110880636	110883393	chr1	110881875	110882331	shCONT_rep1
chr1	110880636	110883393	chr1	110884006	110885240	chr1	110881005	110881323	shCONT_rep1
chr1	110880636	110883393	chr1	110884006	110885240	chr1	110881875	110882331	shCONT_rep1
chr1	110880636	110883393	chr1	110887342	110888720	chr1	110881005	110881323	shCONT_rep1
chr1	110880636	110883393	chr1	110887342	110888720	chr1	110881875	110882331	shCONT_rep1
chr1	110880636	110883393	chr1	110889181	110890439	chr1	110881005	110881323	shCONT_rep1
chr1	110880636	110883393	chr1	110889181	110890439	chr1	110881875	110882331	shCONT_rep1
chr1	110880636	110883393	chr1	110932945	110934434	chr1	110881005	110881323	shCONT_rep1
chr1	110880636	110883393	chr1	110932945	110934434	chr1	110881875	110882331	shCONT_rep1
chr1	110880636	110883393	chr1	110943519	110945846	chr1	110881005	110881323	shCONT_rep1
chr1	110880636	110883393	chr1	110943519	110945846	chr1	110881875	110882331	shCONT_rep1
chr1	110880636	110883393	chr1	110949551	110951619	chr1	110881005	110881323	shCONT_rep1
chr1	110880636	110883393	chr1	110949551	110951619	chr1	110881875	110882331	shCONT_rep1
chr1	110880636	110883393	chr1	110954697	110958514	chr1	110881005	110881323	shCONT_rep1
chr1	110880636	110883393	chr1	110954697	110958514	chr1	110881875	110882331	shCONT_rep1
chr1	110880636	110883393	chr1	110975832	110977356	chr1	110881005	110881323	shCONT_rep1
chr1	110880636	110883393	chr1	110975832	110977356	chr1	110881875	110882331	shCONT_rep1
chr1	110880636	110883393	chr1	110989380	110991842	chr1	110881005	110881323	shCONT_rep1
chr1	110880636	110883393	chr1	110989380	110991842	chr1	110881875	110882331	shCONT_rep1
chr1	110880636	110883393	chr1	111036162	111038757	chr1	110881005	110881323	shCONT_rep1
chr1	110880636	110883393	chr1	111036162	111038757	chr1	110881875	110882331	shCONT_rep1
chr1	11102434	11107583	chr1	11157536	11160830	chr1	11159654	11160093	shCONT_rep1
chr1	11102434	11107583	chr1	11863043	11867124	chr1	11865865	11866363	shCONT_rep1
chr1	111322832	111324512	chr1	119682400	119684594	chr1	119683087	119683476	shCONT_rep1
chr1	11134974	11136153	chr1	11157536	11160830	chr1	11159654	11160093	shCONT_rep1
chr1	11148149	11151114	chr1	11157536	11160830	chr1	11159654	11160093	shCONT_rep1
chr1	11157536	11160830	chr1	11163074	11164332	chr1	11159654	11160093	shCONT_rep1
chr1	11157536	11160830	chr1	11187177	11189458	chr1	11159654	11160093	shCONT_rep1
chr1	1116075	1121545	chr1	1166510	1167951	chr1	1167023	1167810	shCONT_rep1
chr1	1126494	1127876	chr1	1166510	1167951	chr1	1167023	1167810	shCONT_rep1
chr1	113051544	113052754	chr1	113160994	113163590	chr1	113161457	113161874	shCONT_rep1
chr1	113051544	113052754	chr1	113160994	113163590	chr1	113162250	113162635	shCONT_rep1
chr1	11306354	11308978	chr1	11332811	11334279	chr1	11333162	11333558	shCONT_rep1
chr1	113093610	113094763	chr1	113160994	113163590	chr1	113161457	113161874	shCONT_rep1
chr1	113093610	113094763	chr1	113160994	113163590	chr1	113162250	113162635	shCONT_rep1
chr1	113154545	113155964	chr1	113160994	113163590	chr1	113161457	113161874	shCONT_rep1
chr1	113154545	113155964	chr1	113160994	113163590	chr1	113162250	113162635	shCONT_rep1
chr1	113160994	113163590	chr1	113166739	113168005	chr1	113161457	113161874	shCONT_rep1
chr1	113160994	113163590	chr1	113166739	113168005	chr1	113162250	113162635	shCONT_rep1
chr1	113160994	113163590	chr1	113204841	113205977	chr1	113161457	113161874	shCONT_rep1
chr1	113160994	113163590	chr1	113204841	113205977	chr1	113162250	113162635	shCONT_rep1
chr1	113160994	113163590	chr1	113215692	113218669	chr1	113161457	113161874	shCONT_rep1
chr1	113160994	113163590	chr1	113215692	113218669	chr1	113162250	113162635	shCONT_rep1
chr1	113160994	113163590	chr1	113234634	113235967	chr1	113161457	113161874	shCONT_rep1
chr1	113160994	113163590	chr1	113234634	113235967	chr1	113162250	113162635	shCONT_rep1
chr1	113160994	113163590	chr1	113240276	113242744	chr1	113161457	113161874	shCONT_rep1
chr1	113160994	113163590	chr1	113240276	113242744	chr1	113162250	113162635	shCONT_rep1
chr1	113160994	113163590	chr1	113249419	113250586	chr1	113161457	113161874	shCONT_rep1
chr1	113160994	113163590	chr1	113249419	113250586	chr1	113162250	113162635	shCONT_rep1
chr1	113160994	113163590	chr1	113252418	113255314	chr1	113161457	113161874	shCONT_rep1
chr1	113160994	113163590	chr1	113252418	113255314	chr1	113162250	113162635	shCONT_rep1
chr1	113160994	113163590	chr1	113255694	113256847	chr1	113161457	113161874	shCONT_rep1
chr1	113160994	113163590	chr1	113255694	113256847	chr1	113162250	113162635	shCONT_rep1
chr1	113160994	113163590	chr1	117597484	117599306	chr1	113161457	113161874	shCONT_rep1
chr1	113160994	113163590	chr1	117597484	117599306	chr1	113162250	113162635	shCONT_rep1
chr1	113258386	113263444	chr1	113613966	113617750	chr1	113615849	113616238	shCONT_rep1
chr1	11332811	11334279	chr1	11335280	11336561	chr1	11333162	11333558	shCONT_rep1
chr1	11332811	11334279	chr1	11350444	11351966	chr1	11333162	11333558	shCONT_rep1
chr1	11332811	11334279	chr1	11356454	11360314	chr1	11333162	11333558	shCONT_rep1
chr1	11332811	11334279	chr1	11403453	11407099	chr1	11333162	11333558	shCONT_rep1
chr1	11332811	11334279	chr1	11555777	11557176	chr1	11333162	11333558	shCONT_rep1
chr1	113338893	113341725	chr1	113613966	113617750	chr1	113615849	113616238	shCONT_rep1
chr1	113351366	113352795	chr1	113613966	113617750	chr1	113615849	113616238	shCONT_rep1
chr1	11337563	11341674	chr1	11863043	11867124	chr1	11865865	11866363	shCONT_rep1
chr1	113414591	113417558	chr1	113613966	113617750	chr1	113615849	113616238	shCONT_rep1
chr1	113498566	113502012	chr1	113613966	113617750	chr1	113615849	113616238	shCONT_rep1
chr1	113600914	113602527	chr1	113613966	113617750	chr1	113615849	113616238	shCONT_rep1
chr1	113613966	113617750	chr1	113618436	113619569	chr1	113615849	113616238	shCONT_rep1
chr1	114298511	114299654	chr1	114353683	114356199	chr1	114354787	114355293	shCONT_rep1
chr1	114300688	114303220	chr1	114353683	114356199	chr1	114354787	114355293	shCONT_rep1
chr1	114304046	114305584	chr1	155241650	155245010	chr1	155242775	155243265	shCONT_rep1
chr1	114353683	114356199	chr1	114358560	114360969	chr1	114354787	114355293	shCONT_rep1
chr1	114353683	114356199	chr1	114362155	114364874	chr1	114354787	114355293	shCONT_rep1
chr1	114353683	114356199	chr1	114384004	114385425	chr1	114354787	114355293	shCONT_rep1
chr1	114353683	114356199	chr1	114446854	114450467	chr1	114354787	114355293	shCONT_rep1
chr1	114353683	114356199	chr1	114459337	114461200	chr1	114354787	114355293	shCONT_rep1
chr1	114353683	114356199	chr1	114471423	114473885	chr1	114354787	114355293	shCONT_rep1
chr1	114353683	114356199	chr1	114471423	114473885	chr1	114471916	114472386	shCONT_rep1
chr1	114353683	114356199	chr1	116658403	116661217	chr1	114354787	114355293	shCONT_rep1
chr1	114446854	114450467	chr1	114471423	114473885	chr1	114471916	114472386	shCONT_rep1
chr1	114452225	114455571	chr1	114471423	114473885	chr1	114471916	114472386	shCONT_rep1
chr1	114459337	114461200	chr1	114471423	114473885	chr1	114471916	114472386	shCONT_rep1
chr1	114468604	114469799	chr1	114471423	114473885	chr1	114471916	114472386	shCONT_rep1
chr1	114471423	114473885	chr1	114475300	114476691	chr1	114471916	114472386	shCONT_rep1
chr1	114471423	114473885	chr1	114477188	114478442	chr1	114471916	114472386	shCONT_rep1
chr1	114471423	114473885	chr1	114547117	114548705	chr1	114471916	114472386	shCONT_rep1
chr1	114471423	114473885	chr1	121483866	121486018	chr1	114471916	114472386	shCONT_rep1
chr1	1146041	1147371	chr1	1166510	1167951	chr1	1167023	1167810	shCONT_rep1
chr1	115257875	115260916	chr1	115280364	115281515	chr1	115259363	115259614	shCONT_rep1
chr1	115298183	115300976	chr1	115425467	115426600	chr1	115300025	115300818	shCONT_rep1
chr1	1153089	1155805	chr1	1166510	1167951	chr1	1167023	1167810	shCONT_rep1
chr1	1158240	1159414	chr1	1166510	1167951	chr1	1167023	1167810	shCONT_rep1
chr1	1160232	1161585	chr1	1166510	1167951	chr1	1167023	1167810	shCONT_rep1
chr1	1164946	1166178	chr1	1166510	1167951	chr1	1167023	1167810	shCONT_rep1
chr1	1166510	1167951	chr1	1172312	1175868	chr1	1167023	1167810	shCONT_rep1
chr1	1166510	1167951	chr1	1176479	1177612	chr1	1167023	1167810	shCONT_rep1
chr1	1166510	1167951	chr1	1237993	1242114	chr1	1167023	1167810	shCONT_rep1
chr1	116686133	116687266	chr1	117110820	117114888	chr1	117113646	117113932	shCONT_rep1
chr1	117045241	117047997	chr1	117110820	117114888	chr1	117113646	117113932	shCONT_rep1
chr1	117055905	117057069	chr1	117110820	117114888	chr1	117113646	117113932	shCONT_rep1
chr1	11706038	11711546	chr1	11863043	11867124	chr1	11865865	11866363	shCONT_rep1
chr1	117097859	117100131	chr1	117110820	117114888	chr1	117113646	117113932	shCONT_rep1
chr1	117100638	117101860	chr1	117110820	117114888	chr1	117113646	117113932	shCONT_rep1
chr1	117107381	117108664	chr1	117110820	117114888	chr1	117113646	117113932	shCONT_rep1
chr1	117110820	117114888	chr1	117118407	117119618	chr1	117113646	117113932	shCONT_rep1
chr1	117110820	117114888	chr1	117122857	117125088	chr1	117113646	117113932	shCONT_rep1
chr1	117110820	117114888	chr1	117128967	117132410	chr1	117113646	117113932	shCONT_rep1
chr1	117110820	117114888	chr1	117240101	117242110	chr1	117113646	117113932	shCONT_rep1
chr1	117110820	117114888	chr1	117274366	117275644	chr1	117113646	117113932	shCONT_rep1
chr1	117110820	117114888	chr1	117279986	117281521	chr1	117113646	117113932	shCONT_rep1
chr1	117110820	117114888	chr1	117593522	117595206	chr1	117113646	117113932	shCONT_rep1
chr1	11714917	11718690	chr1	11863043	11867124	chr1	11865865	11866363	shCONT_rep1
chr1	1172312	1175868	chr1	1207722	1209794	chr1	1208821	1209448	shCONT_rep1
chr1	11741290	11743673	chr1	11863043	11867124	chr1	11865865	11866363	shCONT_rep1
chr1	11750849	11754392	chr1	11863043	11867124	chr1	11865865	11866363	shCONT_rep1
chr1	11770691	11772456	chr1	11863043	11867124	chr1	11865865	11866363	shCONT_rep1
chr1	11778758	11781472	chr1	11863043	11867124	chr1	11865865	11866363	shCONT_rep1
chr1	11799679	11801145	chr1	11863043	11867124	chr1	11865865	11866363	shCONT_rep1
chr1	11808769	11811165	chr1	11863043	11867124	chr1	11865865	11866363	shCONT_rep1
chr1	11822070	11827150	chr1	11863043	11867124	chr1	11865865	11866363	shCONT_rep1
chr1	11831499	11832909	chr1	11863043	11867124	chr1	11865865	11866363	shCONT_rep1
chr1	11835327	11837150	chr1	11863043	11867124	chr1	11865865	11866363	shCONT_rep1
chr1	11839327	11840590	chr1	11863043	11867124	chr1	11865865	11866363	shCONT_rep1
chr1	11843726	11846158	chr1	12038148	12041459	chr1	12040289	12040820	shCONT_rep1
chr1	11846584	11850119	chr1	11863043	11867124	chr1	11865865	11866363	shCONT_rep1
chr1	11851665	11852962	chr1	11863043	11867124	chr1	11865865	11866363	shCONT_rep1
chr1	11855681	11856887	chr1	11863043	11867124	chr1	11865865	11866363	shCONT_rep1
chr1	11860270	11861746	chr1	11863043	11867124	chr1	11865865	11866363	shCONT_rep1
chr1	11863043	11867124	chr1	11875792	11879718	chr1	11865865	11866363	shCONT_rep1
chr1	11863043	11867124	chr1	11898044	11900815	chr1	11865865	11866363	shCONT_rep1
chr1	11863043	11867124	chr1	11928982	11930670	chr1	11865865	11866363	shCONT_rep1
chr1	11863043	11867124	chr1	11942367	11943585	chr1	11865865	11866363	shCONT_rep1
chr1	11863043	11867124	chr1	11953035	11954478	chr1	11865865	11866363	shCONT_rep1
chr1	11863043	11867124	chr1	12008652	12011910	chr1	11865865	11866363	shCONT_rep1
chr1	11863043	11867124	chr1	12016358	12017695	chr1	11865865	11866363	shCONT_rep1
chr1	11863043	11867124	chr1	12038148	12041459	chr1	11865865	11866363	shCONT_rep1
chr1	11863043	11867124	chr1	12038148	12041459	chr1	12040289	12040820	shCONT_rep1
chr1	1190582	1196735	chr1	1207722	1209794	chr1	1208821	1209448	shCONT_rep1
chr1	119531475	119533668	chr1	119682400	119684594	chr1	119683087	119683476	shCONT_rep1
chr1	119674208	119676177	chr1	119682400	119684594	chr1	119683087	119683476	shCONT_rep1
chr1	119676800	119678066	chr1	119682400	119684594	chr1	119683087	119683476	shCONT_rep1
chr1	119682400	119684594	chr1	121483866	121486018	chr1	119683087	119683476	shCONT_rep1
chr1	11980079	11987367	chr1	12038148	12041459	chr1	12040289	12040820	shCONT_rep1
chr1	1199946	1202191	chr1	1207722	1209794	chr1	1208821	1209448	shCONT_rep1
chr1	12004096	12005530	chr1	12038148	12041459	chr1	12040289	12040820	shCONT_rep1
chr1	12008652	12011910	chr1	12038148	12041459	chr1	12040289	12040820	shCONT_rep1
chr1	12018267	12019450	chr1	12038148	12041459	chr1	12040289	12040820	shCONT_rep1
chr1	120185165	120186431	chr1	144945560	144948802	chr1	144946806	144947106	shCONT_rep1
chr1	12019824	12021018	chr1	12038148	12041459	chr1	12040289	12040820	shCONT_rep1
chr1	12032161	12033778	chr1	12038148	12041459	chr1	12040289	12040820	shCONT_rep1
chr1	12034052	12035318	chr1	12038148	12041459	chr1	12040289	12040820	shCONT_rep1
chr1	12038148	12041459	chr1	12044025	12045367	chr1	12040289	12040820	shCONT_rep1
chr1	12038148	12041459	chr1	12048886	12051834	chr1	12040289	12040820	shCONT_rep1
chr1	12038148	12041459	chr1	12055449	12058144	chr1	12040289	12040820	shCONT_rep1
chr1	12038148	12041459	chr1	12064349	12067848	chr1	12040289	12040820	shCONT_rep1
chr1	12038148	12041459	chr1	12078234	12080501	chr1	12040289	12040820	shCONT_rep1
chr1	12038148	12041459	chr1	12081288	12083215	chr1	12040289	12040820	shCONT_rep1
chr1	12038148	12041459	chr1	12106164	12108228	chr1	12040289	12040820	shCONT_rep1
chr1	12038148	12041459	chr1	12145543	12149187	chr1	12040289	12040820	shCONT_rep1
chr1	1205213	1207119	chr1	1207722	1209794	chr1	1208821	1209448	shCONT_rep1
chr1	1207722	1209794	chr1	1210204	1212300	chr1	1208821	1209448	shCONT_rep1
chr1	1207722	1209794	chr1	1216243	1218301	chr1	1208821	1209448	shCONT_rep1
chr1	1207722	1209794	chr1	1219735	1221730	chr1	1208821	1209448	shCONT_rep1
chr1	1207722	1209794	chr1	1225556	1229276	chr1	1208821	1209448	shCONT_rep1
chr1	1207722	1209794	chr1	1237993	1242114	chr1	1208821	1209448	shCONT_rep1
chr1	1207722	1209794	chr1	1277580	1279356	chr1	1208821	1209448	shCONT_rep1
chr1	12110764	12114978	chr1	12289119	12292121	chr1	12289937	12290392	shCONT_rep1
chr1	121351379	121352573	chr1	121353060	121356372	chr1	121351813	121352360	shCONT_rep1
chr1	121351379	121352573	chr1	121353060	121356372	chr1	121354957	121355285	shCONT_rep1
chr1	121351379	121352573	chr1	121353060	121356372	chr1	121354068	121354511	shCONT_rep1
chr1	121351379	121352573	chr1	121353060	121356372	chr1	121352846	121353179	shCONT_rep1
chr1	121351379	121352573	chr1	121483866	121486018	chr1	121351813	121352360	shCONT_rep1
chr1	121353060	121356372	chr1	121483866	121486018	chr1	121354957	121355285	shCONT_rep1
chr1	121353060	121356372	chr1	121483866	121486018	chr1	121354068	121354511	shCONT_rep1
chr1	121353060	121356372	chr1	121483866	121486018	chr1	121352846	121353179	shCONT_rep1
chr1	121483866	121486018	chr1	153604542	153608800	chr1	153606285	153606859	shCONT_rep1
chr1	121483866	121486018	chr1	166843335	166847863	chr1	166845221	166845716	shCONT_rep1
chr1	121483866	121486018	chr1	167904267	167907010	chr1	167905221	167905755	shCONT_rep1
chr1	121483866	121486018	chr1	179921176	179925031	chr1	179923590	179924256	shCONT_rep1
chr1	121483866	121486018	chr1	184001279	184009297	chr1	184006370	184006690	shCONT_rep1
chr1	121483866	121486018	chr1	226247156	226250756	chr1	226250210	226250969	shCONT_rep1
chr1	121483866	121486018	chr1	226247156	226250756	chr1	226249454	226249925	shCONT_rep1
chr1	121483866	121486018	chr1	243416751	243420591	chr1	243417757	243417973	shCONT_rep1
chr1	12169251	12172533	chr1	12289119	12292121	chr1	12289937	12290392	shCONT_rep1
chr1	12178573	12179940	chr1	12289119	12292121	chr1	12289937	12290392	shCONT_rep1
chr1	12180220	12182033	chr1	12289119	12292121	chr1	12289937	12290392	shCONT_rep1
chr1	12184481	12189945	chr1	12289119	12292121	chr1	12289937	12290392	shCONT_rep1
chr1	12192618	12196479	chr1	12289119	12292121	chr1	12289937	12290392	shCONT_rep1
chr1	12245901	12247339	chr1	12289119	12292121	chr1	12289937	12290392	shCONT_rep1
chr1	1225556	1229276	chr1	1334695	1338668	chr1	1334205	1334977	shCONT_rep1
chr1	12262021	12263182	chr1	12289119	12292121	chr1	12289937	12290392	shCONT_rep1
chr1	12266300	12271376	chr1	12289119	12292121	chr1	12289937	12290392	shCONT_rep1
chr1	12275341	12276840	chr1	12289119	12292121	chr1	12289937	12290392	shCONT_rep1
chr1	12277873	12279007	chr1	12289119	12292121	chr1	12289937	12290392	shCONT_rep1
chr1	12280382	12283299	chr1	12289119	12292121	chr1	12289937	12290392	shCONT_rep1
chr1	12285194	12286460	chr1	12289119	12292121	chr1	12289937	12290392	shCONT_rep1
chr1	12289119	12292121	chr1	12298965	12300304	chr1	12289937	12290392	shCONT_rep1
chr1	12289119	12292121	chr1	12302859	12306783	chr1	12289937	12290392	shCONT_rep1
chr1	12289119	12292121	chr1	12452141	12453644	chr1	12289937	12290392	shCONT_rep1
chr1	12289119	12292121	chr1	12661630	12664480	chr1	12289937	12290392	shCONT_rep1
chr1	12289119	12292121	chr1	12677780	12682102	chr1	12289937	12290392	shCONT_rep1
chr1	12289119	12292121	chr1	12822815	12824145	chr1	12289937	12290392	shCONT_rep1
chr1	1277580	1279356	chr1	1334695	1338668	chr1	1334205	1334977	shCONT_rep1
chr1	1286355	1289769	chr1	1334695	1338668	chr1	1334205	1334977	shCONT_rep1
chr1	1293386	1296207	chr1	1334695	1338668	chr1	1334205	1334977	shCONT_rep1
chr1	1293386	1296207	chr1	1341989	1343817	chr1	1342170	1342905	shCONT_rep1
chr1	1307043	1308636	chr1	1334695	1338668	chr1	1334205	1334977	shCONT_rep1
chr1	1311049	1312363	chr1	1334695	1338668	chr1	1334205	1334977	shCONT_rep1
chr1	1315282	1316593	chr1	1334695	1338668	chr1	1334205	1334977	shCONT_rep1
chr1	1320557	1321934	chr1	1334695	1338668	chr1	1334205	1334977	shCONT_rep1
chr1	1322379	1323512	chr1	1334695	1338668	chr1	1334205	1334977	shCONT_rep1
chr1	1332069	1334179	chr1	1334695	1338668	chr1	1334205	1334977	shCONT_rep1
chr1	1332069	1334179	chr1	1341989	1343817	chr1	1342170	1342905	shCONT_rep1
chr1	1334695	1338668	chr1	1341989	1343817	chr1	1334205	1334977	shCONT_rep1
chr1	1334695	1338668	chr1	1341989	1343817	chr1	1342170	1342905	shCONT_rep1
chr1	1334695	1338668	chr1	1356254	1358646	chr1	1334205	1334977	shCONT_rep1
chr1	1334695	1338668	chr1	1361993	1363126	chr1	1334205	1334977	shCONT_rep1
chr1	1334695	1338668	chr1	1365035	1366218	chr1	1334205	1334977	shCONT_rep1
chr1	1334695	1338668	chr1	1366517	1369273	chr1	1334205	1334977	shCONT_rep1
chr1	1334695	1338668	chr1	1375212	1378644	chr1	1334205	1334977	shCONT_rep1
chr1	1334695	1338668	chr1	1407848	1410113	chr1	1334205	1334977	shCONT_rep1
chr1	1334695	1338668	chr1	1471132	1473570	chr1	1334205	1334977	shCONT_rep1
chr1	1334695	1338668	chr1	1655179	1656445	chr1	1334205	1334977	shCONT_rep1
chr1	1341989	1343817	chr1	1345593	1348632	chr1	1342170	1342905	shCONT_rep1
chr1	1341989	1343817	chr1	1353915	1355664	chr1	1342170	1342905	shCONT_rep1
chr1	1341989	1343817	chr1	1366517	1369273	chr1	1342170	1342905	shCONT_rep1
chr1	1341989	1343817	chr1	1375212	1378644	chr1	1342170	1342905	shCONT_rep1
chr1	1341989	1343817	chr1	1445763	1447020	chr1	1342170	1342905	shCONT_rep1
chr1	13910241	13913531	chr1	14023505	14028591	chr1	14026481	14027010	shCONT_rep1
chr1	13987747	13990954	chr1	14023505	14028591	chr1	14026481	14027010	shCONT_rep1
chr1	14012976	14015033	chr1	14023505	14028591	chr1	14026481	14027010	shCONT_rep1
chr1	14018543	14019676	chr1	14023505	14028591	chr1	14026481	14027010	shCONT_rep1
chr1	14023505	14028591	chr1	14034424	14035751	chr1	14026481	14027010	shCONT_rep1
chr1	14023505	14028591	chr1	14048094	14050241	chr1	14026481	14027010	shCONT_rep1
chr1	14023505	14028591	chr1	14074677	14079281	chr1	14026481	14027010	shCONT_rep1
chr1	14023505	14028591	chr1	14087517	14089382	chr1	14026481	14027010	shCONT_rep1
chr1	14023505	14028591	chr1	14094676	14095999	chr1	14026481	14027010	shCONT_rep1
chr1	14023505	14028591	chr1	14115662	14117722	chr1	14026481	14027010	shCONT_rep1
chr1	14023505	14028591	chr1	14126137	14129122	chr1	14026481	14027010	shCONT_rep1
chr1	14023505	14028591	chr1	14234582	14237040	chr1	14026481	14027010	shCONT_rep1
chr1	14023505	14028591	chr1	173978019	173980043	chr1	14026481	14027010	shCONT_rep1
chr1	14023505	14028591	chr1	24621508	24622754	chr1	14026481	14027010	shCONT_rep1
chr1	144004906	144012046	chr1	206784332	206788273	chr1	206785564	206786041	shCONT_rep1
chr1	144932661	144934653	chr1	144945560	144948802	chr1	144946806	144947106	shCONT_rep1
chr1	144939983	144943707	chr1	144945560	144948802	chr1	144946806	144947106	shCONT_rep1
chr1	144945560	144948802	chr1	144949599	144950766	chr1	144946806	144947106	shCONT_rep1
chr1	144945560	144948802	chr1	144991282	144996783	chr1	144946806	144947106	shCONT_rep1
chr1	144945560	144948802	chr1	145001961	145006472	chr1	144946806	144947106	shCONT_rep1
chr1	144945560	144948802	chr1	145030291	145034691	chr1	144946806	144947106	shCONT_rep1
chr1	144945560	144948802	chr1	145044408	145047606	chr1	144946806	144947106	shCONT_rep1
chr1	144945560	144948802	chr1	145082872	145084846	chr1	144946806	144947106	shCONT_rep1
chr1	144945560	144948802	chr1	154277781	154279562	chr1	144946806	144947106	shCONT_rep1
chr1	144985548	144987744	chr1	145098407	145101555	chr1	145099154	145099598	shCONT_rep1
chr1	144985548	144987744	chr1	145098407	145101555	chr1	145100148	145100381	shCONT_rep1
chr1	145001961	145006472	chr1	219346506	219348967	chr1	219347024	219347480	shCONT_rep1
chr1	145030291	145034691	chr1	145098407	145101555	chr1	145099154	145099598	shCONT_rep1
chr1	145030291	145034691	chr1	145098407	145101555	chr1	145100148	145100381	shCONT_rep1
chr1	145030291	145034691	chr1	151252722	151256840	chr1	151255044	151255365	shCONT_rep1
chr1	145061047	145065406	chr1	145098407	145101555	chr1	145099154	145099598	shCONT_rep1
chr1	145061047	145065406	chr1	145098407	145101555	chr1	145100148	145100381	shCONT_rep1
chr1	145067752	145071315	chr1	145098407	145101555	chr1	145099154	145099598	shCONT_rep1
chr1	145067752	145071315	chr1	145098407	145101555	chr1	145100148	145100381	shCONT_rep1
chr1	145076592	145078676	chr1	145098407	145101555	chr1	145099154	145099598	shCONT_rep1
chr1	145076592	145078676	chr1	145098407	145101555	chr1	145100148	145100381	shCONT_rep1
chr1	145082872	145084846	chr1	145098407	145101555	chr1	145099154	145099598	shCONT_rep1
chr1	145082872	145084846	chr1	145098407	145101555	chr1	145100148	145100381	shCONT_rep1
chr1	145086773	145089700	chr1	145098407	145101555	chr1	145099154	145099598	shCONT_rep1
chr1	145086773	145089700	chr1	145098407	145101555	chr1	145100148	145100381	shCONT_rep1
chr1	145091212	145093326	chr1	145098407	145101555	chr1	145099154	145099598	shCONT_rep1
chr1	145091212	145093326	chr1	145098407	145101555	chr1	145100148	145100381	shCONT_rep1
chr1	145098407	145101555	chr1	145102204	145103478	chr1	145099154	145099598	shCONT_rep1
chr1	145098407	145101555	chr1	145102204	145103478	chr1	145100148	145100381	shCONT_rep1
chr1	145098407	145101555	chr1	145104130	145107480	chr1	145099154	145099598	shCONT_rep1
chr1	145098407	145101555	chr1	145104130	145107480	chr1	145100148	145100381	shCONT_rep1
chr1	145098407	145101555	chr1	145110071	145112977	chr1	145099154	145099598	shCONT_rep1
chr1	145098407	145101555	chr1	145110071	145112977	chr1	145100148	145100381	shCONT_rep1
chr1	145098407	145101555	chr1	145114869	145117863	chr1	145099154	145099598	shCONT_rep1
chr1	145098407	145101555	chr1	145114869	145117863	chr1	145100148	145100381	shCONT_rep1
chr1	145098407	145101555	chr1	172541360	172542493	chr1	145099154	145099598	shCONT_rep1
chr1	145098407	145101555	chr1	172541360	172542493	chr1	145100148	145100381	shCONT_rep1
chr1	145098407	145101555	chr1	236060928	236062329	chr1	145099154	145099598	shCONT_rep1
chr1	145098407	145101555	chr1	236060928	236062329	chr1	145100148	145100381	shCONT_rep1
chr1	145288728	145294055	chr1	145742859	145746139	chr1	145290588	145291133	shCONT_rep1
chr1	145288728	145294055	chr1	145742859	145746139	chr1	145293179	145293406	shCONT_rep1
chr1	145288728	145294055	chr1	160687139	160690928	chr1	145290588	145291133	shCONT_rep1
chr1	145288728	145294055	chr1	160687139	160690928	chr1	145293179	145293406	shCONT_rep1
chr1	145288728	145294055	chr1	180939784	180942267	chr1	145290588	145291133	shCONT_rep1
chr1	145288728	145294055	chr1	180939784	180942267	chr1	145293179	145293406	shCONT_rep1
chr1	145402194	145405128	chr1	145587942	145590106	chr1	145589218	145589529	shCONT_rep1
chr1	145414172	145416237	chr1	145587942	145590106	chr1	145589218	145589529	shCONT_rep1
chr1	145422029	145426286	chr1	145515202	145518889	chr1	145516256	145516483	shCONT_rep1
chr1	145422029	145426286	chr1	145587942	145590106	chr1	145589218	145589529	shCONT_rep1
chr1	145426570	145427889	chr1	145573398	145577090	chr1	145575840	145576312	shCONT_rep1
chr1	145426570	145427889	chr1	145587942	145590106	chr1	145589218	145589529	shCONT_rep1
chr1	145436722	145438786	chr1	145503573	145508110	chr1	145507336	145507599	shCONT_rep1
chr1	145436722	145438786	chr1	145515202	145518889	chr1	145516256	145516483	shCONT_rep1
chr1	145439844	145443022	chr1	145503573	145508110	chr1	145507336	145507599	shCONT_rep1
chr1	145446774	145451237	chr1	145503573	145508110	chr1	145507336	145507599	shCONT_rep1
chr1	145446774	145451237	chr1	145515202	145518889	chr1	145516256	145516483	shCONT_rep1
chr1	145446774	145451237	chr1	145587942	145590106	chr1	145589218	145589529	shCONT_rep1
chr1	145455415	145457891	chr1	145503573	145508110	chr1	145507336	145507599	shCONT_rep1
chr1	145455415	145457891	chr1	145515202	145518889	chr1	145516256	145516483	shCONT_rep1
chr1	145466824	145469234	chr1	145515202	145518889	chr1	145516256	145516483	shCONT_rep1
chr1	145469963	145471347	chr1	145515202	145518889	chr1	145516256	145516483	shCONT_rep1
chr1	145472736	145474842	chr1	145503573	145508110	chr1	145507336	145507599	shCONT_rep1
chr1	145472736	145474842	chr1	145587942	145590106	chr1	145589218	145589529	shCONT_rep1
chr1	145476812	145477972	chr1	145503573	145508110	chr1	145507336	145507599	shCONT_rep1
chr1	145479472	145481987	chr1	145503573	145508110	chr1	145507336	145507599	shCONT_rep1
chr1	145486473	145488785	chr1	145503573	145508110	chr1	145507336	145507599	shCONT_rep1
chr1	145486473	145488785	chr1	145515202	145518889	chr1	145516256	145516483	shCONT_rep1
chr1	145489319	145490701	chr1	145503573	145508110	chr1	145507336	145507599	shCONT_rep1
chr1	145495573	145498626	chr1	145503573	145508110	chr1	145507336	145507599	shCONT_rep1
chr1	145495573	145498626	chr1	145515202	145518889	chr1	145516256	145516483	shCONT_rep1
chr1	145503573	145508110	chr1	145512643	145513895	chr1	145507336	145507599	shCONT_rep1
chr1	145503573	145508110	chr1	145515202	145518889	chr1	145507336	145507599	shCONT_rep1
chr1	145503573	145508110	chr1	145515202	145518889	chr1	145516256	145516483	shCONT_rep1
chr1	145503573	145508110	chr1	145523016	145525499	chr1	145507336	145507599	shCONT_rep1
chr1	145503573	145508110	chr1	145533014	145535985	chr1	145507336	145507599	shCONT_rep1
chr1	145503573	145508110	chr1	145538543	145539676	chr1	145507336	145507599	shCONT_rep1
chr1	145503573	145508110	chr1	145546404	145549965	chr1	145507336	145507599	shCONT_rep1
chr1	145503573	145508110	chr1	145573398	145577090	chr1	145507336	145507599	shCONT_rep1
chr1	145503573	145508110	chr1	145573398	145577090	chr1	145575840	145576312	shCONT_rep1
chr1	145503573	145508110	chr1	145593002	145595529	chr1	145507336	145507599	shCONT_rep1
chr1	145512643	145513895	chr1	145515202	145518889	chr1	145516256	145516483	shCONT_rep1
chr1	145515202	145518889	chr1	145523016	145525499	chr1	145516256	145516483	shCONT_rep1
chr1	145515202	145518889	chr1	145526277	145529873	chr1	145516256	145516483	shCONT_rep1
chr1	145515202	145518889	chr1	145531511	145532644	chr1	145516256	145516483	shCONT_rep1
chr1	145515202	145518889	chr1	145533014	145535985	chr1	145516256	145516483	shCONT_rep1
chr1	145515202	145518889	chr1	145542392	145545677	chr1	145516256	145516483	shCONT_rep1
chr1	145515202	145518889	chr1	145546404	145549965	chr1	145516256	145516483	shCONT_rep1
chr1	145515202	145518889	chr1	145579581	145582006	chr1	145516256	145516483	shCONT_rep1
chr1	145515202	145518889	chr1	145587942	145590106	chr1	145516256	145516483	shCONT_rep1
chr1	145515202	145518889	chr1	145587942	145590106	chr1	145589218	145589529	shCONT_rep1
chr1	145523016	145525499	chr1	145573398	145577090	chr1	145575840	145576312	shCONT_rep1
chr1	145523016	145525499	chr1	145587942	145590106	chr1	145589218	145589529	shCONT_rep1
chr1	145526277	145529873	chr1	145573398	145577090	chr1	145575840	145576312	shCONT_rep1
chr1	145526277	145529873	chr1	145587942	145590106	chr1	145589218	145589529	shCONT_rep1
chr1	145533014	145535985	chr1	145573398	145577090	chr1	145575840	145576312	shCONT_rep1
chr1	145542392	145545677	chr1	145573398	145577090	chr1	145575840	145576312	shCONT_rep1
chr1	145546404	145549965	chr1	145573398	145577090	chr1	145575840	145576312	shCONT_rep1
chr1	145554573	145555760	chr1	145573398	145577090	chr1	145575840	145576312	shCONT_rep1
chr1	145554573	145555760	chr1	145587942	145590106	chr1	145589218	145589529	shCONT_rep1
chr1	145556078	145557553	chr1	145573398	145577090	chr1	145575840	145576312	shCONT_rep1
chr1	145560160	145564120	chr1	145573398	145577090	chr1	145575840	145576312	shCONT_rep1
chr1	145560160	145564120	chr1	145587942	145590106	chr1	145589218	145589529	shCONT_rep1
chr1	145566214	145567947	chr1	145573398	145577090	chr1	145575840	145576312	shCONT_rep1
chr1	145573398	145577090	chr1	145577750	145578993	chr1	145575840	145576312	shCONT_rep1
chr1	145573398	145577090	chr1	145579581	145582006	chr1	145575840	145576312	shCONT_rep1
chr1	145573398	145577090	chr1	145584267	145587097	chr1	145575840	145576312	shCONT_rep1
chr1	145573398	145577090	chr1	145587942	145590106	chr1	145575840	145576312	shCONT_rep1
chr1	145573398	145577090	chr1	145587942	145590106	chr1	145589218	145589529	shCONT_rep1
chr1	145573398	145577090	chr1	145593002	145595529	chr1	145575840	145576312	shCONT_rep1
chr1	145573398	145577090	chr1	224778728	224779885	chr1	145575840	145576312	shCONT_rep1
chr1	145577750	145578993	chr1	145587942	145590106	chr1	145589218	145589529	shCONT_rep1
chr1	145579581	145582006	chr1	145587942	145590106	chr1	145589218	145589529	shCONT_rep1
chr1	145584267	145587097	chr1	145587942	145590106	chr1	145589218	145589529	shCONT_rep1
chr1	145587942	145590106	chr1	145593002	145595529	chr1	145589218	145589529	shCONT_rep1
chr1	145587942	145590106	chr1	145601186	145602991	chr1	145589218	145589529	shCONT_rep1
chr1	145587942	145590106	chr1	145605321	145608841	chr1	145589218	145589529	shCONT_rep1
chr1	145587942	145590106	chr1	145742859	145746139	chr1	145589218	145589529	shCONT_rep1
chr1	145722985	145724303	chr1	172501054	172503245	chr1	172502196	172502570	shCONT_rep1
chr1	146627566	146630658	chr1	146642884	146646389	chr1	146643542	146644291	shCONT_rep1
chr1	146637785	146639047	chr1	146642884	146646389	chr1	146643542	146644291	shCONT_rep1
chr1	146642884	146646389	chr1	146651668	146654070	chr1	146643542	146644291	shCONT_rep1
chr1	146642884	146646389	chr1	146708112	146709844	chr1	146643542	146644291	shCONT_rep1
chr1	146642884	146646389	chr1	146712124	146715357	chr1	146643542	146644291	shCONT_rep1
chr1	146642884	146646389	chr1	146718297	146720215	chr1	146643542	146644291	shCONT_rep1
chr1	146642884	146646389	chr1	146722074	146723368	chr1	146643542	146644291	shCONT_rep1
chr1	146642884	146646389	chr1	147095176	147097231	chr1	146643542	146644291	shCONT_rep1
chr1	149815827	149817772	chr1	149856787	149859055	chr1	149858521	149858741	shCONT_rep1
chr1	149818392	149819681	chr1	149856787	149859055	chr1	149858521	149858741	shCONT_rep1
chr1	149847564	149853395	chr1	149856787	149859055	chr1	149858521	149858741	shCONT_rep1
chr1	149847564	149853395	chr1	149899034	149901186	chr1	149899424	149899969	shCONT_rep1
chr1	149856787	149859055	chr1	149861240	149862686	chr1	149858521	149858741	shCONT_rep1
chr1	149856787	149859055	chr1	149863074	149864259	chr1	149858521	149858741	shCONT_rep1
chr1	149856787	149859055	chr1	149882066	149883199	chr1	149858521	149858741	shCONT_rep1
chr1	149856787	149859055	chr1	149905735	149908227	chr1	149858521	149858741	shCONT_rep1
chr1	149856787	149859055	chr1	149909304	149913583	chr1	149858521	149858741	shCONT_rep1
chr1	149856787	149859055	chr1	149920176	149924204	chr1	149858521	149858741	shCONT_rep1
chr1	149856787	149859055	chr1	149934087	149935345	chr1	149858521	149858741	shCONT_rep1
chr1	149856787	149859055	chr1	149959699	149963620	chr1	149858521	149858741	shCONT_rep1
chr1	149856787	149859055	chr1	149979730	149985275	chr1	149858521	149858741	shCONT_rep1
chr1	149856787	149859055	chr1	150047661	150048911	chr1	149858521	149858741	shCONT_rep1
chr1	149870524	149872774	chr1	149899034	149901186	chr1	149899424	149899969	shCONT_rep1
chr1	149880660	149881793	chr1	149899034	149901186	chr1	149899424	149899969	shCONT_rep1
chr1	149886428	149888088	chr1	149899034	149901186	chr1	149899424	149899969	shCONT_rep1
chr1	149891633	149894345	chr1	149899034	149901186	chr1	149899424	149899969	shCONT_rep1
chr1	149895096	149896459	chr1	149899034	149901186	chr1	149899424	149899969	shCONT_rep1
chr1	149899034	149901186	chr1	149902557	149904561	chr1	149899424	149899969	shCONT_rep1
chr1	149899034	149901186	chr1	149905735	149908227	chr1	149899424	149899969	shCONT_rep1
chr1	149899034	149901186	chr1	149909304	149913583	chr1	149899424	149899969	shCONT_rep1
chr1	149899034	149901186	chr1	150160797	150165435	chr1	149899424	149899969	shCONT_rep1
chr1	1500382	1502481	chr1	1509760	1511241	chr1	1509705	1510329	shCONT_rep1
chr1	150182460	150184468	chr1	150550515	150553532	chr1	150551621	150551880	shCONT_rep1
chr1	150245784	150246930	chr1	150335844	150340417	chr1	150336038	150336468	shCONT_rep1
chr1	150245784	150246930	chr1	150335844	150340417	chr1	150336937	150337411	shCONT_rep1
chr1	150253244	150255908	chr1	150335844	150340417	chr1	150336038	150336468	shCONT_rep1
chr1	150253244	150255908	chr1	150335844	150340417	chr1	150336937	150337411	shCONT_rep1
chr1	150263885	150267538	chr1	150335844	150340417	chr1	150336038	150336468	shCONT_rep1
chr1	150263885	150267538	chr1	150335844	150340417	chr1	150336937	150337411	shCONT_rep1
chr1	150263885	150267538	chr1	150944303	150947092	chr1	150946596	150947344	shCONT_rep1
chr1	150313792	150317774	chr1	150335844	150340417	chr1	150336038	150336468	shCONT_rep1
chr1	150313792	150317774	chr1	150335844	150340417	chr1	150336937	150337411	shCONT_rep1
chr1	150318266	150321154	chr1	150335844	150340417	chr1	150336038	150336468	shCONT_rep1
chr1	150318266	150321154	chr1	150335844	150340417	chr1	150336937	150337411	shCONT_rep1
chr1	150330963	150332766	chr1	150335844	150340417	chr1	150336038	150336468	shCONT_rep1
chr1	150330963	150332766	chr1	150335844	150340417	chr1	150336937	150337411	shCONT_rep1
chr1	150335844	150340417	chr1	150342077	150343377	chr1	150336038	150336468	shCONT_rep1
chr1	150335844	150340417	chr1	150342077	150343377	chr1	150336937	150337411	shCONT_rep1
chr1	150335844	150340417	chr1	150344532	150345784	chr1	150336038	150336468	shCONT_rep1
chr1	150335844	150340417	chr1	150344532	150345784	chr1	150336937	150337411	shCONT_rep1
chr1	150335844	150340417	chr1	150347081	150349333	chr1	150336038	150336468	shCONT_rep1
chr1	150335844	150340417	chr1	150347081	150349333	chr1	150336937	150337411	shCONT_rep1
chr1	150335844	150340417	chr1	150350399	150351722	chr1	150336038	150336468	shCONT_rep1
chr1	150335844	150340417	chr1	150350399	150351722	chr1	150336937	150337411	shCONT_rep1
chr1	150335844	150340417	chr1	150352925	150354136	chr1	150336038	150336468	shCONT_rep1
chr1	150335844	150340417	chr1	150352925	150354136	chr1	150336937	150337411	shCONT_rep1
chr1	150335844	150340417	chr1	150354558	150355765	chr1	150336038	150336468	shCONT_rep1
chr1	150335844	150340417	chr1	150354558	150355765	chr1	150336937	150337411	shCONT_rep1
chr1	150335844	150340417	chr1	150375910	150380543	chr1	150336038	150336468	shCONT_rep1
chr1	150335844	150340417	chr1	150375910	150380543	chr1	150336937	150337411	shCONT_rep1
chr1	150335844	150340417	chr1	150381918	150383248	chr1	150336038	150336468	shCONT_rep1
chr1	150335844	150340417	chr1	150381918	150383248	chr1	150336937	150337411	shCONT_rep1
chr1	150335844	150340417	chr1	150409026	150412718	chr1	150336038	150336468	shCONT_rep1
chr1	150335844	150340417	chr1	150409026	150412718	chr1	150336937	150337411	shCONT_rep1
chr1	150335844	150340417	chr1	150419229	150424920	chr1	150336038	150336468	shCONT_rep1
chr1	150335844	150340417	chr1	150419229	150424920	chr1	150336937	150337411	shCONT_rep1
chr1	150335844	150340417	chr1	150436433	150438318	chr1	150336038	150336468	shCONT_rep1
chr1	150335844	150340417	chr1	150436433	150438318	chr1	150336937	150337411	shCONT_rep1
chr1	150335844	150340417	chr1	150440955	150443722	chr1	150336038	150336468	shCONT_rep1
chr1	150335844	150340417	chr1	150440955	150443722	chr1	150336937	150337411	shCONT_rep1
chr1	150335844	150340417	chr1	150444038	150446564	chr1	150336038	150336468	shCONT_rep1
chr1	150335844	150340417	chr1	150444038	150446564	chr1	150336937	150337411	shCONT_rep1
chr1	150335844	150340417	chr1	150449989	150451160	chr1	150336038	150336468	shCONT_rep1
chr1	150335844	150340417	chr1	150449989	150451160	chr1	150336937	150337411	shCONT_rep1
chr1	150335844	150340417	chr1	150486540	150488983	chr1	150336038	150336468	shCONT_rep1
chr1	150335844	150340417	chr1	150486540	150488983	chr1	150336937	150337411	shCONT_rep1
chr1	150335844	150340417	chr1	150501546	150502680	chr1	150336038	150336468	shCONT_rep1
chr1	150335844	150340417	chr1	150501546	150502680	chr1	150336937	150337411	shCONT_rep1
chr1	150335844	150340417	chr1	155989733	155995043	chr1	150336038	150336468	shCONT_rep1
chr1	150335844	150340417	chr1	155989733	155995043	chr1	150336937	150337411	shCONT_rep1
chr1	150335844	150340417	chr1	203657183	203659295	chr1	150336038	150336468	shCONT_rep1
chr1	150335844	150340417	chr1	203657183	203659295	chr1	150336937	150337411	shCONT_rep1
chr1	150381918	150383248	chr1	151170664	151173069	chr1	151171291	151171511	shCONT_rep1
chr1	150455306	150456439	chr1	150847559	150849916	chr1	150848814	150849415	shCONT_rep1
chr1	150522019	150524049	chr1	150550515	150553532	chr1	150551621	150551880	shCONT_rep1
chr1	150525013	150528476	chr1	150550515	150553532	chr1	150551621	150551880	shCONT_rep1
chr1	150525013	150528476	chr1	150599231	150602724	chr1	150601781	150602195	shCONT_rep1
chr1	150532101	150535716	chr1	150550515	150553532	chr1	150551621	150551880	shCONT_rep1
chr1	150532101	150535716	chr1	150599231	150602724	chr1	150601781	150602195	shCONT_rep1
chr1	150532101	150535716	chr1	150847559	150849916	chr1	150848814	150849415	shCONT_rep1
chr1	150532101	150535716	chr1	150944303	150947092	chr1	150946596	150947344	shCONT_rep1
chr1	150536774	150541050	chr1	150550515	150553532	chr1	150551621	150551880	shCONT_rep1
chr1	150536774	150541050	chr1	150599231	150602724	chr1	150601781	150602195	shCONT_rep1
chr1	150544356	150545525	chr1	150550515	150553532	chr1	150551621	150551880	shCONT_rep1
chr1	150546881	150548014	chr1	150550515	150553532	chr1	150551621	150551880	shCONT_rep1
chr1	150550515	150553532	chr1	150556545	150558011	chr1	150551621	150551880	shCONT_rep1
chr1	150550515	150553532	chr1	150563772	150565034	chr1	150551621	150551880	shCONT_rep1
chr1	150550515	150553532	chr1	150566849	150568140	chr1	150551621	150551880	shCONT_rep1
chr1	150550515	150553532	chr1	150568980	150570670	chr1	150551621	150551880	shCONT_rep1
chr1	150550515	150553532	chr1	150576038	150579928	chr1	150551621	150551880	shCONT_rep1
chr1	150550515	150553532	chr1	150582620	150586627	chr1	150551621	150551880	shCONT_rep1
chr1	150550515	150553532	chr1	150589501	150591258	chr1	150551621	150551880	shCONT_rep1
chr1	150550515	150553532	chr1	150607848	150611361	chr1	150551621	150551880	shCONT_rep1
chr1	150550515	150553532	chr1	150661843	150667438	chr1	150551621	150551880	shCONT_rep1
chr1	150550515	150553532	chr1	150683296	150686134	chr1	150551621	150551880	shCONT_rep1
chr1	150550515	150553532	chr1	150714518	150715651	chr1	150551621	150551880	shCONT_rep1
chr1	150550515	150553532	chr1	150745466	150747334	chr1	150551621	150551880	shCONT_rep1
chr1	150550515	150553532	chr1	150825777	150829136	chr1	150551621	150551880	shCONT_rep1
chr1	150550515	150553532	chr1	150944303	150947092	chr1	150551621	150551880	shCONT_rep1
chr1	150550515	150553532	chr1	150944303	150947092	chr1	150946596	150947344	shCONT_rep1
chr1	150550515	150553532	chr1	151495595	151496728	chr1	150551621	150551880	shCONT_rep1
chr1	150550515	150553532	chr1	202772906	202777774	chr1	150551621	150551880	shCONT_rep1
chr1	150550515	150553532	chr1	202772906	202777774	chr1	202776396	202777017	shCONT_rep1
chr1	150576038	150579928	chr1	150599231	150602724	chr1	150601781	150602195	shCONT_rep1
chr1	150582620	150586627	chr1	150599231	150602724	chr1	150601781	150602195	shCONT_rep1
chr1	150582620	150586627	chr1	150847559	150849916	chr1	150848814	150849415	shCONT_rep1
chr1	150589501	150591258	chr1	150599231	150602724	chr1	150601781	150602195	shCONT_rep1
chr1	150592332	150594820	chr1	150599231	150602724	chr1	150601781	150602195	shCONT_rep1
chr1	150597825	150598958	chr1	150599231	150602724	chr1	150601781	150602195	shCONT_rep1
chr1	150599231	150602724	chr1	150607848	150611361	chr1	150601781	150602195	shCONT_rep1
chr1	150599231	150602724	chr1	150612581	150613927	chr1	150601781	150602195	shCONT_rep1
chr1	150599231	150602724	chr1	150621169	150623259	chr1	150601781	150602195	shCONT_rep1
chr1	150599231	150602724	chr1	150630555	150632671	chr1	150601781	150602195	shCONT_rep1
chr1	150599231	150602724	chr1	150683296	150686134	chr1	150601781	150602195	shCONT_rep1
chr1	150599231	150602724	chr1	150788184	150790503	chr1	150601781	150602195	shCONT_rep1
chr1	150599231	150602724	chr1	150825777	150829136	chr1	150601781	150602195	shCONT_rep1
chr1	150599231	150602724	chr1	150932515	150934289	chr1	150601781	150602195	shCONT_rep1
chr1	150599231	150602724	chr1	150937587	150941868	chr1	150601781	150602195	shCONT_rep1
chr1	150599231	150602724	chr1	150976979	150982673	chr1	150601781	150602195	shCONT_rep1
chr1	150615038	150617473	chr1	150944303	150947092	chr1	150946596	150947344	shCONT_rep1
chr1	150721032	150722205	chr1	150847559	150849916	chr1	150848814	150849415	shCONT_rep1
chr1	150784648	150786085	chr1	150944303	150947092	chr1	150946596	150947344	shCONT_rep1
chr1	150811868	150814966	chr1	150847559	150849916	chr1	150848814	150849415	shCONT_rep1
chr1	150811868	150814966	chr1	150944303	150947092	chr1	150946596	150947344	shCONT_rep1
chr1	150815833	150818562	chr1	150847559	150849916	chr1	150848814	150849415	shCONT_rep1
chr1	150815833	150818562	chr1	150944303	150947092	chr1	150946596	150947344	shCONT_rep1
chr1	150825777	150829136	chr1	150847559	150849916	chr1	150848814	150849415	shCONT_rep1
chr1	150834329	150836636	chr1	150847559	150849916	chr1	150848814	150849415	shCONT_rep1
chr1	150836965	150838175	chr1	150847559	150849916	chr1	150848814	150849415	shCONT_rep1
chr1	150841120	150842253	chr1	150847559	150849916	chr1	150848814	150849415	shCONT_rep1
chr1	150847559	150849916	chr1	150852472	150854232	chr1	150848814	150849415	shCONT_rep1
chr1	150847559	150849916	chr1	150858141	150859274	chr1	150848814	150849415	shCONT_rep1
chr1	150847559	150849916	chr1	150875088	150877114	chr1	150848814	150849415	shCONT_rep1
chr1	150847559	150849916	chr1	150892728	150894967	chr1	150848814	150849415	shCONT_rep1
chr1	150847559	150849916	chr1	150910777	150912791	chr1	150848814	150849415	shCONT_rep1
chr1	150847559	150849916	chr1	150951281	150952612	chr1	150848814	150849415	shCONT_rep1
chr1	150847559	150849916	chr1	150962195	150965204	chr1	150848814	150849415	shCONT_rep1
chr1	150847559	150849916	chr1	150973020	150974684	chr1	150848814	150849415	shCONT_rep1
chr1	150847559	150849916	chr1	151234078	151236159	chr1	150848814	150849415	shCONT_rep1
chr1	150917536	150918802	chr1	150944303	150947092	chr1	150946596	150947344	shCONT_rep1
chr1	150921796	150924205	chr1	150944303	150947092	chr1	150946596	150947344	shCONT_rep1
chr1	150932515	150934289	chr1	150944303	150947092	chr1	150946596	150947344	shCONT_rep1
chr1	150936043	150937271	chr1	150944303	150947092	chr1	150946596	150947344	shCONT_rep1
chr1	150937587	150941868	chr1	150944303	150947092	chr1	150946596	150947344	shCONT_rep1
chr1	150944303	150947092	chr1	150948825	150950698	chr1	150946596	150947344	shCONT_rep1
chr1	150944303	150947092	chr1	150951281	150952612	chr1	150946596	150947344	shCONT_rep1
chr1	150944303	150947092	chr1	150953960	150955225	chr1	150946596	150947344	shCONT_rep1
chr1	150944303	150947092	chr1	150956573	150958679	chr1	150946596	150947344	shCONT_rep1
chr1	150944303	150947092	chr1	150959850	150961135	chr1	150946596	150947344	shCONT_rep1
chr1	150944303	150947092	chr1	150962195	150965204	chr1	150946596	150947344	shCONT_rep1
chr1	150944303	150947092	chr1	150965907	150968405	chr1	150946596	150947344	shCONT_rep1
chr1	150944303	150947092	chr1	150976979	150982673	chr1	150946596	150947344	shCONT_rep1
chr1	150944303	150947092	chr1	151030415	151032728	chr1	150946596	150947344	shCONT_rep1
chr1	150944303	150947092	chr1	151082632	151084923	chr1	150946596	150947344	shCONT_rep1
chr1	150944303	150947092	chr1	151258423	151261868	chr1	150946596	150947344	shCONT_rep1
chr1	1509760	1511241	chr1	1513268	1514459	chr1	1509705	1510329	shCONT_rep1
chr1	1509760	1511241	chr1	1524914	1530303	chr1	1509705	1510329	shCONT_rep1
chr1	1509760	1511241	chr1	1556892	1559403	chr1	1509705	1510329	shCONT_rep1
chr1	150985048	150987385	chr1	151018358	151021081	chr1	151020399	151020700	shCONT_rep1
chr1	150991825	150992958	chr1	151018358	151021081	chr1	151020399	151020700	shCONT_rep1
chr1	150999141	151001829	chr1	151018358	151021081	chr1	151020399	151020700	shCONT_rep1
chr1	151006009	151008159	chr1	151018358	151021081	chr1	151020399	151020700	shCONT_rep1
chr1	151009043	151010359	chr1	151018358	151021081	chr1	151020399	151020700	shCONT_rep1
chr1	151012047	151013187	chr1	151018358	151021081	chr1	151020399	151020700	shCONT_rep1
chr1	151015190	151016556	chr1	151018358	151021081	chr1	151020399	151020700	shCONT_rep1
chr1	151018358	151021081	chr1	151022894	151024117	chr1	151020399	151020700	shCONT_rep1
chr1	151018358	151021081	chr1	151025791	151028147	chr1	151020399	151020700	shCONT_rep1
chr1	151018358	151021081	chr1	151030415	151032728	chr1	151020399	151020700	shCONT_rep1
chr1	151018358	151021081	chr1	151042646	151043779	chr1	151020399	151020700	shCONT_rep1
chr1	151018358	151021081	chr1	151094456	151098200	chr1	151020399	151020700	shCONT_rep1
chr1	151018358	151021081	chr1	151305826	151309682	chr1	151020399	151020700	shCONT_rep1
chr1	151018358	151021081	chr1	151562656	151564625	chr1	151020399	151020700	shCONT_rep1
chr1	151088549	151091208	chr1	151252722	151256840	chr1	151255044	151255365	shCONT_rep1
chr1	151130690	151133546	chr1	151252722	151256840	chr1	151255044	151255365	shCONT_rep1
chr1	151161121	151163316	chr1	151170664	151173069	chr1	151171291	151171511	shCONT_rep1
chr1	151161121	151163316	chr1	151252722	151256840	chr1	151255044	151255365	shCONT_rep1
chr1	151164661	151165909	chr1	151170664	151173069	chr1	151171291	151171511	shCONT_rep1
chr1	151170664	151173069	chr1	151173732	151176233	chr1	151171291	151171511	shCONT_rep1
chr1	151170664	151173069	chr1	151177405	151178580	chr1	151171291	151171511	shCONT_rep1
chr1	151170664	151173069	chr1	151182183	151183553	chr1	151171291	151171511	shCONT_rep1
chr1	151170664	151173069	chr1	151184324	151186295	chr1	151171291	151171511	shCONT_rep1
chr1	151170664	151173069	chr1	151191566	151194501	chr1	151171291	151171511	shCONT_rep1
chr1	151170664	151173069	chr1	151213823	151216740	chr1	151171291	151171511	shCONT_rep1
chr1	151170664	151173069	chr1	151229770	151230903	chr1	151171291	151171511	shCONT_rep1
chr1	151170664	151173069	chr1	151234078	151236159	chr1	151171291	151171511	shCONT_rep1
chr1	151170664	151173069	chr1	151298021	151301663	chr1	151171291	151171511	shCONT_rep1
chr1	151170664	151173069	chr1	151341861	151345745	chr1	151171291	151171511	shCONT_rep1
chr1	151170664	151173069	chr1	151513921	151517422	chr1	151171291	151171511	shCONT_rep1
chr1	151173732	151176233	chr1	151252722	151256840	chr1	151255044	151255365	shCONT_rep1
chr1	151191566	151194501	chr1	151252722	151256840	chr1	151255044	151255365	shCONT_rep1
chr1	151213823	151216740	chr1	151252722	151256840	chr1	151255044	151255365	shCONT_rep1
chr1	151223661	151227855	chr1	151252722	151256840	chr1	151255044	151255365	shCONT_rep1
chr1	151234078	151236159	chr1	151252722	151256840	chr1	151255044	151255365	shCONT_rep1
chr1	151241456	151243243	chr1	151252722	151256840	chr1	151255044	151255365	shCONT_rep1
chr1	151243509	151246305	chr1	151252722	151256840	chr1	151255044	151255365	shCONT_rep1
chr1	151252722	151256840	chr1	151258423	151261868	chr1	151255044	151255365	shCONT_rep1
chr1	151252722	151256840	chr1	151262360	151263493	chr1	151255044	151255365	shCONT_rep1
chr1	151252722	151256840	chr1	151264317	151265737	chr1	151255044	151255365	shCONT_rep1
chr1	151252722	151256840	chr1	151267050	151268759	chr1	151255044	151255365	shCONT_rep1
chr1	151252722	151256840	chr1	151269601	151271526	chr1	151255044	151255365	shCONT_rep1
chr1	151252722	151256840	chr1	151272627	151274967	chr1	151255044	151255365	shCONT_rep1
chr1	151252722	151256840	chr1	151277530	151281140	chr1	151255044	151255365	shCONT_rep1
chr1	151252722	151256840	chr1	151281745	151283500	chr1	151255044	151255365	shCONT_rep1
chr1	151252722	151256840	chr1	151290025	151293056	chr1	151255044	151255365	shCONT_rep1
chr1	151252722	151256840	chr1	151298021	151301663	chr1	151255044	151255365	shCONT_rep1
chr1	151252722	151256840	chr1	151305826	151309682	chr1	151255044	151255365	shCONT_rep1
chr1	151252722	151256840	chr1	151313546	151320001	chr1	151255044	151255365	shCONT_rep1
chr1	151252722	151256840	chr1	151341861	151345745	chr1	151255044	151255365	shCONT_rep1
chr1	151252722	151256840	chr1	151379418	151380704	chr1	151255044	151255365	shCONT_rep1
chr1	151252722	151256840	chr1	151511438	151513382	chr1	151255044	151255365	shCONT_rep1
chr1	151252722	151256840	chr1	151662753	151666503	chr1	151255044	151255365	shCONT_rep1
chr1	151298021	151301663	chr1	151734430	151736978	chr1	151735689	151736234	shCONT_rep1
chr1	151370315	151372880	chr1	151734430	151736978	chr1	151735689	151736234	shCONT_rep1
chr1	151414079	151415723	chr1	151482864	151484453	chr1	151483434	151483942	shCONT_rep1
chr1	151430416	151434481	chr1	151482864	151484453	chr1	151483434	151483942	shCONT_rep1
chr1	151430416	151434481	chr1	151583382	151585768	chr1	151584402	151585003	shCONT_rep1
chr1	151475954	151477217	chr1	151482864	151484453	chr1	151483434	151483942	shCONT_rep1
chr1	151482864	151484453	chr1	151485065	151487126	chr1	151483434	151483942	shCONT_rep1
chr1	151513921	151517422	chr1	151734430	151736978	chr1	151735689	151736234	shCONT_rep1
chr1	151520378	151523876	chr1	151583382	151585768	chr1	151584402	151585003	shCONT_rep1
chr1	151520378	151523876	chr1	151734430	151736978	chr1	151735689	151736234	shCONT_rep1
chr1	151546721	151549416	chr1	151583382	151585768	chr1	151584402	151585003	shCONT_rep1
chr1	151551038	151554047	chr1	151583382	151585768	chr1	151584402	151585003	shCONT_rep1
chr1	151556787	151559226	chr1	151583382	151585768	chr1	151584402	151585003	shCONT_rep1
chr1	151576462	151577862	chr1	151583382	151585768	chr1	151584402	151585003	shCONT_rep1
chr1	151579403	151580536	chr1	151583382	151585768	chr1	151584402	151585003	shCONT_rep1
chr1	151583382	151585768	chr1	151593335	151594732	chr1	151584402	151585003	shCONT_rep1
chr1	151583382	151585768	chr1	151597748	151600851	chr1	151584402	151585003	shCONT_rep1
chr1	151583382	151585768	chr1	151603817	151605111	chr1	151584402	151585003	shCONT_rep1
chr1	151583382	151585768	chr1	151606411	151609784	chr1	151584402	151585003	shCONT_rep1
chr1	151583382	151585768	chr1	151625233	151627815	chr1	151584402	151585003	shCONT_rep1
chr1	151583382	151585768	chr1	151795867	151799067	chr1	151584402	151585003	shCONT_rep1
chr1	151718296	151722877	chr1	151734430	151736978	chr1	151735689	151736234	shCONT_rep1
chr1	151724711	151726930	chr1	151734430	151736978	chr1	151735689	151736234	shCONT_rep1
chr1	151734430	151736978	chr1	151740184	151741317	chr1	151735689	151736234	shCONT_rep1
chr1	151734430	151736978	chr1	151742315	151744200	chr1	151735689	151736234	shCONT_rep1
chr1	151734430	151736978	chr1	151744660	151745926	chr1	151735689	151736234	shCONT_rep1
chr1	151734430	151736978	chr1	151750039	151752844	chr1	151735689	151736234	shCONT_rep1
chr1	151734430	151736978	chr1	151755472	151756707	chr1	151735689	151736234	shCONT_rep1
chr1	151734430	151736978	chr1	151773106	151779500	chr1	151735689	151736234	shCONT_rep1
chr1	151734430	151736978	chr1	151801091	151804863	chr1	151735689	151736234	shCONT_rep1
chr1	151734430	151736978	chr1	151807070	151810705	chr1	151735689	151736234	shCONT_rep1
chr1	151734430	151736978	chr1	151824443	151825923	chr1	151735689	151736234	shCONT_rep1
chr1	151734430	151736978	chr1	151830168	151834053	chr1	151735689	151736234	shCONT_rep1
chr1	151878331	151882886	chr1	154191892	154195612	chr1	154192760	154193419	shCONT_rep1
chr1	152880022	152882504	chr1	153698755	153703091	chr1	153700342	153700607	shCONT_rep1
chr1	153376981	153378231	chr1	153957907	153960932	chr1	153958653	153958866	shCONT_rep1
chr1	153448667	153452478	chr1	153604542	153608800	chr1	153606285	153606859	shCONT_rep1
chr1	153463937	153468984	chr1	153604542	153608800	chr1	153606285	153606859	shCONT_rep1
chr1	153475298	153477379	chr1	153630402	153632260	chr1	153631070	153631291	shCONT_rep1
chr1	153481009	153484330	chr1	153604542	153608800	chr1	153606285	153606859	shCONT_rep1
chr1	153497250	153501366	chr1	153604542	153608800	chr1	153606285	153606859	shCONT_rep1
chr1	153505542	153508953	chr1	153604542	153608800	chr1	153606285	153606859	shCONT_rep1
chr1	153505542	153508953	chr1	153698755	153703091	chr1	153700342	153700607	shCONT_rep1
chr1	153512251	153513423	chr1	153630402	153632260	chr1	153631070	153631291	shCONT_rep1
chr1	153519066	153522882	chr1	153604542	153608800	chr1	153606285	153606859	shCONT_rep1
chr1	153525929	153528789	chr1	153604542	153608800	chr1	153606285	153606859	shCONT_rep1
chr1	153531484	153534377	chr1	153604542	153608800	chr1	153606285	153606859	shCONT_rep1
chr1	153536535	153541851	chr1	153604542	153608800	chr1	153606285	153606859	shCONT_rep1
chr1	153536535	153541851	chr1	153698755	153703091	chr1	153700342	153700607	shCONT_rep1
chr1	153536535	153541851	chr1	153754069	153757348	chr1	153756198	153756413	shCONT_rep1
chr1	153544196	153546604	chr1	153604542	153608800	chr1	153606285	153606859	shCONT_rep1
chr1	153550377	153551688	chr1	153604542	153608800	chr1	153606285	153606859	shCONT_rep1
chr1	153555951	153558270	chr1	153630402	153632260	chr1	153631070	153631291	shCONT_rep1
chr1	153558702	153561904	chr1	153604542	153608800	chr1	153606285	153606859	shCONT_rep1
chr1	153558702	153561904	chr1	153957907	153960932	chr1	153958653	153958866	shCONT_rep1
chr1	153566637	153573953	chr1	153604542	153608800	chr1	153606285	153606859	shCONT_rep1
chr1	153566637	153573953	chr1	153698755	153703091	chr1	153700342	153700607	shCONT_rep1
chr1	153566637	153573953	chr1	153927130	153931506	chr1	153930831	153931134	shCONT_rep1
chr1	153575999	153577282	chr1	153604542	153608800	chr1	153606285	153606859	shCONT_rep1
chr1	153578532	153582466	chr1	153604542	153608800	chr1	153606285	153606859	shCONT_rep1
chr1	153578532	153582466	chr1	153630402	153632260	chr1	153631070	153631291	shCONT_rep1
chr1	153584571	153591001	chr1	153604542	153608800	chr1	153606285	153606859	shCONT_rep1
chr1	153584571	153591001	chr1	153630402	153632260	chr1	153631070	153631291	shCONT_rep1
chr1	153584571	153591001	chr1	153754069	153757348	chr1	153756198	153756413	shCONT_rep1
chr1	153594479	153595855	chr1	153604542	153608800	chr1	153606285	153606859	shCONT_rep1
chr1	153596547	153597770	chr1	153604542	153608800	chr1	153606285	153606859	shCONT_rep1
chr1	153599683	153601443	chr1	153604542	153608800	chr1	153606285	153606859	shCONT_rep1
chr1	153601806	153603335	chr1	153604542	153608800	chr1	153606285	153606859	shCONT_rep1
chr1	153601806	153603335	chr1	153630402	153632260	chr1	153631070	153631291	shCONT_rep1
chr1	153604542	153608800	chr1	153612909	153615886	chr1	153606285	153606859	shCONT_rep1
chr1	153604542	153608800	chr1	153619472	153622871	chr1	153606285	153606859	shCONT_rep1
chr1	153604542	153608800	chr1	153626485	153629550	chr1	153606285	153606859	shCONT_rep1
chr1	153604542	153608800	chr1	153632767	153634662	chr1	153606285	153606859	shCONT_rep1
chr1	153604542	153608800	chr1	153635076	153636464	chr1	153606285	153606859	shCONT_rep1
chr1	153604542	153608800	chr1	153638028	153639334	chr1	153606285	153606859	shCONT_rep1
chr1	153604542	153608800	chr1	153641847	153644476	chr1	153606285	153606859	shCONT_rep1
chr1	153604542	153608800	chr1	153663431	153666957	chr1	153606285	153606859	shCONT_rep1
chr1	153604542	153608800	chr1	153746158	153747424	chr1	153606285	153606859	shCONT_rep1
chr1	153604542	153608800	chr1	153754069	153757348	chr1	153606285	153606859	shCONT_rep1
chr1	153604542	153608800	chr1	153754069	153757348	chr1	153756198	153756413	shCONT_rep1
chr1	153604542	153608800	chr1	154116666	154120753	chr1	153606285	153606859	shCONT_rep1
chr1	153612909	153615886	chr1	153630402	153632260	chr1	153631070	153631291	shCONT_rep1
chr1	153619472	153622871	chr1	153630402	153632260	chr1	153631070	153631291	shCONT_rep1
chr1	153619472	153622871	chr1	153957907	153960932	chr1	153958653	153958866	shCONT_rep1
chr1	153626485	153629550	chr1	153630402	153632260	chr1	153631070	153631291	shCONT_rep1
chr1	153626485	153629550	chr1	153957907	153960932	chr1	153958653	153958866	shCONT_rep1
chr1	153630402	153632260	chr1	153632767	153634662	chr1	153631070	153631291	shCONT_rep1
chr1	153630402	153632260	chr1	153635076	153636464	chr1	153631070	153631291	shCONT_rep1
chr1	153630402	153632260	chr1	153638028	153639334	chr1	153631070	153631291	shCONT_rep1
chr1	153630402	153632260	chr1	153641847	153644476	chr1	153631070	153631291	shCONT_rep1
chr1	153641847	153644476	chr1	153698755	153703091	chr1	153700342	153700607	shCONT_rep1
chr1	153641847	153644476	chr1	153754069	153757348	chr1	153756198	153756413	shCONT_rep1
chr1	153641847	153644476	chr1	153957907	153960932	chr1	153958653	153958866	shCONT_rep1
chr1	153648072	153651011	chr1	153698755	153703091	chr1	153700342	153700607	shCONT_rep1
chr1	153653132	153655085	chr1	153698755	153703091	chr1	153700342	153700607	shCONT_rep1
chr1	153657728	153662228	chr1	153698755	153703091	chr1	153700342	153700607	shCONT_rep1
chr1	153657728	153662228	chr1	153949130	153950485	chr1	153950061	153950301	shCONT_rep1
chr1	153669623	153671547	chr1	153698755	153703091	chr1	153700342	153700607	shCONT_rep1
chr1	153680318	153682415	chr1	153949130	153950485	chr1	153950061	153950301	shCONT_rep1
chr1	153685828	153689498	chr1	153698755	153703091	chr1	153700342	153700607	shCONT_rep1
chr1	153692749	153694795	chr1	153698755	153703091	chr1	153700342	153700607	shCONT_rep1
chr1	153696096	153698365	chr1	153698755	153703091	chr1	153700342	153700607	shCONT_rep1
chr1	153698755	153703091	chr1	153705421	153707858	chr1	153700342	153700607	shCONT_rep1
chr1	153698755	153703091	chr1	153711742	153713697	chr1	153700342	153700607	shCONT_rep1
chr1	153698755	153703091	chr1	153714755	153716823	chr1	153700342	153700607	shCONT_rep1
chr1	153698755	153703091	chr1	153719608	153722846	chr1	153700342	153700607	shCONT_rep1
chr1	153698755	153703091	chr1	153724401	153727099	chr1	153700342	153700607	shCONT_rep1
chr1	153698755	153703091	chr1	153740169	153743389	chr1	153700342	153700607	shCONT_rep1
chr1	153698755	153703091	chr1	153746158	153747424	chr1	153700342	153700607	shCONT_rep1
chr1	153698755	153703091	chr1	153904605	153908417	chr1	153700342	153700607	shCONT_rep1
chr1	153698755	153703091	chr1	153939728	153943360	chr1	153700342	153700607	shCONT_rep1
chr1	153698755	153703091	chr1	153939728	153943360	chr1	153939637	153939888	shCONT_rep1
chr1	153719608	153722846	chr1	153754069	153757348	chr1	153756198	153756413	shCONT_rep1
chr1	153740169	153743389	chr1	153754069	153757348	chr1	153756198	153756413	shCONT_rep1
chr1	153740169	153743389	chr1	153927130	153931506	chr1	153930831	153931134	shCONT_rep1
chr1	153746158	153747424	chr1	153754069	153757348	chr1	153756198	153756413	shCONT_rep1
chr1	153748330	153752788	chr1	153754069	153757348	chr1	153756198	153756413	shCONT_rep1
chr1	153748330	153752788	chr1	153927130	153931506	chr1	153930831	153931134	shCONT_rep1
chr1	153748330	153752788	chr1	153957907	153960932	chr1	153958653	153958866	shCONT_rep1
chr1	153754069	153757348	chr1	153761847	153763180	chr1	153756198	153756413	shCONT_rep1
chr1	153754069	153757348	chr1	153763670	153768994	chr1	153756198	153756413	shCONT_rep1
chr1	153754069	153757348	chr1	153772361	153775813	chr1	153756198	153756413	shCONT_rep1
chr1	153754069	153757348	chr1	153799435	153801901	chr1	153756198	153756413	shCONT_rep1
chr1	153754069	153757348	chr1	153911121	153912554	chr1	153756198	153756413	shCONT_rep1
chr1	153754069	153757348	chr1	153927130	153931506	chr1	153756198	153756413	shCONT_rep1
chr1	153754069	153757348	chr1	153927130	153931506	chr1	153930831	153931134	shCONT_rep1
chr1	153754069	153757348	chr1	153934685	153937535	chr1	153756198	153756413	shCONT_rep1
chr1	153754069	153757348	chr1	153944072	153945266	chr1	153756198	153756413	shCONT_rep1
chr1	153754069	153757348	chr1	153957907	153960932	chr1	153756198	153756413	shCONT_rep1
chr1	153754069	153757348	chr1	153957907	153960932	chr1	153958653	153958866	shCONT_rep1
chr1	153754069	153757348	chr1	154077345	154080970	chr1	153756198	153756413	shCONT_rep1
chr1	153754069	153757348	chr1	154298335	154302441	chr1	153756198	153756413	shCONT_rep1
chr1	153754069	153757348	chr1	154418056	154419563	chr1	153756198	153756413	shCONT_rep1
chr1	153754069	153757348	chr1	180091200	180095347	chr1	153756198	153756413	shCONT_rep1
chr1	153761847	153763180	chr1	153939728	153943360	chr1	153939637	153939888	shCONT_rep1
chr1	153763670	153768994	chr1	153927130	153931506	chr1	153930831	153931134	shCONT_rep1
chr1	153763670	153768994	chr1	153939728	153943360	chr1	153939637	153939888	shCONT_rep1
chr1	153763670	153768994	chr1	153949130	153950485	chr1	153950061	153950301	shCONT_rep1
chr1	153763670	153768994	chr1	153957907	153960932	chr1	153958653	153958866	shCONT_rep1
chr1	153763670	153768994	chr1	154191892	154195612	chr1	154192760	154193419	shCONT_rep1
chr1	153769903	153771049	chr1	153949130	153950485	chr1	153950061	153950301	shCONT_rep1
chr1	153772361	153775813	chr1	153927130	153931506	chr1	153930831	153931134	shCONT_rep1
chr1	153772361	153775813	chr1	153939728	153943360	chr1	153939637	153939888	shCONT_rep1
chr1	153772361	153775813	chr1	153949130	153950485	chr1	153950061	153950301	shCONT_rep1
chr1	153772361	153775813	chr1	153957907	153960932	chr1	153958653	153958866	shCONT_rep1
chr1	153777130	153778741	chr1	153927130	153931506	chr1	153930831	153931134	shCONT_rep1
chr1	153777130	153778741	chr1	153957907	153960932	chr1	153958653	153958866	shCONT_rep1
chr1	153789939	153792524	chr1	153927130	153931506	chr1	153930831	153931134	shCONT_rep1
chr1	153789939	153792524	chr1	153939728	153943360	chr1	153939637	153939888	shCONT_rep1
chr1	153789939	153792524	chr1	153957907	153960932	chr1	153958653	153958866	shCONT_rep1
chr1	153792874	153796234	chr1	153939728	153943360	chr1	153939637	153939888	shCONT_rep1
chr1	153792874	153796234	chr1	153957907	153960932	chr1	153958653	153958866	shCONT_rep1
chr1	153799435	153801901	chr1	153927130	153931506	chr1	153930831	153931134	shCONT_rep1
chr1	153799435	153801901	chr1	153939728	153943360	chr1	153939637	153939888	shCONT_rep1
chr1	153799435	153801901	chr1	153957907	153960932	chr1	153958653	153958866	shCONT_rep1
chr1	153804306	153807796	chr1	153957907	153960932	chr1	153958653	153958866	shCONT_rep1
chr1	153815365	153817535	chr1	153927130	153931506	chr1	153930831	153931134	shCONT_rep1
chr1	153818443	153820610	chr1	153927130	153931506	chr1	153930831	153931134	shCONT_rep1
chr1	153827912	153829275	chr1	153939728	153943360	chr1	153939637	153939888	shCONT_rep1
chr1	153864033	153865837	chr1	153927130	153931506	chr1	153930831	153931134	shCONT_rep1
chr1	153872519	153873953	chr1	153939728	153943360	chr1	153939637	153939888	shCONT_rep1
chr1	153875173	153876599	chr1	153957907	153960932	chr1	153958653	153958866	shCONT_rep1
chr1	153884313	153890240	chr1	153939728	153943360	chr1	153939637	153939888	shCONT_rep1
chr1	153895106	153896719	chr1	153957907	153960932	chr1	153958653	153958866	shCONT_rep1
chr1	153899692	153901403	chr1	153927130	153931506	chr1	153930831	153931134	shCONT_rep1
chr1	153902488	153904039	chr1	153927130	153931506	chr1	153930831	153931134	shCONT_rep1
chr1	153904605	153908417	chr1	153927130	153931506	chr1	153930831	153931134	shCONT_rep1
chr1	153911121	153912554	chr1	153927130	153931506	chr1	153930831	153931134	shCONT_rep1
chr1	153917062	153921684	chr1	153927130	153931506	chr1	153930831	153931134	shCONT_rep1
chr1	153917062	153921684	chr1	153939728	153943360	chr1	153939637	153939888	shCONT_rep1
chr1	153917062	153921684	chr1	153957907	153960932	chr1	153958653	153958866	shCONT_rep1
chr1	153925146	153926415	chr1	153927130	153931506	chr1	153930831	153931134	shCONT_rep1
chr1	153925146	153926415	chr1	153939728	153943360	chr1	153939637	153939888	shCONT_rep1
chr1	153927130	153931506	chr1	153934685	153937535	chr1	153930831	153931134	shCONT_rep1
chr1	153927130	153931506	chr1	153939728	153943360	chr1	153930831	153931134	shCONT_rep1
chr1	153927130	153931506	chr1	153939728	153943360	chr1	153939637	153939888	shCONT_rep1
chr1	153927130	153931506	chr1	153944072	153945266	chr1	153930831	153931134	shCONT_rep1
chr1	153927130	153931506	chr1	153946063	153947980	chr1	153930831	153931134	shCONT_rep1
chr1	153927130	153931506	chr1	153957907	153960932	chr1	153930831	153931134	shCONT_rep1
chr1	153927130	153931506	chr1	153957907	153960932	chr1	153958653	153958866	shCONT_rep1
chr1	153927130	153931506	chr1	154095392	154096568	chr1	153930831	153931134	shCONT_rep1
chr1	153927130	153931506	chr1	154150022	154156812	chr1	153930831	153931134	shCONT_rep1
chr1	153927130	153931506	chr1	154509343	154510686	chr1	153930831	153931134	shCONT_rep1
chr1	153927130	153931506	chr1	167904267	167907010	chr1	153930831	153931134	shCONT_rep1
chr1	153927130	153931506	chr1	167904267	167907010	chr1	167905221	167905755	shCONT_rep1
chr1	153934685	153937535	chr1	153939728	153943360	chr1	153939637	153939888	shCONT_rep1
chr1	153934685	153937535	chr1	153949130	153950485	chr1	153950061	153950301	shCONT_rep1
chr1	153934685	153937535	chr1	153957907	153960932	chr1	153958653	153958866	shCONT_rep1
chr1	153939728	153943360	chr1	153944072	153945266	chr1	153939637	153939888	shCONT_rep1
chr1	153939728	153943360	chr1	153946063	153947980	chr1	153939637	153939888	shCONT_rep1
chr1	153939728	153943360	chr1	153949130	153950485	chr1	153939637	153939888	shCONT_rep1
chr1	153939728	153943360	chr1	153949130	153950485	chr1	153950061	153950301	shCONT_rep1
chr1	153939728	153943360	chr1	153957907	153960932	chr1	153939637	153939888	shCONT_rep1
chr1	153939728	153943360	chr1	153957907	153960932	chr1	153958653	153958866	shCONT_rep1
chr1	153939728	153943360	chr1	154077345	154080970	chr1	153939637	153939888	shCONT_rep1
chr1	153939728	153943360	chr1	154206474	154208330	chr1	153939637	153939888	shCONT_rep1
chr1	153939728	153943360	chr1	201500109	201501853	chr1	153939637	153939888	shCONT_rep1
chr1	153944072	153945266	chr1	153949130	153950485	chr1	153950061	153950301	shCONT_rep1
chr1	153944072	153945266	chr1	153957907	153960932	chr1	153958653	153958866	shCONT_rep1
chr1	153946063	153947980	chr1	153949130	153950485	chr1	153950061	153950301	shCONT_rep1
chr1	153946063	153947980	chr1	153957907	153960932	chr1	153958653	153958866	shCONT_rep1
chr1	153949130	153950485	chr1	153952263	153953396	chr1	153950061	153950301	shCONT_rep1
chr1	153949130	153950485	chr1	153957907	153960932	chr1	153950061	153950301	shCONT_rep1
chr1	153949130	153950485	chr1	153957907	153960932	chr1	153958653	153958866	shCONT_rep1
chr1	153952263	153953396	chr1	153957907	153960932	chr1	153958653	153958866	shCONT_rep1
chr1	153955233	153956366	chr1	153957907	153960932	chr1	153958653	153958866	shCONT_rep1
chr1	153957907	153960932	chr1	153964948	153966245	chr1	153958653	153958866	shCONT_rep1
chr1	153957907	153960932	chr1	153983568	153987156	chr1	153958653	153958866	shCONT_rep1
chr1	153957907	153960932	chr1	153992898	153996082	chr1	153958653	153958866	shCONT_rep1
chr1	153957907	153960932	chr1	154116666	154120753	chr1	153958653	153958866	shCONT_rep1
chr1	153957907	153960932	chr1	154150022	154156812	chr1	153958653	153958866	shCONT_rep1
chr1	153957907	153960932	chr1	154160128	154161842	chr1	153958653	153958866	shCONT_rep1
chr1	153957907	153960932	chr1	156072496	156077966	chr1	153958653	153958866	shCONT_rep1
chr1	154077345	154080970	chr1	154191892	154195612	chr1	154192760	154193419	shCONT_rep1
chr1	154116666	154120753	chr1	154191892	154195612	chr1	154192760	154193419	shCONT_rep1
chr1	154150022	154156812	chr1	154191892	154195612	chr1	154192760	154193419	shCONT_rep1
chr1	154150022	154156812	chr1	154295673	154297833	chr1	154297711	154298232	shCONT_rep1
chr1	154179966	154181355	chr1	154191892	154195612	chr1	154192760	154193419	shCONT_rep1
chr1	154181863	154184133	chr1	154191892	154195612	chr1	154192760	154193419	shCONT_rep1
chr1	154184896	154186029	chr1	154191892	154195612	chr1	154192760	154193419	shCONT_rep1
chr1	154188820	154190102	chr1	154191892	154195612	chr1	154192760	154193419	shCONT_rep1
chr1	154191892	154195612	chr1	154208757	154211001	chr1	154192760	154193419	shCONT_rep1
chr1	154191892	154195612	chr1	154224794	154226080	chr1	154192760	154193419	shCONT_rep1
chr1	154191892	154195612	chr1	154234841	154237548	chr1	154192760	154193419	shCONT_rep1
chr1	154191892	154195612	chr1	154241526	154242874	chr1	154192760	154193419	shCONT_rep1
chr1	154191892	154195612	chr1	154246968	154251756	chr1	154192760	154193419	shCONT_rep1
chr1	154246968	154251756	chr1	154295673	154297833	chr1	154297711	154298232	shCONT_rep1
chr1	154295673	154297833	chr1	154298335	154302441	chr1	154297711	154298232	shCONT_rep1
chr1	154295673	154297833	chr1	154343227	154346982	chr1	154297711	154298232	shCONT_rep1
chr1	154295673	154297833	chr1	154375911	154381391	chr1	154297711	154298232	shCONT_rep1
chr1	154295673	154297833	chr1	154399164	154404017	chr1	154297711	154298232	shCONT_rep1
chr1	154399164	154404017	chr1	154530551	154533666	chr1	154530964	154531388	shCONT_rep1
chr1	154399164	154404017	chr1	154579289	154584848	chr1	154580429	154580813	shCONT_rep1
chr1	154430243	154434236	chr1	154530551	154533666	chr1	154530964	154531388	shCONT_rep1
chr1	154440198	154441674	chr1	154530551	154533666	chr1	154530964	154531388	shCONT_rep1
chr1	154451909	154454531	chr1	154530551	154533666	chr1	154530964	154531388	shCONT_rep1
chr1	154473690	154477766	chr1	154579289	154584848	chr1	154580429	154580813	shCONT_rep1
chr1	154496690	154500966	chr1	154530551	154533666	chr1	154530964	154531388	shCONT_rep1
chr1	154503859	154507221	chr1	154530551	154533666	chr1	154530964	154531388	shCONT_rep1
chr1	154511467	154512858	chr1	154530551	154533666	chr1	154530964	154531388	shCONT_rep1
chr1	154515734	154517061	chr1	154530551	154533666	chr1	154530964	154531388	shCONT_rep1
chr1	154519612	154521484	chr1	154530551	154533666	chr1	154530964	154531388	shCONT_rep1
chr1	154523040	154526762	chr1	154530551	154533666	chr1	154530964	154531388	shCONT_rep1
chr1	154523040	154526762	chr1	154579289	154584848	chr1	154580429	154580813	shCONT_rep1
chr1	154530551	154533666	chr1	154539557	154541214	chr1	154530964	154531388	shCONT_rep1
chr1	154530551	154533666	chr1	154541603	154543167	chr1	154530964	154531388	shCONT_rep1
chr1	154530551	154533666	chr1	154544134	154546128	chr1	154530964	154531388	shCONT_rep1
chr1	154530551	154533666	chr1	154547719	154551507	chr1	154530964	154531388	shCONT_rep1
chr1	154530551	154533666	chr1	154552092	154553377	chr1	154530964	154531388	shCONT_rep1
chr1	154530551	154533666	chr1	154562489	154563693	chr1	154530964	154531388	shCONT_rep1
chr1	154530551	154533666	chr1	154586132	154589097	chr1	154530964	154531388	shCONT_rep1
chr1	154530551	154533666	chr1	154590990	154592309	chr1	154530964	154531388	shCONT_rep1
chr1	154530551	154533666	chr1	154596968	154602538	chr1	154530964	154531388	shCONT_rep1
chr1	154530551	154533666	chr1	154622755	154624791	chr1	154530964	154531388	shCONT_rep1
chr1	154530551	154533666	chr1	154641593	154643026	chr1	154530964	154531388	shCONT_rep1
chr1	154530551	154533666	chr1	154667886	154670863	chr1	154530964	154531388	shCONT_rep1
chr1	154530551	154533666	chr1	154738954	154741638	chr1	154530964	154531388	shCONT_rep1
chr1	154530551	154533666	chr1	154790233	154793475	chr1	154530964	154531388	shCONT_rep1
chr1	154530551	154533666	chr1	154812767	154816672	chr1	154530964	154531388	shCONT_rep1
chr1	154530551	154533666	chr1	154832342	154837858	chr1	154530964	154531388	shCONT_rep1
chr1	154530551	154533666	chr1	154841394	154844760	chr1	154530964	154531388	shCONT_rep1
chr1	154530551	154533666	chr1	154848619	154851881	chr1	154530964	154531388	shCONT_rep1
chr1	154530551	154533666	chr1	154908842	154915446	chr1	154530964	154531388	shCONT_rep1
chr1	154530551	154533666	chr1	154915849	154918047	chr1	154530964	154531388	shCONT_rep1
chr1	154530551	154533666	chr1	154919553	154920719	chr1	154530964	154531388	shCONT_rep1
chr1	154530551	154533666	chr1	154927732	154932550	chr1	154530964	154531388	shCONT_rep1
chr1	154530551	154533666	chr1	154940672	154947772	chr1	154530964	154531388	shCONT_rep1
chr1	154530551	154533666	chr1	154965453	154967431	chr1	154530964	154531388	shCONT_rep1
chr1	154530551	154533666	chr1	154973113	154975203	chr1	154530964	154531388	shCONT_rep1
chr1	154530551	154533666	chr1	155022312	155025026	chr1	154530964	154531388	shCONT_rep1
chr1	154530551	154533666	chr1	155122928	155127733	chr1	154530964	154531388	shCONT_rep1
chr1	154544134	154546128	chr1	154933337	154938443	chr1	154933875	154934194	shCONT_rep1
chr1	154556909	154562219	chr1	154579289	154584848	chr1	154580429	154580813	shCONT_rep1
chr1	154556909	154562219	chr1	154933337	154938443	chr1	154933875	154934194	shCONT_rep1
chr1	154570128	154572594	chr1	154579289	154584848	chr1	154580429	154580813	shCONT_rep1
chr1	154574644	154578320	chr1	154579289	154584848	chr1	154580429	154580813	shCONT_rep1
chr1	154579289	154584848	chr1	154586132	154589097	chr1	154580429	154580813	shCONT_rep1
chr1	154579289	154584848	chr1	154590990	154592309	chr1	154580429	154580813	shCONT_rep1
chr1	154579289	154584848	chr1	154593944	154595754	chr1	154580429	154580813	shCONT_rep1
chr1	154579289	154584848	chr1	154596968	154602538	chr1	154580429	154580813	shCONT_rep1
chr1	154579289	154584848	chr1	154617196	154621061	chr1	154580429	154580813	shCONT_rep1
chr1	154579289	154584848	chr1	154632845	154635374	chr1	154580429	154580813	shCONT_rep1
chr1	154579289	154584848	chr1	154673631	154675075	chr1	154580429	154580813	shCONT_rep1
chr1	154579289	154584848	chr1	154719864	154721190	chr1	154580429	154580813	shCONT_rep1
chr1	154579289	154584848	chr1	154738954	154741638	chr1	154580429	154580813	shCONT_rep1
chr1	154579289	154584848	chr1	154756347	154757630	chr1	154580429	154580813	shCONT_rep1
chr1	154579289	154584848	chr1	154758983	154762067	chr1	154580429	154580813	shCONT_rep1
chr1	154579289	154584848	chr1	154848619	154851881	chr1	154580429	154580813	shCONT_rep1
chr1	154579289	154584848	chr1	154855114	154859824	chr1	154580429	154580813	shCONT_rep1
chr1	154579289	154584848	chr1	154875990	154877770	chr1	154580429	154580813	shCONT_rep1
chr1	154579289	154584848	chr1	154908842	154915446	chr1	154580429	154580813	shCONT_rep1
chr1	154579289	154584848	chr1	154922739	154925637	chr1	154580429	154580813	shCONT_rep1
chr1	154579289	154584848	chr1	211473802	211476583	chr1	154580429	154580813	shCONT_rep1
chr1	154596968	154602538	chr1	154933337	154938443	chr1	154933875	154934194	shCONT_rep1
chr1	154769003	154771420	chr1	154933337	154938443	chr1	154933875	154934194	shCONT_rep1
chr1	154882776	154885835	chr1	154933337	154938443	chr1	154933875	154934194	shCONT_rep1
chr1	154888915	154891813	chr1	154933337	154938443	chr1	154933875	154934194	shCONT_rep1
chr1	154899736	154901482	chr1	154933337	154938443	chr1	154933875	154934194	shCONT_rep1
chr1	154902609	154903759	chr1	154933337	154938443	chr1	154933875	154934194	shCONT_rep1
chr1	154908842	154915446	chr1	154933337	154938443	chr1	154933875	154934194	shCONT_rep1
chr1	154915849	154918047	chr1	154933337	154938443	chr1	154933875	154934194	shCONT_rep1
chr1	154919553	154920719	chr1	154933337	154938443	chr1	154933875	154934194	shCONT_rep1
chr1	154922739	154925637	chr1	154933337	154938443	chr1	154933875	154934194	shCONT_rep1
chr1	154927732	154932550	chr1	154933337	154938443	chr1	154933875	154934194	shCONT_rep1
chr1	154933337	154938443	chr1	154940672	154947772	chr1	154933875	154934194	shCONT_rep1
chr1	154933337	154938443	chr1	154949455	154951701	chr1	154933875	154934194	shCONT_rep1
chr1	154933337	154938443	chr1	154954465	154957096	chr1	154933875	154934194	shCONT_rep1
chr1	154933337	154938443	chr1	154959892	154962373	chr1	154933875	154934194	shCONT_rep1
chr1	154933337	154938443	chr1	154965453	154967431	chr1	154933875	154934194	shCONT_rep1
chr1	154933337	154938443	chr1	154968142	154970924	chr1	154933875	154934194	shCONT_rep1
chr1	154933337	154938443	chr1	154971183	154972421	chr1	154933875	154934194	shCONT_rep1
chr1	154933337	154938443	chr1	154973113	154975203	chr1	154933875	154934194	shCONT_rep1
chr1	154933337	154938443	chr1	154977511	154982152	chr1	154933875	154934194	shCONT_rep1
chr1	154933337	154938443	chr1	154983043	154985979	chr1	154933875	154934194	shCONT_rep1
chr1	154933337	154938443	chr1	154989206	154992984	chr1	154933875	154934194	shCONT_rep1
chr1	154933337	154938443	chr1	155000981	155004212	chr1	154933875	154934194	shCONT_rep1
chr1	154933337	154938443	chr1	155011404	155014634	chr1	154933875	154934194	shCONT_rep1
chr1	154933337	154938443	chr1	155015985	155018155	chr1	154933875	154934194	shCONT_rep1
chr1	154933337	154938443	chr1	155022312	155025026	chr1	154933875	154934194	shCONT_rep1
chr1	154933337	154938443	chr1	155032715	155035439	chr1	154933875	154934194	shCONT_rep1
chr1	154933337	154938443	chr1	155038605	155044510	chr1	154933875	154934194	shCONT_rep1
chr1	154933337	154938443	chr1	155047513	155050135	chr1	154933875	154934194	shCONT_rep1
chr1	154933337	154938443	chr1	155055309	155059155	chr1	154933875	154934194	shCONT_rep1
chr1	154933337	154938443	chr1	155063104	155067656	chr1	154933875	154934194	shCONT_rep1
chr1	154933337	154938443	chr1	155091248	155092441	chr1	154933875	154934194	shCONT_rep1
chr1	154933337	154938443	chr1	155162408	155167620	chr1	154933875	154934194	shCONT_rep1
chr1	154933337	154938443	chr1	155196340	155199866	chr1	154933875	154934194	shCONT_rep1
chr1	155022312	155025026	chr1	155176674	155179646	chr1	155178807	155179291	shCONT_rep1
chr1	155022312	155025026	chr1	155826456	155830896	chr1	155826884	155827196	shCONT_rep1
chr1	155022312	155025026	chr1	155826456	155830896	chr1	155829933	155830429	shCONT_rep1
chr1	155107993	155113656	chr1	155220072	155222457	chr1	155220387	155220700	shCONT_rep1
chr1	155137924	155141252	chr1	155176674	155179646	chr1	155178807	155179291	shCONT_rep1
chr1	155144348	155146531	chr1	155222948	155227877	chr1	155225175	155225426	shCONT_rep1
chr1	155148934	155153206	chr1	155176674	155179646	chr1	155178807	155179291	shCONT_rep1
chr1	155162408	155167620	chr1	155176674	155179646	chr1	155178807	155179291	shCONT_rep1
chr1	155162408	155167620	chr1	155222948	155227877	chr1	155225175	155225426	shCONT_rep1
chr1	155162408	155167620	chr1	155246030	155248806	chr1	155247210	155247446	shCONT_rep1
chr1	155171420	155173927	chr1	155176674	155179646	chr1	155178807	155179291	shCONT_rep1
chr1	155171420	155173927	chr1	155222948	155227877	chr1	155225175	155225426	shCONT_rep1
chr1	155174565	155175788	chr1	155176674	155179646	chr1	155178807	155179291	shCONT_rep1
chr1	155176674	155179646	chr1	155180322	155181566	chr1	155178807	155179291	shCONT_rep1
chr1	155176674	155179646	chr1	155185967	155188269	chr1	155178807	155179291	shCONT_rep1
chr1	155176674	155179646	chr1	155188811	155190260	chr1	155178807	155179291	shCONT_rep1
chr1	155176674	155179646	chr1	155190538	155194276	chr1	155178807	155179291	shCONT_rep1
chr1	155176674	155179646	chr1	155196340	155199866	chr1	155178807	155179291	shCONT_rep1
chr1	155176674	155179646	chr1	155207069	155208573	chr1	155178807	155179291	shCONT_rep1
chr1	155176674	155179646	chr1	155222948	155227877	chr1	155178807	155179291	shCONT_rep1
chr1	155176674	155179646	chr1	155222948	155227877	chr1	155225175	155225426	shCONT_rep1
chr1	155176674	155179646	chr1	155246030	155248806	chr1	155178807	155179291	shCONT_rep1
chr1	155176674	155179646	chr1	155246030	155248806	chr1	155247210	155247446	shCONT_rep1
chr1	155176674	155179646	chr1	155264517	155268172	chr1	155178807	155179291	shCONT_rep1
chr1	155176674	155179646	chr1	155277655	155279438	chr1	155178807	155179291	shCONT_rep1
chr1	155176674	155179646	chr1	155293061	155298505	chr1	155178807	155179291	shCONT_rep1
chr1	155176674	155179646	chr1	155301289	155304671	chr1	155178807	155179291	shCONT_rep1
chr1	155176674	155179646	chr1	155377666	155382252	chr1	155178807	155179291	shCONT_rep1
chr1	155176674	155179646	chr1	155473258	155475537	chr1	155178807	155179291	shCONT_rep1
chr1	155176674	155179646	chr1	155559979	155562425	chr1	155178807	155179291	shCONT_rep1
chr1	155176674	155179646	chr1	155564783	155568792	chr1	155178807	155179291	shCONT_rep1
chr1	155190538	155194276	chr1	155222948	155227877	chr1	155225175	155225426	shCONT_rep1
chr1	155196340	155199866	chr1	155220072	155222457	chr1	155220387	155220700	shCONT_rep1
chr1	155196340	155199866	chr1	155222948	155227877	chr1	155225175	155225426	shCONT_rep1
chr1	155196340	155199866	chr1	155246030	155248806	chr1	155247210	155247446	shCONT_rep1
chr1	155207069	155208573	chr1	155220072	155222457	chr1	155220387	155220700	shCONT_rep1
chr1	155213704	155216738	chr1	155220072	155222457	chr1	155220387	155220700	shCONT_rep1
chr1	155213704	155216738	chr1	155222948	155227877	chr1	155225175	155225426	shCONT_rep1
chr1	155213704	155216738	chr1	155246030	155248806	chr1	155247210	155247446	shCONT_rep1
chr1	155213704	155216738	chr1	155532315	155538113	chr1	155532792	155533022	shCONT_rep1
chr1	155213704	155216738	chr1	155532315	155538113	chr1	155531922	155532468	shCONT_rep1
chr1	155220072	155222457	chr1	155222948	155227877	chr1	155220387	155220700	shCONT_rep1
chr1	155220072	155222457	chr1	155222948	155227877	chr1	155225175	155225426	shCONT_rep1
chr1	155220072	155222457	chr1	155230575	155233016	chr1	155220387	155220700	shCONT_rep1
chr1	155220072	155222457	chr1	155238615	155239748	chr1	155220387	155220700	shCONT_rep1
chr1	155220072	155222457	chr1	155241650	155245010	chr1	155220387	155220700	shCONT_rep1
chr1	155220072	155222457	chr1	155241650	155245010	chr1	155242775	155243265	shCONT_rep1
chr1	155220072	155222457	chr1	155246030	155248806	chr1	155220387	155220700	shCONT_rep1
chr1	155220072	155222457	chr1	155246030	155248806	chr1	155247210	155247446	shCONT_rep1
chr1	155220072	155222457	chr1	155270835	155276746	chr1	155220387	155220700	shCONT_rep1
chr1	155220072	155222457	chr1	155284422	155285555	chr1	155220387	155220700	shCONT_rep1
chr1	155220072	155222457	chr1	155285952	155287349	chr1	155220387	155220700	shCONT_rep1
chr1	155220072	155222457	chr1	155287634	155288944	chr1	155220387	155220700	shCONT_rep1
chr1	155220072	155222457	chr1	155293061	155298505	chr1	155220387	155220700	shCONT_rep1
chr1	155220072	155222457	chr1	155306236	155308881	chr1	155220387	155220700	shCONT_rep1
chr1	155220072	155222457	chr1	155440697	155443101	chr1	155220387	155220700	shCONT_rep1
chr1	155220072	155222457	chr1	155559979	155562425	chr1	155220387	155220700	shCONT_rep1
chr1	155220072	155222457	chr1	155608609	155610291	chr1	155220387	155220700	shCONT_rep1
chr1	155220072	155222457	chr1	155611187	155614053	chr1	155220387	155220700	shCONT_rep1
chr1	155220072	155222457	chr1	155618490	155623763	chr1	155220387	155220700	shCONT_rep1
chr1	155220072	155222457	chr1	200638118	200640084	chr1	155220387	155220700	shCONT_rep1
chr1	155220072	155222457	chr1	200638118	200640084	chr1	200638449	200638854	shCONT_rep1
chr1	155222948	155227877	chr1	155230575	155233016	chr1	155225175	155225426	shCONT_rep1
chr1	155222948	155227877	chr1	155236835	155238133	chr1	155225175	155225426	shCONT_rep1
chr1	155222948	155227877	chr1	155238615	155239748	chr1	155225175	155225426	shCONT_rep1
chr1	155222948	155227877	chr1	155241650	155245010	chr1	155225175	155225426	shCONT_rep1
chr1	155222948	155227877	chr1	155241650	155245010	chr1	155242775	155243265	shCONT_rep1
chr1	155222948	155227877	chr1	155246030	155248806	chr1	155225175	155225426	shCONT_rep1
chr1	155222948	155227877	chr1	155246030	155248806	chr1	155247210	155247446	shCONT_rep1
chr1	155222948	155227877	chr1	155253512	155256190	chr1	155225175	155225426	shCONT_rep1
chr1	155222948	155227877	chr1	155269115	155270504	chr1	155225175	155225426	shCONT_rep1
chr1	155222948	155227877	chr1	155270835	155276746	chr1	155225175	155225426	shCONT_rep1
chr1	155222948	155227877	chr1	155281634	155283931	chr1	155225175	155225426	shCONT_rep1
chr1	155222948	155227877	chr1	155285952	155287349	chr1	155225175	155225426	shCONT_rep1
chr1	155222948	155227877	chr1	155287634	155288944	chr1	155225175	155225426	shCONT_rep1
chr1	155222948	155227877	chr1	155291366	155292499	chr1	155225175	155225426	shCONT_rep1
chr1	155222948	155227877	chr1	155293061	155298505	chr1	155225175	155225426	shCONT_rep1
chr1	155222948	155227877	chr1	155317007	155318575	chr1	155225175	155225426	shCONT_rep1
chr1	155222948	155227877	chr1	155339365	155340976	chr1	155225175	155225426	shCONT_rep1
chr1	155222948	155227877	chr1	155532315	155538113	chr1	155225175	155225426	shCONT_rep1
chr1	155222948	155227877	chr1	155532315	155538113	chr1	155532792	155533022	shCONT_rep1
chr1	155222948	155227877	chr1	155532315	155538113	chr1	155531922	155532468	shCONT_rep1
chr1	155222948	155227877	chr1	155559979	155562425	chr1	155225175	155225426	shCONT_rep1
chr1	155222948	155227877	chr1	155575082	155578288	chr1	155225175	155225426	shCONT_rep1
chr1	155222948	155227877	chr1	155586304	155587640	chr1	155225175	155225426	shCONT_rep1
chr1	155222948	155227877	chr1	155611187	155614053	chr1	155225175	155225426	shCONT_rep1
chr1	155222948	155227877	chr1	155618490	155623763	chr1	155225175	155225426	shCONT_rep1
chr1	155222948	155227877	chr1	155710178	155715965	chr1	155225175	155225426	shCONT_rep1
chr1	155222948	155227877	chr1	155710178	155715965	chr1	155715493	155715743	shCONT_rep1
chr1	155222948	155227877	chr1	155799958	155801873	chr1	155225175	155225426	shCONT_rep1
chr1	155230575	155233016	chr1	155241650	155245010	chr1	155242775	155243265	shCONT_rep1
chr1	155230575	155233016	chr1	155246030	155248806	chr1	155247210	155247446	shCONT_rep1
chr1	155236835	155238133	chr1	155241650	155245010	chr1	155242775	155243265	shCONT_rep1
chr1	155236835	155238133	chr1	155246030	155248806	chr1	155247210	155247446	shCONT_rep1
chr1	155238615	155239748	chr1	155241650	155245010	chr1	155242775	155243265	shCONT_rep1
chr1	155241650	155245010	chr1	155246030	155248806	chr1	155242775	155243265	shCONT_rep1
chr1	155241650	155245010	chr1	155246030	155248806	chr1	155247210	155247446	shCONT_rep1
chr1	155241650	155245010	chr1	155253512	155256190	chr1	155242775	155243265	shCONT_rep1
chr1	155241650	155245010	chr1	155258742	155260748	chr1	155242775	155243265	shCONT_rep1
chr1	155241650	155245010	chr1	155264517	155268172	chr1	155242775	155243265	shCONT_rep1
chr1	155241650	155245010	chr1	155270835	155276746	chr1	155242775	155243265	shCONT_rep1
chr1	155241650	155245010	chr1	155280047	155281280	chr1	155242775	155243265	shCONT_rep1
chr1	155241650	155245010	chr1	155281634	155283931	chr1	155242775	155243265	shCONT_rep1
chr1	155241650	155245010	chr1	155287634	155288944	chr1	155242775	155243265	shCONT_rep1
chr1	155241650	155245010	chr1	155293061	155298505	chr1	155242775	155243265	shCONT_rep1
chr1	155241650	155245010	chr1	155301289	155304671	chr1	155242775	155243265	shCONT_rep1
chr1	155241650	155245010	chr1	155559979	155562425	chr1	155242775	155243265	shCONT_rep1
chr1	155241650	155245010	chr1	155633059	155635428	chr1	155242775	155243265	shCONT_rep1
chr1	155246030	155248806	chr1	155250698	155251832	chr1	155247210	155247446	shCONT_rep1
chr1	155246030	155248806	chr1	155253512	155256190	chr1	155247210	155247446	shCONT_rep1
chr1	155246030	155248806	chr1	155264517	155268172	chr1	155247210	155247446	shCONT_rep1
chr1	155246030	155248806	chr1	155269115	155270504	chr1	155247210	155247446	shCONT_rep1
chr1	155246030	155248806	chr1	155270835	155276746	chr1	155247210	155247446	shCONT_rep1
chr1	155246030	155248806	chr1	155277655	155279438	chr1	155247210	155247446	shCONT_rep1
chr1	155246030	155248806	chr1	155281634	155283931	chr1	155247210	155247446	shCONT_rep1
chr1	155246030	155248806	chr1	155284422	155285555	chr1	155247210	155247446	shCONT_rep1
chr1	155246030	155248806	chr1	155287634	155288944	chr1	155247210	155247446	shCONT_rep1
chr1	155246030	155248806	chr1	155291366	155292499	chr1	155247210	155247446	shCONT_rep1
chr1	155246030	155248806	chr1	155321067	155322541	chr1	155247210	155247446	shCONT_rep1
chr1	155246030	155248806	chr1	155532315	155538113	chr1	155247210	155247446	shCONT_rep1
chr1	155246030	155248806	chr1	155532315	155538113	chr1	155532792	155533022	shCONT_rep1
chr1	155246030	155248806	chr1	155532315	155538113	chr1	155531922	155532468	shCONT_rep1
chr1	155246030	155248806	chr1	155559979	155562425	chr1	155247210	155247446	shCONT_rep1
chr1	155246030	155248806	chr1	155919280	155925091	chr1	155247210	155247446	shCONT_rep1
chr1	155253512	155256190	chr1	155532315	155538113	chr1	155532792	155533022	shCONT_rep1
chr1	155253512	155256190	chr1	155532315	155538113	chr1	155531922	155532468	shCONT_rep1
chr1	155258742	155260748	chr1	155579243	155580383	chr1	155579915	155580210	shCONT_rep1
chr1	155270835	155276746	chr1	155532315	155538113	chr1	155532792	155533022	shCONT_rep1
chr1	155270835	155276746	chr1	155532315	155538113	chr1	155531922	155532468	shCONT_rep1
chr1	155293061	155298505	chr1	155532315	155538113	chr1	155532792	155533022	shCONT_rep1
chr1	155293061	155298505	chr1	155532315	155538113	chr1	155531922	155532468	shCONT_rep1
chr1	155301289	155304671	chr1	155579243	155580383	chr1	155579915	155580210	shCONT_rep1
chr1	155358291	155359469	chr1	155532315	155538113	chr1	155532792	155533022	shCONT_rep1
chr1	155358291	155359469	chr1	155532315	155538113	chr1	155531922	155532468	shCONT_rep1
chr1	155373511	155377102	chr1	155532315	155538113	chr1	155532792	155533022	shCONT_rep1
chr1	155373511	155377102	chr1	155532315	155538113	chr1	155531922	155532468	shCONT_rep1
chr1	155401135	155403886	chr1	155532315	155538113	chr1	155532792	155533022	shCONT_rep1
chr1	155401135	155403886	chr1	155532315	155538113	chr1	155531922	155532468	shCONT_rep1
chr1	155407083	155410410	chr1	155532315	155538113	chr1	155532792	155533022	shCONT_rep1
chr1	155407083	155410410	chr1	155532315	155538113	chr1	155531922	155532468	shCONT_rep1
chr1	155440697	155443101	chr1	155532315	155538113	chr1	155532792	155533022	shCONT_rep1
chr1	155440697	155443101	chr1	155532315	155538113	chr1	155531922	155532468	shCONT_rep1
chr1	155443727	155446341	chr1	155532315	155538113	chr1	155532792	155533022	shCONT_rep1
chr1	155443727	155446341	chr1	155532315	155538113	chr1	155531922	155532468	shCONT_rep1
chr1	1554530	1556356	chr1	27023451	27026111	chr1	27022695	27024244	shCONT_rep1
chr1	155484993	155487495	chr1	155532315	155538113	chr1	155532792	155533022	shCONT_rep1
chr1	155484993	155487495	chr1	155532315	155538113	chr1	155531922	155532468	shCONT_rep1
chr1	155504785	155507042	chr1	155532315	155538113	chr1	155532792	155533022	shCONT_rep1
chr1	155504785	155507042	chr1	155532315	155538113	chr1	155531922	155532468	shCONT_rep1
chr1	155508860	155510840	chr1	155532315	155538113	chr1	155532792	155533022	shCONT_rep1
chr1	155508860	155510840	chr1	155532315	155538113	chr1	155531922	155532468	shCONT_rep1
chr1	155514898	155517628	chr1	155532315	155538113	chr1	155532792	155533022	shCONT_rep1
chr1	155514898	155517628	chr1	155532315	155538113	chr1	155531922	155532468	shCONT_rep1
chr1	155522409	155523675	chr1	155532315	155538113	chr1	155532792	155533022	shCONT_rep1
chr1	155522409	155523675	chr1	155532315	155538113	chr1	155531922	155532468	shCONT_rep1
chr1	155524305	155525438	chr1	155532315	155538113	chr1	155532792	155533022	shCONT_rep1
chr1	155524305	155525438	chr1	155532315	155538113	chr1	155531922	155532468	shCONT_rep1
chr1	155526877	155529260	chr1	155532315	155538113	chr1	155532792	155533022	shCONT_rep1
chr1	155526877	155529260	chr1	155532315	155538113	chr1	155531922	155532468	shCONT_rep1
chr1	155532315	155538113	chr1	155540281	155541686	chr1	155532792	155533022	shCONT_rep1
chr1	155532315	155538113	chr1	155540281	155541686	chr1	155531922	155532468	shCONT_rep1
chr1	155532315	155538113	chr1	155542620	155545113	chr1	155532792	155533022	shCONT_rep1
chr1	155532315	155538113	chr1	155542620	155545113	chr1	155531922	155532468	shCONT_rep1
chr1	155532315	155538113	chr1	155548168	155550465	chr1	155532792	155533022	shCONT_rep1
chr1	155532315	155538113	chr1	155548168	155550465	chr1	155531922	155532468	shCONT_rep1
chr1	155532315	155538113	chr1	155564783	155568792	chr1	155532792	155533022	shCONT_rep1
chr1	155532315	155538113	chr1	155564783	155568792	chr1	155531922	155532468	shCONT_rep1
chr1	155532315	155538113	chr1	155618490	155623763	chr1	155532792	155533022	shCONT_rep1
chr1	155532315	155538113	chr1	155618490	155623763	chr1	155531922	155532468	shCONT_rep1
chr1	155575082	155578288	chr1	155710178	155715965	chr1	155715493	155715743	shCONT_rep1
chr1	155588515	155591072	chr1	155710178	155715965	chr1	155715493	155715743	shCONT_rep1
chr1	155618490	155623763	chr1	155710178	155715965	chr1	155715493	155715743	shCONT_rep1
chr1	155626562	155630519	chr1	155657505	155659557	chr1	155657869	155658455	shCONT_rep1
chr1	155640258	155641441	chr1	155657505	155659557	chr1	155657869	155658455	shCONT_rep1
chr1	155645662	155646930	chr1	155657505	155659557	chr1	155657869	155658455	shCONT_rep1
chr1	155655166	155656299	chr1	155657505	155659557	chr1	155657869	155658455	shCONT_rep1
chr1	155657505	155659557	chr1	155661046	155664789	chr1	155657869	155658455	shCONT_rep1
chr1	155657505	155659557	chr1	155665477	155666649	chr1	155657869	155658455	shCONT_rep1
chr1	155657505	155659557	chr1	155691549	155694674	chr1	155657869	155658455	shCONT_rep1
chr1	155657505	155659557	chr1	155779557	155781051	chr1	155657869	155658455	shCONT_rep1
chr1	155657505	155659557	chr1	156072496	156077966	chr1	155657869	155658455	shCONT_rep1
chr1	155678303	155679686	chr1	155710178	155715965	chr1	155715493	155715743	shCONT_rep1
chr1	155691549	155694674	chr1	155710178	155715965	chr1	155715493	155715743	shCONT_rep1
chr1	155697734	155699979	chr1	155710178	155715965	chr1	155715493	155715743	shCONT_rep1
chr1	155700947	155702080	chr1	155710178	155715965	chr1	155715493	155715743	shCONT_rep1
chr1	155703027	155704914	chr1	155710178	155715965	chr1	155715493	155715743	shCONT_rep1
chr1	155705913	155707046	chr1	155710178	155715965	chr1	155715493	155715743	shCONT_rep1
chr1	155710178	155715965	chr1	155717159	155719364	chr1	155715493	155715743	shCONT_rep1
chr1	155710178	155715965	chr1	155722573	155726834	chr1	155715493	155715743	shCONT_rep1
chr1	155710178	155715965	chr1	155734422	155736517	chr1	155715493	155715743	shCONT_rep1
chr1	155710178	155715965	chr1	155951787	155954223	chr1	155715493	155715743	shCONT_rep1
chr1	155717159	155719364	chr1	155826456	155830896	chr1	155826884	155827196	shCONT_rep1
chr1	155717159	155719364	chr1	155826456	155830896	chr1	155829933	155830429	shCONT_rep1
chr1	155722573	155726834	chr1	155879932	155882420	chr1	155880997	155881364	shCONT_rep1
chr1	155722573	155726834	chr1	155902897	155905624	chr1	155904035	155904533	shCONT_rep1
chr1	155729612	155730947	chr1	155826456	155830896	chr1	155826884	155827196	shCONT_rep1
chr1	155729612	155730947	chr1	155826456	155830896	chr1	155829933	155830429	shCONT_rep1
chr1	155776027	155777342	chr1	155826456	155830896	chr1	155826884	155827196	shCONT_rep1
chr1	155776027	155777342	chr1	155826456	155830896	chr1	155829933	155830429	shCONT_rep1
chr1	155782101	155783234	chr1	155826456	155830896	chr1	155826884	155827196	shCONT_rep1
chr1	155782101	155783234	chr1	155826456	155830896	chr1	155829933	155830429	shCONT_rep1
chr1	155796728	155798112	chr1	155826456	155830896	chr1	155826884	155827196	shCONT_rep1
chr1	155796728	155798112	chr1	155826456	155830896	chr1	155829933	155830429	shCONT_rep1
chr1	155799958	155801873	chr1	155826456	155830896	chr1	155826884	155827196	shCONT_rep1
chr1	155799958	155801873	chr1	155826456	155830896	chr1	155829933	155830429	shCONT_rep1
chr1	155805091	155807352	chr1	155826456	155830896	chr1	155826884	155827196	shCONT_rep1
chr1	155805091	155807352	chr1	155826456	155830896	chr1	155829933	155830429	shCONT_rep1
chr1	155805091	155807352	chr1	155879932	155882420	chr1	155880997	155881364	shCONT_rep1
chr1	155810881	155812062	chr1	155826456	155830896	chr1	155826884	155827196	shCONT_rep1
chr1	155810881	155812062	chr1	155826456	155830896	chr1	155829933	155830429	shCONT_rep1
chr1	155812736	155815357	chr1	155826456	155830896	chr1	155826884	155827196	shCONT_rep1
chr1	155812736	155815357	chr1	155826456	155830896	chr1	155829933	155830429	shCONT_rep1
chr1	155821626	155823779	chr1	155826456	155830896	chr1	155826884	155827196	shCONT_rep1
chr1	155821626	155823779	chr1	155826456	155830896	chr1	155829933	155830429	shCONT_rep1
chr1	155826456	155830896	chr1	155834331	155836265	chr1	155826884	155827196	shCONT_rep1
chr1	155826456	155830896	chr1	155834331	155836265	chr1	155829933	155830429	shCONT_rep1
chr1	155826456	155830896	chr1	155840356	155842891	chr1	155826884	155827196	shCONT_rep1
chr1	155826456	155830896	chr1	155840356	155842891	chr1	155829933	155830429	shCONT_rep1
chr1	155826456	155830896	chr1	155843768	155846249	chr1	155826884	155827196	shCONT_rep1
chr1	155826456	155830896	chr1	155843768	155846249	chr1	155829933	155830429	shCONT_rep1
chr1	155826456	155830896	chr1	155847153	155848898	chr1	155826884	155827196	shCONT_rep1
chr1	155826456	155830896	chr1	155847153	155848898	chr1	155829933	155830429	shCONT_rep1
chr1	155826456	155830896	chr1	155850295	155851596	chr1	155826884	155827196	shCONT_rep1
chr1	155826456	155830896	chr1	155850295	155851596	chr1	155829933	155830429	shCONT_rep1
chr1	155826456	155830896	chr1	155854721	155856313	chr1	155826884	155827196	shCONT_rep1
chr1	155826456	155830896	chr1	155854721	155856313	chr1	155829933	155830429	shCONT_rep1
chr1	155826456	155830896	chr1	155864585	155866822	chr1	155826884	155827196	shCONT_rep1
chr1	155826456	155830896	chr1	155864585	155866822	chr1	155829933	155830429	shCONT_rep1
chr1	155826456	155830896	chr1	155868605	155870879	chr1	155826884	155827196	shCONT_rep1
chr1	155826456	155830896	chr1	155868605	155870879	chr1	155829933	155830429	shCONT_rep1
chr1	155826456	155830896	chr1	155876266	155879387	chr1	155826884	155827196	shCONT_rep1
chr1	155826456	155830896	chr1	155876266	155879387	chr1	155829933	155830429	shCONT_rep1
chr1	155826456	155830896	chr1	155879932	155882420	chr1	155826884	155827196	shCONT_rep1
chr1	155826456	155830896	chr1	155879932	155882420	chr1	155829933	155830429	shCONT_rep1
chr1	155826456	155830896	chr1	155879932	155882420	chr1	155880997	155881364	shCONT_rep1
chr1	155826456	155830896	chr1	155896674	155898569	chr1	155826884	155827196	shCONT_rep1
chr1	155826456	155830896	chr1	155896674	155898569	chr1	155829933	155830429	shCONT_rep1
chr1	155826456	155830896	chr1	155902897	155905624	chr1	155826884	155827196	shCONT_rep1
chr1	155826456	155830896	chr1	155902897	155905624	chr1	155829933	155830429	shCONT_rep1
chr1	155826456	155830896	chr1	155902897	155905624	chr1	155904035	155904533	shCONT_rep1
chr1	155826456	155830896	chr1	155909323	155912491	chr1	155826884	155827196	shCONT_rep1
chr1	155826456	155830896	chr1	155909323	155912491	chr1	155829933	155830429	shCONT_rep1
chr1	155826456	155830896	chr1	155919280	155925091	chr1	155826884	155827196	shCONT_rep1
chr1	155826456	155830896	chr1	155919280	155925091	chr1	155829933	155830429	shCONT_rep1
chr1	155826456	155830896	chr1	155951787	155954223	chr1	155826884	155827196	shCONT_rep1
chr1	155826456	155830896	chr1	155951787	155954223	chr1	155829933	155830429	shCONT_rep1
chr1	155826456	155830896	chr1	155958282	155961143	chr1	155826884	155827196	shCONT_rep1
chr1	155826456	155830896	chr1	155958282	155961143	chr1	155829933	155830429	shCONT_rep1
chr1	155826456	155830896	chr1	156036378	156042041	chr1	155826884	155827196	shCONT_rep1
chr1	155826456	155830896	chr1	156036378	156042041	chr1	155829933	155830429	shCONT_rep1
chr1	155826456	155830896	chr1	156072496	156077966	chr1	155826884	155827196	shCONT_rep1
chr1	155826456	155830896	chr1	156072496	156077966	chr1	155829933	155830429	shCONT_rep1
chr1	155826456	155830896	chr1	156465546	156475801	chr1	155826884	155827196	shCONT_rep1
chr1	155826456	155830896	chr1	156465546	156475801	chr1	155829933	155830429	shCONT_rep1
chr1	155837568	155838745	chr1	155879932	155882420	chr1	155880997	155881364	shCONT_rep1
chr1	155843768	155846249	chr1	156022662	156025662	chr1	156023397	156023738	shCONT_rep1
chr1	155876266	155879387	chr1	155879932	155882420	chr1	155880997	155881364	shCONT_rep1
chr1	155879932	155882420	chr1	155885287	155886553	chr1	155880997	155881364	shCONT_rep1
chr1	155879932	155882420	chr1	155887880	155891505	chr1	155880997	155881364	shCONT_rep1
chr1	155879932	155882420	chr1	155902897	155905624	chr1	155880997	155881364	shCONT_rep1
chr1	155879932	155882420	chr1	155902897	155905624	chr1	155904035	155904533	shCONT_rep1
chr1	155879932	155882420	chr1	155909323	155912491	chr1	155880997	155881364	shCONT_rep1
chr1	155879932	155882420	chr1	155930121	155933664	chr1	155880997	155881364	shCONT_rep1
chr1	155879932	155882420	chr1	155951787	155954223	chr1	155880997	155881364	shCONT_rep1
chr1	155879932	155882420	chr1	155958282	155961143	chr1	155880997	155881364	shCONT_rep1
chr1	155879932	155882420	chr1	156130712	156134115	chr1	155880997	155881364	shCONT_rep1
chr1	155887880	155891505	chr1	155902897	155905624	chr1	155904035	155904533	shCONT_rep1
chr1	155896674	155898569	chr1	155902897	155905624	chr1	155904035	155904533	shCONT_rep1
chr1	155899555	155902169	chr1	155902897	155905624	chr1	155904035	155904533	shCONT_rep1
chr1	155899555	155902169	chr1	156022662	156025662	chr1	156023397	156023738	shCONT_rep1
chr1	155902897	155905624	chr1	155907752	155908952	chr1	155904035	155904533	shCONT_rep1
chr1	155902897	155905624	chr1	155909323	155912491	chr1	155904035	155904533	shCONT_rep1
chr1	155902897	155905624	chr1	155915188	155916500	chr1	155904035	155904533	shCONT_rep1
chr1	155902897	155905624	chr1	155919280	155925091	chr1	155904035	155904533	shCONT_rep1
chr1	155902897	155905624	chr1	155930121	155933664	chr1	155904035	155904533	shCONT_rep1
chr1	155902897	155905624	chr1	155934903	155936569	chr1	155904035	155904533	shCONT_rep1
chr1	155902897	155905624	chr1	155948131	155950607	chr1	155904035	155904533	shCONT_rep1
chr1	155902897	155905624	chr1	155951787	155954223	chr1	155904035	155904533	shCONT_rep1
chr1	155902897	155905624	chr1	155958282	155961143	chr1	155904035	155904533	shCONT_rep1
chr1	155902897	155905624	chr1	155961570	155962997	chr1	155904035	155904533	shCONT_rep1
chr1	155902897	155905624	chr1	155963950	155965252	chr1	155904035	155904533	shCONT_rep1
chr1	155902897	155905624	chr1	155969983	155971682	chr1	155904035	155904533	shCONT_rep1
chr1	155902897	155905624	chr1	155989733	155995043	chr1	155904035	155904533	shCONT_rep1
chr1	155902897	155905624	chr1	156022662	156025662	chr1	155904035	155904533	shCONT_rep1
chr1	155902897	155905624	chr1	156022662	156025662	chr1	156023397	156023738	shCONT_rep1
chr1	155902897	155905624	chr1	156036378	156042041	chr1	155904035	155904533	shCONT_rep1
chr1	155902897	155905624	chr1	156055747	156061565	chr1	155904035	155904533	shCONT_rep1
chr1	155902897	155905624	chr1	156092042	156094345	chr1	155904035	155904533	shCONT_rep1
chr1	155909323	155912491	chr1	156022662	156025662	chr1	156023397	156023738	shCONT_rep1
chr1	155930121	155933664	chr1	156022662	156025662	chr1	156023397	156023738	shCONT_rep1
chr1	155934903	155936569	chr1	156022662	156025662	chr1	156023397	156023738	shCONT_rep1
chr1	155940579	155943740	chr1	156022662	156025662	chr1	156023397	156023738	shCONT_rep1
chr1	155948131	155950607	chr1	156022662	156025662	chr1	156023397	156023738	shCONT_rep1
chr1	155948131	155950607	chr1	156182641	156185011	chr1	156182626	156182985	shCONT_rep1
chr1	155951787	155954223	chr1	156022662	156025662	chr1	156023397	156023738	shCONT_rep1
chr1	155958282	155961143	chr1	156022662	156025662	chr1	156023397	156023738	shCONT_rep1
chr1	155969983	155971682	chr1	156022662	156025662	chr1	156023397	156023738	shCONT_rep1
chr1	155989733	155995043	chr1	156022662	156025662	chr1	156023397	156023738	shCONT_rep1
chr1	155989733	155995043	chr1	156251107	156253478	chr1	156252311	156252866	shCONT_rep1
chr1	155999056	156000821	chr1	156022662	156025662	chr1	156023397	156023738	shCONT_rep1
chr1	156006310	156009469	chr1	156022662	156025662	chr1	156023397	156023738	shCONT_rep1
chr1	156012269	156015341	chr1	156022662	156025662	chr1	156023397	156023738	shCONT_rep1
chr1	156017362	156021113	chr1	156022662	156025662	chr1	156023397	156023738	shCONT_rep1
chr1	156022662	156025662	chr1	156027220	156031550	chr1	156023397	156023738	shCONT_rep1
chr1	156022662	156025662	chr1	156034114	156035305	chr1	156023397	156023738	shCONT_rep1
chr1	156022662	156025662	chr1	156036378	156042041	chr1	156023397	156023738	shCONT_rep1
chr1	156022662	156025662	chr1	156051764	156053783	chr1	156023397	156023738	shCONT_rep1
chr1	156022662	156025662	chr1	156055747	156061565	chr1	156023397	156023738	shCONT_rep1
chr1	156022662	156025662	chr1	156065868	156069840	chr1	156023397	156023738	shCONT_rep1
chr1	156022662	156025662	chr1	156072496	156077966	chr1	156023397	156023738	shCONT_rep1
chr1	156022662	156025662	chr1	156144750	156147310	chr1	156023397	156023738	shCONT_rep1
chr1	156027220	156031550	chr1	156161980	156164236	chr1	156163591	156163877	shCONT_rep1
chr1	156051764	156053783	chr1	156251107	156253478	chr1	156252311	156252866	shCONT_rep1
chr1	156055747	156061565	chr1	156161980	156164236	chr1	156163591	156163877	shCONT_rep1
chr1	156055747	156061565	chr1	156182641	156185011	chr1	156182626	156182985	shCONT_rep1
chr1	156072496	156077966	chr1	156161980	156164236	chr1	156163591	156163877	shCONT_rep1
chr1	156072496	156077966	chr1	156182641	156185011	chr1	156182626	156182985	shCONT_rep1
chr1	156082116	156086734	chr1	156182641	156185011	chr1	156182626	156182985	shCONT_rep1
chr1	156109888	156112097	chr1	156251107	156253478	chr1	156252311	156252866	shCONT_rep1
chr1	156117870	156119063	chr1	156161980	156164236	chr1	156163591	156163877	shCONT_rep1
chr1	156122617	156125501	chr1	156161980	156164236	chr1	156163591	156163877	shCONT_rep1
chr1	156122617	156125501	chr1	156182641	156185011	chr1	156182626	156182985	shCONT_rep1
chr1	156122617	156125501	chr1	156251107	156253478	chr1	156252311	156252866	shCONT_rep1
chr1	156126058	156127202	chr1	156161980	156164236	chr1	156163591	156163877	shCONT_rep1
chr1	156130712	156134115	chr1	156182641	156185011	chr1	156182626	156182985	shCONT_rep1
chr1	156138218	156143260	chr1	156161980	156164236	chr1	156163591	156163877	shCONT_rep1
chr1	156138218	156143260	chr1	156182641	156185011	chr1	156182626	156182985	shCONT_rep1
chr1	156138218	156143260	chr1	156381370	156385572	chr1	156382393	156382624	shCONT_rep1
chr1	156144750	156147310	chr1	156161980	156164236	chr1	156163591	156163877	shCONT_rep1
chr1	156154127	156156612	chr1	156161980	156164236	chr1	156163591	156163877	shCONT_rep1
chr1	156154127	156156612	chr1	156182641	156185011	chr1	156182626	156182985	shCONT_rep1
chr1	156160009	156161184	chr1	156161980	156164236	chr1	156163591	156163877	shCONT_rep1
chr1	156161980	156164236	chr1	156168336	156170774	chr1	156163591	156163877	shCONT_rep1
chr1	156161980	156164236	chr1	156203136	156206162	chr1	156163591	156163877	shCONT_rep1
chr1	156161980	156164236	chr1	156210436	156214346	chr1	156163591	156163877	shCONT_rep1
chr1	156161980	156164236	chr1	156219017	156222332	chr1	156163591	156163877	shCONT_rep1
chr1	156166156	156167466	chr1	156251107	156253478	chr1	156252311	156252866	shCONT_rep1
chr1	156168336	156170774	chr1	156182641	156185011	chr1	156182626	156182985	shCONT_rep1
chr1	156168336	156170774	chr1	222790202	222796276	chr1	222791389	222791743	shCONT_rep1
chr1	156173310	156174886	chr1	156182641	156185011	chr1	156182626	156182985	shCONT_rep1
chr1	156182641	156185011	chr1	156191125	156192329	chr1	156182626	156182985	shCONT_rep1
chr1	156182641	156185011	chr1	156192976	156194197	chr1	156182626	156182985	shCONT_rep1
chr1	156182641	156185011	chr1	156208108	156209523	chr1	156182626	156182985	shCONT_rep1
chr1	156182641	156185011	chr1	156210436	156214346	chr1	156182626	156182985	shCONT_rep1
chr1	156182641	156185011	chr1	156219017	156222332	chr1	156182626	156182985	shCONT_rep1
chr1	156182641	156185011	chr1	156227263	156231935	chr1	156182626	156182985	shCONT_rep1
chr1	156194742	156197474	chr1	156251107	156253478	chr1	156252311	156252866	shCONT_rep1
chr1	156210436	156214346	chr1	156251107	156253478	chr1	156252311	156252866	shCONT_rep1
chr1	156219017	156222332	chr1	156251107	156253478	chr1	156252311	156252866	shCONT_rep1
chr1	156219017	156222332	chr1	156381370	156385572	chr1	156382393	156382624	shCONT_rep1
chr1	156227263	156231935	chr1	156251107	156253478	chr1	156252311	156252866	shCONT_rep1
chr1	156232632	156234214	chr1	156251107	156253478	chr1	156252311	156252866	shCONT_rep1
chr1	156234978	156236930	chr1	156251107	156253478	chr1	156252311	156252866	shCONT_rep1
chr1	156243314	156245288	chr1	156251107	156253478	chr1	156252311	156252866	shCONT_rep1
chr1	156246089	156247328	chr1	156251107	156253478	chr1	156252311	156252866	shCONT_rep1
chr1	156251107	156253478	chr1	156254223	156256026	chr1	156252311	156252866	shCONT_rep1
chr1	156251107	156253478	chr1	156260599	156264595	chr1	156252311	156252866	shCONT_rep1
chr1	156251107	156253478	chr1	156268285	156269639	chr1	156252311	156252866	shCONT_rep1
chr1	156251107	156253478	chr1	156269959	156273631	chr1	156252311	156252866	shCONT_rep1
chr1	156251107	156253478	chr1	156278284	156282576	chr1	156252311	156252866	shCONT_rep1
chr1	156251107	156253478	chr1	156287956	156290900	chr1	156252311	156252866	shCONT_rep1
chr1	156251107	156253478	chr1	156293847	156296304	chr1	156252311	156252866	shCONT_rep1
chr1	156251107	156253478	chr1	156305553	156308953	chr1	156252311	156252866	shCONT_rep1
chr1	156251107	156253478	chr1	156310390	156313999	chr1	156252311	156252866	shCONT_rep1
chr1	156251107	156253478	chr1	156326796	156331434	chr1	156252311	156252866	shCONT_rep1
chr1	156251107	156253478	chr1	156335881	156339544	chr1	156252311	156252866	shCONT_rep1
chr1	156251107	156253478	chr1	156340263	156342911	chr1	156252311	156252866	shCONT_rep1
chr1	156251107	156253478	chr1	156352213	156356174	chr1	156252311	156252866	shCONT_rep1
chr1	156251107	156253478	chr1	156388551	156394353	chr1	156252311	156252866	shCONT_rep1
chr1	156251107	156253478	chr1	156416997	156418403	chr1	156252311	156252866	shCONT_rep1
chr1	156251107	156253478	chr1	156449314	156455247	chr1	156252311	156252866	shCONT_rep1
chr1	156260599	156264595	chr1	156381370	156385572	chr1	156382393	156382624	shCONT_rep1
chr1	156310390	156313999	chr1	156381370	156385572	chr1	156382393	156382624	shCONT_rep1
chr1	156335881	156339544	chr1	156381370	156385572	chr1	156382393	156382624	shCONT_rep1
chr1	156345859	156348259	chr1	156381370	156385572	chr1	156382393	156382624	shCONT_rep1
chr1	156352213	156356174	chr1	156381370	156385572	chr1	156382393	156382624	shCONT_rep1
chr1	156356456	156360285	chr1	156381370	156385572	chr1	156382393	156382624	shCONT_rep1
chr1	156360701	156365453	chr1	156381370	156385572	chr1	156382393	156382624	shCONT_rep1
chr1	156366307	156367501	chr1	156381370	156385572	chr1	156382393	156382624	shCONT_rep1
chr1	156368838	156373692	chr1	156381370	156385572	chr1	156382393	156382624	shCONT_rep1
chr1	156368838	156373692	chr1	156735109	156738961	chr1	156737222	156737645	shCONT_rep1
chr1	156375247	156377078	chr1	156381370	156385572	chr1	156382393	156382624	shCONT_rep1
chr1	156377380	156379922	chr1	156381370	156385572	chr1	156382393	156382624	shCONT_rep1
chr1	156381370	156385572	chr1	156388551	156394353	chr1	156382393	156382624	shCONT_rep1
chr1	156381370	156385572	chr1	156395899	156397032	chr1	156382393	156382624	shCONT_rep1
chr1	156381370	156385572	chr1	156399263	156402270	chr1	156382393	156382624	shCONT_rep1
chr1	156381370	156385572	chr1	156405701	156408002	chr1	156382393	156382624	shCONT_rep1
chr1	156381370	156385572	chr1	156409094	156410483	chr1	156382393	156382624	shCONT_rep1
chr1	156381370	156385572	chr1	156416997	156418403	chr1	156382393	156382624	shCONT_rep1
chr1	156381370	156385572	chr1	156423502	156427372	chr1	156382393	156382624	shCONT_rep1
chr1	156381370	156385572	chr1	156449314	156455247	chr1	156382393	156382624	shCONT_rep1
chr1	156381370	156385572	chr1	156541142	156543831	chr1	156382393	156382624	shCONT_rep1
chr1	156381370	156385572	chr1	182123481	182126449	chr1	156382393	156382624	shCONT_rep1
chr1	156465546	156475801	chr1	156735109	156738961	chr1	156737222	156737645	shCONT_rep1
chr1	156564910	156567185	chr1	156735109	156738961	chr1	156737222	156737645	shCONT_rep1
chr1	156643511	156648678	chr1	156735109	156738961	chr1	156737222	156737645	shCONT_rep1
chr1	156660640	156664555	chr1	156735109	156738961	chr1	156737222	156737645	shCONT_rep1
chr1	156669269	156671792	chr1	156735109	156738961	chr1	156737222	156737645	shCONT_rep1
chr1	156676271	156683146	chr1	156735109	156738961	chr1	156737222	156737645	shCONT_rep1
chr1	156690268	156692227	chr1	156735109	156738961	chr1	156737222	156737645	shCONT_rep1
chr1	156696058	156697203	chr1	156735109	156738961	chr1	156737222	156737645	shCONT_rep1
chr1	156697630	156700332	chr1	156735109	156738961	chr1	156737222	156737645	shCONT_rep1
chr1	156701210	156703018	chr1	156735109	156738961	chr1	156737222	156737645	shCONT_rep1
chr1	156705117	156706423	chr1	156735109	156738961	chr1	156737222	156737645	shCONT_rep1
chr1	156708293	156709426	chr1	156735109	156738961	chr1	156737222	156737645	shCONT_rep1
chr1	156709697	156711837	chr1	156735109	156738961	chr1	156737222	156737645	shCONT_rep1
chr1	156712350	156714216	chr1	156735109	156738961	chr1	156737222	156737645	shCONT_rep1
chr1	156716764	156720718	chr1	156735109	156738961	chr1	156737222	156737645	shCONT_rep1
chr1	156721002	156726203	chr1	156735109	156738961	chr1	156737222	156737645	shCONT_rep1
chr1	156726931	156728122	chr1	156735109	156738961	chr1	156737222	156737645	shCONT_rep1
chr1	156729356	156730676	chr1	156735109	156738961	chr1	156737222	156737645	shCONT_rep1
chr1	156731734	156732867	chr1	156735109	156738961	chr1	156737222	156737645	shCONT_rep1
chr1	156735109	156738961	chr1	156739287	156740420	chr1	156737222	156737645	shCONT_rep1
chr1	156735109	156738961	chr1	156742446	156743956	chr1	156737222	156737645	shCONT_rep1
chr1	156735109	156738961	chr1	156745059	156747019	chr1	156737222	156737645	shCONT_rep1
chr1	156735109	156738961	chr1	156748958	156752363	chr1	156737222	156737645	shCONT_rep1
chr1	156735109	156738961	chr1	156756244	156758490	chr1	156737222	156737645	shCONT_rep1
chr1	156735109	156738961	chr1	156761535	156766472	chr1	156737222	156737645	shCONT_rep1
chr1	156735109	156738961	chr1	156771347	156772551	chr1	156737222	156737645	shCONT_rep1
chr1	156735109	156738961	chr1	156773034	156776859	chr1	156737222	156737645	shCONT_rep1
chr1	156735109	156738961	chr1	156781643	156786999	chr1	156737222	156737645	shCONT_rep1
chr1	156735109	156738961	chr1	156807449	156808582	chr1	156737222	156737645	shCONT_rep1
chr1	156735109	156738961	chr1	156810332	156813249	chr1	156737222	156737645	shCONT_rep1
chr1	156735109	156738961	chr1	156818193	156822837	chr1	156737222	156737645	shCONT_rep1
chr1	156735109	156738961	chr1	156831432	156835138	chr1	156737222	156737645	shCONT_rep1
chr1	156735109	156738961	chr1	156840634	156841924	chr1	156737222	156737645	shCONT_rep1
chr1	156735109	156738961	chr1	156842298	156846068	chr1	156737222	156737645	shCONT_rep1
chr1	156735109	156738961	chr1	156851875	156856060	chr1	156737222	156737645	shCONT_rep1
chr1	156735109	156738961	chr1	156868793	156872856	chr1	156737222	156737645	shCONT_rep1
chr1	156735109	156738961	chr1	156898675	156899808	chr1	156737222	156737645	shCONT_rep1
chr1	156735109	156738961	chr1	156921961	156925052	chr1	156737222	156737645	shCONT_rep1
chr1	156735109	156738961	chr1	167596824	167598456	chr1	156737222	156737645	shCONT_rep1
chr1	157059199	157063321	chr1	158080958	158085736	chr1	158083272	158083513	shCONT_rep1
chr1	157073846	157076653	chr1	158080958	158085736	chr1	158083272	158083513	shCONT_rep1
chr1	157486687	157487894	chr1	158080958	158085736	chr1	158083272	158083513	shCONT_rep1
chr1	157934505	157935642	chr1	158080958	158085736	chr1	158083272	158083513	shCONT_rep1
chr1	157948335	157949480	chr1	158080958	158085736	chr1	158083272	158083513	shCONT_rep1
chr1	157954597	157957460	chr1	158080958	158085736	chr1	158083272	158083513	shCONT_rep1
chr1	157959936	157961309	chr1	158080958	158085736	chr1	158083272	158083513	shCONT_rep1
chr1	157961704	157964319	chr1	158080958	158085736	chr1	158083272	158083513	shCONT_rep1
chr1	157975899	157982246	chr1	158080958	158085736	chr1	158083272	158083513	shCONT_rep1
chr1	157994434	157996669	chr1	158080958	158085736	chr1	158083272	158083513	shCONT_rep1
chr1	158004909	158008398	chr1	158080958	158085736	chr1	158083272	158083513	shCONT_rep1
chr1	158011305	158014109	chr1	160252567	160256368	chr1	160254731	160255170	shCONT_rep1
chr1	158022165	158025045	chr1	158080958	158085736	chr1	158083272	158083513	shCONT_rep1
chr1	158034916	158037762	chr1	158080958	158085736	chr1	158083272	158083513	shCONT_rep1
chr1	158041773	158044881	chr1	158080958	158085736	chr1	158083272	158083513	shCONT_rep1
chr1	158047027	158048915	chr1	158080958	158085736	chr1	158083272	158083513	shCONT_rep1
chr1	158062548	158064669	chr1	158080958	158085736	chr1	158083272	158083513	shCONT_rep1
chr1	158068698	158069933	chr1	158080958	158085736	chr1	158083272	158083513	shCONT_rep1
chr1	158070403	158073307	chr1	158080958	158085736	chr1	158083272	158083513	shCONT_rep1
chr1	158075537	158077868	chr1	158080958	158085736	chr1	158083272	158083513	shCONT_rep1
chr1	158080958	158085736	chr1	158087829	158088962	chr1	158083272	158083513	shCONT_rep1
chr1	158080958	158085736	chr1	158093683	158096376	chr1	158083272	158083513	shCONT_rep1
chr1	158080958	158085736	chr1	158097537	158098670	chr1	158083272	158083513	shCONT_rep1
chr1	158080958	158085736	chr1	158110790	158112214	chr1	158083272	158083513	shCONT_rep1
chr1	158080958	158085736	chr1	158113433	158117473	chr1	158083272	158083513	shCONT_rep1
chr1	158080958	158085736	chr1	158490608	158491962	chr1	158083272	158083513	shCONT_rep1
chr1	158080958	158085736	chr1	159041340	159043476	chr1	158083272	158083513	shCONT_rep1
chr1	159027595	159029226	chr1	207924234	207927300	chr1	207925410	207925748	shCONT_rep1
chr1	159839342	159843651	chr1	160230469	160233337	chr1	160232010	160232464	shCONT_rep1
chr1	159988822	159990692	chr1	160230469	160233337	chr1	160232010	160232464	shCONT_rep1
chr1	160006142	160010672	chr1	160311846	160314127	chr1	160313015	160313395	shCONT_rep1
chr1	160016374	160019532	chr1	160311846	160314127	chr1	160313015	160313395	shCONT_rep1
chr1	160027055	160034101	chr1	160252567	160256368	chr1	160254731	160255170	shCONT_rep1
chr1	160047965	160049223	chr1	160369531	160371655	chr1	160370107	160370349	shCONT_rep1
chr1	160050903	160052272	chr1	160252567	160256368	chr1	160254731	160255170	shCONT_rep1
chr1	160052931	160056498	chr1	160252567	160256368	chr1	160254731	160255170	shCONT_rep1
chr1	160060238	160062928	chr1	160230469	160233337	chr1	160232010	160232464	shCONT_rep1
chr1	160060238	160062928	chr1	160252567	160256368	chr1	160254731	160255170	shCONT_rep1
chr1	160064047	160065566	chr1	160230469	160233337	chr1	160232010	160232464	shCONT_rep1
chr1	160064047	160065566	chr1	160252567	160256368	chr1	160254731	160255170	shCONT_rep1
chr1	160069395	160071604	chr1	160230469	160233337	chr1	160232010	160232464	shCONT_rep1
chr1	160069395	160071604	chr1	160252567	160256368	chr1	160254731	160255170	shCONT_rep1
chr1	160069395	160071604	chr1	160311846	160314127	chr1	160313015	160313395	shCONT_rep1
chr1	160078548	160079748	chr1	160311846	160314127	chr1	160313015	160313395	shCONT_rep1
chr1	160090013	160091808	chr1	161013475	161016563	chr1	161015604	161016233	shCONT_rep1
chr1	160097704	160101119	chr1	160230469	160233337	chr1	160232010	160232464	shCONT_rep1
chr1	160097704	160101119	chr1	160252567	160256368	chr1	160254731	160255170	shCONT_rep1
chr1	160120559	160126237	chr1	160230469	160233337	chr1	160232010	160232464	shCONT_rep1
chr1	160137071	160140299	chr1	160174948	160176081	chr1	160175020	160175228	shCONT_rep1
chr1	160137071	160140299	chr1	160252567	160256368	chr1	160254731	160255170	shCONT_rep1
chr1	160155913	160158785	chr1	160174948	160176081	chr1	160175020	160175228	shCONT_rep1
chr1	160155913	160158785	chr1	160230469	160233337	chr1	160232010	160232464	shCONT_rep1
chr1	160155913	160158785	chr1	160252567	160256368	chr1	160254731	160255170	shCONT_rep1
chr1	160159770	160161259	chr1	160230469	160233337	chr1	160232010	160232464	shCONT_rep1
chr1	160161575	160164295	chr1	160252567	160256368	chr1	160254731	160255170	shCONT_rep1
chr1	160166767	160170550	chr1	160174948	160176081	chr1	160175020	160175228	shCONT_rep1
chr1	160166767	160170550	chr1	160252567	160256368	chr1	160254731	160255170	shCONT_rep1
chr1	160166767	160170550	chr1	160311846	160314127	chr1	160313015	160313395	shCONT_rep1
chr1	160170855	160173395	chr1	160174948	160176081	chr1	160175020	160175228	shCONT_rep1
chr1	160174948	160176081	chr1	160176752	160179032	chr1	160175020	160175228	shCONT_rep1
chr1	160174948	160176081	chr1	160179902	160182284	chr1	160175020	160175228	shCONT_rep1
chr1	160174948	160176081	chr1	160186507	160189511	chr1	160175020	160175228	shCONT_rep1
chr1	160176752	160179032	chr1	160252567	160256368	chr1	160254731	160255170	shCONT_rep1
chr1	160179902	160182284	chr1	160252567	160256368	chr1	160254731	160255170	shCONT_rep1
chr1	160186507	160189511	chr1	160230469	160233337	chr1	160232010	160232464	shCONT_rep1
chr1	160186507	160189511	chr1	160252567	160256368	chr1	160254731	160255170	shCONT_rep1
chr1	160196845	160198902	chr1	160252567	160256368	chr1	160254731	160255170	shCONT_rep1
chr1	160207130	160210511	chr1	160230469	160233337	chr1	160232010	160232464	shCONT_rep1
chr1	160207130	160210511	chr1	160252567	160256368	chr1	160254731	160255170	shCONT_rep1
chr1	160207130	160210511	chr1	160311846	160314127	chr1	160313015	160313395	shCONT_rep1
chr1	160214678	160215836	chr1	160252567	160256368	chr1	160254731	160255170	shCONT_rep1
chr1	160221418	160227294	chr1	160230469	160233337	chr1	160232010	160232464	shCONT_rep1
chr1	160230469	160233337	chr1	160241941	160244691	chr1	160232010	160232464	shCONT_rep1
chr1	160230469	160233337	chr1	160247925	160250285	chr1	160232010	160232464	shCONT_rep1
chr1	160230469	160233337	chr1	160252567	160256368	chr1	160232010	160232464	shCONT_rep1
chr1	160230469	160233337	chr1	160252567	160256368	chr1	160254731	160255170	shCONT_rep1
chr1	160230469	160233337	chr1	160323998	160326394	chr1	160232010	160232464	shCONT_rep1
chr1	160230469	160233337	chr1	204119111	204128149	chr1	160232010	160232464	shCONT_rep1
chr1	160241941	160244691	chr1	160252567	160256368	chr1	160254731	160255170	shCONT_rep1
chr1	160247925	160250285	chr1	160252567	160256368	chr1	160254731	160255170	shCONT_rep1
chr1	160247925	160250285	chr1	160311846	160314127	chr1	160313015	160313395	shCONT_rep1
chr1	160252567	160256368	chr1	160259494	160262875	chr1	160254731	160255170	shCONT_rep1
chr1	160252567	160256368	chr1	160265810	160266943	chr1	160254731	160255170	shCONT_rep1
chr1	160252567	160256368	chr1	160311846	160314127	chr1	160254731	160255170	shCONT_rep1
chr1	160252567	160256368	chr1	160311846	160314127	chr1	160313015	160313395	shCONT_rep1
chr1	160252567	160256368	chr1	160330034	160333102	chr1	160254731	160255170	shCONT_rep1
chr1	160252567	160256368	chr1	160344589	160347517	chr1	160254731	160255170	shCONT_rep1
chr1	160311846	160314127	chr1	160316170	160317436	chr1	160313015	160313395	shCONT_rep1
chr1	160311846	160314127	chr1	160321163	160323603	chr1	160313015	160313395	shCONT_rep1
chr1	160311846	160314127	chr1	160330034	160333102	chr1	160313015	160313395	shCONT_rep1
chr1	160311846	160314127	chr1	160333561	160336993	chr1	160313015	160313395	shCONT_rep1
chr1	160311846	160314127	chr1	160340301	160343722	chr1	160313015	160313395	shCONT_rep1
chr1	160311846	160314127	chr1	160395079	160398320	chr1	160313015	160313395	shCONT_rep1
chr1	160311846	160314127	chr1	160788734	160794164	chr1	160313015	160313395	shCONT_rep1
chr1	160311846	160314127	chr1	163440194	163441424	chr1	160313015	160313395	shCONT_rep1
chr1	160330034	160333102	chr1	160369531	160371655	chr1	160370107	160370349	shCONT_rep1
chr1	160333561	160336993	chr1	160369531	160371655	chr1	160370107	160370349	shCONT_rep1
chr1	160340301	160343722	chr1	160369531	160371655	chr1	160370107	160370349	shCONT_rep1
chr1	160365826	160368188	chr1	160369531	160371655	chr1	160370107	160370349	shCONT_rep1
chr1	160369531	160371655	chr1	160372697	160373993	chr1	160370107	160370349	shCONT_rep1
chr1	160369531	160371655	chr1	160374277	160375432	chr1	160370107	160370349	shCONT_rep1
chr1	160369531	160371655	chr1	160376778	160381078	chr1	160370107	160370349	shCONT_rep1
chr1	160369531	160371655	chr1	160385038	160386304	chr1	160370107	160370349	shCONT_rep1
chr1	160509474	160510782	chr1	161013475	161016563	chr1	161015604	161016233	shCONT_rep1
chr1	160649962	160653136	chr1	161101145	161104533	chr1	161102112	161102836	shCONT_rep1
chr1	160687139	160690928	chr1	161127286	161131975	chr1	161129076	161129707	shCONT_rep1
chr1	160695565	160697523	chr1	161013475	161016563	chr1	161015604	161016233	shCONT_rep1
chr1	160920778	160925490	chr1	161101145	161104533	chr1	161102112	161102836	shCONT_rep1
chr1	160920778	160925490	chr1	161127286	161131975	chr1	161129076	161129707	shCONT_rep1
chr1	160928445	160929729	chr1	161013475	161016563	chr1	161015604	161016233	shCONT_rep1
chr1	160946452	160954309	chr1	161013475	161016563	chr1	161015604	161016233	shCONT_rep1
chr1	160946452	160954309	chr1	161127286	161131975	chr1	161129076	161129707	shCONT_rep1
chr1	160958820	160961315	chr1	161013475	161016563	chr1	161015604	161016233	shCONT_rep1
chr1	160958820	160961315	chr1	161127286	161131975	chr1	161129076	161129707	shCONT_rep1
chr1	160964618	160969761	chr1	161013475	161016563	chr1	161015604	161016233	shCONT_rep1
chr1	160964618	160969761	chr1	161087415	161090756	chr1	161087613	161088023	shCONT_rep1
chr1	160964618	160969761	chr1	161101145	161104533	chr1	161102112	161102836	shCONT_rep1
chr1	160964618	160969761	chr1	161127286	161131975	chr1	161129076	161129707	shCONT_rep1
chr1	160977059	160981728	chr1	161127286	161131975	chr1	161129076	161129707	shCONT_rep1
chr1	160991977	160993256	chr1	161013475	161016563	chr1	161015604	161016233	shCONT_rep1
chr1	160993676	160995550	chr1	161013475	161016563	chr1	161015604	161016233	shCONT_rep1
chr1	161000508	161003042	chr1	161087415	161090756	chr1	161087613	161088023	shCONT_rep1
chr1	161005020	161006202	chr1	161013475	161016563	chr1	161015604	161016233	shCONT_rep1
chr1	161006560	161010318	chr1	161013475	161016563	chr1	161015604	161016233	shCONT_rep1
chr1	161006560	161010318	chr1	161194872	161197736	chr1	161195582	161196023	shCONT_rep1
chr1	161013475	161016563	chr1	161018608	161020063	chr1	161015604	161016233	shCONT_rep1
chr1	161013475	161016563	chr1	161020508	161022896	chr1	161015604	161016233	shCONT_rep1
chr1	161013475	161016563	chr1	161023550	161024736	chr1	161015604	161016233	shCONT_rep1
chr1	161013475	161016563	chr1	161034335	161036604	chr1	161015604	161016233	shCONT_rep1
chr1	161013475	161016563	chr1	161040073	161044995	chr1	161015604	161016233	shCONT_rep1
chr1	161013475	161016563	chr1	161050004	161051476	chr1	161015604	161016233	shCONT_rep1
chr1	161013475	161016563	chr1	161052819	161055161	chr1	161015604	161016233	shCONT_rep1
chr1	161013475	161016563	chr1	161059191	161060457	chr1	161015604	161016233	shCONT_rep1
chr1	161013475	161016563	chr1	161066535	161068332	chr1	161015604	161016233	shCONT_rep1
chr1	161013475	161016563	chr1	161087415	161090756	chr1	161015604	161016233	shCONT_rep1
chr1	161013475	161016563	chr1	161087415	161090756	chr1	161087613	161088023	shCONT_rep1
chr1	161013475	161016563	chr1	161101145	161104533	chr1	161015604	161016233	shCONT_rep1
chr1	161013475	161016563	chr1	161101145	161104533	chr1	161102112	161102836	shCONT_rep1
chr1	161013475	161016563	chr1	161107097	161108284	chr1	161015604	161016233	shCONT_rep1
chr1	161013475	161016563	chr1	165616665	165618549	chr1	161015604	161016233	shCONT_rep1
chr1	161013475	161016563	chr1	182334455	182337245	chr1	161015604	161016233	shCONT_rep1
chr1	161020508	161022896	chr1	161087415	161090756	chr1	161087613	161088023	shCONT_rep1
chr1	161034335	161036604	chr1	161101145	161104533	chr1	161102112	161102836	shCONT_rep1
chr1	161040073	161044995	chr1	161101145	161104533	chr1	161102112	161102836	shCONT_rep1
chr1	161040073	161044995	chr1	161127286	161131975	chr1	161129076	161129707	shCONT_rep1
chr1	161069062	161070376	chr1	161087415	161090756	chr1	161087613	161088023	shCONT_rep1
chr1	161073071	161074512	chr1	161087415	161090756	chr1	161087613	161088023	shCONT_rep1
chr1	161076776	161078123	chr1	161087415	161090756	chr1	161087613	161088023	shCONT_rep1
chr1	161076776	161078123	chr1	161101145	161104533	chr1	161102112	161102836	shCONT_rep1
chr1	161078938	161080202	chr1	161101145	161104533	chr1	161102112	161102836	shCONT_rep1
chr1	161082544	161083786	chr1	161087415	161090756	chr1	161087613	161088023	shCONT_rep1
chr1	161082544	161083786	chr1	161127286	161131975	chr1	161129076	161129707	shCONT_rep1
chr1	161084722	161086333	chr1	161087415	161090756	chr1	161087613	161088023	shCONT_rep1
chr1	161087415	161090756	chr1	161093230	161094440	chr1	161087613	161088023	shCONT_rep1
chr1	161087415	161090756	chr1	161095845	161097111	chr1	161087613	161088023	shCONT_rep1
chr1	161087415	161090756	chr1	161101145	161104533	chr1	161087613	161088023	shCONT_rep1
chr1	161087415	161090756	chr1	161101145	161104533	chr1	161102112	161102836	shCONT_rep1
chr1	161087415	161090756	chr1	161107097	161108284	chr1	161087613	161088023	shCONT_rep1
chr1	161087415	161090756	chr1	161127286	161131975	chr1	161087613	161088023	shCONT_rep1
chr1	161087415	161090756	chr1	161127286	161131975	chr1	161129076	161129707	shCONT_rep1
chr1	161087415	161090756	chr1	161140145	161143755	chr1	161087613	161088023	shCONT_rep1
chr1	161087415	161090756	chr1	161148961	161150227	chr1	161087613	161088023	shCONT_rep1
chr1	161087415	161090756	chr1	161155510	161157030	chr1	161087613	161088023	shCONT_rep1
chr1	161087415	161090756	chr1	161169240	161171829	chr1	161087613	161088023	shCONT_rep1
chr1	161087415	161090756	chr1	161199004	161203716	chr1	161087613	161088023	shCONT_rep1
chr1	161093230	161094440	chr1	161101145	161104533	chr1	161102112	161102836	shCONT_rep1
chr1	161095845	161097111	chr1	161101145	161104533	chr1	161102112	161102836	shCONT_rep1
chr1	161101145	161104533	chr1	161109599	161111781	chr1	161102112	161102836	shCONT_rep1
chr1	161101145	161104533	chr1	161118004	161119358	chr1	161102112	161102836	shCONT_rep1
chr1	161101145	161104533	chr1	161127286	161131975	chr1	161102112	161102836	shCONT_rep1
chr1	161101145	161104533	chr1	161127286	161131975	chr1	161129076	161129707	shCONT_rep1
chr1	161101145	161104533	chr1	161135382	161137441	chr1	161102112	161102836	shCONT_rep1
chr1	161101145	161104533	chr1	161140145	161143755	chr1	161102112	161102836	shCONT_rep1
chr1	161101145	161104533	chr1	161146189	161148187	chr1	161102112	161102836	shCONT_rep1
chr1	161101145	161104533	chr1	161146189	161148187	chr1	161147011	161147497	shCONT_rep1
chr1	161109599	161111781	chr1	161127286	161131975	chr1	161129076	161129707	shCONT_rep1
chr1	161118004	161119358	chr1	161146189	161148187	chr1	161147011	161147497	shCONT_rep1
chr1	161120084	161121277	chr1	161127286	161131975	chr1	161129076	161129707	shCONT_rep1
chr1	161124076	161125225	chr1	161127286	161131975	chr1	161129076	161129707	shCONT_rep1
chr1	161124076	161125225	chr1	161146189	161148187	chr1	161147011	161147497	shCONT_rep1
chr1	161127286	161131975	chr1	161135382	161137441	chr1	161129076	161129707	shCONT_rep1
chr1	161127286	161131975	chr1	161138295	161139576	chr1	161129076	161129707	shCONT_rep1
chr1	161127286	161131975	chr1	161140145	161143755	chr1	161129076	161129707	shCONT_rep1
chr1	161127286	161131975	chr1	161165765	161168934	chr1	161129076	161129707	shCONT_rep1
chr1	161127286	161131975	chr1	161169240	161171829	chr1	161129076	161129707	shCONT_rep1
chr1	161127286	161131975	chr1	161194872	161197736	chr1	161129076	161129707	shCONT_rep1
chr1	161127286	161131975	chr1	161194872	161197736	chr1	161195582	161196023	shCONT_rep1
chr1	161127286	161131975	chr1	161262871	161266949	chr1	161129076	161129707	shCONT_rep1
chr1	161127286	161131975	chr1	227678154	227681224	chr1	161129076	161129707	shCONT_rep1
chr1	161127286	161131975	chr1	243887616	243888954	chr1	161129076	161129707	shCONT_rep1
chr1	161135382	161137441	chr1	161146189	161148187	chr1	161147011	161147497	shCONT_rep1
chr1	161138295	161139576	chr1	161146189	161148187	chr1	161147011	161147497	shCONT_rep1
chr1	161140145	161143755	chr1	161146189	161148187	chr1	161147011	161147497	shCONT_rep1
chr1	161140145	161143755	chr1	161194872	161197736	chr1	161195582	161196023	shCONT_rep1
chr1	161140145	161143755	chr1	161283044	161285071	chr1	161283980	161284377	shCONT_rep1
chr1	161146189	161148187	chr1	161148961	161150227	chr1	161147011	161147497	shCONT_rep1
chr1	161146189	161148187	chr1	161151681	161154631	chr1	161147011	161147497	shCONT_rep1
chr1	161146189	161148187	chr1	161155510	161157030	chr1	161147011	161147497	shCONT_rep1
chr1	161146189	161148187	chr1	161160626	161161759	chr1	161147011	161147497	shCONT_rep1
chr1	161146189	161148187	chr1	161165765	161168934	chr1	161147011	161147497	shCONT_rep1
chr1	161146189	161148187	chr1	161183172	161184305	chr1	161147011	161147497	shCONT_rep1
chr1	161151681	161154631	chr1	161194872	161197736	chr1	161195582	161196023	shCONT_rep1
chr1	161155510	161157030	chr1	161194872	161197736	chr1	161195582	161196023	shCONT_rep1
chr1	161160626	161161759	chr1	161190682	161191834	chr1	161190454	161190801	shCONT_rep1
chr1	161162135	161164339	chr1	161194872	161197736	chr1	161195582	161196023	shCONT_rep1
chr1	161165765	161168934	chr1	161194872	161197736	chr1	161195582	161196023	shCONT_rep1
chr1	161165765	161168934	chr1	161283044	161285071	chr1	161283980	161284377	shCONT_rep1
chr1	161169240	161171829	chr1	161194872	161197736	chr1	161195582	161196023	shCONT_rep1
chr1	161178521	161181139	chr1	161194872	161197736	chr1	161195582	161196023	shCONT_rep1
chr1	161178521	161181139	chr1	161283044	161285071	chr1	161283980	161284377	shCONT_rep1
chr1	161186991	161189044	chr1	161190682	161191834	chr1	161190454	161190801	shCONT_rep1
chr1	161186991	161189044	chr1	161194872	161197736	chr1	161195582	161196023	shCONT_rep1
chr1	161186991	161189044	chr1	161283044	161285071	chr1	161283980	161284377	shCONT_rep1
chr1	16119047	16122063	chr1	16160253	16164033	chr1	16161224	16161781	shCONT_rep1
chr1	161190682	161191834	chr1	161194872	161197736	chr1	161190454	161190801	shCONT_rep1
chr1	161190682	161191834	chr1	161194872	161197736	chr1	161195582	161196023	shCONT_rep1
chr1	161190682	161191834	chr1	161334531	161337766	chr1	161190454	161190801	shCONT_rep1
chr1	161190682	161191834	chr1	161340213	161341642	chr1	161190454	161190801	shCONT_rep1
chr1	161192709	161193978	chr1	161194872	161197736	chr1	161195582	161196023	shCONT_rep1
chr1	161194872	161197736	chr1	161199004	161203716	chr1	161195582	161196023	shCONT_rep1
chr1	161194872	161197736	chr1	161207153	161208547	chr1	161195582	161196023	shCONT_rep1
chr1	161194872	161197736	chr1	161220575	161221841	chr1	161195582	161196023	shCONT_rep1
chr1	161194872	161197736	chr1	161226179	161229267	chr1	161195582	161196023	shCONT_rep1
chr1	161194872	161197736	chr1	161305888	161307784	chr1	161195582	161196023	shCONT_rep1
chr1	161194872	161197736	chr1	161326446	161328542	chr1	161195582	161196023	shCONT_rep1
chr1	161194872	161197736	chr1	161334531	161337766	chr1	161195582	161196023	shCONT_rep1
chr1	161194872	161197736	chr1	161340213	161341642	chr1	161195582	161196023	shCONT_rep1
chr1	161194872	161197736	chr1	161346329	161348654	chr1	161195582	161196023	shCONT_rep1
chr1	161194872	161197736	chr1	161350704	161351837	chr1	161195582	161196023	shCONT_rep1
chr1	161194872	161197736	chr1	161375433	161380864	chr1	161195582	161196023	shCONT_rep1
chr1	161199004	161203716	chr1	161283044	161285071	chr1	161283980	161284377	shCONT_rep1
chr1	161226179	161229267	chr1	161283044	161285071	chr1	161283980	161284377	shCONT_rep1
chr1	16123706	16124932	chr1	16160253	16164033	chr1	16161224	16161781	shCONT_rep1
chr1	16125250	16128065	chr1	16160253	16164033	chr1	16161224	16161781	shCONT_rep1
chr1	161274355	161276905	chr1	161283044	161285071	chr1	161283980	161284377	shCONT_rep1
chr1	161279451	161282082	chr1	161283044	161285071	chr1	161283980	161284377	shCONT_rep1
chr1	161283044	161285071	chr1	161286235	161287748	chr1	161283980	161284377	shCONT_rep1
chr1	161283044	161285071	chr1	161289033	161292129	chr1	161283980	161284377	shCONT_rep1
chr1	161283044	161285071	chr1	161298510	161300109	chr1	161283980	161284377	shCONT_rep1
chr1	161283044	161285071	chr1	161300525	161301658	chr1	161283980	161284377	shCONT_rep1
chr1	161283044	161285071	chr1	161304101	161305423	chr1	161283980	161284377	shCONT_rep1
chr1	161283044	161285071	chr1	161334531	161337766	chr1	161283980	161284377	shCONT_rep1
chr1	161283044	161285071	chr1	161375433	161380864	chr1	161283980	161284377	shCONT_rep1
chr1	16130721	16131868	chr1	16160253	16164033	chr1	16161224	16161781	shCONT_rep1
chr1	161340213	161341642	chr1	165795112	165797659	chr1	165797031	165797280	shCONT_rep1
chr1	16139050	16140628	chr1	16160253	16164033	chr1	16161224	16161781	shCONT_rep1
chr1	16146959	16148160	chr1	16160253	16164033	chr1	16161224	16161781	shCONT_rep1
chr1	16155042	16157544	chr1	16160253	16164033	chr1	16161224	16161781	shCONT_rep1
chr1	16160253	16164033	chr1	121483866	121486018	chr1	16161224	16161781	shCONT_rep1
chr1	16160253	16164033	chr1	16165341	16166637	chr1	16161224	16161781	shCONT_rep1
chr1	16160253	16164033	chr1	16167186	16168319	chr1	16161224	16161781	shCONT_rep1
chr1	16160253	16164033	chr1	16170607	16171915	chr1	16161224	16161781	shCONT_rep1
chr1	16160253	16164033	chr1	16172453	16174690	chr1	16161224	16161781	shCONT_rep1
chr1	16160253	16164033	chr1	16175336	16177660	chr1	16161224	16161781	shCONT_rep1
chr1	16160253	16164033	chr1	16207309	16214758	chr1	16161224	16161781	shCONT_rep1
chr1	16160253	16164033	chr1	16230103	16231291	chr1	16161224	16161781	shCONT_rep1
chr1	16160253	16164033	chr1	16262139	16264967	chr1	16161224	16161781	shCONT_rep1
chr1	16160253	16164033	chr1	16273767	16277649	chr1	16161224	16161781	shCONT_rep1
chr1	16160253	16164033	chr1	16278579	16280652	chr1	16161224	16161781	shCONT_rep1
chr1	16160253	16164033	chr1	16283692	16287619	chr1	16161224	16161781	shCONT_rep1
chr1	16160253	16164033	chr1	16290299	16291740	chr1	16161224	16161781	shCONT_rep1
chr1	16160253	16164033	chr1	16316462	16320975	chr1	16161224	16161781	shCONT_rep1
chr1	16160253	16164033	chr1	16324515	16326304	chr1	16161224	16161781	shCONT_rep1
chr1	16160253	16164033	chr1	16371532	16375166	chr1	16161224	16161781	shCONT_rep1
chr1	16160253	16164033	chr1	16434794	16436892	chr1	16161224	16161781	shCONT_rep1
chr1	16160253	16164033	chr1	27453315	27454777	chr1	16161224	16161781	shCONT_rep1
chr1	161704814	161707224	chr1	161718753	161722132	chr1	161719362	161720019	shCONT_rep1
chr1	161711748	161717328	chr1	161718753	161722132	chr1	161719362	161720019	shCONT_rep1
chr1	161718753	161722132	chr1	161726564	161729415	chr1	161719362	161720019	shCONT_rep1
chr1	161718753	161722132	chr1	161732392	161734117	chr1	161719362	161720019	shCONT_rep1
chr1	161718753	161722132	chr1	161734468	161736983	chr1	161719362	161720019	shCONT_rep1
chr1	161718753	161722132	chr1	162112901	162119722	chr1	161719362	161720019	shCONT_rep1
chr1	161718753	161722132	chr1	173506761	173509783	chr1	161719362	161720019	shCONT_rep1
chr1	161941765	161943588	chr1	162465720	162468849	chr1	162467490	162467971	shCONT_rep1
chr1	162037853	162040821	chr1	162465720	162468849	chr1	162467490	162467971	shCONT_rep1
chr1	162055432	162060156	chr1	162465720	162468849	chr1	162467490	162467971	shCONT_rep1
chr1	162112901	162119722	chr1	162465720	162468849	chr1	162467490	162467971	shCONT_rep1
chr1	162134899	162142914	chr1	182806189	182809861	chr1	182808374	182808635	shCONT_rep1
chr1	162186887	162192347	chr1	162465720	162468849	chr1	162467490	162467971	shCONT_rep1
chr1	162204646	162207778	chr1	162465720	162468849	chr1	162467490	162467971	shCONT_rep1
chr1	162211659	162214496	chr1	162465720	162468849	chr1	162467490	162467971	shCONT_rep1
chr1	162317994	162321190	chr1	162465720	162468849	chr1	162467490	162467971	shCONT_rep1
chr1	162448872	162450005	chr1	162465720	162468849	chr1	162467490	162467971	shCONT_rep1
chr1	162457972	162459480	chr1	162465720	162468849	chr1	162467490	162467971	shCONT_rep1
chr1	162465720	162468849	chr1	162477559	162478769	chr1	162467490	162467971	shCONT_rep1
chr1	162465720	162468849	chr1	162519750	162521442	chr1	162467490	162467971	shCONT_rep1
chr1	162465720	162468849	chr1	162529051	162532737	chr1	162467490	162467971	shCONT_rep1
chr1	162465720	162468849	chr1	165613793	165615163	chr1	162467490	162467971	shCONT_rep1
chr1	16258137	16259270	chr1	16302560	16303786	chr1	16302315	16302792	shCONT_rep1
chr1	16302560	16303786	chr1	16304449	16307599	chr1	16302315	16302792	shCONT_rep1
chr1	16402886	16406752	chr1	16693038	16694535	chr1	16693362	16694184	shCONT_rep1
chr1	165573029	165574405	chr1	165795112	165797659	chr1	165797031	165797280	shCONT_rep1
chr1	165599226	165601622	chr1	165795112	165797659	chr1	165797031	165797280	shCONT_rep1
chr1	165599226	165601622	chr1	247493367	247495670	chr1	247494833	247495229	shCONT_rep1
chr1	16563146	16565590	chr1	16693038	16694535	chr1	16693362	16694184	shCONT_rep1
chr1	165667091	165673722	chr1	165795112	165797659	chr1	165797031	165797280	shCONT_rep1
chr1	165735825	165740359	chr1	165795112	165797659	chr1	165797031	165797280	shCONT_rep1
chr1	165764387	165767278	chr1	165795112	165797659	chr1	165797031	165797280	shCONT_rep1
chr1	165783444	165786816	chr1	165795112	165797659	chr1	165797031	165797280	shCONT_rep1
chr1	165787751	165789015	chr1	165795112	165797659	chr1	165797031	165797280	shCONT_rep1
chr1	165789695	165791821	chr1	165795112	165797659	chr1	165797031	165797280	shCONT_rep1
chr1	165793237	165794503	chr1	165795112	165797659	chr1	165797031	165797280	shCONT_rep1
chr1	165795112	165797659	chr1	165797944	165799077	chr1	165797031	165797280	shCONT_rep1
chr1	165795112	165797659	chr1	165799343	165800520	chr1	165797031	165797280	shCONT_rep1
chr1	165795112	165797659	chr1	165800803	165802028	chr1	165797031	165797280	shCONT_rep1
chr1	165795112	165797659	chr1	165804184	165807804	chr1	165797031	165797280	shCONT_rep1
chr1	165795112	165797659	chr1	165821647	165823141	chr1	165797031	165797280	shCONT_rep1
chr1	165795112	165797659	chr1	165824695	165826027	chr1	165797031	165797280	shCONT_rep1
chr1	165795112	165797659	chr1	165826553	165830344	chr1	165797031	165797280	shCONT_rep1
chr1	165795112	165797659	chr1	165837034	165839393	chr1	165797031	165797280	shCONT_rep1
chr1	165795112	165797659	chr1	165853568	165854701	chr1	165797031	165797280	shCONT_rep1
chr1	165795112	165797659	chr1	165883503	165888638	chr1	165797031	165797280	shCONT_rep1
chr1	165795112	165797659	chr1	165893413	165895828	chr1	165797031	165797280	shCONT_rep1
chr1	16658887	16660395	chr1	16677018	16679452	chr1	16678621	16679170	shCONT_rep1
chr1	16668759	16670038	chr1	16677018	16679452	chr1	16678621	16679170	shCONT_rep1
chr1	16673037	16674170	chr1	16677018	16679452	chr1	16678621	16679170	shCONT_rep1
chr1	16677018	16679452	chr1	16680591	16681947	chr1	16678621	16679170	shCONT_rep1
chr1	16677018	16679452	chr1	16682543	16684987	chr1	16678621	16679170	shCONT_rep1
chr1	16677018	16679452	chr1	16697753	16703168	chr1	16678621	16679170	shCONT_rep1
chr1	16677018	16679452	chr1	16724348	16728493	chr1	16678621	16679170	shCONT_rep1
chr1	166776372	166779191	chr1	166843335	166847863	chr1	166845221	166845716	shCONT_rep1
chr1	166808107	166810324	chr1	166843335	166847863	chr1	166845221	166845716	shCONT_rep1
chr1	166808107	166810324	chr1	167186441	167192511	chr1	167189920	167190686	shCONT_rep1
chr1	166817870	166823182	chr1	166843335	166847863	chr1	166845221	166845716	shCONT_rep1
chr1	166817870	166823182	chr1	167520688	167525953	chr1	167522816	167523126	shCONT_rep1
chr1	166827704	166829623	chr1	166843335	166847863	chr1	166845221	166845716	shCONT_rep1
chr1	166838846	166840242	chr1	166843335	166847863	chr1	166845221	166845716	shCONT_rep1
chr1	166843335	166847863	chr1	166850397	166851533	chr1	166845221	166845716	shCONT_rep1
chr1	166843335	166847863	chr1	166851887	166854525	chr1	166845221	166845716	shCONT_rep1
chr1	166843335	166847863	chr1	166855282	166858178	chr1	166845221	166845716	shCONT_rep1
chr1	166843335	166847863	chr1	166871148	166875687	chr1	166845221	166845716	shCONT_rep1
chr1	166843335	166847863	chr1	167022061	167024419	chr1	166845221	166845716	shCONT_rep1
chr1	166843335	166847863	chr1	167027551	167029414	chr1	166845221	166845716	shCONT_rep1
chr1	166843335	166847863	chr1	167186441	167192511	chr1	166845221	166845716	shCONT_rep1
chr1	166843335	166847863	chr1	167186441	167192511	chr1	167189920	167190686	shCONT_rep1
chr1	166843335	166847863	chr1	167475778	167478801	chr1	166845221	166845716	shCONT_rep1
chr1	166855282	166858178	chr1	167186441	167192511	chr1	167189920	167190686	shCONT_rep1
chr1	166871148	166875687	chr1	167186441	167192511	chr1	167189920	167190686	shCONT_rep1
chr1	166881962	166883266	chr1	167186441	167192511	chr1	167189920	167190686	shCONT_rep1
chr1	166883787	166885921	chr1	167186441	167192511	chr1	167189920	167190686	shCONT_rep1
chr1	166908780	166911085	chr1	167186441	167192511	chr1	167189920	167190686	shCONT_rep1
chr1	16693038	16694535	chr1	16697753	16703168	chr1	16693362	16694184	shCONT_rep1
chr1	16693038	16694535	chr1	16712239	16714485	chr1	16693362	16694184	shCONT_rep1
chr1	16693038	16694535	chr1	16724348	16728493	chr1	16693362	16694184	shCONT_rep1
chr1	167033833	167036648	chr1	167186441	167192511	chr1	167189920	167190686	shCONT_rep1
chr1	167044770	167047433	chr1	167520688	167525953	chr1	167522816	167523126	shCONT_rep1
chr1	167075919	167080770	chr1	167520688	167525953	chr1	167522816	167523126	shCONT_rep1
chr1	167085757	167087584	chr1	167186441	167192511	chr1	167189920	167190686	shCONT_rep1
chr1	167092904	167094213	chr1	167186441	167192511	chr1	167189920	167190686	shCONT_rep1
chr1	167094595	167096942	chr1	167186441	167192511	chr1	167189920	167190686	shCONT_rep1
chr1	167125333	167127168	chr1	167186441	167192511	chr1	167189920	167190686	shCONT_rep1
chr1	167144636	167149048	chr1	167186441	167192511	chr1	167189920	167190686	shCONT_rep1
chr1	167157838	167160298	chr1	167186441	167192511	chr1	167189920	167190686	shCONT_rep1
chr1	167168455	167170345	chr1	167520688	167525953	chr1	167522816	167523126	shCONT_rep1
chr1	167173142	167176501	chr1	167186441	167192511	chr1	167189920	167190686	shCONT_rep1
chr1	167179982	167181167	chr1	167186441	167192511	chr1	167189920	167190686	shCONT_rep1
chr1	167186441	167192511	chr1	167192870	167194031	chr1	167189920	167190686	shCONT_rep1
chr1	167186441	167192511	chr1	167198864	167202250	chr1	167189920	167190686	shCONT_rep1
chr1	167186441	167192511	chr1	167207053	167209488	chr1	167189920	167190686	shCONT_rep1
chr1	167186441	167192511	chr1	167293257	167295434	chr1	167189920	167190686	shCONT_rep1
chr1	167186441	167192511	chr1	167296082	167300216	chr1	167189920	167190686	shCONT_rep1
chr1	167186441	167192511	chr1	167315952	167317218	chr1	167189920	167190686	shCONT_rep1
chr1	167186441	167192511	chr1	167348754	167352215	chr1	167189920	167190686	shCONT_rep1
chr1	167186441	167192511	chr1	167372701	167375133	chr1	167189920	167190686	shCONT_rep1
chr1	167186441	167192511	chr1	167400434	167403030	chr1	167189920	167190686	shCONT_rep1
chr1	167186441	167192511	chr1	167409447	167413969	chr1	167189920	167190686	shCONT_rep1
chr1	167186441	167192511	chr1	167484454	167488271	chr1	167189920	167190686	shCONT_rep1
chr1	167186441	167192511	chr1	167520688	167525953	chr1	167189920	167190686	shCONT_rep1
chr1	167186441	167192511	chr1	167520688	167525953	chr1	167522816	167523126	shCONT_rep1
chr1	167241139	167244068	chr1	167520688	167525953	chr1	167522816	167523126	shCONT_rep1
chr1	167341252	167345487	chr1	167520688	167525953	chr1	167522816	167523126	shCONT_rep1
chr1	167372701	167375133	chr1	167520688	167525953	chr1	167522816	167523126	shCONT_rep1
chr1	167400434	167403030	chr1	213030965	213033265	chr1	213031318	213031623	shCONT_rep1
chr1	167458709	167460081	chr1	167520688	167525953	chr1	167522816	167523126	shCONT_rep1
chr1	167475778	167478801	chr1	167520688	167525953	chr1	167522816	167523126	shCONT_rep1
chr1	167494300	167496834	chr1	167520688	167525953	chr1	167522816	167523126	shCONT_rep1
chr1	167502038	167503862	chr1	167520688	167525953	chr1	167522816	167523126	shCONT_rep1
chr1	167511112	167514968	chr1	167520688	167525953	chr1	167522816	167523126	shCONT_rep1
chr1	167516024	167517157	chr1	167520688	167525953	chr1	167522816	167523126	shCONT_rep1
chr1	167517874	167519007	chr1	167520688	167525953	chr1	167522816	167523126	shCONT_rep1
chr1	167520688	167525953	chr1	167528421	167530035	chr1	167522816	167523126	shCONT_rep1
chr1	167520688	167525953	chr1	167530582	167531715	chr1	167522816	167523126	shCONT_rep1
chr1	167520688	167525953	chr1	167532359	167535143	chr1	167522816	167523126	shCONT_rep1
chr1	167520688	167525953	chr1	167536057	167537450	chr1	167522816	167523126	shCONT_rep1
chr1	167520688	167525953	chr1	167541604	167545104	chr1	167522816	167523126	shCONT_rep1
chr1	167520688	167525953	chr1	167549370	167552582	chr1	167522816	167523126	shCONT_rep1
chr1	167520688	167525953	chr1	167556323	167557685	chr1	167522816	167523126	shCONT_rep1
chr1	167520688	167525953	chr1	167572714	167574908	chr1	167522816	167523126	shCONT_rep1
chr1	167520688	167525953	chr1	167604181	167609661	chr1	167522816	167523126	shCONT_rep1
chr1	167520688	167525953	chr1	167618230	167622217	chr1	167522816	167523126	shCONT_rep1
chr1	167520688	167525953	chr1	167647823	167650101	chr1	167522816	167523126	shCONT_rep1
chr1	167520688	167525953	chr1	167650541	167651807	chr1	167522816	167523126	shCONT_rep1
chr1	167520688	167525953	chr1	167655693	167656994	chr1	167522816	167523126	shCONT_rep1
chr1	167520688	167525953	chr1	167662545	167664839	chr1	167522816	167523126	shCONT_rep1
chr1	167520688	167525953	chr1	175321965	175324404	chr1	167522816	167523126	shCONT_rep1
chr1	167689766	167692783	chr1	167904267	167907010	chr1	167905221	167905755	shCONT_rep1
chr1	167758393	167760126	chr1	167904267	167907010	chr1	167905221	167905755	shCONT_rep1
chr1	167830985	167834758	chr1	167904267	167907010	chr1	167905221	167905755	shCONT_rep1
chr1	167873655	167875734	chr1	167904267	167907010	chr1	167905221	167905755	shCONT_rep1
chr1	167891233	167893710	chr1	167904267	167907010	chr1	167905221	167905755	shCONT_rep1
chr1	167895343	167900151	chr1	167904267	167907010	chr1	167905221	167905755	shCONT_rep1
chr1	167904267	167907010	chr1	167929095	167931976	chr1	167905221	167905755	shCONT_rep1
chr1	167904267	167907010	chr1	168028256	168030362	chr1	167905221	167905755	shCONT_rep1
chr1	167904267	167907010	chr1	168050943	168056613	chr1	167905221	167905755	shCONT_rep1
chr1	16886698	16887872	chr1	17247592	17255480	chr1	16886741	16887194	shCONT_rep1
chr1	16886698	16887872	chr1	230288205	230292999	chr1	16886741	16887194	shCONT_rep1
chr1	16891911	16894689	chr1	16928501	16932213	chr1	16892419	16893853	shCONT_rep1
chr1	16891911	16894689	chr1	16928501	16932213	chr1	16891063	16892188	shCONT_rep1
chr1	16891911	16894689	chr1	16938639	16942402	chr1	16892419	16893853	shCONT_rep1
chr1	16891911	16894689	chr1	16938639	16942402	chr1	16891063	16892188	shCONT_rep1
chr1	16891911	16894689	chr1	16956833	16963904	chr1	16892419	16893853	shCONT_rep1
chr1	16891911	16894689	chr1	16956833	16963904	chr1	16891063	16892188	shCONT_rep1
chr1	16891911	16894689	chr1	17018814	17021568	chr1	16892419	16893853	shCONT_rep1
chr1	16891911	16894689	chr1	17018814	17021568	chr1	16891063	16892188	shCONT_rep1
chr1	16891911	16894689	chr1	17049957	17055090	chr1	16892419	16893853	shCONT_rep1
chr1	16891911	16894689	chr1	17049957	17055090	chr1	16891063	16892188	shCONT_rep1
chr1	16891911	16894689	chr1	17247592	17255480	chr1	16892419	16893853	shCONT_rep1
chr1	16891911	16894689	chr1	17247592	17255480	chr1	16891063	16892188	shCONT_rep1
chr1	169454363	169456126	chr1	169861681	169863846	chr1	169862942	169863543	shCONT_rep1
chr1	169763411	169764771	chr1	169861681	169863846	chr1	169862942	169863543	shCONT_rep1
chr1	169856702	169858296	chr1	169861681	169863846	chr1	169862942	169863543	shCONT_rep1
chr1	169859549	169860697	chr1	169861681	169863846	chr1	169862942	169863543	shCONT_rep1
chr1	169861681	169863846	chr1	169866956	169868089	chr1	169862942	169863543	shCONT_rep1
chr1	169861681	169863846	chr1	169868429	169871267	chr1	169862942	169863543	shCONT_rep1
chr1	169861681	169863846	chr1	170042323	170044767	chr1	169862942	169863543	shCONT_rep1
chr1	171852551	171856196	chr1	172501054	172503245	chr1	172502196	172502570	shCONT_rep1
chr1	172321436	172324035	chr1	172501054	172503245	chr1	172502196	172502570	shCONT_rep1
chr1	17233335	17235091	chr1	17378977	17380976	chr1	17380298	17380737	shCONT_rep1
chr1	172409181	172416025	chr1	172501054	172503245	chr1	172502196	172502570	shCONT_rep1
chr1	172434963	172438886	chr1	172501054	172503245	chr1	172502196	172502570	shCONT_rep1
chr1	172465787	172470599	chr1	172501054	172503245	chr1	172502196	172502570	shCONT_rep1
chr1	172494186	172495473	chr1	172501054	172503245	chr1	172502196	172502570	shCONT_rep1
chr1	172498803	172500069	chr1	172501054	172503245	chr1	172502196	172502570	shCONT_rep1
chr1	172501054	172503245	chr1	172512297	172513614	chr1	172502196	172502570	shCONT_rep1
chr1	172501054	172503245	chr1	172515135	172516268	chr1	172502196	172502570	shCONT_rep1
chr1	172501054	172503245	chr1	172625788	172629128	chr1	172502196	172502570	shCONT_rep1
chr1	172501054	172503245	chr1	213717400	213720652	chr1	172502196	172502570	shCONT_rep1
chr1	17272043	17275658	chr1	17378977	17380976	chr1	17380298	17380737	shCONT_rep1
chr1	173091298	173093719	chr1	173990342	173995289	chr1	173991224	173991585	shCONT_rep1
chr1	17378977	17380976	chr1	17381883	17383854	chr1	17380298	17380737	shCONT_rep1
chr1	17378977	17380976	chr1	17554349	17557727	chr1	17380298	17380737	shCONT_rep1
chr1	173824596	173827023	chr1	173990342	173995289	chr1	173991224	173991585	shCONT_rep1
chr1	173824596	173827023	chr1	184019872	184021715	chr1	184020705	184021224	shCONT_rep1
chr1	173973049	173974852	chr1	173990342	173995289	chr1	173991224	173991585	shCONT_rep1
chr1	173978019	173980043	chr1	173990342	173995289	chr1	173991224	173991585	shCONT_rep1
chr1	173983710	173985541	chr1	173990342	173995289	chr1	173991224	173991585	shCONT_rep1
chr1	173988565	173989698	chr1	173990342	173995289	chr1	173991224	173991585	shCONT_rep1
chr1	173990342	173995289	chr1	174001008	174002151	chr1	173991224	173991585	shCONT_rep1
chr1	173990342	173995289	chr1	174002469	174003871	chr1	173991224	173991585	shCONT_rep1
chr1	173990342	173995289	chr1	174063471	174064668	chr1	173991224	173991585	shCONT_rep1
chr1	173990342	173995289	chr1	174127859	174130274	chr1	173991224	173991585	shCONT_rep1
chr1	173990342	173995289	chr1	174173370	174175598	chr1	173991224	173991585	shCONT_rep1
chr1	174827706	174829774	chr1	174991752	174994837	chr1	174992370	174992709	shCONT_rep1
chr1	174958854	174961122	chr1	174991752	174994837	chr1	174992370	174992709	shCONT_rep1
chr1	174966686	174970614	chr1	174991752	174994837	chr1	174992370	174992709	shCONT_rep1
chr1	174986008	174988382	chr1	174991752	174994837	chr1	174992370	174992709	shCONT_rep1
chr1	174989377	174990643	chr1	174991752	174994837	chr1	174992370	174992709	shCONT_rep1
chr1	174991752	174994837	chr1	174996301	174997451	chr1	174992370	174992709	shCONT_rep1
chr1	174991752	174994837	chr1	174998018	175001535	chr1	174992370	174992709	shCONT_rep1
chr1	174991752	174994837	chr1	175008781	175010185	chr1	174992370	174992709	shCONT_rep1
chr1	174991752	174994837	chr1	175030969	175033462	chr1	174992370	174992709	shCONT_rep1
chr1	174991752	174994837	chr1	175046671	175049688	chr1	174992370	174992709	shCONT_rep1
chr1	174991752	174994837	chr1	175055635	175058723	chr1	174992370	174992709	shCONT_rep1
chr1	174991752	174994837	chr1	175083766	175088378	chr1	174992370	174992709	shCONT_rep1
chr1	174991752	174994837	chr1	175091668	175093718	chr1	174992370	174992709	shCONT_rep1
chr1	174991752	174994837	chr1	175098347	175100811	chr1	174992370	174992709	shCONT_rep1
chr1	174991752	174994837	chr1	175108775	175111451	chr1	174992370	174992709	shCONT_rep1
chr1	174991752	174994837	chr1	230764770	230765986	chr1	174992370	174992709	shCONT_rep1
chr1	176042439	176044293	chr1	231556024	231558821	chr1	231558072	231558576	shCONT_rep1
chr1	17757610	17759346	chr1	43229433	43234849	chr1	43232475	43233174	shCONT_rep1
chr1	178035227	178039313	chr1	178691953	178694661	chr1	178694487	178695221	shCONT_rep1
chr1	178335419	178337718	chr1	178994157	178996207	chr1	178994979	178995413	shCONT_rep1
chr1	178472471	178475222	chr1	178994157	178996207	chr1	178994979	178995413	shCONT_rep1
chr1	178476986	178478447	chr1	178691953	178694661	chr1	178694487	178695221	shCONT_rep1
chr1	178500879	178502427	chr1	178691953	178694661	chr1	178694487	178695221	shCONT_rep1
chr1	178977909	178982044	chr1	178994157	178996207	chr1	178994979	178995413	shCONT_rep1
chr1	178985534	178987080	chr1	178994157	178996207	chr1	178994979	178995413	shCONT_rep1
chr1	178992524	178993884	chr1	178994157	178996207	chr1	178994979	178995413	shCONT_rep1
chr1	178994157	178996207	chr1	178997208	178998960	chr1	178994979	178995413	shCONT_rep1
chr1	179049738	179052111	chr1	179196508	179199795	chr1	179198380	179199044	shCONT_rep1
chr1	179089619	179092892	chr1	179196508	179199795	chr1	179198380	179199044	shCONT_rep1
chr1	179130339	179131623	chr1	179196508	179199795	chr1	179198380	179199044	shCONT_rep1
chr1	179183846	179186859	chr1	179196508	179199795	chr1	179198380	179199044	shCONT_rep1
chr1	179187772	179189126	chr1	179196508	179199795	chr1	179198380	179199044	shCONT_rep1
chr1	179196508	179199795	chr1	179203443	179205661	chr1	179198380	179199044	shCONT_rep1
chr1	179196508	179199795	chr1	179206826	179207976	chr1	179198380	179199044	shCONT_rep1
chr1	179333439	179336876	chr1	179850510	179852770	chr1	179851434	179851930	shCONT_rep1
chr1	179826419	179827552	chr1	179850510	179852770	chr1	179851434	179851930	shCONT_rep1
chr1	179839461	179841964	chr1	179850510	179852770	chr1	179851434	179851930	shCONT_rep1
chr1	179845762	179847564	chr1	179850510	179852770	chr1	179851434	179851930	shCONT_rep1
chr1	179848554	179849772	chr1	179850510	179852770	chr1	179851434	179851930	shCONT_rep1
chr1	179850510	179852770	chr1	179854629	179856264	chr1	179851434	179851930	shCONT_rep1
chr1	179850510	179852770	chr1	179943040	179944346	chr1	179851434	179851930	shCONT_rep1
chr1	179850510	179852770	chr1	180039064	180041140	chr1	179851434	179851930	shCONT_rep1
chr1	179850510	179852770	chr1	182282375	182283508	chr1	179851434	179851930	shCONT_rep1
chr1	179889688	179890889	chr1	179921176	179925031	chr1	179923590	179924256	shCONT_rep1
chr1	179895449	179900229	chr1	179921176	179925031	chr1	179923590	179924256	shCONT_rep1
chr1	179902086	179904559	chr1	179921176	179925031	chr1	179923590	179924256	shCONT_rep1
chr1	179909073	179910356	chr1	179921176	179925031	chr1	179923590	179924256	shCONT_rep1
chr1	179917009	179918269	chr1	179921176	179925031	chr1	179923590	179924256	shCONT_rep1
chr1	179921176	179925031	chr1	179929612	179931912	chr1	179923590	179924256	shCONT_rep1
chr1	179921176	179925031	chr1	179935068	179936462	chr1	179923590	179924256	shCONT_rep1
chr1	179921176	179925031	chr1	179945481	179946954	chr1	179923590	179924256	shCONT_rep1
chr1	179921176	179925031	chr1	179973990	179975933	chr1	179923590	179924256	shCONT_rep1
chr1	179921176	179925031	chr1	180121858	180127067	chr1	179923590	179924256	shCONT_rep1
chr1	179921176	179925031	chr1	181063067	181067859	chr1	179923590	179924256	shCONT_rep1
chr1	180153604	180156557	chr1	185122492	185127330	chr1	185125547	185125868	shCONT_rep1
chr1	180428859	180431232	chr1	180599852	180603444	chr1	180601001	180601371	shCONT_rep1
chr1	180470740	180472457	chr1	180599852	180603444	chr1	180601001	180601371	shCONT_rep1
chr1	180483911	180487534	chr1	180599852	180603444	chr1	180601001	180601371	shCONT_rep1
chr1	180491626	180495237	chr1	180599852	180603444	chr1	180601001	180601371	shCONT_rep1
chr1	180514881	180520205	chr1	180599852	180603444	chr1	180601001	180601371	shCONT_rep1
chr1	180521150	180523802	chr1	180599852	180603444	chr1	180601001	180601371	shCONT_rep1
chr1	180533270	180537145	chr1	180599852	180603444	chr1	180601001	180601371	shCONT_rep1
chr1	180572593	180575596	chr1	180599852	180603444	chr1	180601001	180601371	shCONT_rep1
[truncated: 195,719 more rows]
