# Supplementary material for: Transcription Elongation Machinery Is a Druggable Dependency and Potentiates Immunotherapy in Glioblastoma Stem Cells
Source: Oxford University Press journal article supplement (doi:10.1158/2159-8290.cd-20-1848), 2022-01-13
Supplement: 21598290cd201848-sup-257762_2_supp_7373642_qyxwb1.xlsx [file 21598290cd201848-sup-257762_2_supp_7373642_qyxwb1.xlsx]

## Sheet: Sheet1
Supplementary Table S4. YY1 expression correlated drug responses in brain cancer cells lines.
Drug	Brain cancer cell line number	Pearson coefficient	P value
3-Cl-AHPC	43	-0.56913	6.81907e-05
clofarabine	44	-0.546113	0.000125775
CD-437	42	-0.495797	0.000841304
ML162	42	-0.494632	0.000869163
dinaciclib	21	-0.669609	0.000899331
ruxolitinib	43	-0.478846	0.00116078
CAY10618	44	-0.470386	0.00127268
alvocidib	21	-0.646967	0.00152545
1S,3R-RSL-3	43	-0.467111	0.0015892
LE-135	42	-0.465539	0.00189138
ciclopirox	44	-0.452862	0.0020237
AT-406	24	-0.583398	0.00276755
SCH-79797	42	-0.447416	0.00296988
cerulenin	40	-0.453866	0.00326538
BMS-345541	41	-0.441959	0.00381569
STF-31	43	-0.429774	0.0040245
erastin	44	-0.419585	0.00457933
LY-2183240	42	-0.418971	0.0057515
alisertib	43	-0.413963	0.00578819
cucurbitacin I	40	-0.42001	0.0069717
entinostat	44	-0.391053	0.00867221
BRD-K51490254	41	-0.404182	0.00877049
isoevodiamine	41	-0.403722	0.00885487
MST-312	42	-0.398597	0.00893341
bendamustine	42	-0.398289	0.00899114
cytarabine hydrochloride	44	-0.389229	0.00901725
CR-1-31B	42	-0.394481	0.00973339
N9-isopropylolomoucine	40	-0.403333	0.00986072
SR-II-138A	44	-0.382011	0.0105006
ML031	40	-0.395309	0.0115814
tosedostat	37	-0.41003	0.0117211
NSC632839	42	-0.379849	0.0130944
daporinad	40	-0.384676	0.0142503
parbendazole	44	-0.36377	0.015211
narciclasine	44	-0.362159	0.0157018
AT13387	21	-0.513662	0.0172292
teniposide	22	-0.500409	0.0176986
SB-743921	43	-0.356085	0.0190987
omacetaxine mepesuccinate	27	-0.446966	0.0194185
manumycin A	43	-0.354093	0.0198293
leptomycin B	44	-0.348287	0.020513
neuronal differentiation inducer III	44	-0.345983	0.0214213
ML210	43	-0.345904	0.0230836
HLI 373	40	0.35824	0.0232206
GMX-1778	42	-0.349568	0.0232556
triazolothiadiazine	42	-0.349335	0.0233541
topotecan	41	-0.349756	0.0249876
SNX-2112	44	-0.336654	0.0254507
GSK461364	38	-0.360011	0.0264081
KX2-391	42	-0.340861	0.0271753
TW-37	42	-0.340462	0.0273673
BRD-K34485477	15	0.566603	0.0276467
SNS-032	37	-0.358152	0.0295138
YM-155	41	-0.339517	0.029878
avicin D	21	0.466982	0.0328221
YK 4-279	43	-0.325932	0.0329308
BRD-K34099515	16	-0.532095	0.0338713
etoposide	44	-0.318343	0.0352051
PIK-93	39	-0.336948	0.0359451
BI-2536	43	-0.320755	0.0359832
CIL55	19	-0.475557	0.0395988
valdecoxib	40	-0.322511	0.0423921
BYL-719	27	-0.393096	0.0425172
gemcitabine	41	-0.315818	0.0442734
linifanib	44	-0.304122	0.0447431
doxorubicin	44	-0.304087	0.0447689
phloretin	42	-0.310752	0.0451747
B02	42	-0.308722	0.046673
MK-1775	41	-0.310995	0.0478001
triptolide	43	-0.302319	0.048793
BRD-K27224038	16	0.496566	0.0503975
SB-225002	43	-0.294201	0.0554953
CAY10594	42	0.29683	0.0562755
BRD-K34222889	43	-0.293243	0.0563328
spautin-1	42	-0.296441	0.0566144
tretinoin	43	-0.292518	0.0569735
ELCPK	21	-0.420497	0.0576903
CID-5951923	43	-0.287805	0.0612803
BRD-K26531177	39	-0.302181	0.0615256
axitinib	43	-0.286685	0.0623415
PHA-793887	44	-0.283251	0.0624419
NVP-BEZ235	27	-0.362915	0.0628095
sildenafil	40	0.296556	0.0631469
FQI-1	22	-0.400354	0.0648472
austocystin D	40	-0.293879	0.0656812
PF-184	41	-0.28911	0.066754
pazopanib	43	-0.282137	0.0667998
neopeltolide	16	-0.46844	0.0672333
paclitaxel	43	-0.280733	0.0682267
NSC19630	27	-0.354202	0.0698812
parthenolide	39	-0.293219	0.070044
betulinic acid	41	0.285328	0.0705615
RG-108	41	-0.281828	0.0742358
KU-0063794	44	-0.268656	0.0778433
panobinostat	41	-0.27703	0.0795158
KHS101	42	-0.272705	0.0805882
KPT185	27	-0.341582	0.0811913
CHM-1	44	-0.265388	0.0816697
BRD8958	40	0.276654	0.0839626
necrosulfonamide	26	-0.345236	0.084104
ML311	44	-0.259243	0.089261
imatinib	42	-0.264957	0.0899325
Ko-143	44	-0.257307	0.0917636
COL-3	27	-0.330697	0.0920225
BRD-K44224150	16	0.433051	0.0938307
Ki8751	38	-0.275191	0.0944875
NVP-BSK805	42	0.260891	0.0951601
AZD8055	44	-0.254315	0.0957357
ceranib-2	43	-0.256781	0.0964706
XL765	41	-0.262339	0.0975182
Merck60	43	-0.255639	0.0980133
gossypol	41	-0.260775	0.0996059
ML239	44	-0.25012	0.101529
BRD-A86708339	21	-0.36592	0.10282
NVP-231	38	-0.266297	0.106081
SKI-II	39	-0.260941	0.108605
MK-2206	39	-0.259033	0.111308
TG-100-115	43	0.246226	0.111464
LRRK2-IN-1	27	-0.311947	0.113183
indisulam	35	-0.27196	0.114002
pevonedistat	44	-0.241437	0.114367
PX-12	41	-0.249957	0.114992
TPCA-1	43	-0.243569	0.115503
afatinib	41	0.246937	0.119593
temozolomide	43	-0.240738	0.119928
canertinib	42	0.243564	0.1201
UNC0321	43	0.239082	0.122574
erlotinib	42	0.240027	0.125748
BRD-K48334597	16	-0.3957	0.129235
linsitinib	43	-0.23442	0.130261
AZD7545	43	-0.234212	0.130612
SID 26681509	39	-0.246072	0.131032
FQI-2	44	-0.228937	0.134964
CIL55A	22	-0.327131	0.137264
nakiterpiosin	41	-0.234787	0.139509
momelotinib	43	-0.228115	0.141224
ML312	15	-0.39775	0.142043
hyperforin	42	-0.230243	0.142402
prochlorperazine	44	0.223003	0.145657
PAC-1	39	-0.236891	0.146499
BRD-K17060750	44	-0.222381	0.146812
palmostatin B	25	0.29796	0.148002
methotrexate	42	-0.223029	0.155687
BRD-K11533227	38	-0.23182	0.161376
methylstat	25	-0.28824	0.162329
BRD-A71883111	41	-0.221218	0.164537
thalidomide	21	0.31234	0.168063
quizartinib	42	-0.215057	0.171397
NPC-26	40	0.220466	0.171619
bleomycin A2	35	-0.236002	0.172294
CIL41	22	-0.300874	0.173633
BCL-LZH-4	21	0.308082	0.174247
L-685458	44	-0.208122	0.1752
PF-750	37	-0.225631	0.179354
BRD-K97651142	40	-0.216119	0.180438
BRD-K33199242	43	0.207974	0.180806
dacarbazine	42	-0.207284	0.18778
trametinib	21	0.29845	0.188808
isoliquiritigenin	14	0.3701	0.192738
PD 153035	27	0.256597	0.196361
ML258	43	-0.199104	0.200546
TGX-221	43	0.197299	0.204739
obatoclax	44	-0.194773	0.205171
sorafenib	43	-0.195787	0.208301
BRD6340	42	-0.198161	0.208394
SGX-523	43	-0.192997	0.214987
rigosertib	39	-0.202426	0.216509
PRL-3 inhibitor I	42	0.193247	0.220129
belinostat	21	-0.277838	0.222677
AZD7762	44	-0.187567	0.222761
oligomycin A	40	-0.197115	0.222791
Ch-55	41	-0.194369	0.223324
mitomycin	44	-0.186832	0.224614
ibrutinib	27	-0.241483	0.224952
istradefylline	21	-0.276242	0.225457
blebbistatin	14	-0.345339	0.226541
docetaxel	15	-0.33179	0.226995
PD318088	44	0.18562	0.227688
AT7867	40	-0.194093	0.230109
EX-527	41	-0.191521	0.230314
PRIMA-1-Met	22	-0.266293	0.230958
CBB-1007	21	0.271195	0.234392
vincristine	43	-0.185113	0.234676
BRD-K14844214	44	-0.18271	0.235191
GW-843682X	42	-0.18596	0.238355
ISOX	43	-0.182601	0.241198
KW-2449	43	-0.182074	0.242583
BRD-K09587429	39	0.191342	0.243263
BRD-K96431673	16	-0.309492	0.243426
ABT-199	26	-0.235273	0.247275
apicidin	43	-0.180219	0.247497
selumetinib	40	0.186832	0.248352
BRD-K61166597	39	-0.187994	0.251763
BRD1378	41	-0.182146	0.254369
SN-38	37	-0.188922	0.262779
BRD8899	43	-0.173925	0.26467
VER-155008	44	-0.171574	0.265445
MGCD-265	43	-0.173465	0.265954
RITA	41	-0.177601	0.266614
fluorouracil	41	-0.176704	0.269077
bosutinib	41	-0.176216	0.270422
sirolimus	43	-0.171723	0.270861
BRD-K29086754	16	0.29061	0.274865
BRD-K48477130	19	0.262944	0.276764
sitagliptin	16	-0.28847	0.278575
MK-0752	41	-0.172355	0.281226
Repligen 136	37	-0.180345	0.285461
VU0155056	42	-0.168689	0.285559
CAY10576	41	-0.16722	0.296023
GSK2636771	26	-0.21065	0.301636
importazole	40	0.166765	0.303718
SCH-529074	40	-0.165656	0.30699
PRIMA-1	37	-0.172146	0.308291
IPR-456	44	-0.155265	0.314231
BRD-K30748066	3	-0.879799	0.315355
dabrafenib	21	0.229867	0.316158
FSC231	16	-0.266887	0.317683
navitoclax	42	0.15738	0.319553
tigecycline	23	-0.215603	0.323144
PL-DI	40	-0.159981	0.324086
ouabain	43	-0.15342	0.325989
AZ-3146	41	0.157163	0.32643
C6-ceramide	44	-0.151193	0.327246
MLN2238	44	-0.150958	0.328008
curcumin	43	-0.152654	0.328437
BRD-K66532283	34	-0.172606	0.328984
BRD-A94377914	21	-0.223113	0.330974
cabozantinib	42	-0.153242	0.332601
ML029	39	-0.158287	0.335835
zebularine	43	-0.147461	0.34535
ABT-737	35	0.161867	0.352896
BRD-K51831558	20	-0.216827	0.358496
NVP-TAE684	43	0.14265	0.361489
PF-4800567 hydrochloride	21	0.209708	0.361579
NSC95397	38	-0.15158	0.36364
HBX-41108	27	-0.181053	0.366121
BRD9876	44	-0.137573	0.373183
PYR-41	43	-0.135467	0.386411
bardoxolone methyl	33	-0.155412	0.387798
purmorphamine	37	-0.146028	0.388466
cytochalasin B	44	-0.132862	0.389922
lapatinib	38	0.143206	0.391044
piperlongumine	41	-0.137327	0.39189
fluvastatin	40	-0.138824	0.392934
tamoxifen	42	0.13522	0.393211
marinopyrrole A	25	-0.178502	0.393269
LY-2157299	14	0.245863	0.396836
tubastatin A	22	0.189379	0.398617
BRD1835	39	0.138893	0.399082
TG-101348	40	0.136851	0.399759
WP1130	41	-0.133565	0.405113
simvastatin	41	-0.133339	0.405915
vandetanib	41	0.133313	0.406008
BRD-K02492147	38	-0.138764	0.406056
BRD-K70511574	41	-0.132792	0.40786
BRD-K16147474	40	-0.134009	0.409711
cyclophosphamide	22	0.183659	0.413272
IC-87114	44	0.125389	0.417366
IU1	40	0.131842	0.417394
ML050	43	-0.126127	0.420286
gefitinib	40	0.12999	0.424022
968	16	-0.213339	0.427584
DNMDP	43	-0.123361	0.430632
BRD-K24690302	41	-0.126082	0.432164
isonicotinohydroxamic acid	25	0.164406	0.432272
etomoxir	43	-0.122729	0.433014
BRD-K42260513	21	-0.179946	0.43508
MG-132	18	0.195925	0.435884
BRD-K49290616	16	0.208869	0.437555
BRD1812	42	-0.121646	0.442831
BRD-K30019337	16	0.206459	0.442981
NSC 74859	43	-0.119681	0.444611
pandacostat	40	-0.12395	0.446051
elocalcitol	39	0.124919	0.448625
VAF-347	18	0.189944	0.450296
dasatinib	44	-0.116177	0.452658
BRD-K04800985	41	0.120584	0.452662
OSI-027	43	-0.116586	0.45656
BRD-K84807411	16	0.19941	0.459043
olaparib	43	-0.115402	0.461178
WAY-362450	43	0.114459	0.464873
BRD-K37390332	41	0.116642	0.467681
procarbazine	41	0.115847	0.470739
tanespimycin	42	-0.113659	0.473566
BRD-K64610608	41	-0.113717	0.47899
ifosfamide	22	-0.158562	0.480942
RO4929097	21	-0.162296	0.482135
tipifarnib-P1	43	-0.109665	0.483898
SZ4TA2	21	0.16097	0.48577
BRD-K90370028	21	0.160283	0.487656
BMS-754807	42	-0.109917	0.488341
semagacestat	43	-0.108373	0.489095
AZD4547	43	0.1081	0.490195
GSK525762A	43	0.107858	0.491173
GSK4112	43	-0.107645	0.492035
AZD6482	43	-0.107567	0.492352
BMS-270394	43	-0.107404	0.493012
vemurafenib	40	-0.111262	0.494294
BRD-K75293299	15	-0.189827	0.498015
itraconazole	39	-0.110853	0.501692
cediranib	21	0.153527	0.506419
GSK-3 inhibitor IX	41	-0.106562	0.507254
JW-55	6	-0.341774	0.507301
ZSTK474	41	-0.106081	0.509181
O-6-benzylguanine	21	0.152347	0.509731
KU-60019	43	-0.103307	0.509743
pitstop2	25	0.138218	0.509971
brivanib	43	0.103041	0.510843
tivozanib	41	-0.103613	0.519144
CD-1530	37	-0.109022	0.520669
BEC	15	-0.179793	0.521403
BRD-K13999467	43	-0.0990965	0.527237
CIL56	22	-0.141277	0.530577
CI-976	42	-0.0994992	0.530707
BIBR-1532	44	0.0964055	0.533597
crizotinib	39	-0.102315	0.535391
ciclosporin	41	-0.0994109	0.536319
birinapant	41	-0.0991155	0.537536
tipifarnib-P2	21	-0.142367	0.538155
cimetidine	16	0.165267	0.540753
BRD-K78574327	16	0.16394	0.544055
myriocin	16	0.163827	0.544335
SU11274	42	0.0955666	0.547153
cyanoquinoline 11	22	-0.135662	0.547199
azacitidine	42	-0.0949717	0.549661
MLN2480	21	0.137253	0.552995
neratinib	42	0.0924012	0.560564
BRD-K92856060	41	0.0925927	0.564759
pyrazolanthrone	43	-0.0899164	0.566367
SMER-3	34	0.10178	0.566802
GANT-61	43	0.0898148	0.566807
trifluoperazine	40	0.092807	0.568961
CHIR-99021	43	-0.0872815	0.577841
ML203	43	-0.0868272	0.579829
regorafenib	42	-0.0877158	0.580692
Bax channel blocker	30	-0.104957	0.580965
GDC-0879	42	0.0874199	0.581974
necrostatin-1	40	0.0896384	0.582281
BRD-K71781559	43	0.0860069	0.583428
ML006	42	-0.0867533	0.584866
avrainvillamide	28	-0.106852	0.588383
AC55649	42	-0.0859234	0.588477
BRD-K80183349	42	-0.085885	0.588644
BIRB-796	43	-0.0838708	0.592847
Mdivi-1	42	0.0849074	0.59291
BRD5468	39	-0.0878044	0.595054
SB-525334	43	-0.0830422	0.596518
bexarotene	43	-0.083002	0.596697
NSC23766	41	0.0839004	0.601996
tozasertib	3	-0.584365	0.602687
BRD-K33514849	3	0.583645	0.603252
RAF265	36	0.0890756	0.605421
BRD4132	42	-0.080762	0.611149
Compound 23 citrate	44	0.0780623	0.614493
salermide	25	-0.105821	0.61466
ML320	41	-0.0809097	0.615049
BRD-K41334119	16	0.135778	0.616099
A-804598	24	-0.106316	0.620994
SJ-172550	41	0.0792276	0.622443
GW-405833	42	-0.0778892	0.623927
silmitasertib	41	0.0787636	0.624489
vorapaxar	41	-0.0769432	0.632543
SRT-1720	37	0.0811644	0.632972
BRD-K02251932	42	-0.0757447	0.633538
BRD9647	43	-0.074555	0.634683
tamatinib	41	-0.075864	0.637338
BRD-K35604418	43	-0.0737803	0.638216
BRD-K52037352	37	-0.0783696	0.644761
BRD-A05715709	19	0.111971	0.648121
KU-55933	44	-0.0701292	0.651017
erismodegib	41	0.0723291	0.653144
nilotinib	43	0.0698095	0.656446
BRD-A02303741	40	0.0718967	0.659309
abiraterone	6	0.229844	0.661305
pifithrin-mu	43	-0.0687143	0.661509
JQ-1	43	-0.0683425	0.663232
BRD-M00053801	19	-0.105411	0.667573
niclosamide	43	-0.067355	0.667814
nelarabine	43	-0.0649759	0.678905
OSI-930	38	-0.0692466	0.679532
veliparib	43	-0.0640997	0.683006
fingolimod	43	-0.0640444	0.683266
Compound 7d-cis	37	-0.068787	0.68582
tacrolimus	37	0.0683427	0.687747
BRD-K28456706	39	-0.0648502	0.694891
BRD-K29313308	42	0.0616411	0.698169
ML083	41	-0.0624064	0.6983
UNC0638	43	0.060829	0.698395
R428	27	-0.0778481	0.699529
nintedanib	41	0.0610225	0.704684
WZ4002	27	-0.0764032	0.704858
PF-573228	44	-0.0583832	0.706588
NSC48300	42	-0.0594592	0.708373
lovastatin	43	0.0584987	0.709433
serdemetan	41	-0.0587645	0.715145
nutlin-3	44	-0.0548314	0.723709
tacedinaline	27	-0.0686435	0.733702
darinaparsin	23	0.072813	0.741276
BRD-K55116708	41	0.0524359	0.744731
BRD-K63431240	44	0.0499718	0.747351
ETP-46464	25	0.0675753	0.748252
MI-1	40	-0.0520031	0.749967
BRD-K50799972	44	-0.0493477	0.750405
fumonisin B1	43	-0.0494155	0.753002
lenvatinib	43	-0.0489082	0.75546
chlorambucil	41	-0.0500015	0.756212
tivantinib	20	-0.0732177	0.75902
AM-580	41	-0.0490249	0.760832
PLX-4720	43	0.0470704	0.764381
CCT036477	42	0.0469137	0.767976
BRD-K45681478	42	0.0466103	0.769436
BRD-K85133207	41	-0.0467289	0.771727
saracatinib	44	0.0448157	0.772688
SB-431542	41	-0.0433149	0.788007
epigallocatechin-3-monogallate	35	0.0469827	0.788694
Compound 1541A	42	0.0423618	0.789954
BRD-K09344309	6	0.140119	0.791198
BMS-536924	41	-0.0421975	0.793355
decitabine	43	-0.0410713	0.79371
BRD-K88742110	41	0.0418388	0.795074
KH-CB19	25	-0.0531052	0.800956
HC-067047	39	0.040463	0.806789
NSC30930	43	-0.037432	0.811642
AA-COCF3	40	0.0386474	0.812839
pluripotin	41	-0.0380726	0.813177
NVP-ADW742	39	0.0377616	0.819468
temsirolimus	22	-0.0514985	0.819957
masitinib	39	-0.0375964	0.820244
PDMP	42	0.0358313	0.821763
BRD-K86535717	16	-0.0606555	0.823422
myricetin	42	-0.0352175	0.824768
WZ8040	36	-0.0378982	0.826305
KU 0060648	42	-0.0335245	0.83307
necrostatin-7	43	0.0320076	0.838545
AZD1480	19	0.0492205	0.841401
BRD-K66453893	40	0.0319747	0.844717
JW-74	25	-0.0405343	0.847449
BMS-195614	41	0.0302388	0.851129
ML334 diastereomer	27	0.0374617	0.852828
MI-2	21	-0.042329	0.855442
BRD-K01737880	3	0.224064	0.856135
vorinostat	40	-0.0289219	0.859387
BRD-K99006945	21	0.0410878	0.85964
CIL70	23	0.0386335	0.86107
SR1001	41	0.0278645	0.862702
GSK-J4	3	-0.210699	0.864852
brefeldin A	41	0.0265112	0.869311
FGIN-1-27	15	0.0459126	0.870931
barasertib	41	-0.024974	0.876829
staurosporine	16	0.0415828	0.878474
GDC-0941	43	-0.0239436	0.878868
sunitinib	42	0.0237469	0.881337
skepinone-L	21	-0.0326412	0.888298
BRD-K41597374	43	0.0220089	0.888592
BRD-K27986637	16	0.0367875	0.892408
JW-480	41	0.0208928	0.896839
DBeQ	43	-0.0194094	0.901682
dexamethasone	39	-0.0201574	0.903058
CAL-101	41	-0.0195745	0.903316
QS-11	16	-0.0329313	0.903634
fulvestrant	15	-0.0339641	0.904353
PI-103	42	-0.0177639	0.911095
StemRegenin 1	43	0.0170311	0.913681
PF-3758309	21	-0.0247996	0.915025
BRD-K96970199	16	-0.0254118	0.925573
sotrastaurin	26	0.0187954	0.927387
BRD-K19103580	43	0.01334	0.932339
foretinib	42	0.0119067	0.940344
bortezomib	40	0.0120657	0.941095
AGK-2	43	-0.0109878	0.944249
lomeguatrib	43	-0.0109701	0.944338
bafilomycin A1	3	-0.0798992	0.94908
tandutinib	40	0.0100083	0.951126
I-BET151	43	0.00755153	0.961668
QW-BI-011	15	-0.0108171	0.96948
GSK1059615	19	-0.00713881	0.976861
BIX-01294	40	-0.0040703	0.980114
pifithrin-alpha	40	0.00372149	0.981817
PF-543	43	0.00164337	0.991655
16-beta-bromoandrosterone	39	-0.000968979	0.995329
